# Supplementary material for: Acetylation of alcohols and amines under visible light irradiation: diacetyl as an acylation reagent and photosensitizer
Source: Royal Society of Chemistry journal article supplement (doi:10.1039/d1qo01613j), 2021-11-19

## Supporting Information

# Acetylation of Alcohols and Amines under Visible Light Irradiation: Diacetyl as an Acylation Reagent and Photosensitizer

Pengcheng Lian, Ruyi Li, Xiao Wan, Zixin Xiang, Hang Liu, Zhiyu Cao, and Xiaobing Wan\*

*Key Laboratory of Organic Synthesis of Jiangsu Province, College of Chemistry, Chemical Engineering and*

*Materials Science, Soochow University, Suzhou 215123, P. R. China*

Email: wanxb@suda.edu.cn

## Table of Contents

|                                                                            |           |
|----------------------------------------------------------------------------|-----------|
| <b>General information.....</b>                                            | <b>S2</b> |
| <b>Table S1.....</b>                                                       | <b>S3</b> |
| <b>Table S2.....</b>                                                       | <b>S4</b> |
| <b>Mechanistic experiments.....</b>                                        | <b>S5</b> |
| <b>Acetylation of tertiary alcohols using Ac<sub>2</sub>O or AcCl.....</b> | <b>S6</b> |
| <b>Spectral Data for Products.....</b>                                     | <b>S8</b> |

### **General information**

Column chromatography was generally performed on silica gel (300-400 mesh) and reactions were monitored by thin layer chromatography (TLC) using UV light to visualize the course of the reactions. The  $^1\text{H}$  NMR (400 MHz) and  $^{13}\text{C}$  NMR (100 MHz) and  $^{19}\text{F}$  NMR (376 MHz) data were recorded with  $\text{CDCl}_3$  or  $\text{DMSO-d}_6$  as solvent at room temperature unless specified otherwise. The chemical shifts ( $\delta$ ) are reported in ppm and coupling constants ( $J$ ) in Hz.  $^1\text{H}$  NMR spectra was recorded with tetramethylsilane ( $\delta = 0.00$  ppm) as internal reference;  $^{13}\text{C}$  NMR spectra was recorded with  $\text{CDCl}_3$  ( $\delta = 77.00$  ppm) or  $\text{DMSO}$  ( $\delta = 39.50$  ppm) as internal reference. IR and HRMS were performed by the State-authorized Analytical Center in Soochow University.

### **Acylation of Alcohols**

To a 25 mL Schlenk tube, alcohols (0.2 mmol), Cerium (III) trifluoro methanesulfonate (0.01 mmol, 0.05 equiv., 5.9 mg) and 2,3-butanedione (0.8 mmol, 4.0 equiv., 68.9 mg) were dissolved in nitromethanol (0.5 mL). Under the irradiation of 40 W blue LEDs, the reaction mixture was stirred at room temperature under oxygen atmosphere for 24 h. After the reaction, the reaction system is quenched with sodium thiosulfate, then poured in brine solution (15 mL) and extracted with ethyl acetate (3 x 20 mL) and then dried over  $\text{MgSO}_4$ . The solvent was removed under reduced pressure and the residue was purified by silica gel column chromatography (ethyl acetate/ petroleum ether ether) to afford desired products.

### **Acylation of Amines**

To a 25 mL Schlenk tube, amines (0.2 mmol), 2,3-butanedione (1.2 mmol, 6.0 equiv., 103.3 mg) were dissolved in ethanol (95%, 0.5 mL). Under the irradiation of 40 W white LEDs, the reaction mixture was stirred at room temperature under air atmosphere for 6 h. After the reaction, the reaction system is quenched with sodium thiosulfate, then poured in brine solution (15 mL) and extracted with ethyl acetate (3 x 20 mL) and then dried over  $\text{MgSO}_4$ . The solvent was removed under reduced pressure and the residue was purified by silica gel column chromatography (ethyl acetate/ petroleum ether ether) to afford desired products.

**Table S1 Optimization of reaction conditions<sup>a</sup>**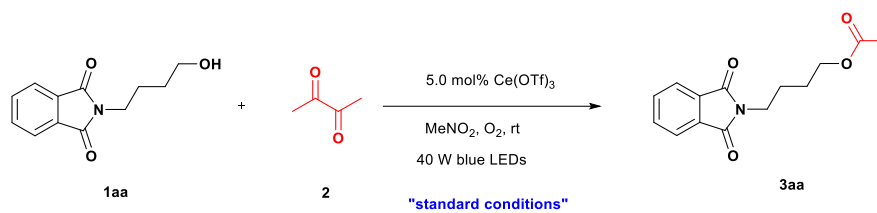

| Entry | Variation from the "standard conditions"                                        | Yield (%) <sup>b</sup> |
|-------|---------------------------------------------------------------------------------|------------------------|
| 1     | none                                                                            | 90                     |
| 2     | In the dark                                                                     | < 5                    |
| 3     | MeCN instead of MeNO <sub>2</sub>                                               | 71                     |
| 4     | Cyclohexane instead of MeNO <sub>2</sub>                                        | 62                     |
| 5     | EA instead of MeNO <sub>2</sub>                                                 | 56                     |
| 6     | Acetone instead of MeNO <sub>2</sub>                                            | 56                     |
| 7     | DMF instead of MeNO <sub>2</sub>                                                | < 5                    |
| 8     | DMSO instead of MeNO <sub>2</sub>                                               | < 5                    |
| 9     | <sup>t</sup> BuOH instead of MeNO <sub>2</sub>                                  | < 5                    |
| 10    | DCM instead of MeNO <sub>2</sub>                                                | 40                     |
| 11    | DCE instead of MeNO <sub>2</sub>                                                | 35                     |
| 12    | air instead of O <sub>2</sub>                                                   | 66                     |
| 13    | N <sub>2</sub> instead of O <sub>2</sub>                                        | < 5                    |
| 14    | AgOAc instead of Ce(OTf) <sub>3</sub>                                           | < 5                    |
| 15    | MnCl <sub>2</sub> instead of Ce(OTf) <sub>3</sub>                               | 27                     |
| 16    | Fe <sub>2</sub> (SO <sub>4</sub> ) <sub>3</sub> instead of Ce(OTf) <sub>3</sub> | < 5                    |
| 17    | CeCl <sub>3</sub> instead of Ce(OTf) <sub>3</sub>                               | < 5                    |
| 18    | Cu(OTf) <sub>2</sub> instead of Ce(OTf) <sub>3</sub>                            | 50                     |

<sup>a</sup> Reaction conditions: alcohols **1aa** (0.2 mmol), diacetyl **2** (0.8 mmol), catalyst (5.0 mol%) in solvent (0.5 mL) irradiation with 40 W blue LEDs at 28 °C for 24 h. <sup>b</sup> Isolated yield.

**Table S2. Optimization for Acylation of Amines.<sup>a</sup>**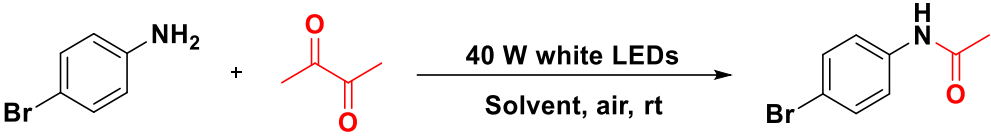

Reaction scheme: 4-bromoaniline + diacetyl  $\xrightarrow[\text{Solvent, air, rt}]{40 \text{ W white LEDs}}$  N-(4-bromophenyl)acetamide

| Entry <sup>a</sup> | Solvent           | Yield (%) <sup>b</sup> |
|--------------------|-------------------|------------------------|
| 1                  | Methanol          | 57                     |
| 2                  | Ethanol (95%)     | 85                     |
| 3                  | Isopropyl alcohol | 80                     |
| 4                  | EA                | 54                     |
| 5                  | Acetone           | 45                     |
| 6                  | 2-Butanone        | 52                     |
| 7                  | DMF               | 61                     |
| 8                  | CHCl <sub>3</sub> | 30                     |
| 9                  | CCl <sub>4</sub>  | 34                     |
| 10                 | Benzene           | 71                     |

<sup>a</sup>Reaction conditions: Under air, amine (0.2 mmol), diacetyl (6.0 equiv.) in solvent (0.5 mL) irradiation with 40 W white LEDs at ambient temperature for 6h, the reaction completed monitored by TLC. <sup>b</sup>isolated yield by column chromatography.



## Mechanistic experiments:

### Radical trapping experiments

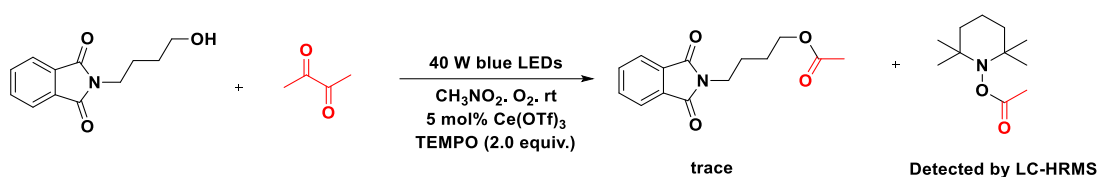

## Display Report

### Analysis Info

Analysis Name D:\Data\zyw\stu-sam\20180116\LPC1072-1\_GA8\_01\_15336.d  
Method 0919-MS-low-METHODS.m  
Sample Name LPC1072-1  
Comment

Acquisition Date 11/19/2020 5:41:57 PM

Operator brukr  
Instrument micrOTOF-Q III 8228888.20487

### Acquisition Parameter

|             |            |                       |           |                  |           |
|-------------|------------|-----------------------|-----------|------------------|-----------|
| Source Type | ESI        | Ion Polarity          | Positive  | Set Nebulizer    | 1.0 Bar   |
| Focus       | Not active | Set Capillary         | 4500 V    | Set Dry Heater   | 180 °C    |
| Scan Begin  | 50 m/z     | Set End Plate Offset  | -500 V    | Set Dry Gas      | 4.0 l/min |
| Scan End    | 3000 m/z   | Set Collision Cell RF | 200.0 Vpp | Set Divert Valve | Waste     |

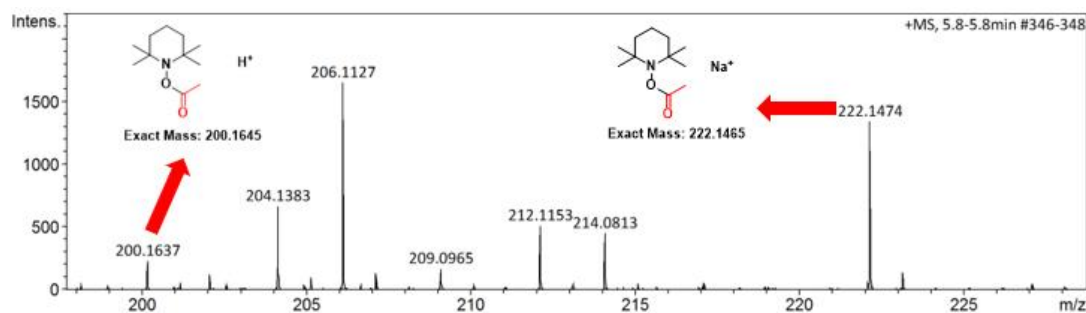

Bruker Compass DataAnalysis 4.2

printed: 11/20/2020 12:15:00 PM

by: brukr

Page 1 of 1

### Radical trapping experiments in dark

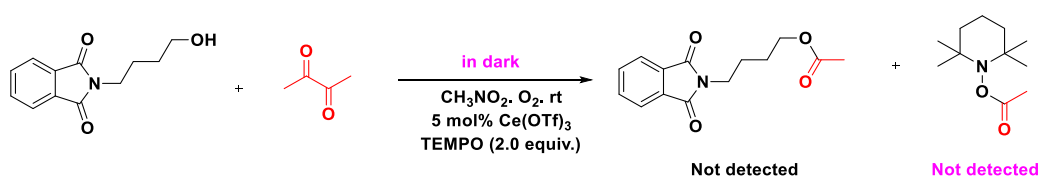

## Acetylation of tertiary alcohols using Ac<sub>2</sub>O or AcCl:

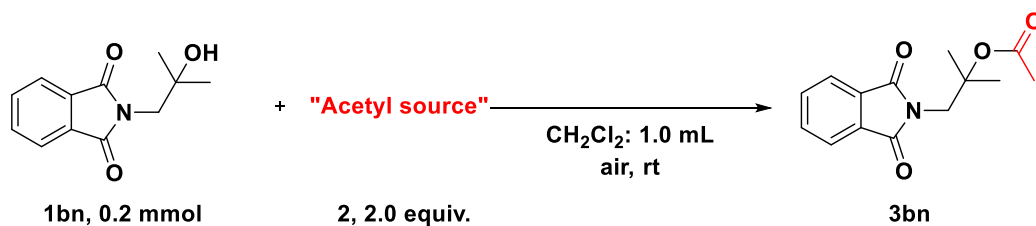

Reference: 1) M. Xie. *J. Chil. Chem. Soc.*, **2011**, 56, 884-886; 2) S. Ning, L. Zhang, J. Ma, L. Chen, G. Zeng, C. Yang, Y. Zhou, X. Guo, X. Deng, *Org. Biomol. Chem.* **2020**, 18, 4956-4961. (see Supporting Information)

| Acetyl source | (CH <sub>3</sub> CO) <sub>2</sub> O | (CH <sub>3</sub> CO) <sub>2</sub> O + Et <sub>3</sub> N |
|---------------|-------------------------------------|---------------------------------------------------------|
| Yield         | Not detected                        | Not detected                                            |

Reference: H. Li, P. Zhang, L. P. Smaga, R. A. Hoffman, J. Chan, *J. Am. Chem. Soc.* **2015**, 137, 15628-15631. (see Supporting Information)

| Acetyl source | CH <sub>3</sub> COCl | CH <sub>3</sub> COCl + Et <sub>3</sub> N |
|---------------|----------------------|------------------------------------------|
| Yield         | 10%                  | 15%                                      |

## Scale-up experiment

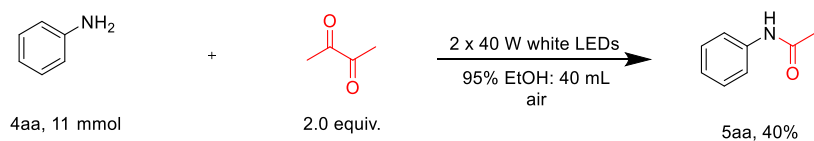

## Compare the reactivity of aliphatic vs. aromatic substrates

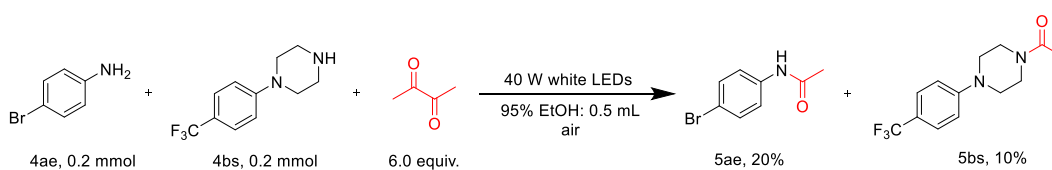

## The use of other 1,2-dicarbonyl compounds

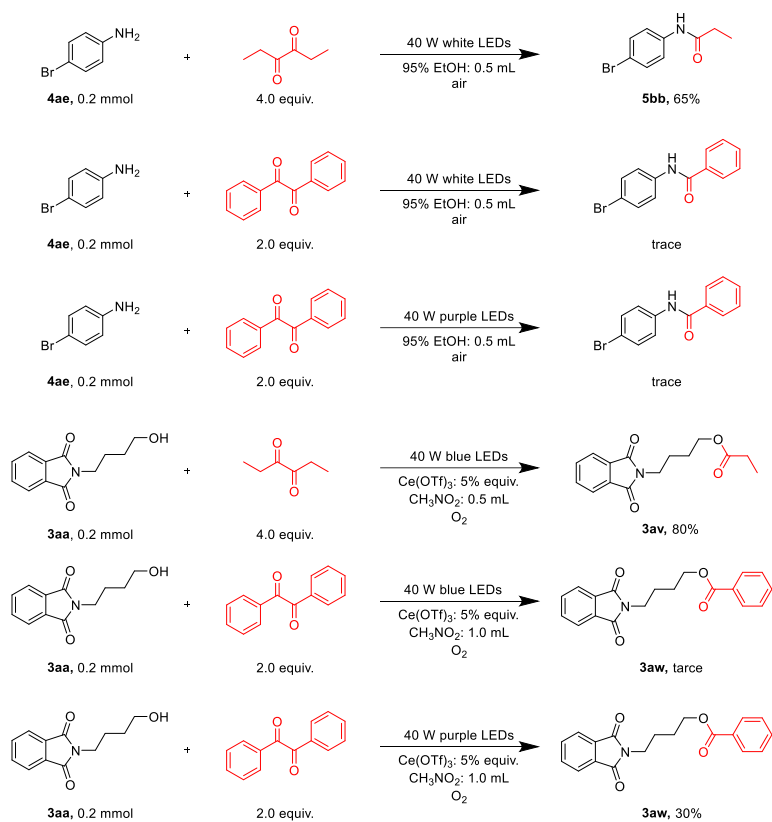

## Spectral Data for Products

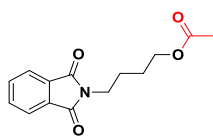

### 4-(1,3-Dioxoisindolin-2-yl)butyl acetate (3aa)

petroleum ether / ethyl acetate = 5:1, white solid, 90% yield (47.0 mg). mp: 63 – 66°C.  $^1\text{H NMR}$  (400 MHz,  $\text{CDCl}_3$ )  $\delta$  7.87 – 7.82 (m, 2H), 7.75 – 7.70 (m, 2H), 4.10 (t,  $J = 6.3$  Hz, 2H), 3.73 (t,  $J = 6.3$  Hz, 2H), 2.04 (s, 3H), 1.77 – 1.67 (m, 4H).  $^{13}\text{C NMR}$  (100 MHz,  $\text{CDCl}_3$ )  $\delta$  171.0, 168.3, 133.9, 132.0, 123.2, 63.7, 37.5, 26.0, 25.2, 20.9. **HRMS** (ESI-TOF): Anal Calcd. For.  $\text{C}_{14}\text{H}_{15}\text{NO}_4 + \text{H}^+$ : 276.1230, Found: 276.1227. **IR** (neat,  $\text{cm}^{-1}$ ):  $\nu$  2850, 1751, 1600, 1535, 1460, 1380, 1202, 1008, 719, 620.

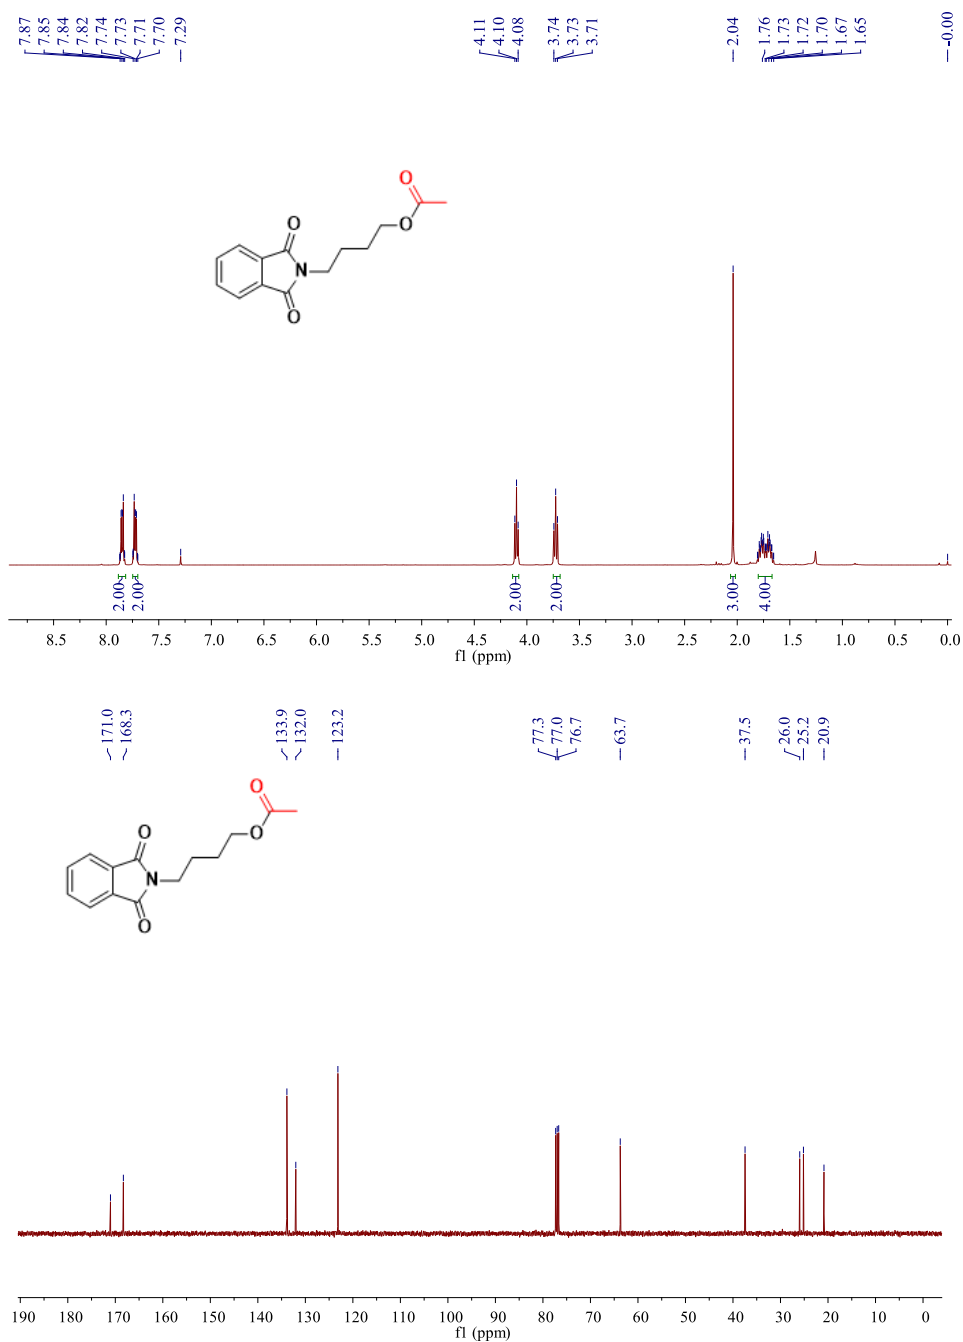

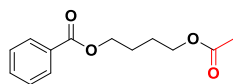

### 4-Acetoxybutyl benzoate (3ab)

petroleum ether / ethyl acetate = 15:1, colorless oil, 85% yield (40.1 mg). **<sup>1</sup>H NMR** (400 MHz, CDCl<sub>3</sub>) δ 8.05 – 8.03 (m, 2H), 7.58 – 7.54 (m, 1H), 7.44 – 7.42 (m, 2H), 4.36 (t, *J* = 6.2 Hz, 2H), 4.14 (t, *J* = 6.2 Hz, 2H), 2.05 (s, 3H), 1.88 – 1.79 (m, 4H). **<sup>13</sup>C NMR** (100 MHz, CDCl<sub>3</sub>) δ 171.1, 166.5, 132.9, 130.2, 129.5, 128.3, 64.4, 63.9, 25.4, 25.3, 20.9. **HRMS** (ESI-TOF): Anal Calcd. For. C<sub>13</sub>H<sub>16</sub>O<sub>4</sub>+H<sup>+</sup>: 237.1121, Found: 237.1117. **IR** (neat, cm<sup>-1</sup>): ν 2899, 1736, 1602, 1584, 1451, 1366, 1234, 1176, 1026, 915, 709.

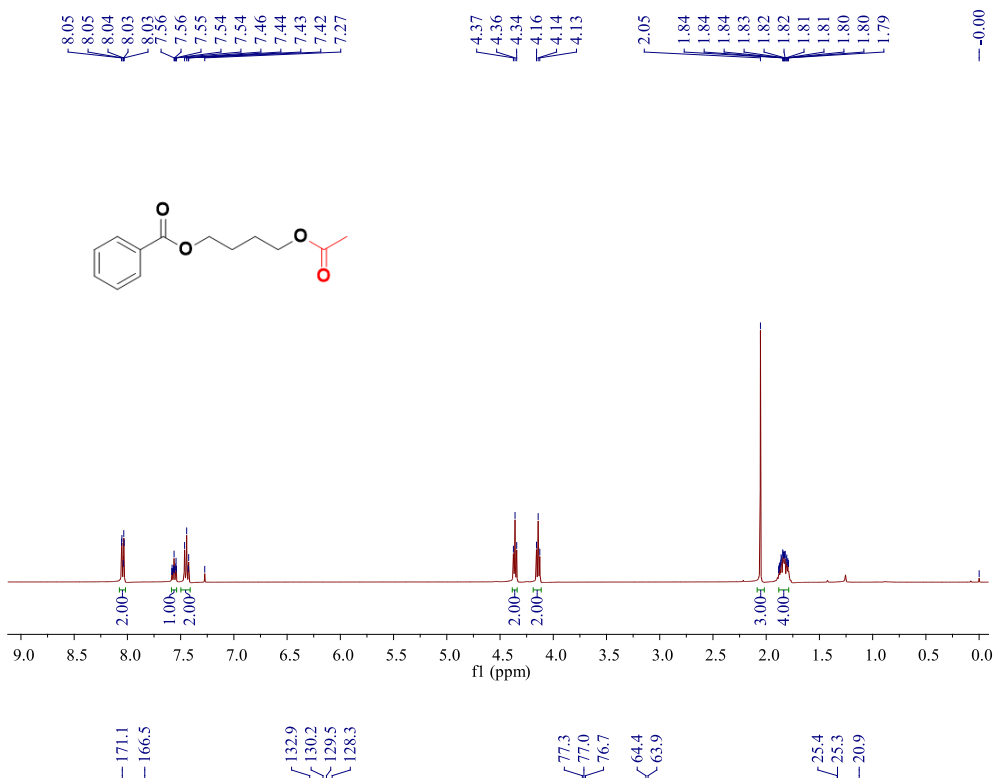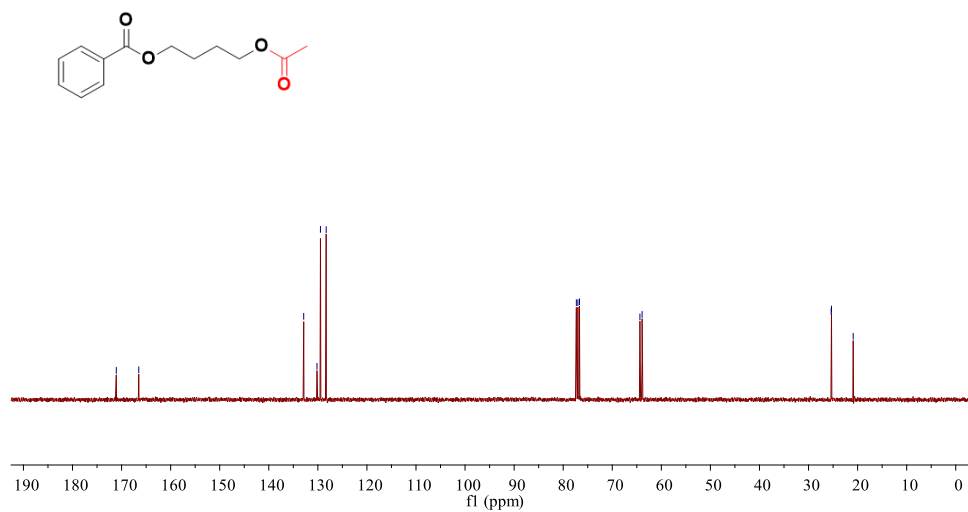

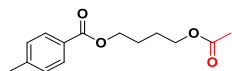

### 4-Acetoxybutyl 4-methylbenzoate (3ac)

petroleum ether / ethyl acetate = 15:1, colorless oil, 85% yield (40.1 mg).  $^1\text{H NMR}$  (400 MHz,  $\text{CDCl}_3$ )  $\delta$  7.94 – 7.92 (m, 2H), 7.25 – 7.23 (m, 2H), 4.34 (t,  $J = 6.2$  Hz, 2H), 4.14 (t,  $J = 6.2$  Hz, 2H), 2.41 (s, 3H), 2.05 (s, 3H), 1.87 – 1.76 (m, 4H).  $^{13}\text{C NMR}$  (100 MHz,  $\text{CDCl}_3$ )  $\delta$  171.1, 166.6, 143.5, 129.5, 129.0, 127.5, 64.2, 64.0, 25.4, 25.3, 21.6, 20.9. **HRMS** (ESI-TOF): Anal Calcd. For. **IR** (neat,  $\text{cm}^{-1}$ ):  $\nu$  2924, 1736, 1612, 1577, 1449, 1386, 1271, 1020, 920, 753, 690.

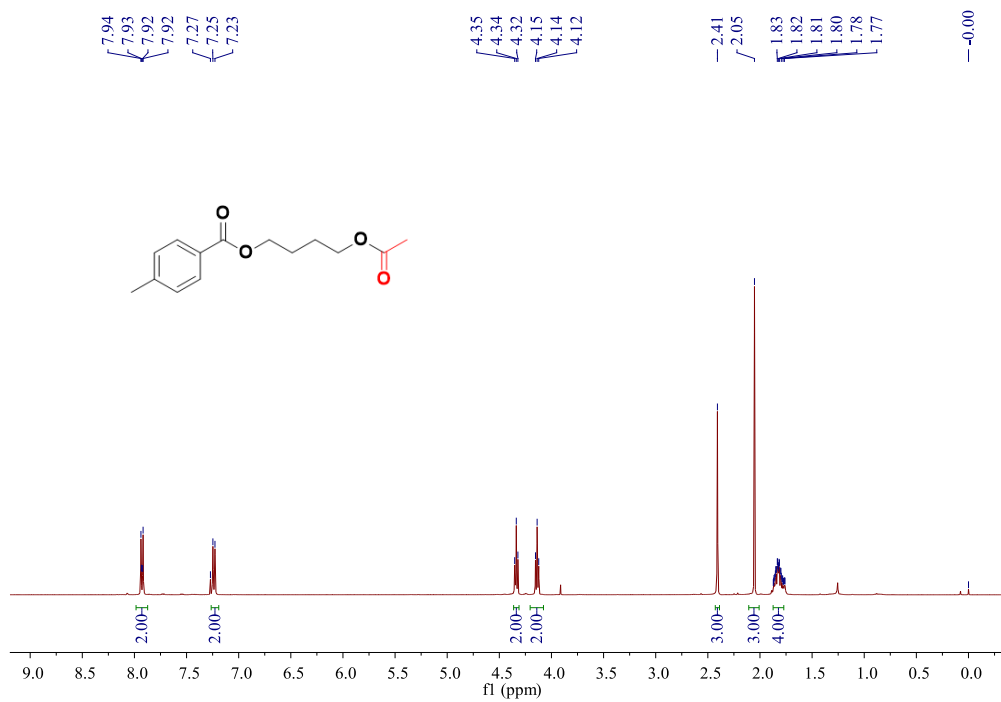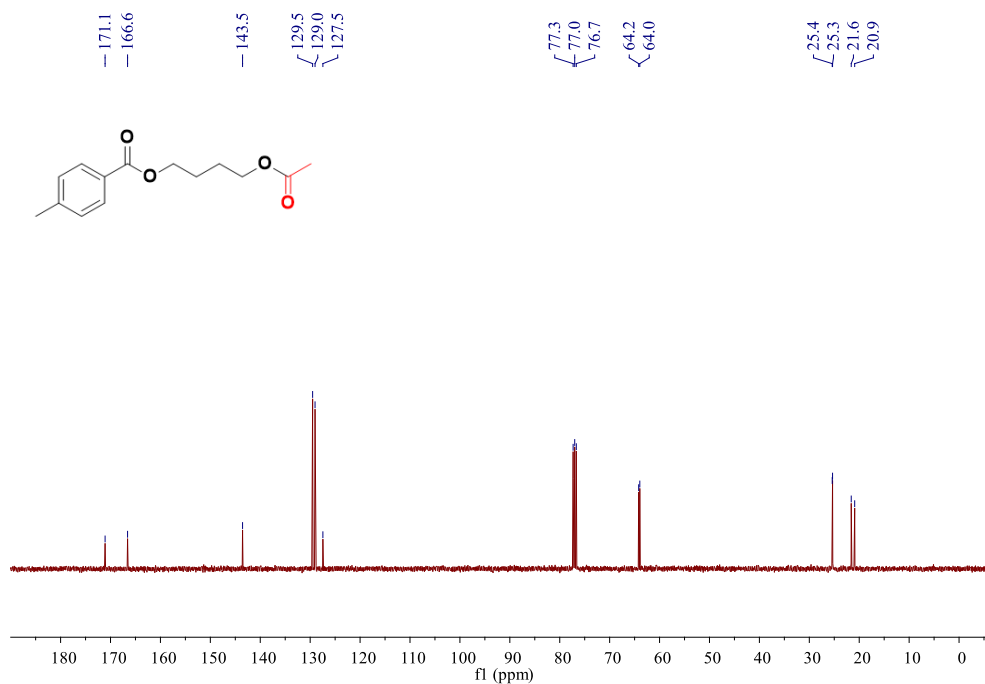

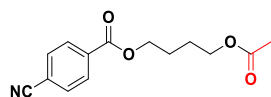

#### 4-Acetoxybutyl 4-cyanobenzoate (3ad)

petroleum ether / ethyl acetate = 10:1, colorless oil, 85% yield (44.4 mg).  $^1\text{H NMR}$  (400 MHz,  $\text{CDCl}_3$ )  $\delta$  8.15 (d,  $J = 8.6$  Hz, 2H), 7.76 (d,  $J = 8.6$  Hz, 2H), 4.40 (t,  $J = 6.3$  Hz, 2H), 4.15 (t,  $J = 6.3$  Hz, 2H), 2.06 (s, 3H), 1.90 – 1.79 (m, 2H).  $^{13}\text{C NMR}$  (100 MHz,  $\text{CDCl}_3$ )  $\delta$  171.0, 164.8, 133.9, 132.2, 130.0, 117.9, 116.3, 65.2, 63.7, 25.5, 25.2, 20.9. **HRMS** (ESI-TOF): Anal Calcd. For.  $\text{C}_{14}\text{H}_{15}\text{NO}_4 + \text{Na}^+$ : 284.0893, Found: 284.0889. **IR** (neat,  $\text{cm}^{-1}$ ):  $\nu$  2853, 2232, 1721, 1610, 1569, 1491, 1388, 1237, 1105, 729, 691.

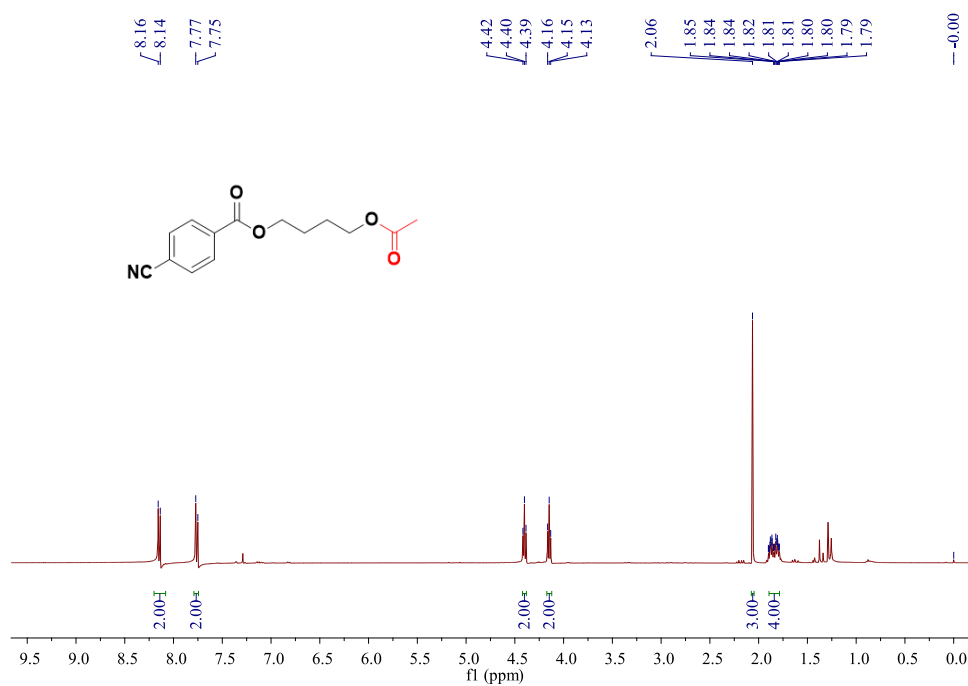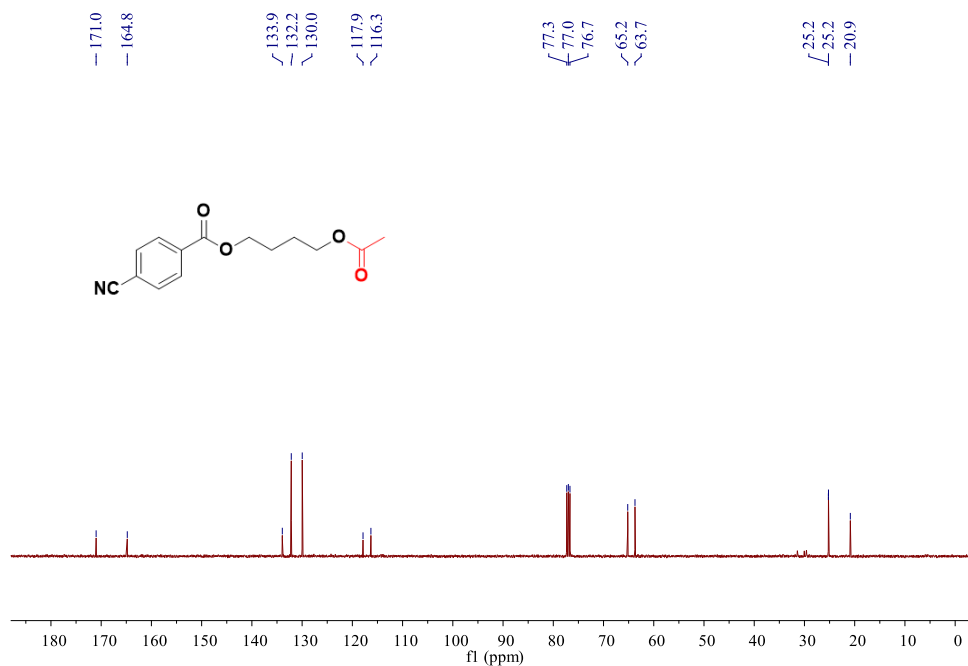

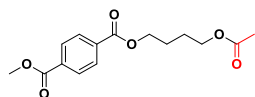

#### 4-Acetoxybutyl methyl terephthalate (3ae)

petroleum ether / ethyl acetate = 10:1, yellow oil, 80% yield (46.3 mg).  $^1\text{H NMR}$  (400 MHz,  $\text{CDCl}_3$ )  $\delta$  8.10 (s, 4H), 4.39 (t,  $J = 6.3$  Hz, 2H), 4.15 (t,  $J = 6.3$  Hz, 2H), 3.95 (s, 3H), 2.06 (s, 3H), 1.85 – 1.79 (m, 4H).  $^{13}\text{C NMR}$  (100 MHz,  $\text{CDCl}_3$ )  $\delta$  171.0, 166.2, 165.7, 134.0, 133.9, 129.5, 129.4, 64.8, 63.8, 52.4, 25.3, 25.3, 20.9. **HRMS** (ESI-TOF): Anal Calcd. For.  $\text{C}_{15}\text{H}_{18}\text{O}_6 + \text{H}^+$ : 295.1176, Found: 295.1173. **IR** (neat,  $\text{cm}^{-1}$ ):  $\nu$  2853, 1716, 1615, 1577, 1408, 1268, 1235, 1102, 962, 728.

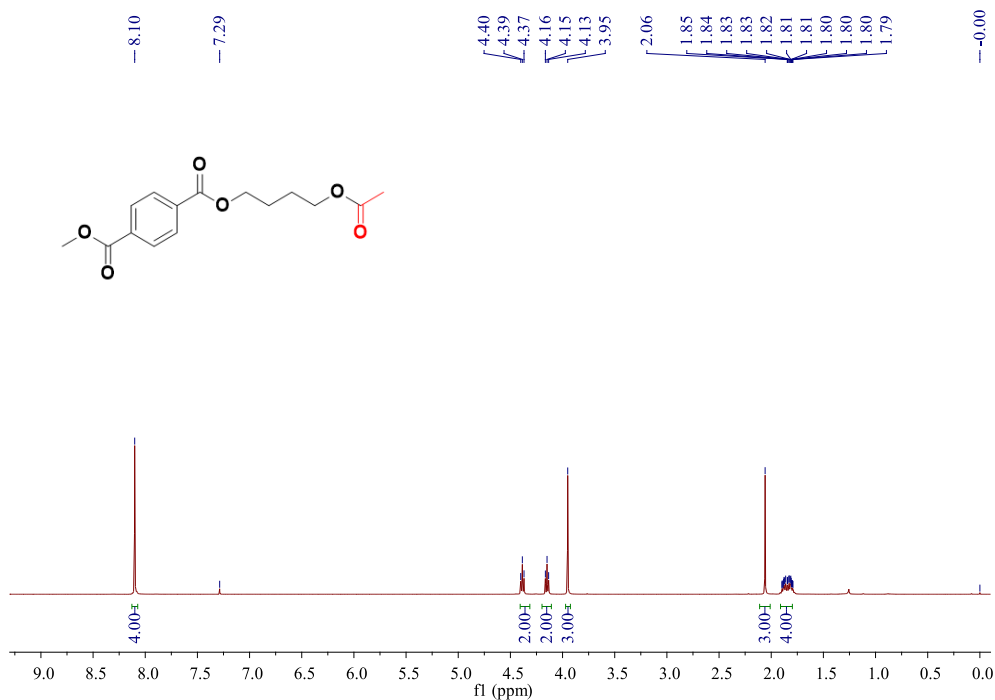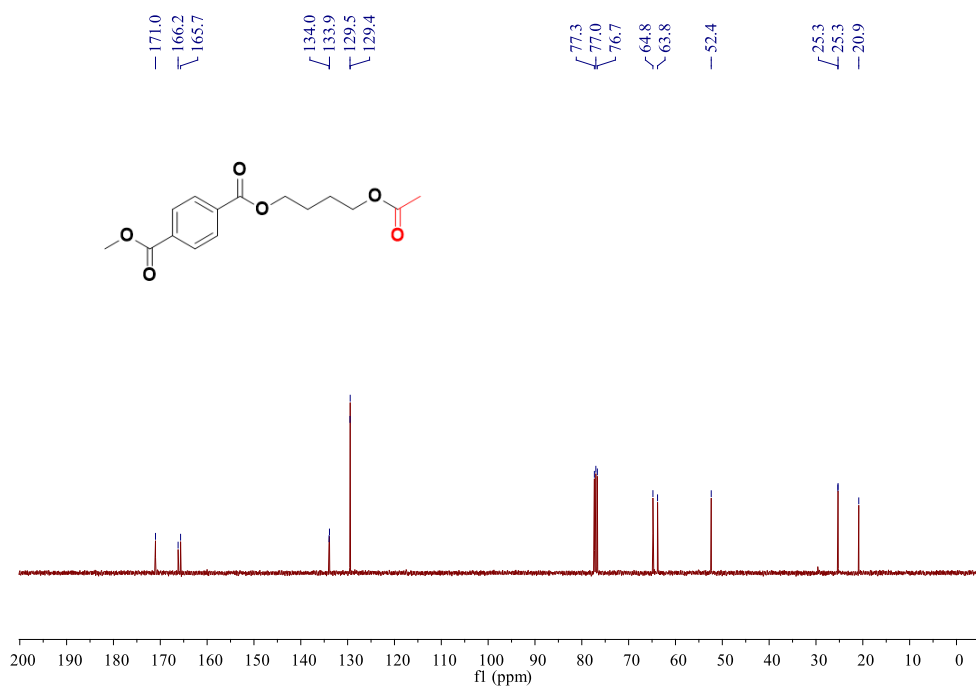



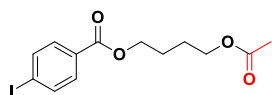

### 4-Acetoxybutyl 4-iodobenzoate (3af)

petroleum ether / ethyl acetate = 10:1, yellow oil, 78% yield (60.1 mg).  $^1\text{H NMR}$  (400 MHz,  $\text{CDCl}_3$ )  $\delta$  7.81 – 7.79 (m, 2H), 7.75 – 7.73 (m, 2H), 4.35 (t,  $J = 6.2$  Hz, 2H), 4.14 (t,  $J = 6.2$  Hz, 2H), 2.06 (s, 3H), 1.84 – 1.77 (m, 4H).  $^{13}\text{C NMR}$  (100 MHz,  $\text{CDCl}_3$ )  $\delta$  171.0, 165.9, 137.6, 130.9, 129.6, 100.7, 64.6, 63.8, 25.3, 25.3, 20.9. **HRMS** (ESI-TOF): Anal Calcd. For:  $\text{C}_{13}\text{H}_{15}\text{IO}_4 + \text{H}^+$ : 363.0088, Found: 363.0081. **IR** (neat,  $\text{cm}^{-1}$ ):  $\nu$  2853, 1716, 1585, 1470, 1364, 1232, 1006, 920, 752, 682.

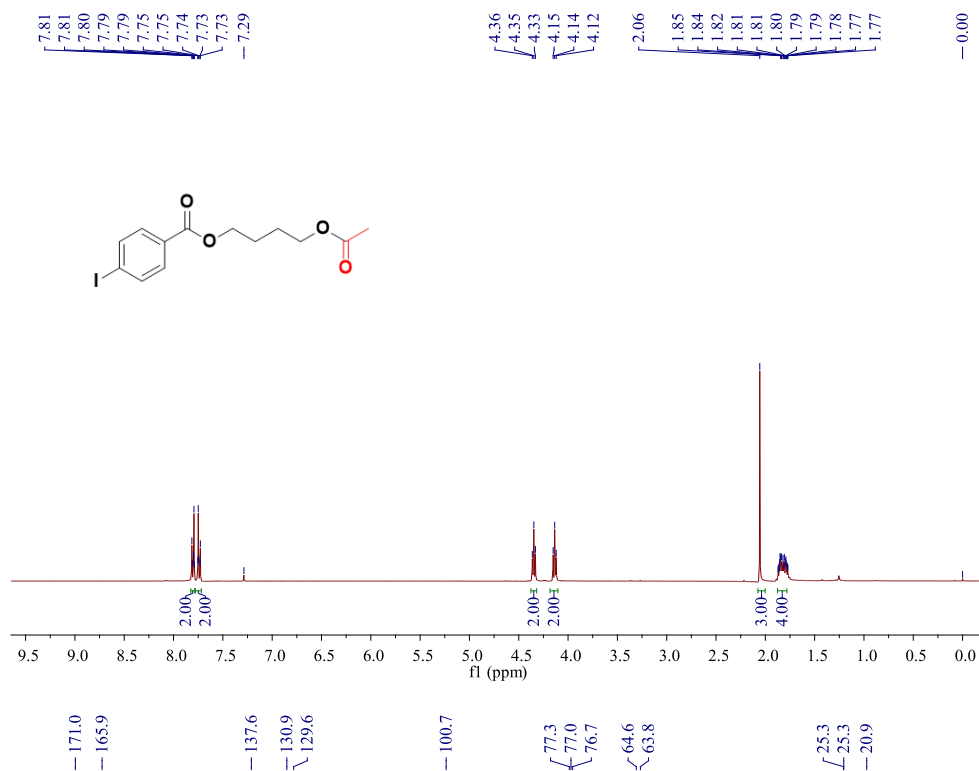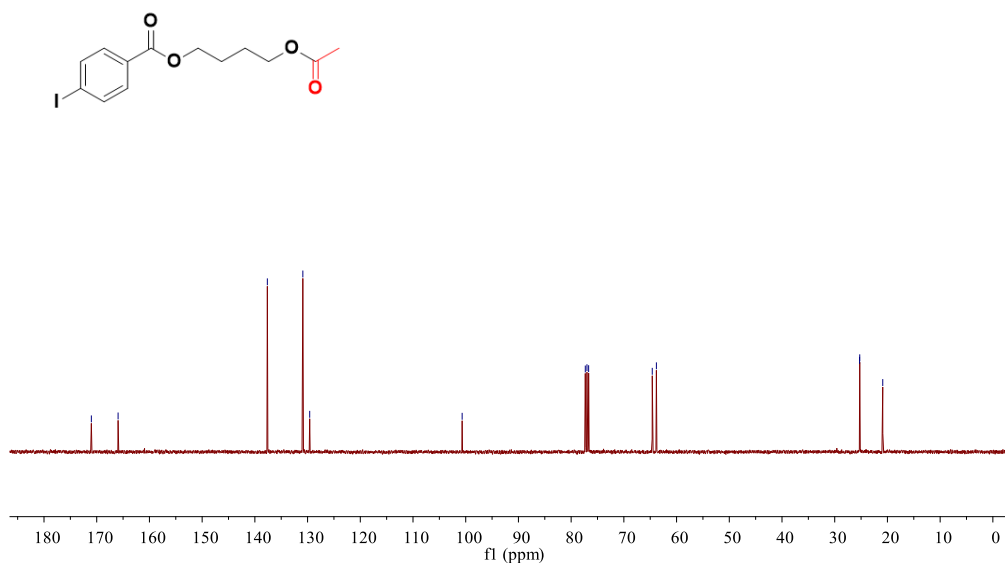

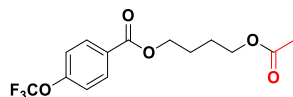

#### 4-Acetoxybutyl 4-(trifluoromethoxy)benzoate (3ag)

petroleum ether / ethyl acetate = 10:1, yellow oil, 74% yield (47.1 mg). **<sup>1</sup>H NMR** (400 MHz, CDCl<sub>3</sub>) δ 8.10 – 8.08 (m, 2H), 7.29 – 7.27 (m, 2H), 4.37 (t, *J* = 6.2 Hz, 2H), 4.14 (t, *J* = 6.2 Hz, 2H), 2.06 (s, 3H), 1.86 – 1.78 (m, 2H). **<sup>13</sup>C NMR** (100 MHz, CDCl<sub>3</sub>) δ 170.8, 165.0, 152.4, 131.3, 128.6, 120.1 (q, *J* = 257.0 Hz), 120.0, 64.5, 63.6, 25.2, 25.2, 20.5. **<sup>19</sup>F NMR** (377 MHz, CDCl<sub>3</sub>) δ -57.7 (s, 1F). **HRMS** (ESI-TOF): Anal Calcd. For. C<sub>14</sub>H<sub>15</sub>F<sub>3</sub>O<sub>5</sub>+H<sup>+</sup>: 321.0944, Found: 321.0940. **IR** (neat, cm<sup>-1</sup>): ν 2858, 1721, 1607, 1506, 1470, 1388, 1242, 1161, 951, 708, 634.

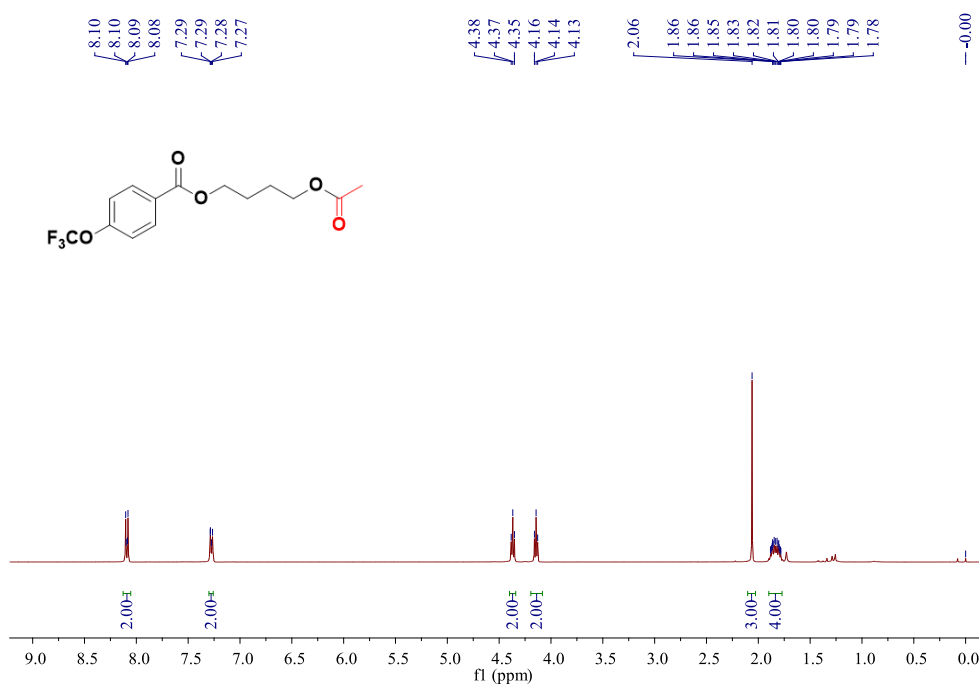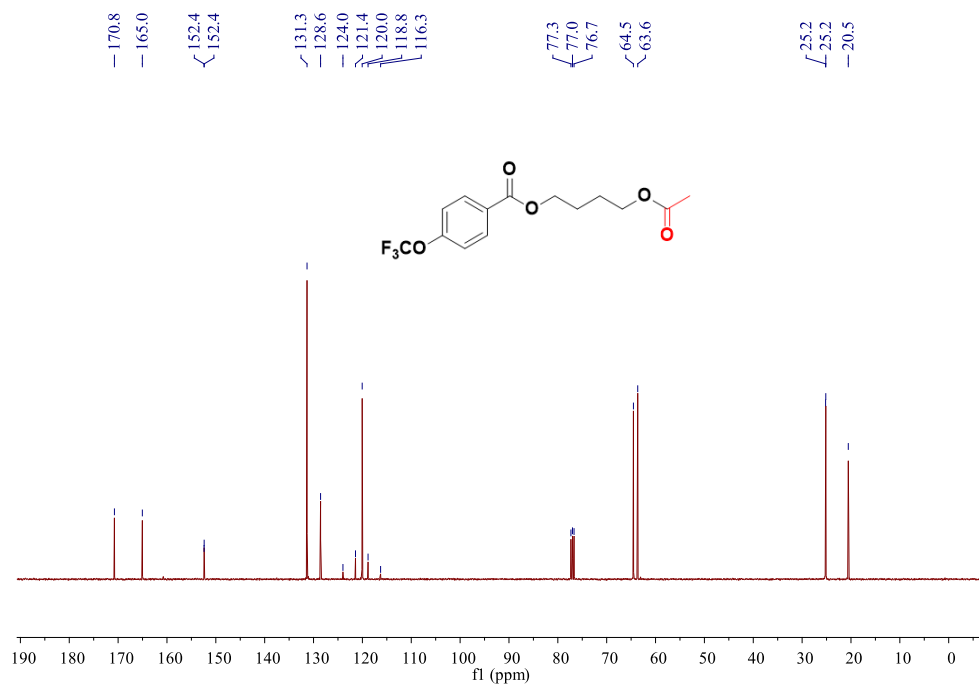

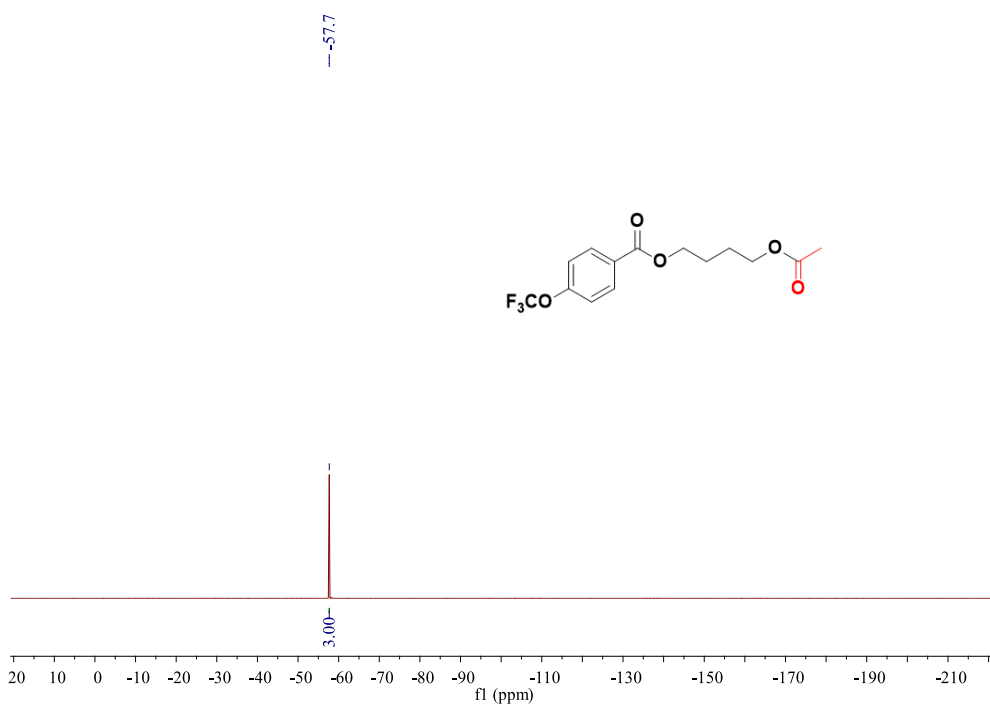

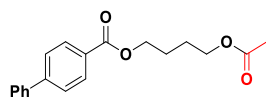

#### 4-Acetoxybutyl [1,1'-biphenyl]-4-carboxylate (3ah)

petroleum ether / ethyl acetate = 10:1, colorless oil, 80% yield (49.9 mg). **<sup>1</sup>H NMR** (400 MHz, CDCl<sub>3</sub>) δ 8.11 – 8.09 (m, 2H), 7.67 – 7.61 (m, 4H), 7.48 – 7.44 (m, 2H), 7.41 – 7.37 (m, 1H), 4.38 (t, *J* = 6.2 Hz, 2H), 4.15 (t, *J* = 6.2 Hz, 2H), 2.06 (s, 3H), 1.89 – 1.80 (m, 4H). **<sup>13</sup>C NMR** (100 MHz, CDCl<sub>3</sub>) δ 171.1, 166.4, 145.6, 139.9, 130.0, 129.0, 128.9, 128.1, 127.2, 127.0, 64.4, 63.9, 25.4, 25.4, 20.9. **HRMS** (ESI-TOF): Anal Calcd. For. C<sub>19</sub>H<sub>20</sub>O<sub>4</sub>+H<sup>+</sup>: 313.1434, Found: 313.1429. **IR** (neat, cm<sup>-1</sup>): ν 2854, 1772, 1713, 1609, 1564, 1487, 1188, 907, 727, 647.

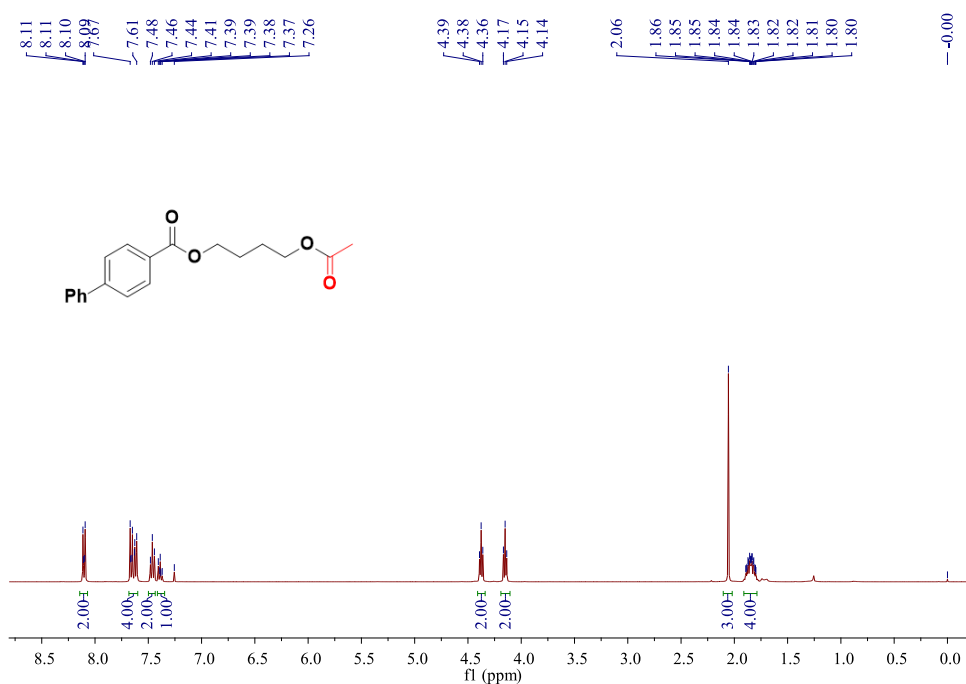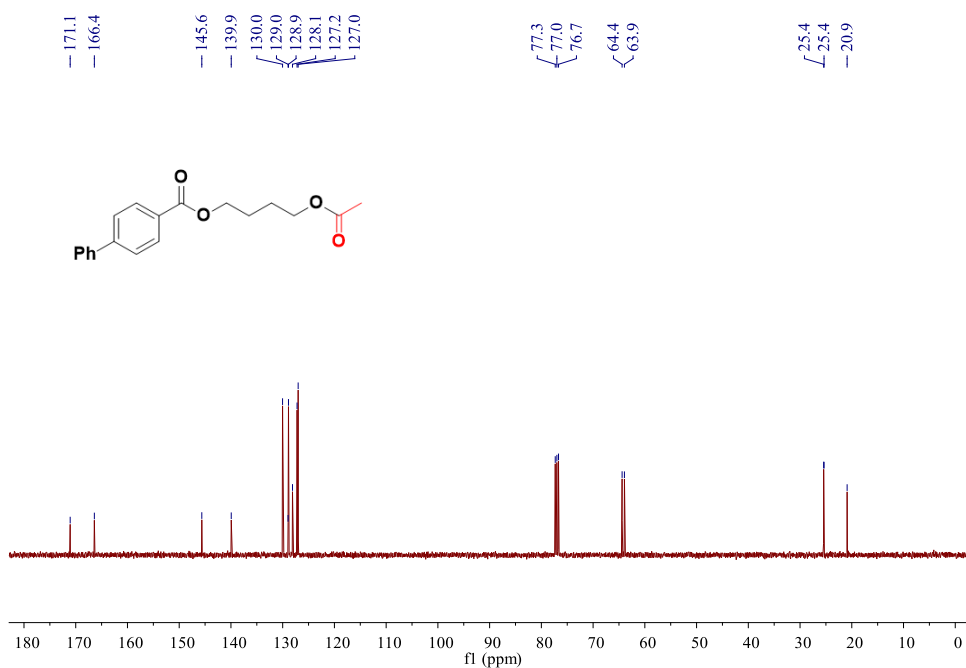

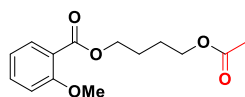

#### 4-Acetoxybutyl 2-methoxybenzoate (3ai)

petroleum ether / ethyl acetate = 10:1, colorless oil, 63% yield (33.5 mg). **<sup>1</sup>H NMR** (400 MHz, CDCl<sub>3</sub>) δ 7.80 – 7.78 (m, 1H), 7.49 – 7.45 (m, 0H), 7.00 – 6.96 (m, 2H), 4.33 (t, *J* = 6.1 Hz, 2H), 4.14 (t, *J* = 6.1 Hz, 2H), 3.90 (s, 3H), 2.05 (s, 3H), 1.85 – 1.79 (m, 4H). **<sup>13</sup>C NMR** (100 MHz, CDCl<sub>3</sub>) δ 171.2, 166.2, 159.1, 133.5, 131.5, 120.1, 112, 64.3, 64.1, 55.9, 25.4, 25.4, 21.0. **HRMS** (ESI-TOF): Anal Calcd. For. C<sub>14</sub>H<sub>18</sub>O<sub>5</sub>+H<sup>+</sup>: 267.1227, Found: 267.1222. **IR** (neat, cm<sup>-1</sup>): ν 2840, 1723, 1601, 1583, 1465, 1240, 1131, 727, 647.

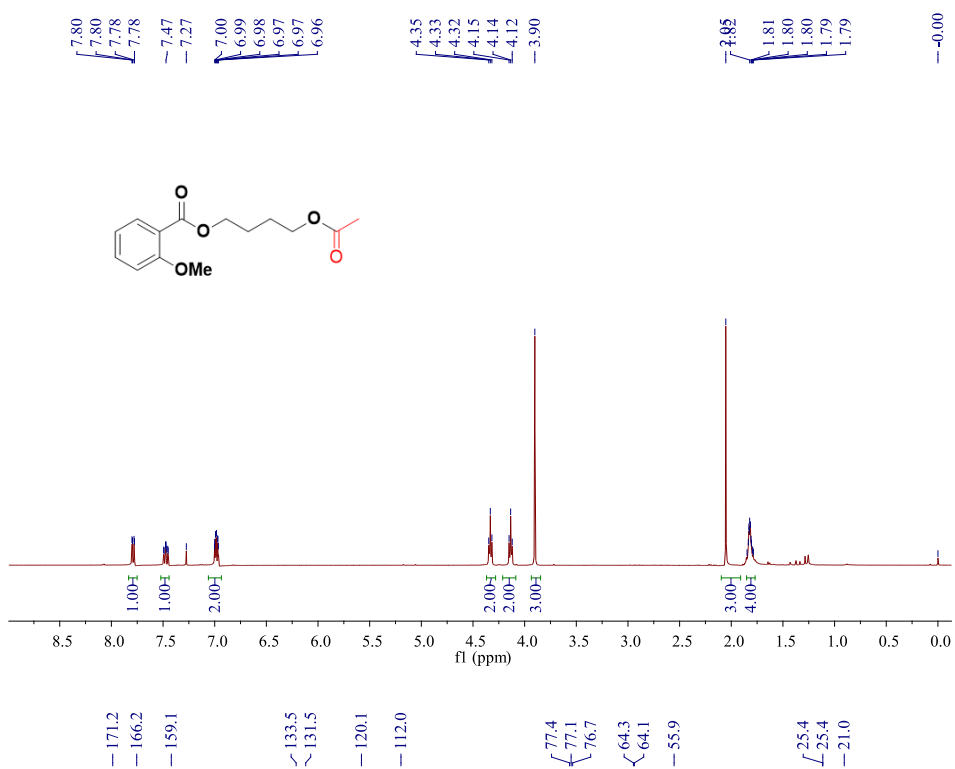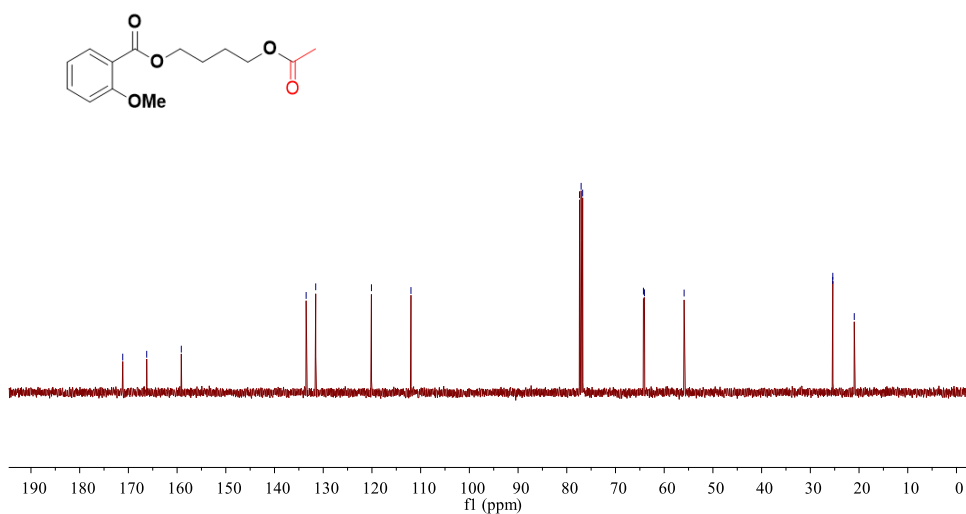

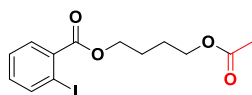

#### 4-Acetoxybutyl 2-iodobenzoate (3aj)

petroleum ether / ethyl acetate = 10:1, colorless oil, 76% yield (55.0 mg). **<sup>1</sup>H NMR** (400 MHz, CDCl<sub>3</sub>) δ 8.00 – 7.98 (m, 1H), 7.80 – 7.78 (m, 1H), 7.43 – 7.39 (m, 1H), 7.18 – 7.13 (m, 1H), 4.37 (t, *J* = 6.2 Hz, 2H), 4.14 (t, *J* = 6.2 Hz, 2H), 2.06 (s, 3H), 1.87 – 1.78 (m, 4H). **<sup>13</sup>C NMR** (100 MHz, CDCl<sub>3</sub>) δ 171.0, 166.5, 141.2, 135.2, 132.5, 130.8, 127.8, 93.9, 65.1, 63.8, 25.3, 25.2, 20.9. **HRMS** (ESI-TOF): Anal Calcd. For. C<sub>13</sub>H<sub>15</sub>IO<sub>4</sub>+H<sup>+</sup>: 363.0088, Found: 363.0082. **IR** (neat, cm<sup>-1</sup>): ν 2853, 1724, 1583, 1463, 1388, 1234, 1014, 740, 606.

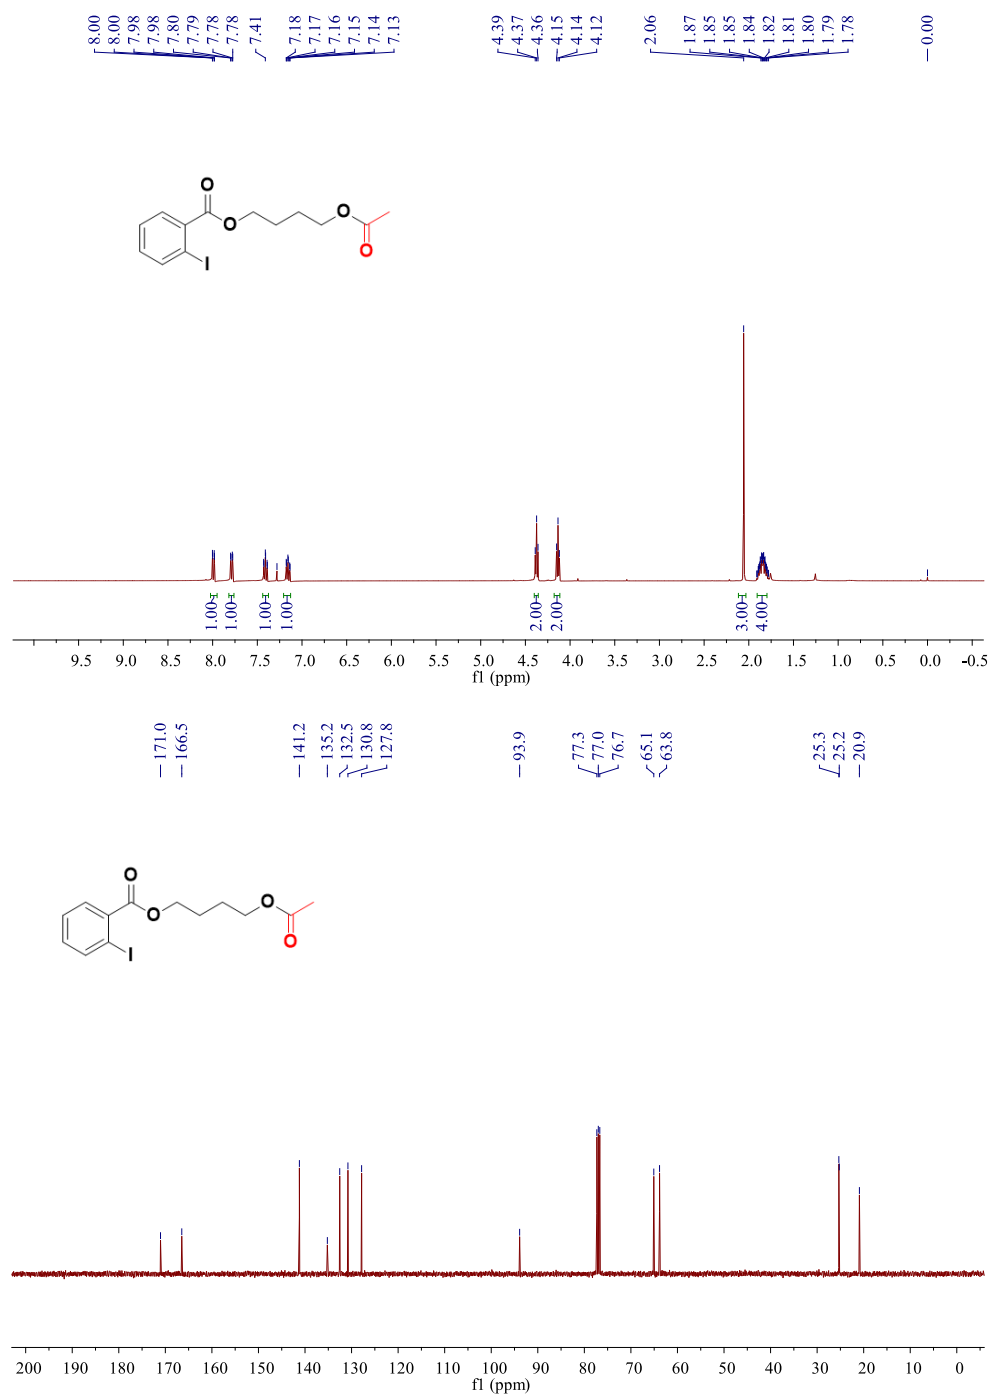

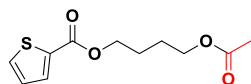

#### 4-Acetoxybutyl thiophene-2-carboxylate (3ak)

petroleum ether / ethyl acetate = 10:1, yellow oil, 63% yield (30.6 mg). **<sup>1</sup>H NMR** (400 MHz, CDCl<sub>3</sub>) δ 7.81 (dd, *J* = 3.7, 1.2 Hz, 1H), 7.56 (dd, *J* = 5.0, 1.2 Hz, 1H), 7.11 (dd, *J* = 5.0, 3.7 Hz, 1H), 4.33 (t, *J* = 6.2 Hz, 2H), 4.14 (t, *J* = 6.2 Hz, 2H), 2.06 (s, 3H), 1.83 – 1.74 (m, 4H). **<sup>13</sup>C NMR** (100 MHz, CDCl<sub>3</sub>) δ 171.1, 162.2, 133.7, 133.4, 132.3, 127.7, 64.5, 63.9, 25.4, 25.3, 20.9. **HRMS** (ESI-TOF): Anal Calcd. For. C<sub>11</sub>H<sub>14</sub>O<sub>4</sub>S+H<sup>+</sup>: 243.0686, Found: 243.0684. **IR** (neat, cm<sup>-1</sup>): ν 2855, 1735, 1525, 1450, 1386, 1257, 1076, 948, 750, 635.

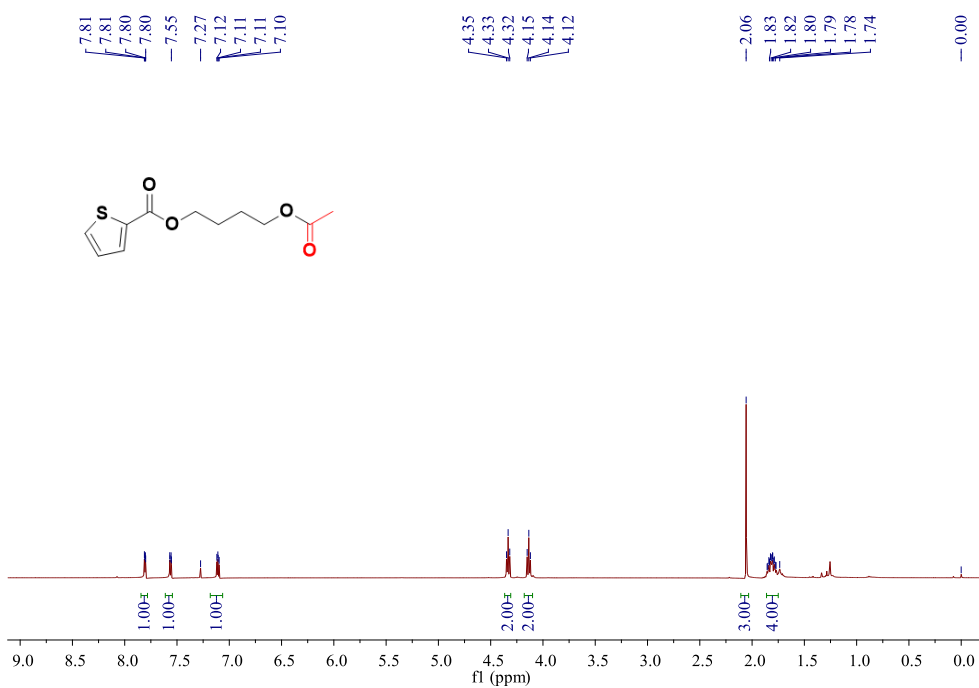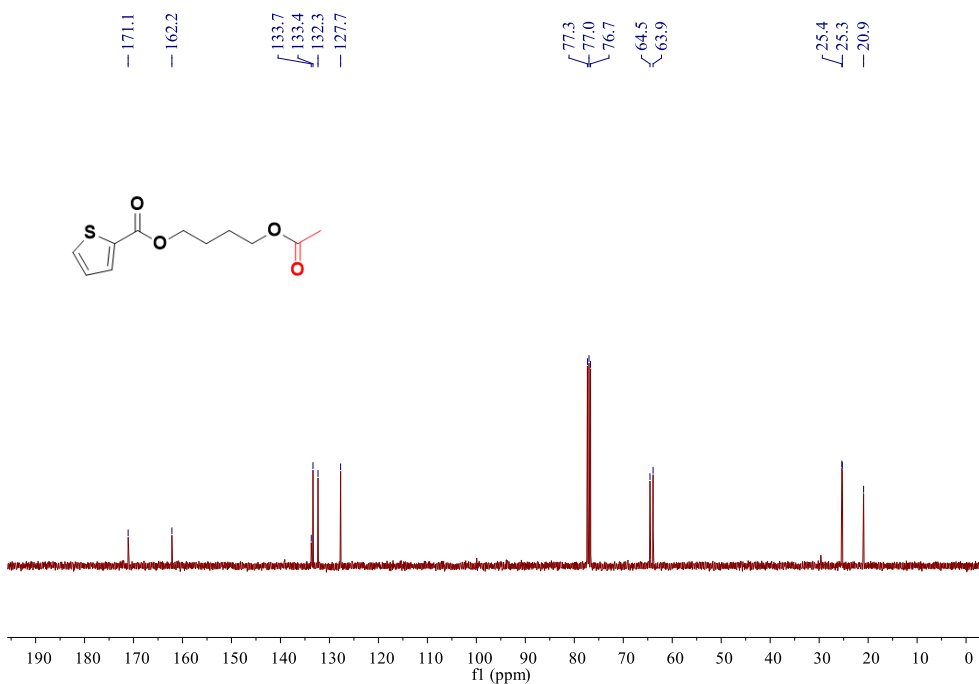

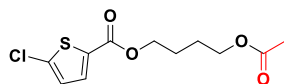

#### 4-Acetoxybutyl 5-chlorothiophene-2-carboxylate (3a)

petroleum ether / ethyl acetate = 10:1, yellow oil, 70% yield (38.4 mg).  $^1\text{H NMR}$  (400 MHz,  $\text{CDCl}_3$ )  $\delta$  7.59 (d,  $J = 4.0$  Hz, 1H), 6.93 (d,  $J = 4.0$  Hz, 1H), 4.31 (t,  $J = 6.2$  Hz, 2H), 4.12 (t,  $J = 6.2$  Hz, 2H), 2.06 (s, 3H), 1.82 – 1.73 (m, 4H).  $^{13}\text{C NMR}$  (100 MHz,  $\text{CDCl}_3$ )  $\delta$  171.0, 161.1, 137.3, 132.9, 131.8, 127.2, 64.8, 63.8, 25.3, 25.2, 20.9. **HRMS** (ESI-TOF): Anal Calcd. For.  $\text{C}_{11}\text{H}_{13}^{35}\text{ClO}_4\text{S}+\text{H}^+$ : 277.0296, Found: 277.0294; Anal Calcd. For.  $\text{C}_{11}\text{H}_{13}^{37}\text{ClO}_4\text{S}+\text{H}^+$ : 279.0266, Found: 279.0264. **IR** (neat,  $\text{cm}^{-1}$ ):  $\nu$  3103, 2854, 1736, 1536, 1423, 1233, 1058, 916, 811, 743, 606.

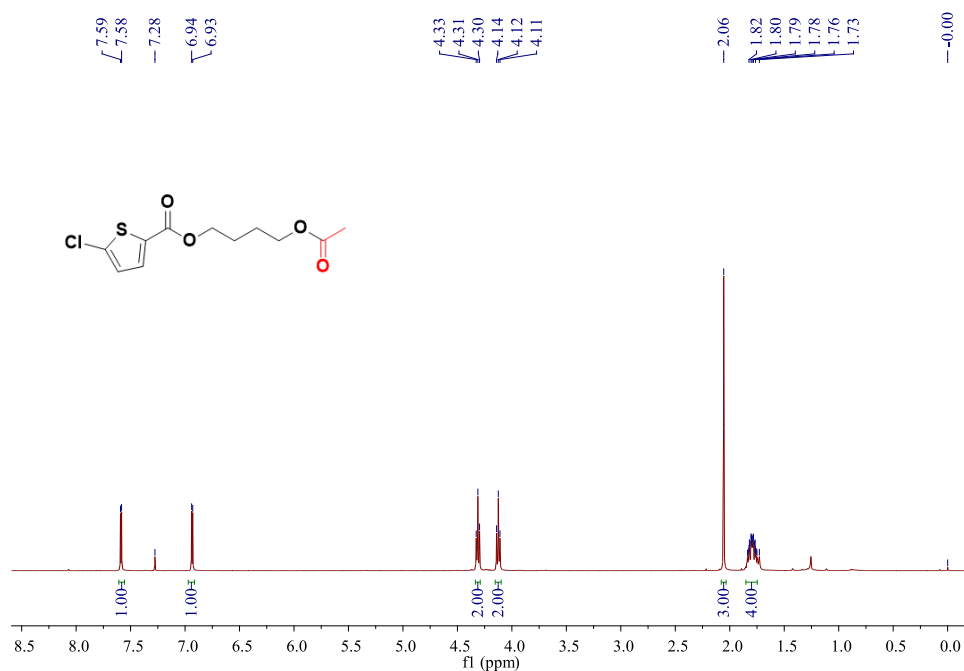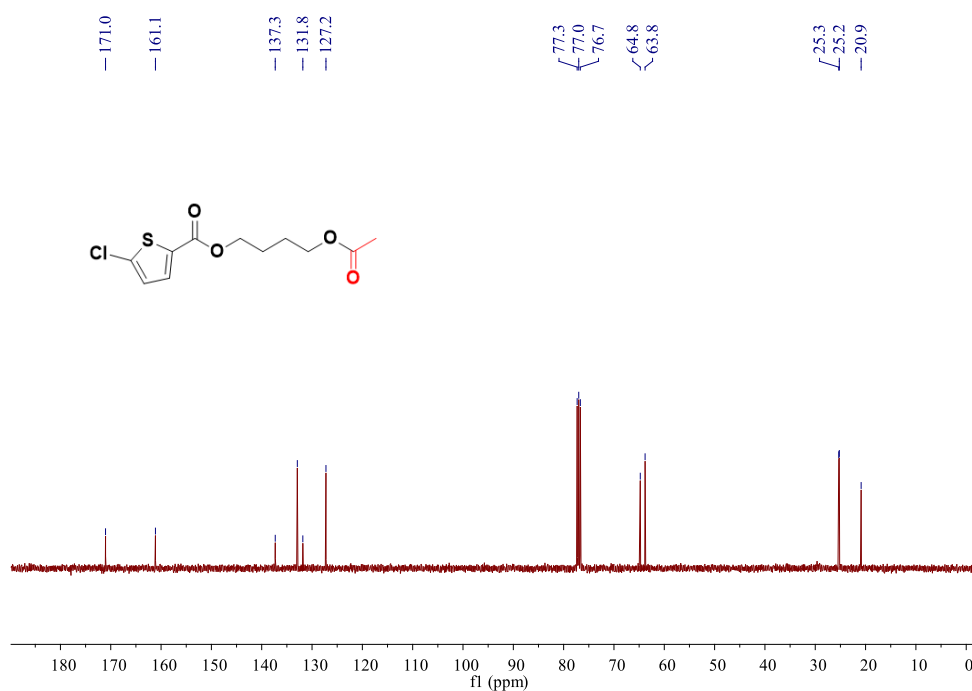



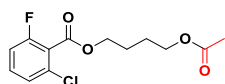

#### 4-Acetoxybutyl 2-chloro-6-fluorobenzoate (3am)

petroleum ether / ethyl acetate = 10:1, yellow oil, 92% yield (53.0 mg).  $^1\text{H NMR}$  (400 MHz,  $\text{CDCl}_3$ )  $\delta$  7.37 – 7.31 (m, 1H), 7.23 – 7.2 (m, 1H), 7.08 – 7.03 (m, 1H), 4.42 (t,  $J = 6.2$  Hz, 2H), 4.12 (t,  $J = 6.2$  Hz, 2H), 2.05 (s, 1H), 1.83 – 1.75 (m, 1H).  $^{13}\text{C NMR}$  (100 MHz,  $\text{CDCl}_3$ )  $\delta$  171.0, 163.1, 159.7 (d,  $J = 253.3$  Hz), 132.3 (d,  $J = 5.0$  Hz), 131.5 (d,  $J = 9.1$  Hz), 125.5 (d,  $J = 3.5$  Hz), 122.5 (d,  $J = 20.4$  Hz), 114.4 (d,  $J = 21.5$  Hz), 65.6, 63.8, 25.2, 25.1, 20.9.  $^{19}\text{F NMR}$  (377 MHz,  $\text{CDCl}_3$ )  $\delta$  -112.2 (s, 1F). **HRMS** (ESI-TOF): Anal Calcd. For.  $\text{C}_{13}\text{H}_{14}^{35}\text{ClFO}_4 + \text{H}^+$ : 289.0637, Found: 289.0634; Anal Calcd. For.  $\text{C}_{13}\text{H}_{14}^{37}\text{ClFO}_4 + \text{H}^+$ : 291.0608, Found: 291.0605. **IR** (neat,  $\text{cm}^{-1}$ ):  $\nu$  2856, 1732, 1602, 1576, 1450, 1387, 1268, 1055, 901, 787, 634.

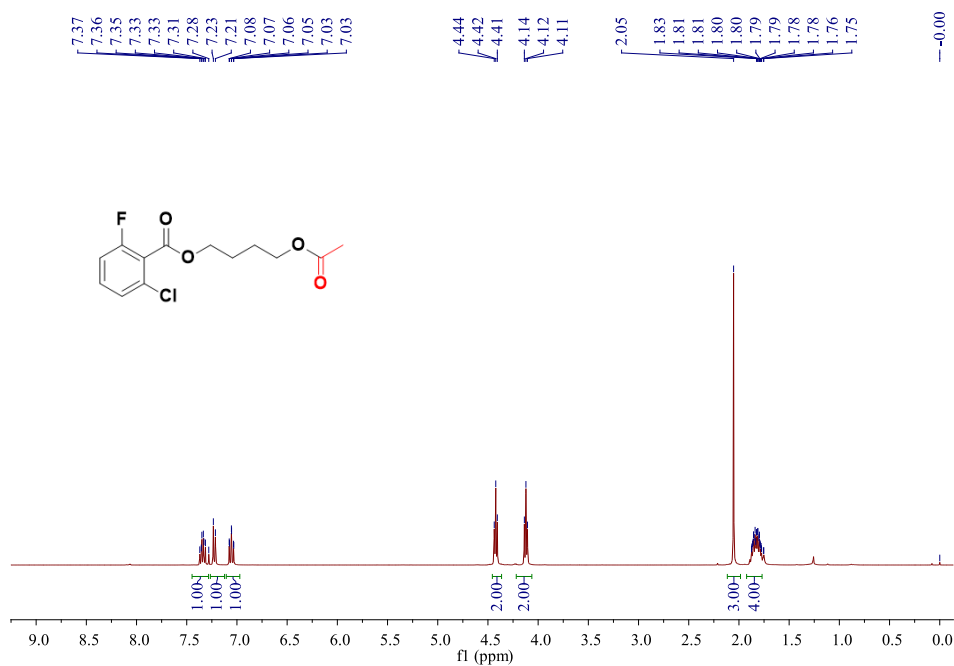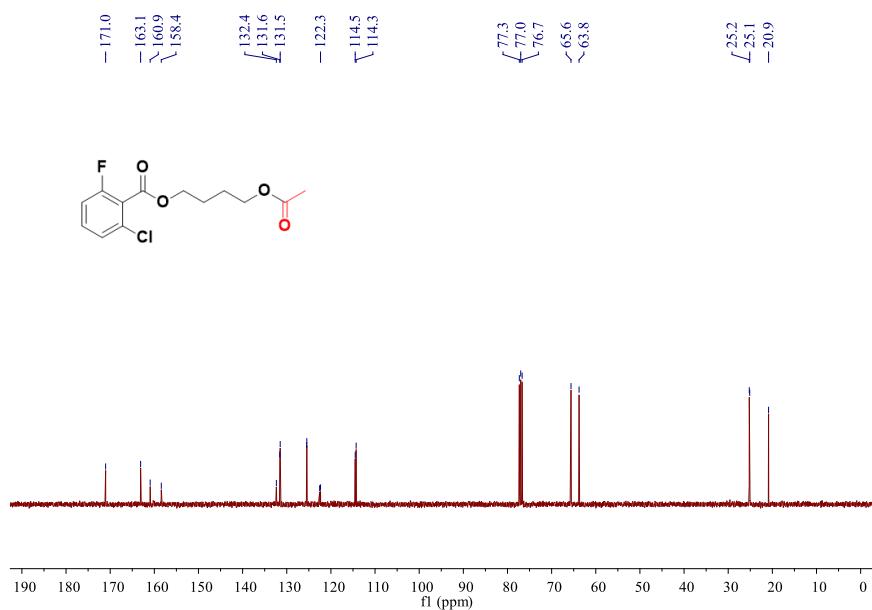

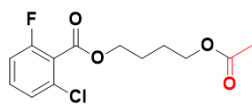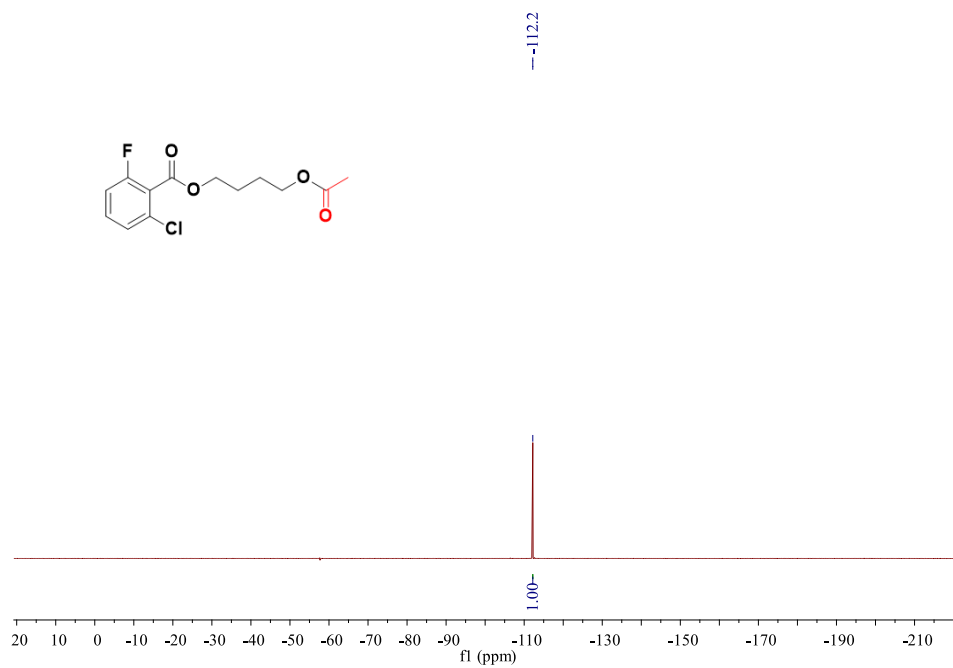

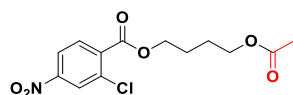

### 3-Acetoxypropyl 2-chloro-4-nitrobenzoate (3an)

petroleum ether / ethyl acetate = 10:1, yellow oil, 88% yield (52.8 mg). **<sup>1</sup>H NMR** (400 MHz, CDCl<sub>3</sub>) δ 8.32 (d, *J* = 2.1 Hz, 1H), 8.17 (dd, *J* = 8.6, 2.1 Hz, 1H), 7.97 (d, *J* = 8.6 Hz, 1H), 4.43 (t, *J* = 6.2 Hz, 2H), 4.14 (t, *J* = 6.2 Hz, 2H), 2.06 (s, 3H), 1.85 – 1.78 (m, 4H). **<sup>13</sup>C NMR** (100 MHz, CDCl<sub>3</sub>) δ 171.0, 164.2, 149.4, 135.9, 134.6, 131.9, 125.9, 121.4, 65.9, 63.7, 25.2, 25.2, 20.8. **HRMS** (ESI-TOF): Anal Calcd. For. C<sub>13</sub>H<sub>14</sub><sup>35</sup>ClNO<sub>6</sub>+Na<sup>+</sup>: 338.0402, Found: 338.0400; Anal Calcd. For. C<sub>13</sub>H<sub>14</sub><sup>37</sup>ClNO<sub>6</sub>+Na<sup>+</sup>: 340.0372, Found: 340.0370. **IR** (neat, cm<sup>-1</sup>): ν 2853, 1731, 1600, 1589, 1349, 1236, 1044, 806, 731.

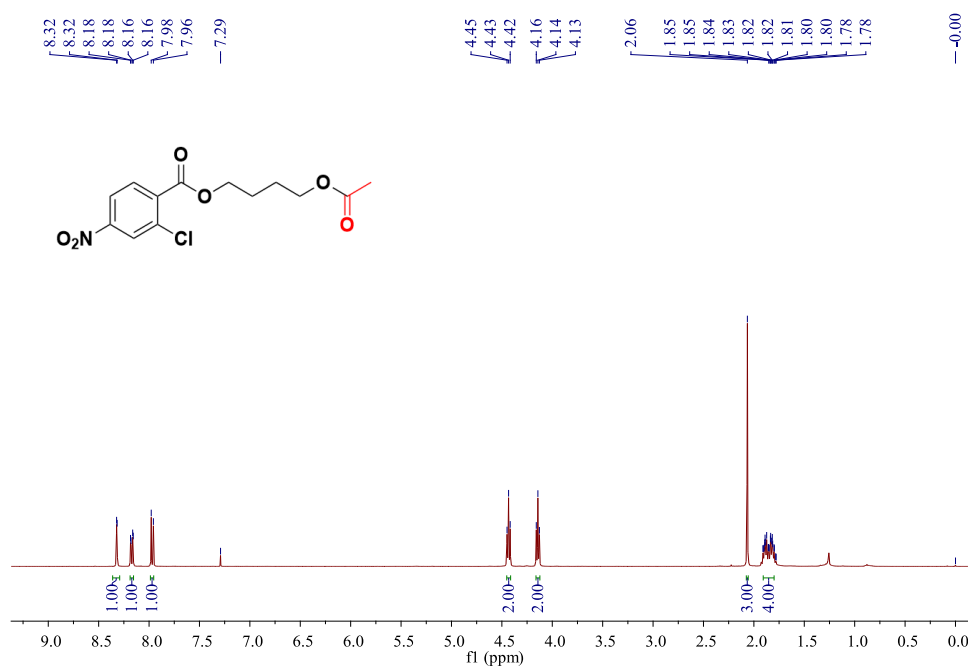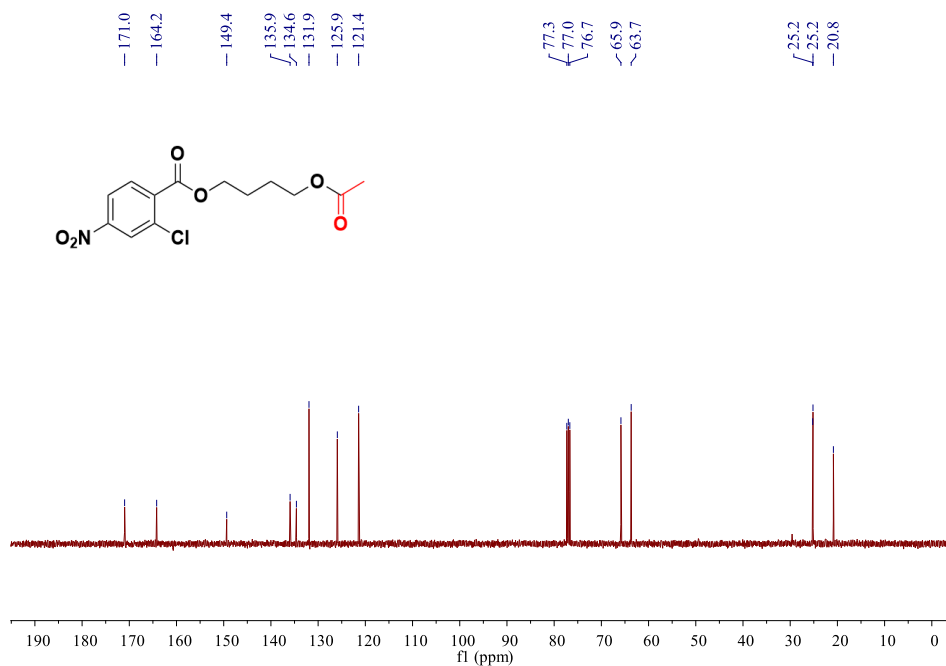

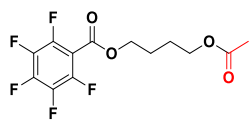

#### 4-Acetoxybutyl 2,3,4,5,6-pentafluorobenzoate (3a)

petroleum ether / ethyl acetate = 10:1, yellow oil, 75% yield (48.9 mg).  $^1\text{H NMR}$  (400 MHz,  $\text{CDCl}_3$ )  $\delta$  4.43 (t,  $J = 6.2$  Hz, 2H), 4.13 (t,  $J = 6.2$  Hz, 2H), 2.06 (s, 3H), 1.82 – 1.77 (m, 4H).  $^{13}\text{C NMR}$  (100 MHz,  $\text{CDCl}_3$ )  $\delta$  170.7, 158.6, 145.2 (m), 142.9 (m), 137.5 (m), 108.1 (m), 66.0, 63.4, 25.0, 24.9, 20.4.

$^{19}\text{F NMR}$  (377 MHz,  $\text{CDCl}_3$ )  $\delta$  -138.4 – -138.5 (m, 2F), -148.7 – -148.8 (m, 1F), -160.4 – -160.5 (m, 2F). **HRMS** (ESI-TOF): Anal Calcd. For.  $\text{C}_{13}\text{H}_{11}\text{F}_5\text{O}_4 + \text{Na}^+$ : 349.0470, Found: 349.0466. **IR** (neat,  $\text{cm}^{-1}$ ):  $\nu$  2859, 1736, 1652, 1524, 1496, 1387, 1222, 1038, 754, 699.

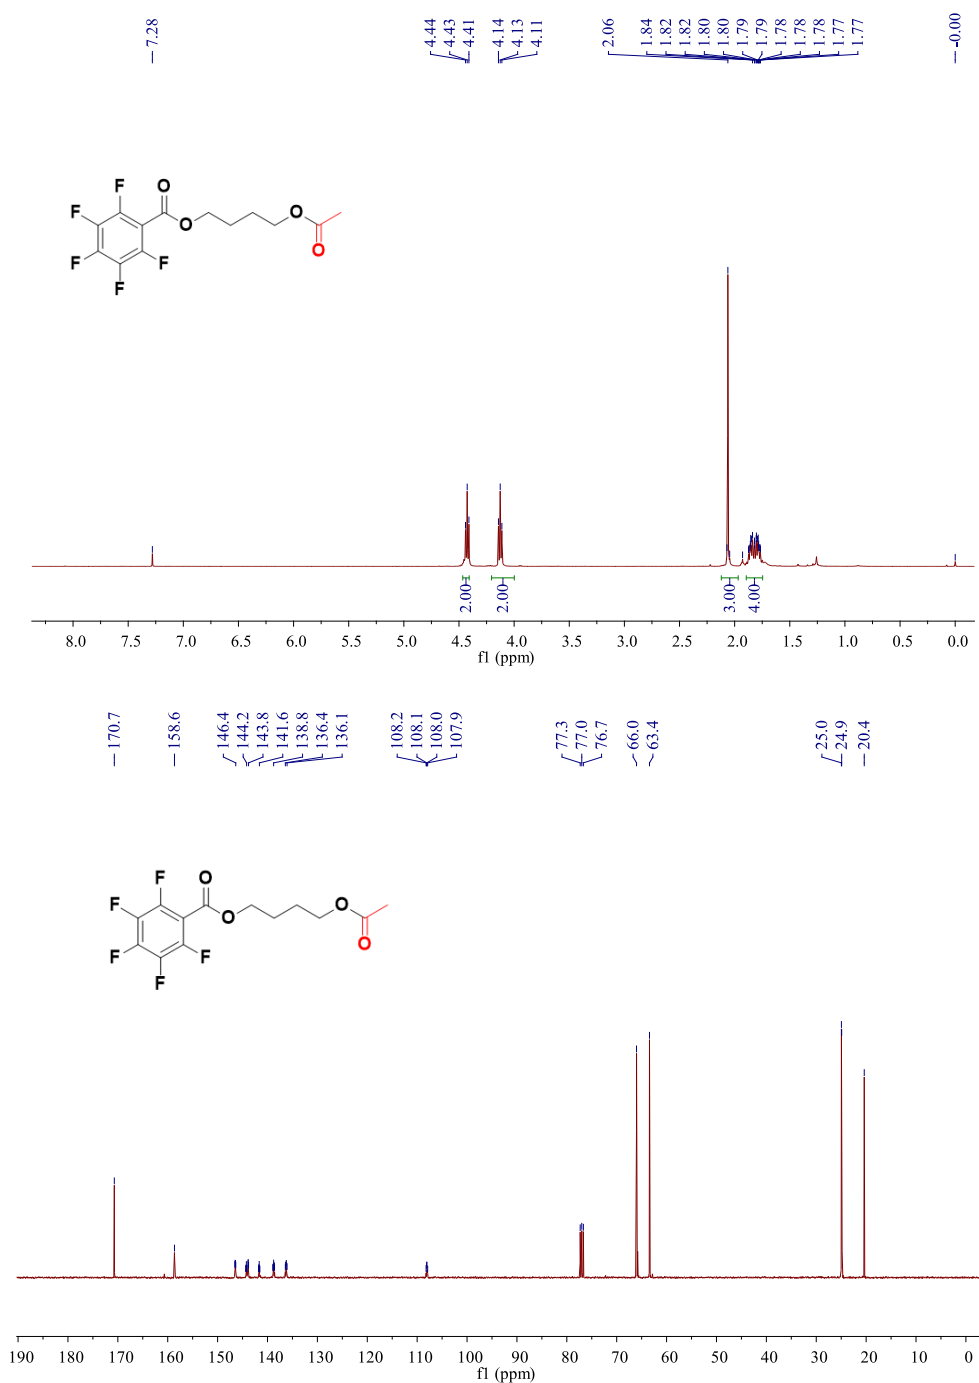

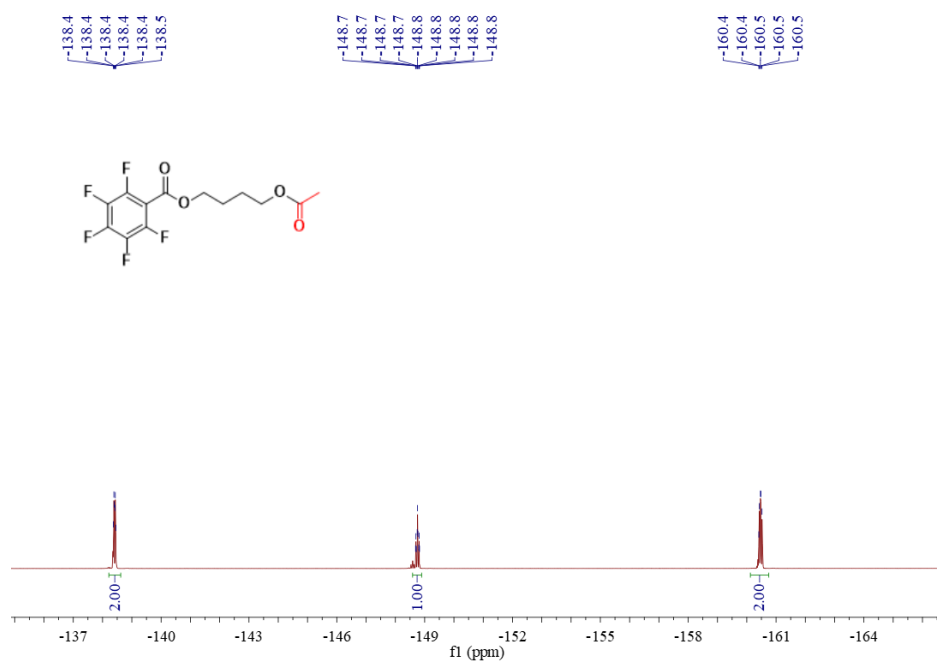

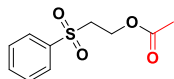

### 2-(Phenylsulfonyl)ethyl acetate (3ap)

petroleum ether / ethyl acetate = 5:1, colorless oil, 99% yield (45.2 mg).  $^1\text{H NMR}$  (400 MHz,  $\text{CDCl}_3$ )  $\delta$  7.94 – 7.92 (m, 2H), 7.70 – 7.67 (m, 1H), 7.61 – 7.57 (m, 2H), 4.40 (t,  $J = 6.1$  Hz, 2H), 3.48 (t,  $J = 6.1$  Hz, 2H), 1.82 (s, 3H).  $^{13}\text{C NMR}$  (100 MHz,  $\text{CDCl}_3$ )  $\delta$  170.1, 139.3, 133.9, 129.2, 128.0, 57.5, 54.9, 20.3. **HRMS** (ESI-TOF): Anal Calcd. For.  $\text{C}_{10}\text{H}_{12}\text{O}_4\text{S} + \text{H}^+$ : 229.0529, Found: 229.0525. **IR** (neat,  $\text{cm}^{-1}$ ):  $\nu$  2900, 1605, 1580, 1350, 1251, 750.

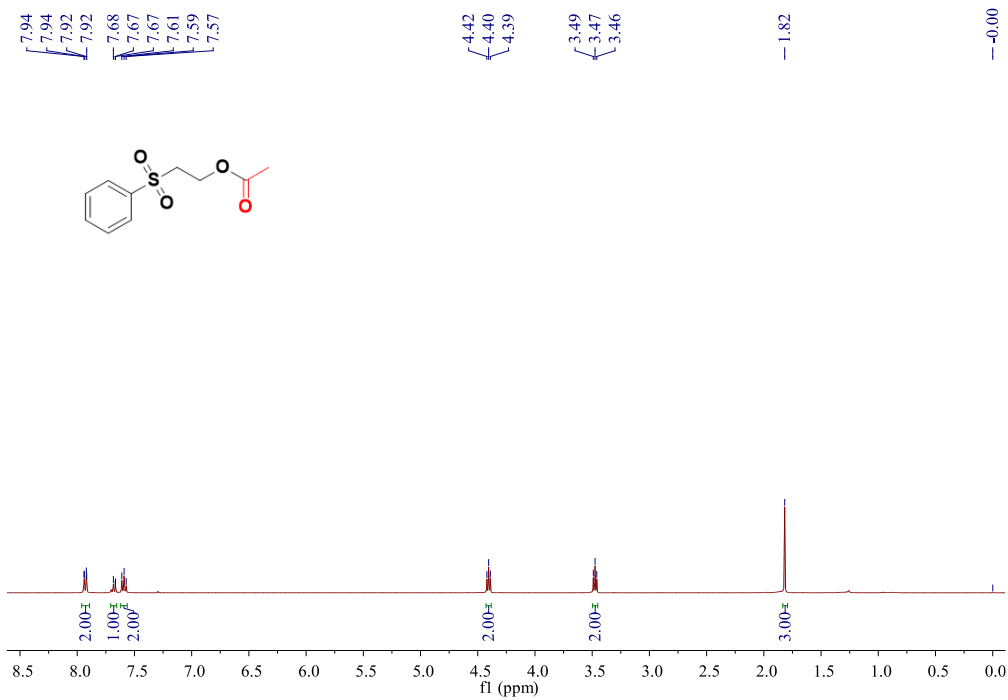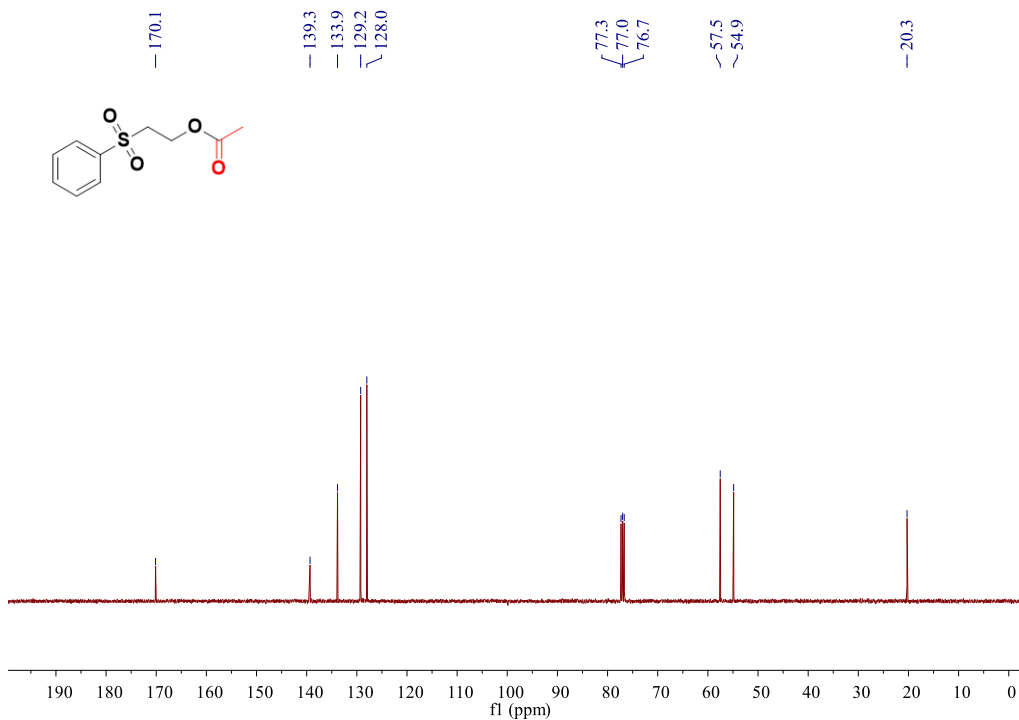

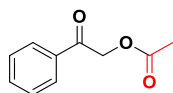

### 2-Oxo-2-phenylethyl acetate (3aq)

petroleum ether / ethyl acetate = 10:1, yellow oil, 50% yield (33.5 mg). **<sup>1</sup>H NMR** (400 MHz, CDCl<sub>3</sub>) δ 7.93 – 7.91 (m, 1H), 7.63 – 7.59 (m, 1H), 7.51 – 7.47 (m, 2H), 5.35 (s, 2H), 2.24 (s, 3H). **<sup>13</sup>C NMR** (100 MHz, CDCl<sub>3</sub>) δ 192.1, 170.4, 134.1, 133.9, 128.8, 127.7, 66.0, 20.6. **HRMS** (ESI-TOF): Anal Calcd. For. C<sub>10</sub>H<sub>10</sub>O<sub>3</sub>+H<sup>+</sup>: 179.0703, Found: 179.0701. **IR** (neat, cm<sup>-1</sup>): ν 2849, 1748, 1702, 1597, 1450, 1372, 1216, 912, 731, 647.

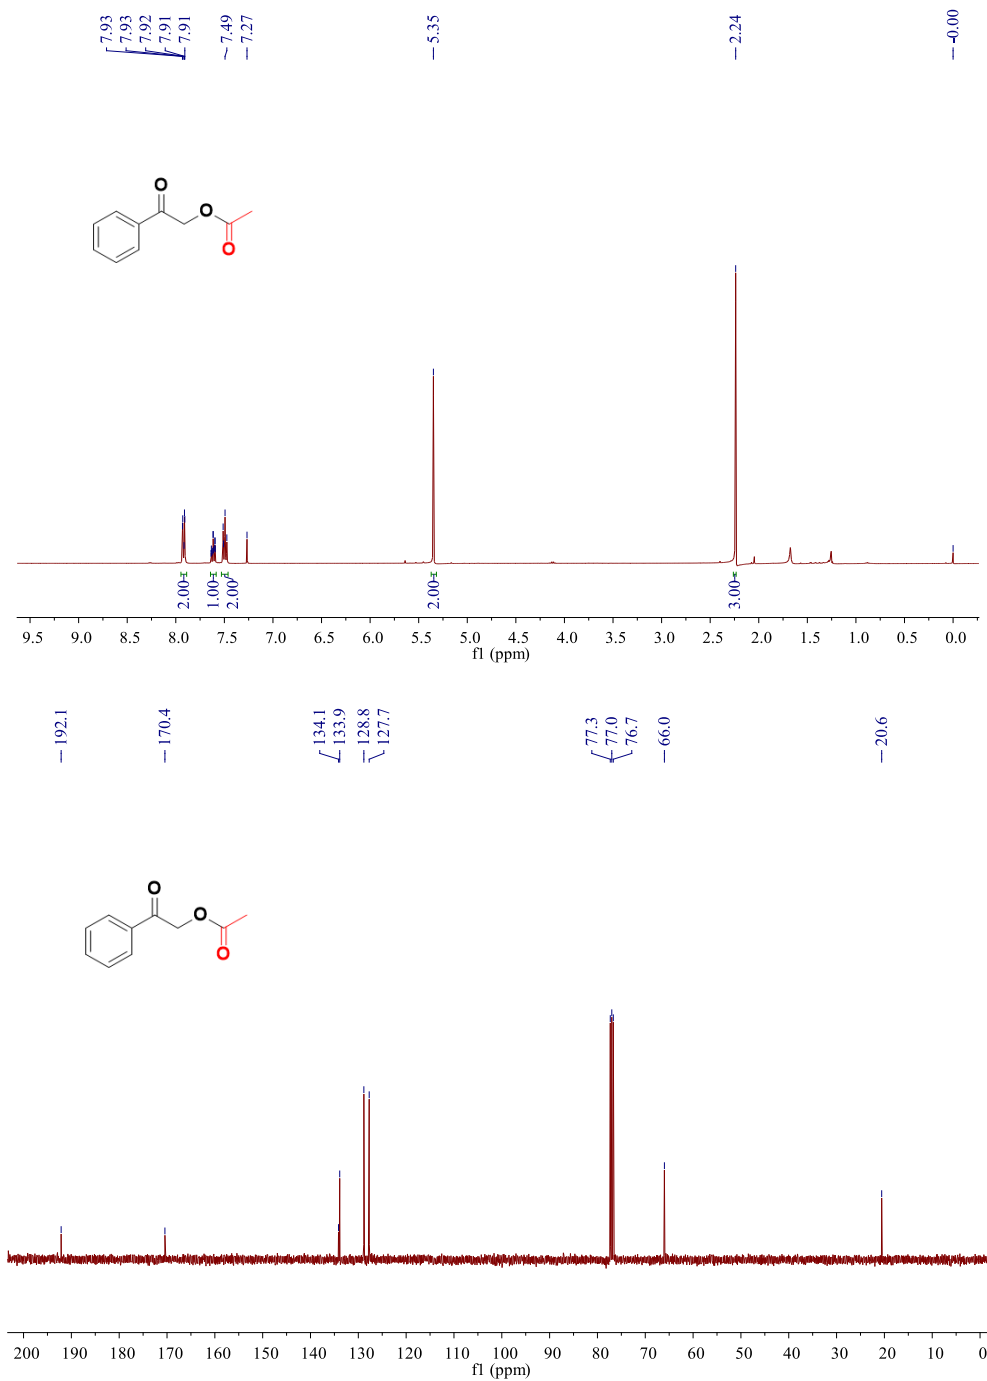

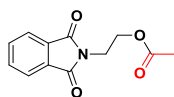

**2-(1,3-Dioxisoindolin-2-yl)ethyl acetate (3ar)**

petroleum ether / ethyl acetate = 5:1, white solid, 97% yield (45.1 mg). mp: 77 – 80°C. <sup>1</sup>H NMR (400 MHz, CDCl<sub>3</sub>) δ 7.89 – 7.85 (m, 2H), 7.77 – 7.72 (m, 2H), 4.32 (t, *J* = 5.3 Hz, 2H), 3.97 (t, *J* = 5.3 Hz, 2H), 2.03 (s, 3H). <sup>13</sup>C NMR (100 MHz, CDCl<sub>3</sub>) δ 170.8, 168.0, 134.0, 131.9, 123.3, 61.5, 37.0, 20.7. HRMS (ESI-TOF): Anal Calcd. For. C<sub>12</sub>H<sub>11</sub>NO<sub>4</sub>+H<sup>+</sup>: 234.0761, Found: 234.0758. IR (neat, cm<sup>-1</sup>): ν 5825, 1772, 1705, 1615, 1559, 1369, 1273, 1153, 983, 717.

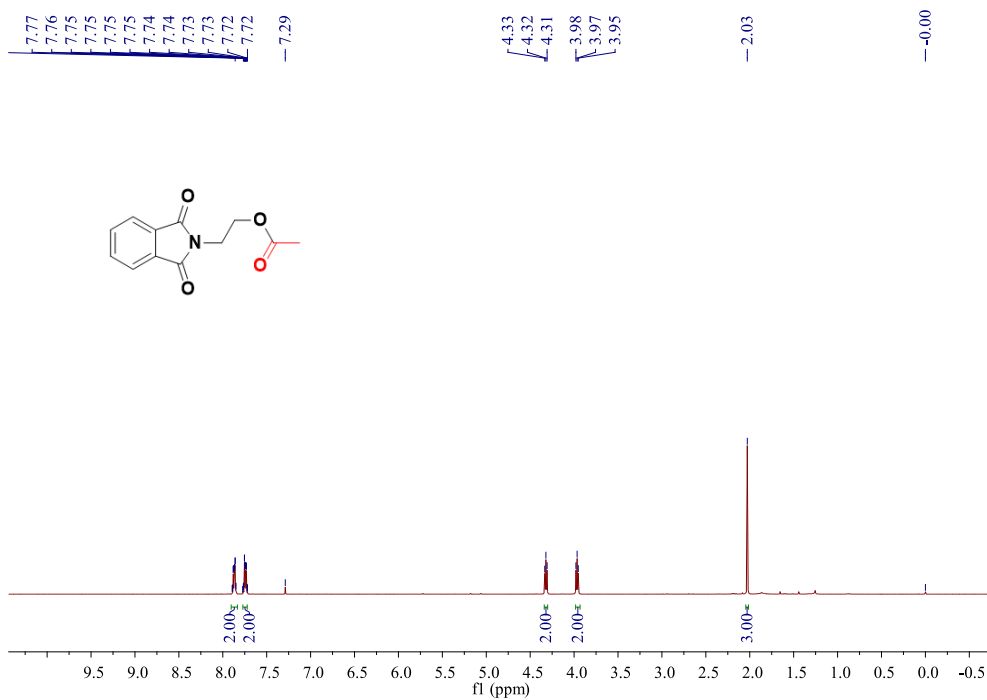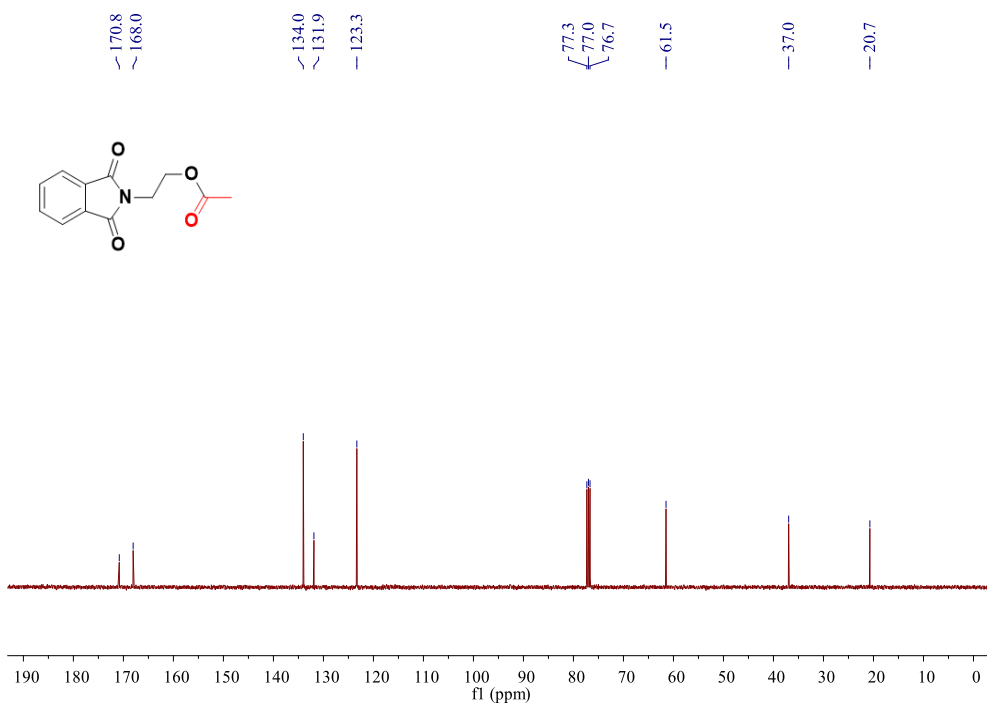



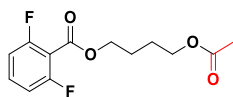

#### 4-Acetoxybutyl 2,6-difluorobenzoate (3as)

petroleum ether / ethyl acetate = 10:1, yellow oil, 82% yield (44.5 mg). **<sup>1</sup>H NMR** (400 MHz, CDCl<sub>3</sub>) δ 7.46 – 7.38 (m, 1H), 6.98 – 6.94 (m, 2H), 4.40 (t, *J* = 6.1 Hz, 2H), 4.13 (t, *J* = 6.1 Hz, 2H), 2.06 (s, 3H), 1.85 – 1.73 (m, 7H). **<sup>13</sup>C NMR** (100 MHz, CDCl<sub>3</sub>) δ 171.1, 161.7 (d, *J* = 39.2 Hz), 159.3 (d, *J* = 6.2 Hz), 132.7 (t, *J* = 10.5 Hz), 112.0 (dd, *J* = 24.3, 1.3 Hz), 65.4, 63.8, 25.2, 25.1, 20.9. **<sup>19</sup>F NMR** (377 MHz, CDCl<sub>3</sub>) δ -110.5 (s, 2F). **HRMS** (ESI-TOF): Anal Calcd. For. C<sub>13</sub>H<sub>14</sub>F<sub>2</sub>O<sub>4</sub>+H<sup>+</sup>: 273.0933, Found: 273.0930. **IR** (neat, cm<sup>-1</sup>): ν 2857, 1730, 1624, 1594, 1469, 1288, 1110, 768, 634.

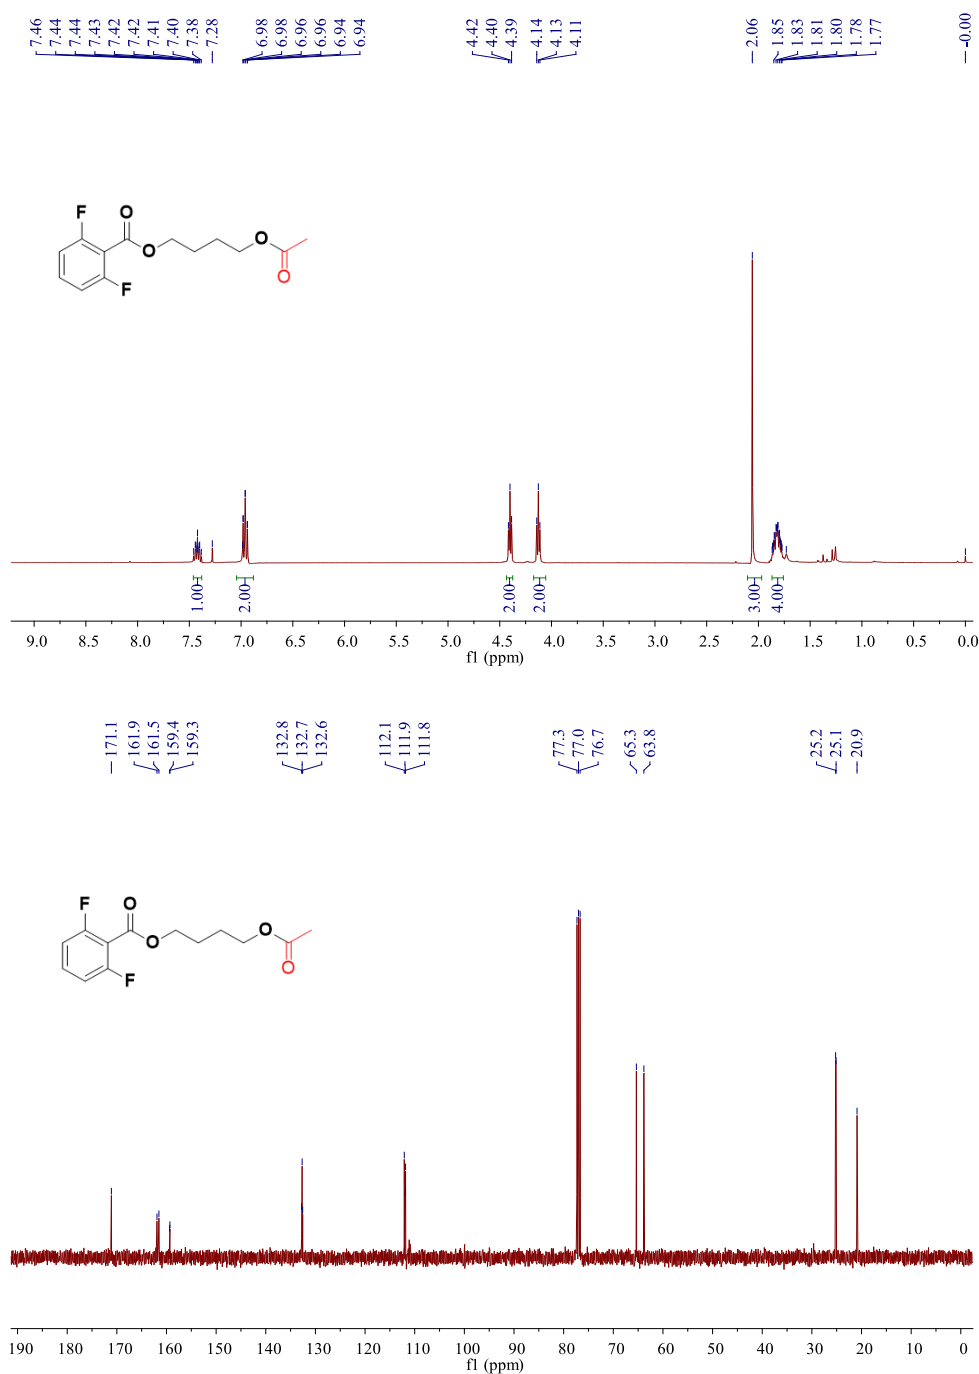

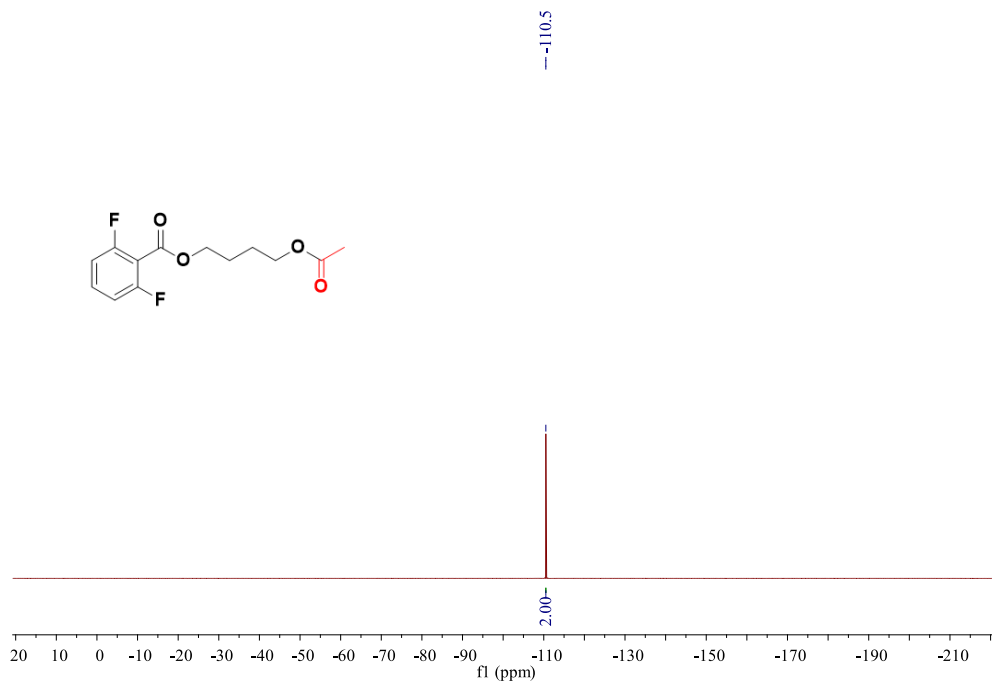

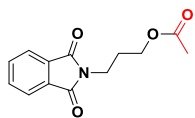

### 3-(1,3-Dioxisoindolin-2-yl)propyl acetate (3at)

petroleum ether / ethyl acetate = 10:1, white solid, 88% yield (46.0 mg). mp: 63 – 66°C.  $^1\text{H NMR}$  (400 MHz,  $\text{CDCl}_3$ )  $\delta$  7.87 – 7.83 (m, 2H), 7.75 – 7.70 (m, 2H), 4.11 (t,  $J = 6.1$  Hz, 2H), 3.81 (t,  $J = 6.1$  Hz, 2H), 2.07 – 2.01 (m, 2H), 2.00 (s, 3H).  $^{13}\text{C NMR}$  (100 MHz,  $\text{CDCl}_3$ )  $\delta$  170.9, 168.2, 133.9, 132.0, 123.2, 61.8, 35.0, 27.4, 20.8. **HRMS** (ESI-TOF): Anal Calcd. For.  $\text{C}_{13}\text{H}_{13}\text{NO}_4 + \text{H}^+$ : 248.0917, Found: 248.0913. **IR** (neat,  $\text{cm}^{-1}$ ):  $\nu$  2900, 1771, 1614, 1527, 1467, 1365, 1188, 1001, 717, 605.

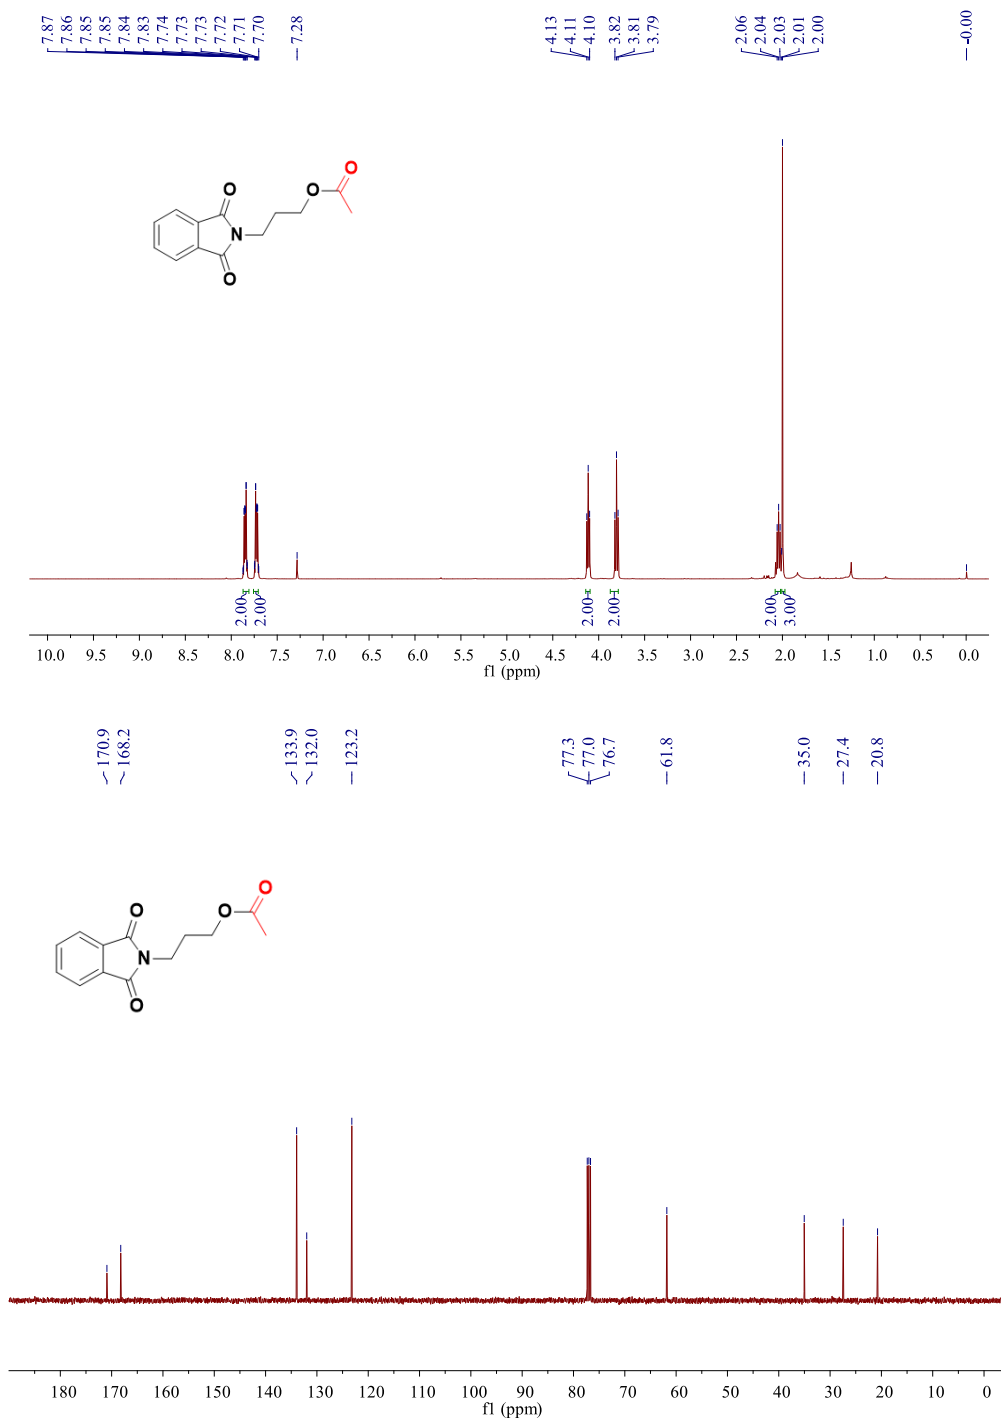

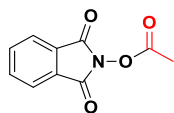

### 1,3-Dioxoisindolin-2-yl acetate (3au)

petroleum ether / ethyl acetate = 5:1, white solid, 61% yield (24.9 mg). mp: 183 – 185°C.  $^1\text{H NMR}$  (400 MHz,  $\text{CDCl}_3$ )  $\delta$  7.92 – 7.87 (m, 2H), 7.82 – 7.78 (m, 2H), 2.41 (s, 1H).  $^{13}\text{C NMR}$  (100 MHz,  $\text{CDCl}_3$ )  $\delta$  166.5, 161.9, 134.7, 128.8, 123.9, 17.6. **HRMS** (ESI-TOF): Anal Calcd. For.  $\text{C}_{10}\text{H}_7\text{NO}_4 + \text{H}^+$ : 206.0448, Found: 206.0450. **IR** (neat,  $\text{cm}^{-1}$ ):  $\nu$  2850, 1808, 1785, 1609, 1466, 1236, 967, 720, 694.

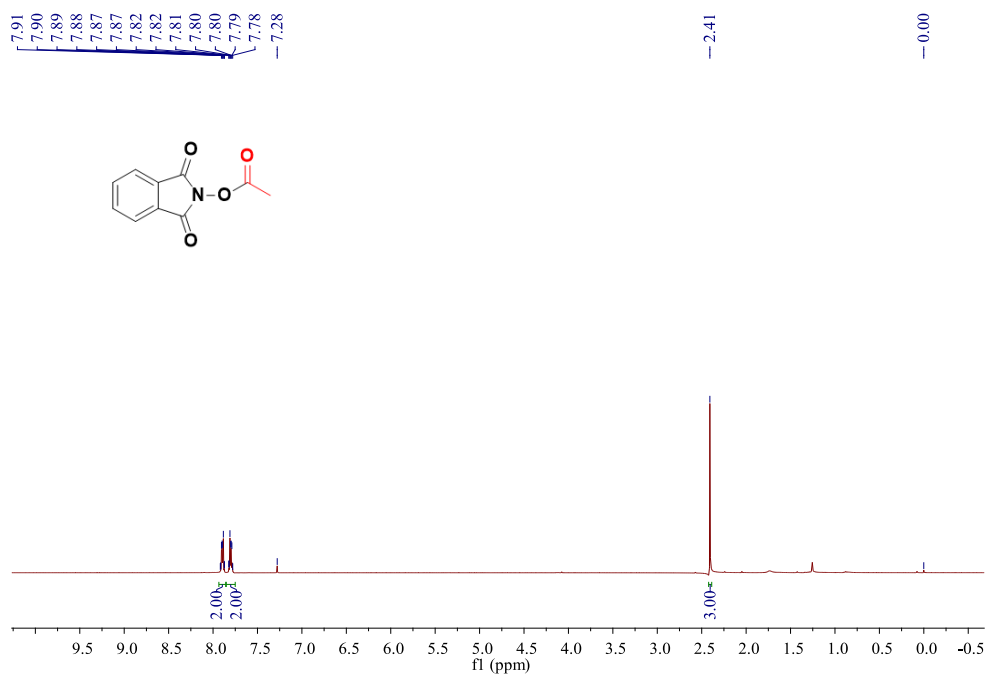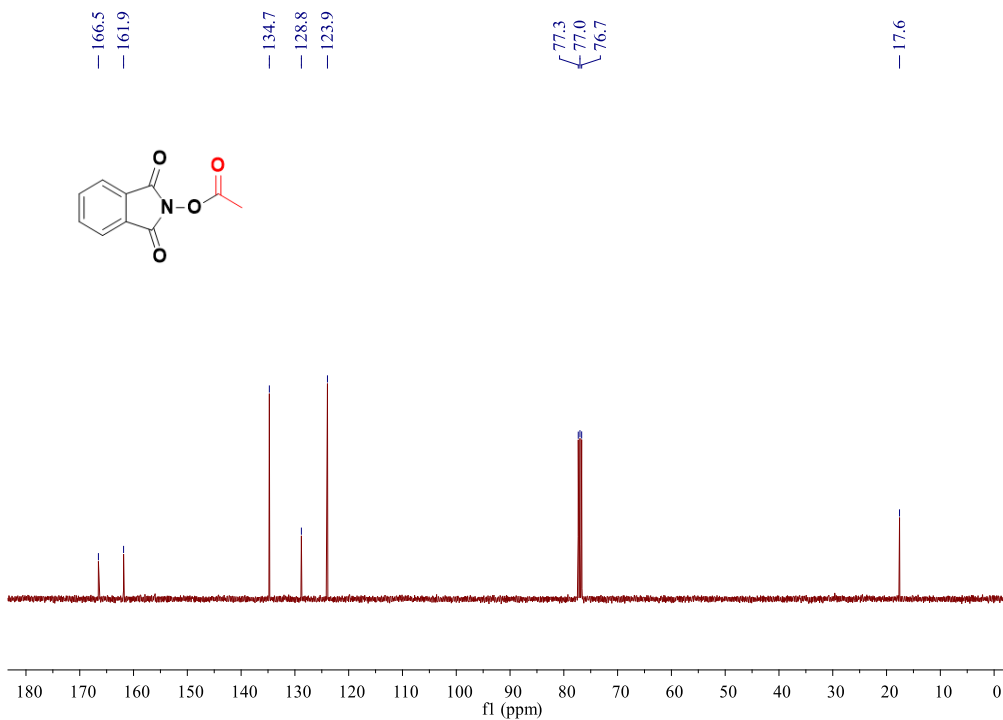

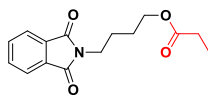

#### 4-(1,3-Dioxisoindolin-2-yl)butyl propionate (3av)

petroleum ether / ethyl acetate = 5:1, yellow liquid, 80% yield (44.0 mg).  $^1\text{H NMR}$  (400 MHz,  $\text{CDCl}_3$ )  $\delta$  7.8 – 7.84 (m, 2H), 7.74 – 7.72 (m, 2H), 4.11 (t,  $J = 6.9$  Hz, 2H), 3.73 (t,  $J = 6.9$  Hz, 2H), 2.32 (q,  $J = 7.6$  Hz, 1H), 1.80 – 1.66 (m, 2H), 1.13 (t,  $J = 7.6$  Hz, 2H).  $^{13}\text{C NMR}$  (100 MHz,  $\text{CDCl}_3$ )  $\delta$  174.3, 168.2, 133.8, 131.9, 123.1, 63.5, 37.4, 27.4, 25.9, 25.1, 9.0. **HRMS** (ESI-TOF): Anal Calcd. For  $\text{C}_{15}\text{H}_{17}\text{NO}_4 + \text{Na}^+$ : 298.1050, Found: 298.1055; **IR** (neat,  $\text{cm}^{-1}$ ):  $\nu$  2859, 1720, 1610, 1555, 1438, 1190, 1008, 719.

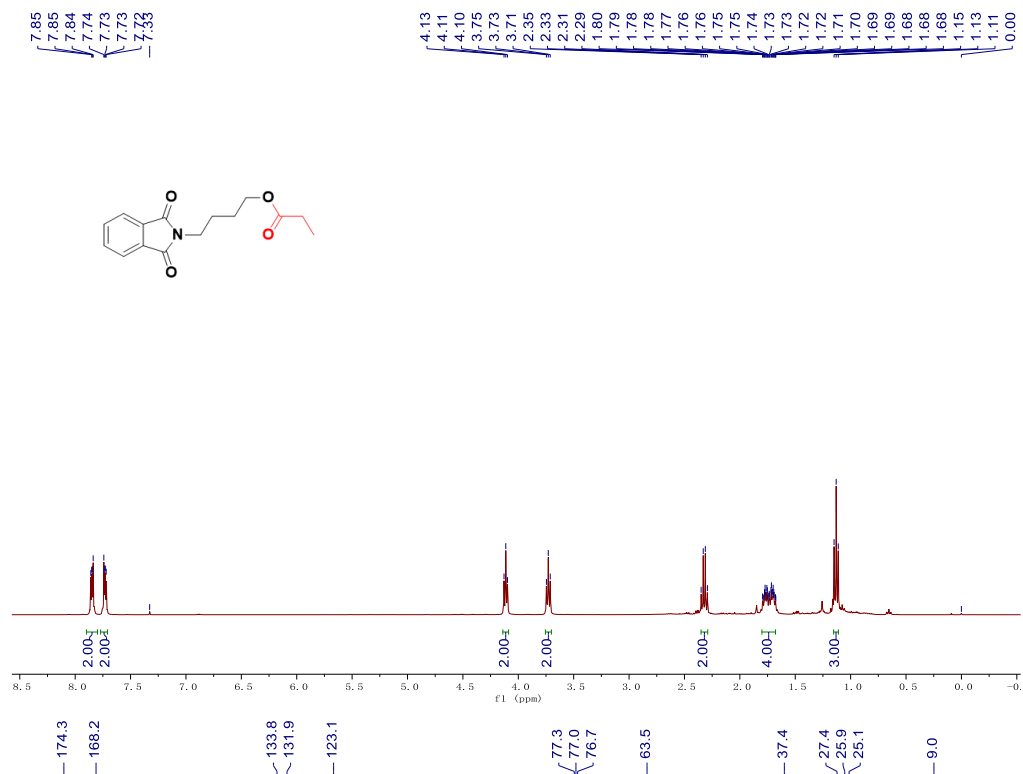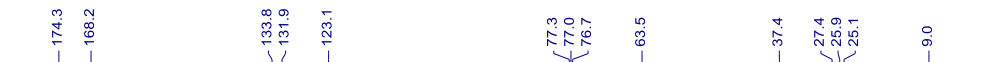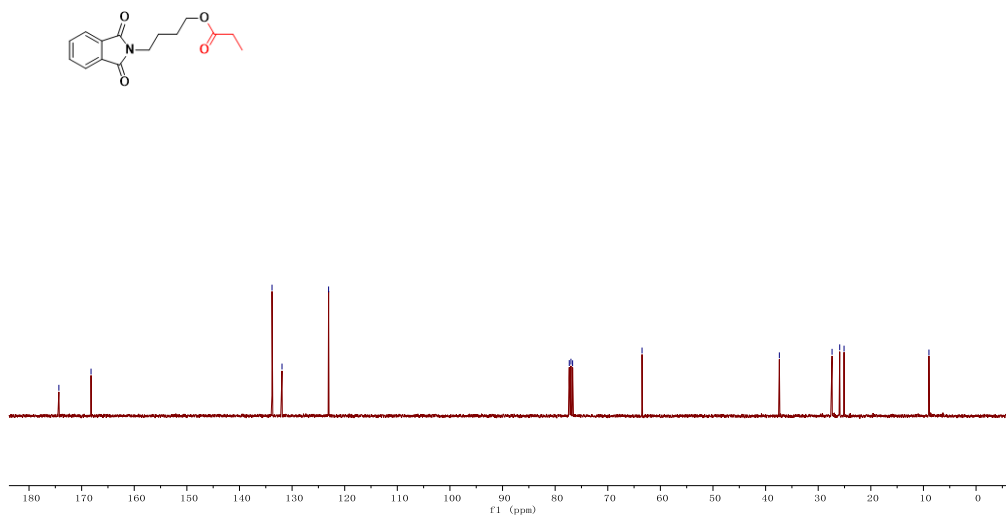

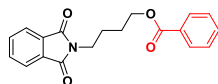

#### 4-(1,3-dioxoisindolin-2-yl)butyl benzoate (3aw)

petroleum ether / ethyl acetate = 5:1, yellow liquid, 30% yield (19.4 mg).  $^1\text{H NMR}$  (400 MHz,  $\text{CDCl}_3$ )  $\delta$  8.05 – 8.00 (m, 2H), 7.87 – 7.83 (m, 2H), 7.74 – 7.70 (m, 2H), 7.57 – 7.53 (m, 1H), 7.45 – 7.41 (m, 2H), 4.37 (t,  $J = 6.6$  Hz, 2H), 3.78 (t,  $J = 6.6$  Hz, 2H), 1.87 – 1.84 (m, 4H).  $^{13}\text{C NMR}$  (100 MHz,  $\text{CDCl}_3$ )  $\delta$  168.4, 166.6, 134.0, 132.9, 132.1, 130.2, 129.6, 128.3, 123.3, 64.3, 37.6, 26.2, 25.4. **HRMS** (ESI-TOF): Anal Calcd. For.  $\text{C}_{19}\text{H}_{17}\text{NO}_4$ : 346.1050, Found: 346.1054; **IR** (neat,  $\text{cm}^{-1}$ ):  $\nu$  2790, 1760, 1610, 1499, 1223, 752.

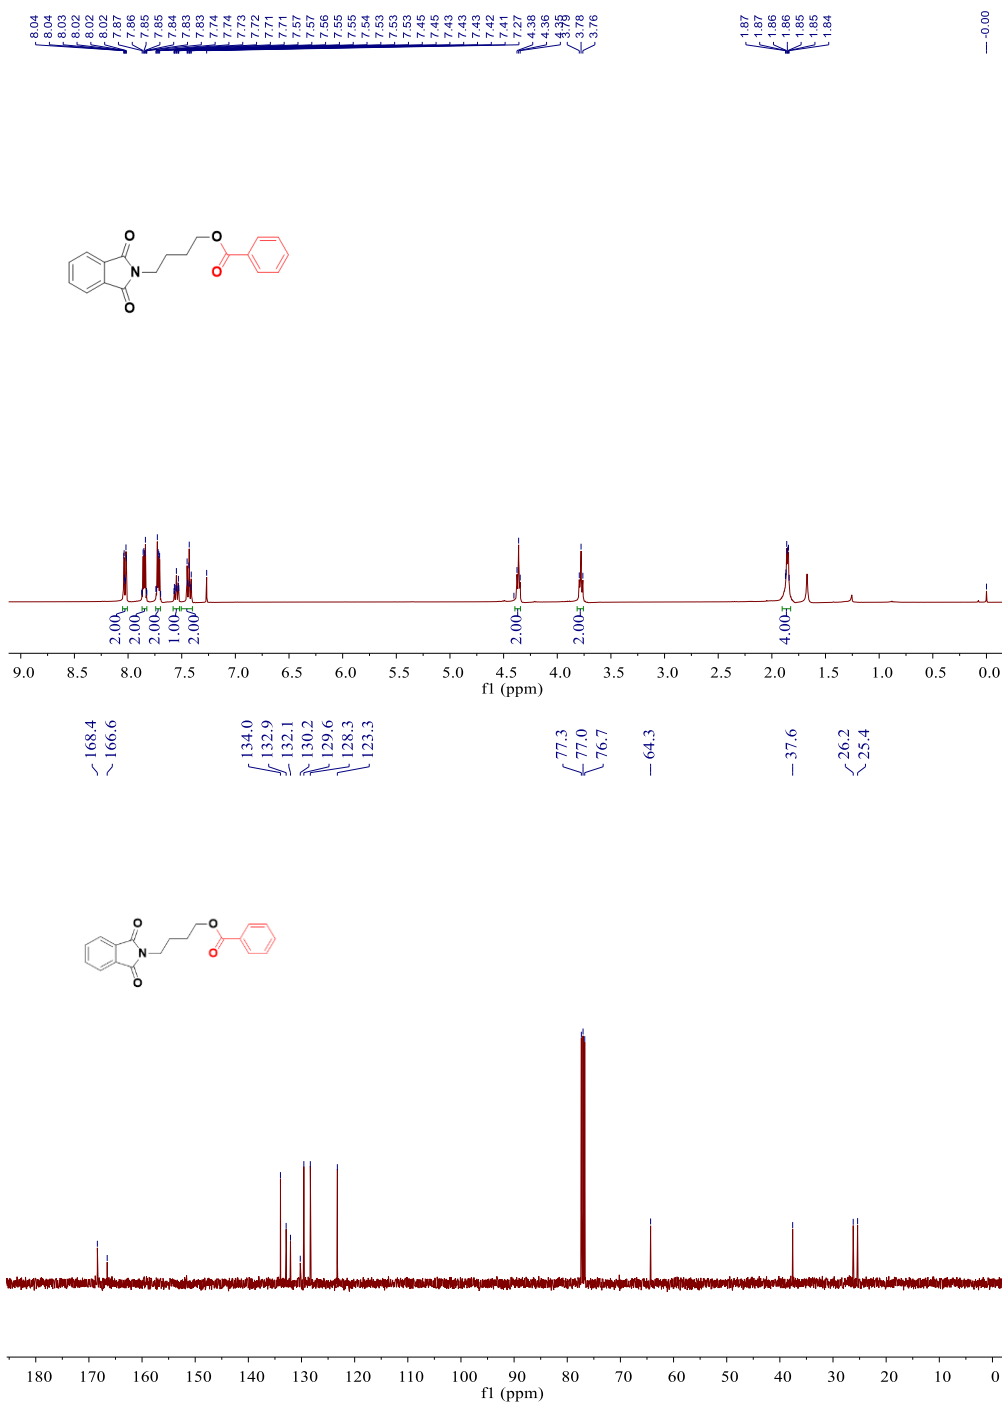

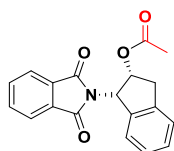

**(1S,2R)-1-(1,3-Dioxisoindolin-2-yl)-2,3-dihydro-1H-inden-2-yl acetate (3ax)**

petroleum ether / ethyl acetate = 5:1, white solid, 62% yield (39.6 mg). mp: 135 – 137°C.  $^1\text{H NMR}$  (400 MHz,  $\text{CDCl}_3$ )  $\delta$  7.87 – 7.82 (m, 2H), 7.76 – 7.71 (m, 2H), 7.32 – 7.31 (m, 2H), 7.22 – 7.20 (m, 2H), 5.96 (d,  $J = 7.8$  Hz, 1H), 5.68 (q,  $J = 7.3$  Hz, 1H), 3.47 (d,  $J = 7.1$  Hz, 2H), 1.86 (s, 3H).  $^{13}\text{C NMR}$  (100 MHz,  $\text{CDCl}_3$ )  $\delta$  170.2, 167.7, 140.9, 136.5, 134.0, 131.6, 129.0, 127.2, 124.8, 124.6, 123.3, 72.8, 54.7, 38.0, 20.6. **HRMS** (ESI-TOF): Anal Calcd. For.  $\text{C}_{19}\text{H}_{15}\text{NO}_4 + \text{H}^+$ : 322.1074, Found: 322.1070. **IR** (neat,  $\text{cm}^{-1}$ ):  $\nu$  2850, 1705, 1600, 1450, 1205, 905, 710.

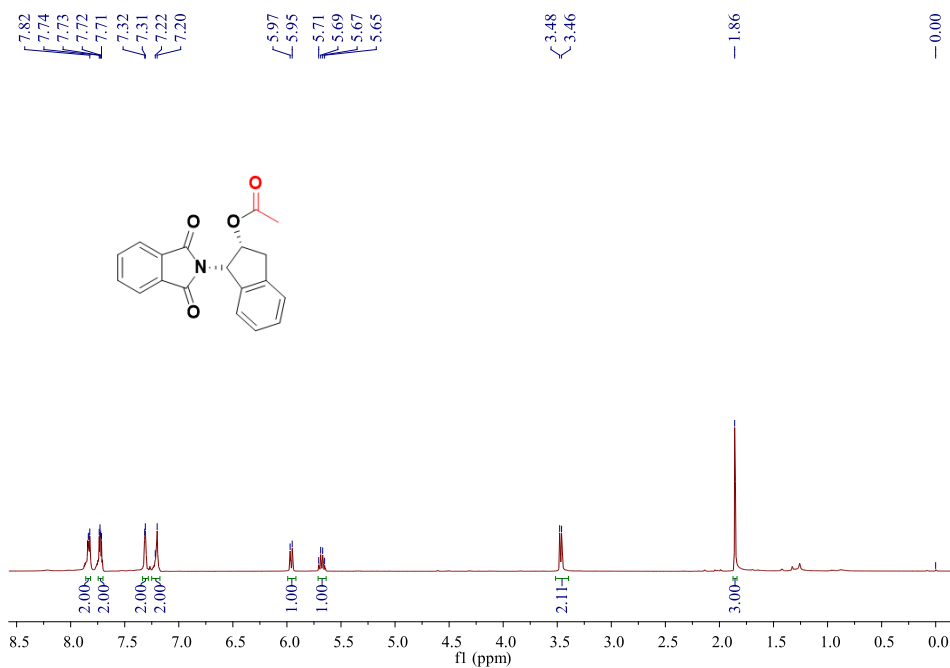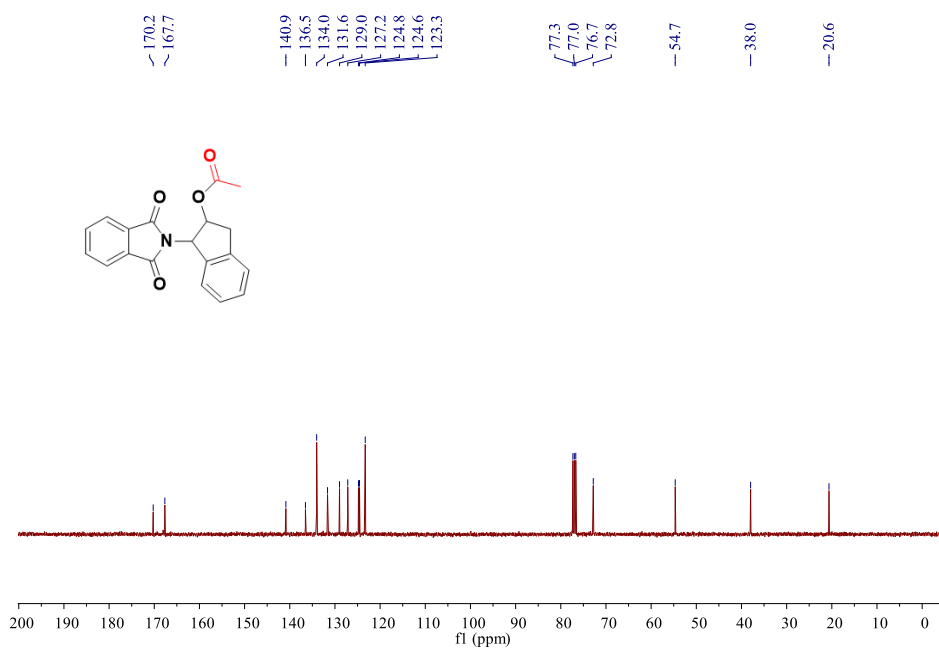

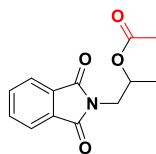

### 1-(1,3-Dioxisoindolin-2-yl)propan-2-yl acetate (3ay)

petroleum ether / ethyl acetate = 5:1, white solid, 91% yield (44.7 mg). mp: 80 – 83°C.  $^1\text{H NMR}$  (400 MHz,  $\text{CDCl}_3$ )  $\delta$  7.88 – 7.85 (m, 2H), 7.75 – 7.72 (m, 2H), 5.22 (dd,  $J = 10.1, 5.2$  Hz, 1H), 3.86 – 3.84 (m, 2H), 1.99 (s, 3H), 1.32 – 1.29 (m, 3H).  $^{13}\text{C NMR}$  (100 MHz,  $\text{CDCl}_3$ )  $\delta$  170.6, 168.2, 134.0, 131.8, 123.3, 68.4, 41.9, 21.1, 17.6. **HRMS** (ESI-TOF): Anal Calcd. For.  $\text{C}_{17}\text{H}_{20}\text{Cl}_2\text{O}_5 + \text{H}^+$ : 248.0917, Found: 248.0913. **IR** (neat,  $\text{cm}^{-1}$ ):  $\nu$  1775, 1713, 1615, 1468, 1397, 1241, 1036, 906, 723, 648.

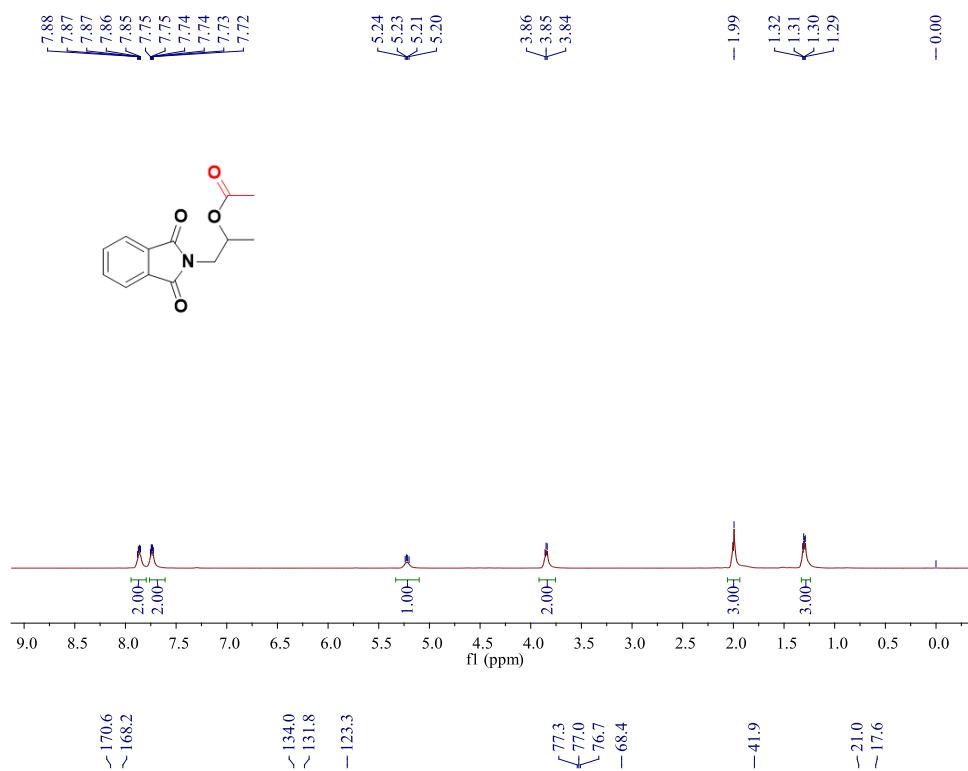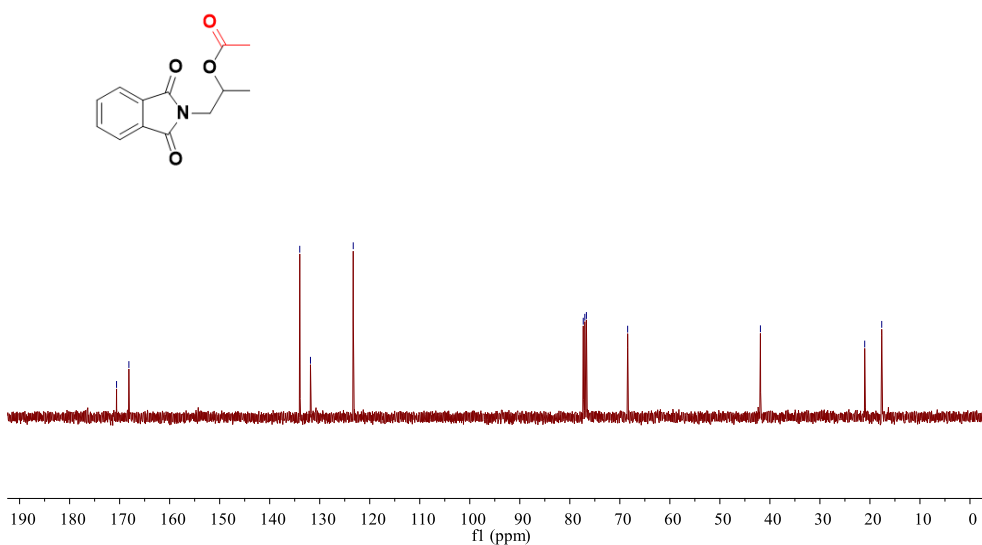



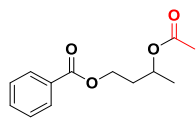

### 3-Acetoxybutyl benzoate (3az)

petroleum ether / ethyl acetate = 20:1, colorless oil, 82% yield (38.9 mg). **<sup>1</sup>H NMR** (400 MHz, CDCl<sub>3</sub>) δ 8.05–8.02 (m, 2H), 7.58–7.54 (m, 1H), 7.44–7.42 (m, 1H), 5.14–5.08 (m, 1H), 4.44–4.32 (m, 2H), 2.09–1.97 (m, 5H), 1.31 (d, *J* = 6.3 Hz, 3H). **<sup>13</sup>C NMR** (100 MHz, CDCl<sub>3</sub>) δ 170.6, 166.5, 132.9, 130.1, 129.5, 128.3, 68.0, 61.3, 34.8, 21.2, 20.1. **HRMS** (ESI-TOF): Anal Calcd. For. C<sub>13</sub>H<sub>16</sub>O<sub>4</sub> +H<sup>+</sup>: 237.1121, Found: 237.1118. **IR** (neat, cm<sup>-1</sup>): ν 2869, 1709, 1613, 1586, 1396, 1240, 818, 676.

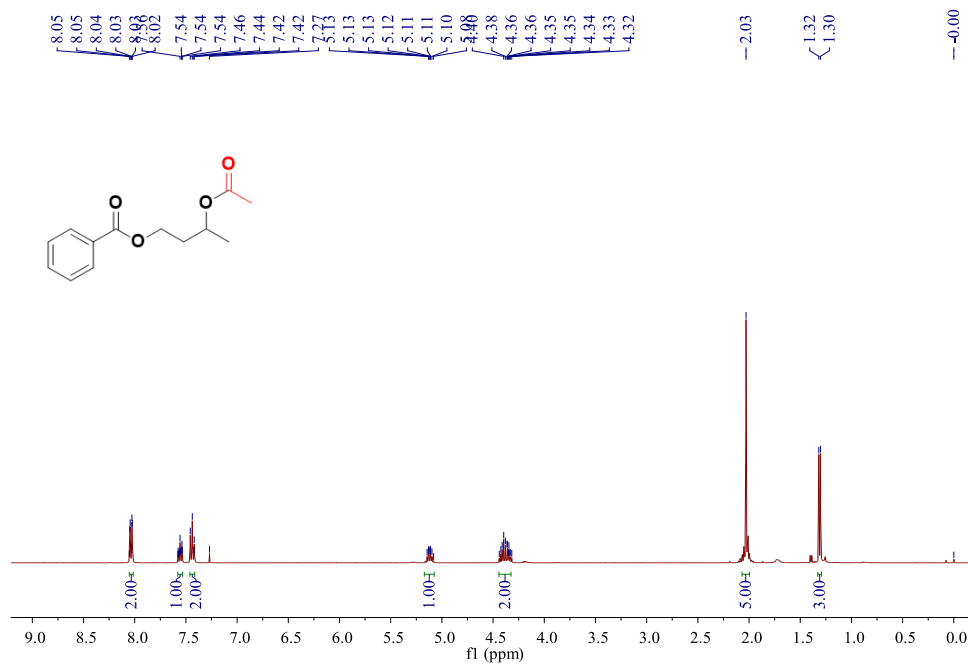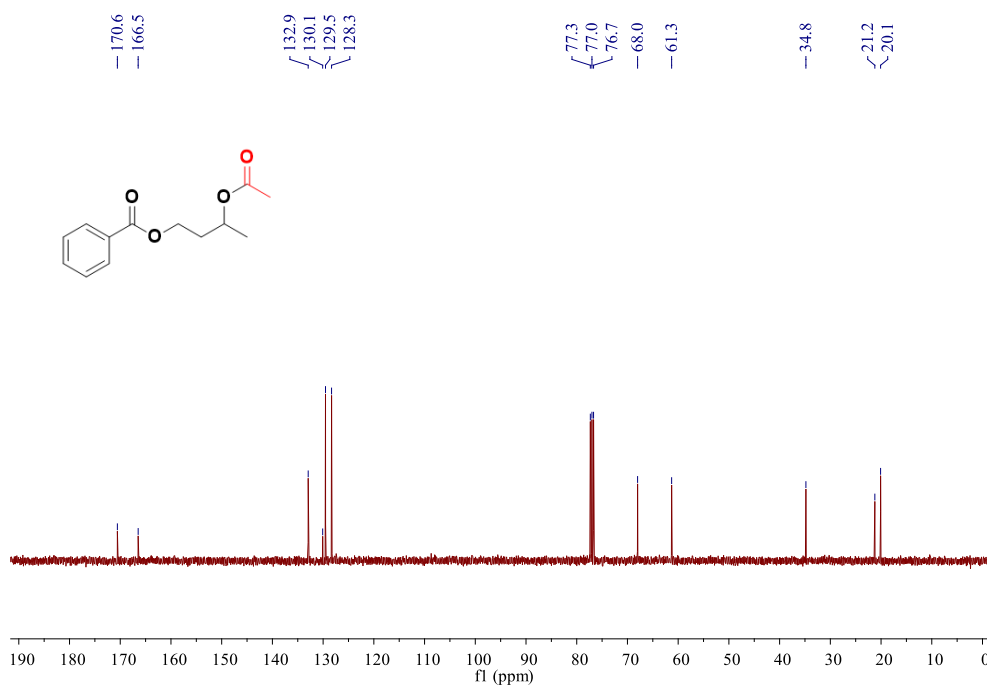

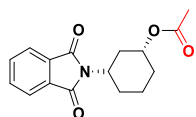

**(1R,3S)-3-(1,3-dioxisoindolin-2-yl) cyclohexyl acetate (3ba)**

petroleum ether / ethyl acetate = 5:1, white solid, 77% yield (44.1 mg). mp: 100 – 105°C. <sup>1</sup>H NMR (400 MHz, CDCl<sub>3</sub>) δ 7.85 – 7.80 (m, 2H), 7.73 – 7.69 (m, 2H), 5.27 – 5.25 (m, 1H), 4.53 – 4.46 (m, 1H), 2.58 – 2.51 (m, 1H), 2.24 – 2.15 (m, 1H), 2.12 (s, 3H), 1.95 – 1.89 (m, 2H), 1.81 – 1.72 (m, 3H), 1.60 – 1.51 (m, 1H). <sup>13</sup>C NMR (100 MHz, CDCl<sub>3</sub>) δ 170.5, 168.3, 133.8, 131.8, 123.0, 70.0, 45.8, 33.0, 29.1, 28.6, 21.4, 20.1. HRMS (ESI-TOF): Anal Calcd. For. C<sub>16</sub>H<sub>17</sub>NO<sub>4</sub>+Na<sup>+</sup>: 310.1050, Found: 310.1048. IR (neat, cm<sup>-1</sup>): ν 2868, 1760, 1702, 1613, 1455, 1397, 1211, 1075, 896, 714.

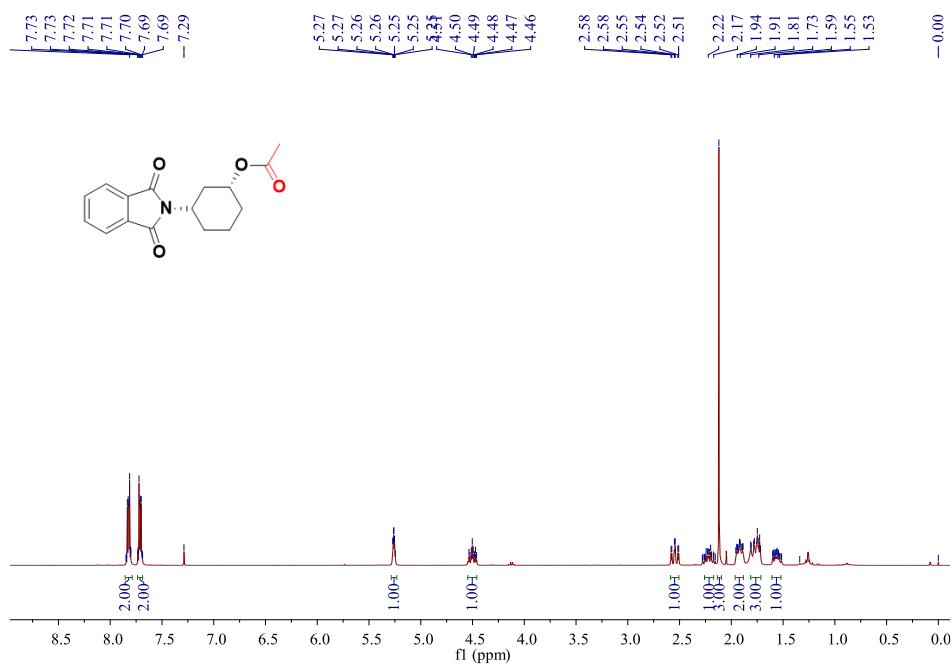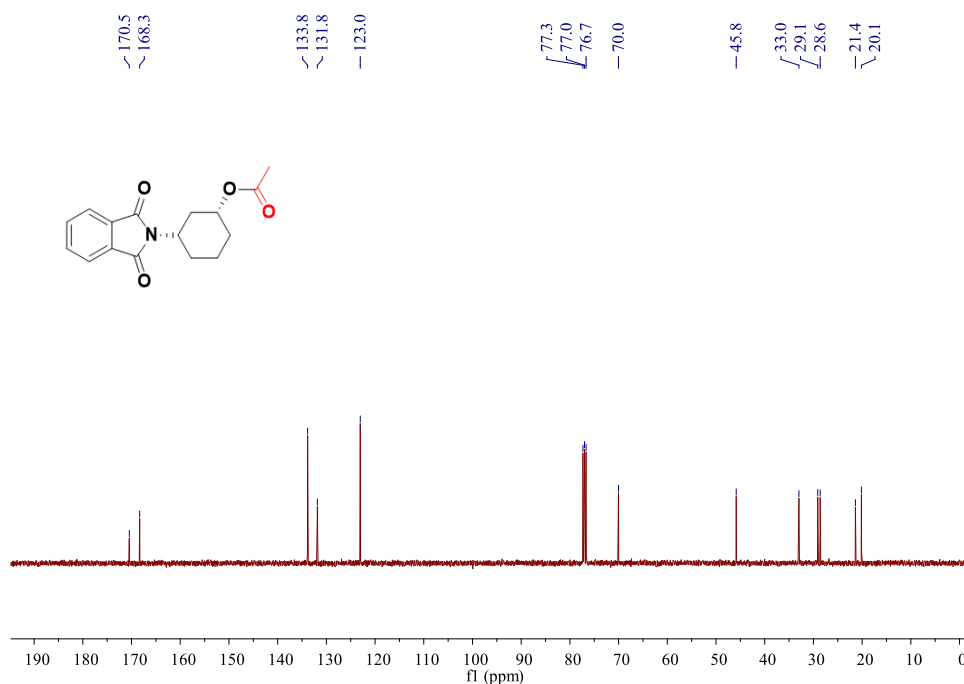

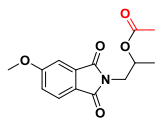

**1-(5-Methoxy-1,3-dioxoisindolin-2-yl)propan-2-yl acetate (3bb)**

petroleum ether / ethyl acetate = 5:1, white solid, 80% yield (44.3 mg). mp: 80 – 82°C. <sup>1</sup>H NMR (400 MHz, CDCl<sub>3</sub>) δ 7.76 (d, *J* = 8.3 Hz, 1H), 7.33 (d, *J* = 2.2 Hz, 1H), 7.17 (dd, *J* = 8.3, 2.2 Hz, 1H), 5.24 – 5.17 (m, 1H), 3.93 (s, 3H), 3.82 – 3.80 (m, 2H), 1.99 (s, 3H), 1.29 (d, *J* = 6.5 Hz, 3H). <sup>13</sup>C NMR (100 MHz, CDCl<sub>3</sub>) δ 170.6, 168.0, 167.9, 164.7, 134.5, 125.0, 123.7, 119.8, 108.0, 68.5, 56.0, 41.9, 21.1, 17.6. HRMS (ESI-TOF): Anal Calcd. For. C<sub>14</sub>H<sub>15</sub>NO<sub>5</sub>+H<sup>+</sup>: 278.1023, Found: 278.1020. IR (neat, cm<sup>-1</sup>): ν 2844, 1770, 1616, 1489, 1286, 1093, 955, 769, 605.

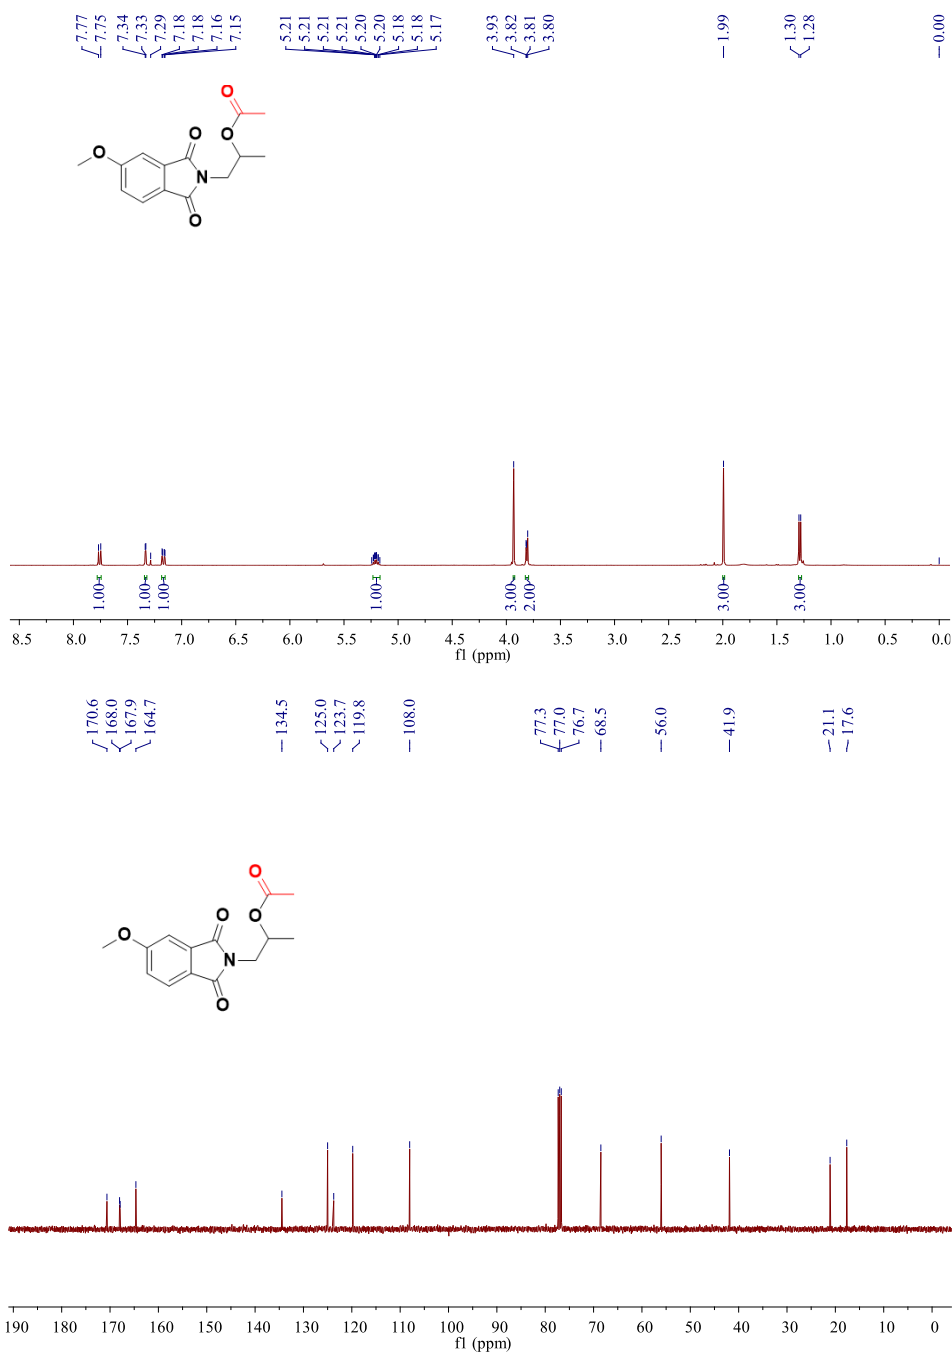

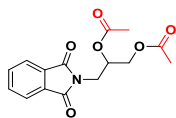

### 3-(1,3-Dioxoisindolin-2-yl)propane-1,2-diyl diacetate (3bc)

petroleum ether / ethyl acetate = 5:1, colorless oil, 60% yield (36.8 mg).  $^1\text{H NMR}$  (400 MHz,  $\text{CDCl}_3$ )  $\delta$  7.89 – 7.84 (m, 2H), 7.77 – 7.72 (m, 2H), 5.36 – 5.31 (m, 1H), 4.31 (dd,  $J = 12.1, 4.1$  Hz, 1H), 4.16 (dd,  $J = 12.1, 5.8$  Hz, 1H), 3.96 (d,  $J = 5.2$  Hz, 2H), 2.09 (s, 3H), 2.04 (s, 3H).  $^{13}\text{C NMR}$  (100 MHz,  $\text{CDCl}_3$ )  $\delta$  170.5, 170.4, 168.0, 134.2, 131.8, 123.4, 69.3, 63.0, 38.1, 20.8, 20.7. **HRMS** (ESI-TOF): Anal Calcd. For.  $\text{C}_{15}\text{H}_{15}\text{NO}_6 + \text{H}^+$ : 306.0972, Found: 306.0969. **IR** (neat,  $\text{cm}^{-1}$ ):  $\nu$  2852, 1775, 1713, 1615, 1468, 1390, 1220, 1034, 794, 627.

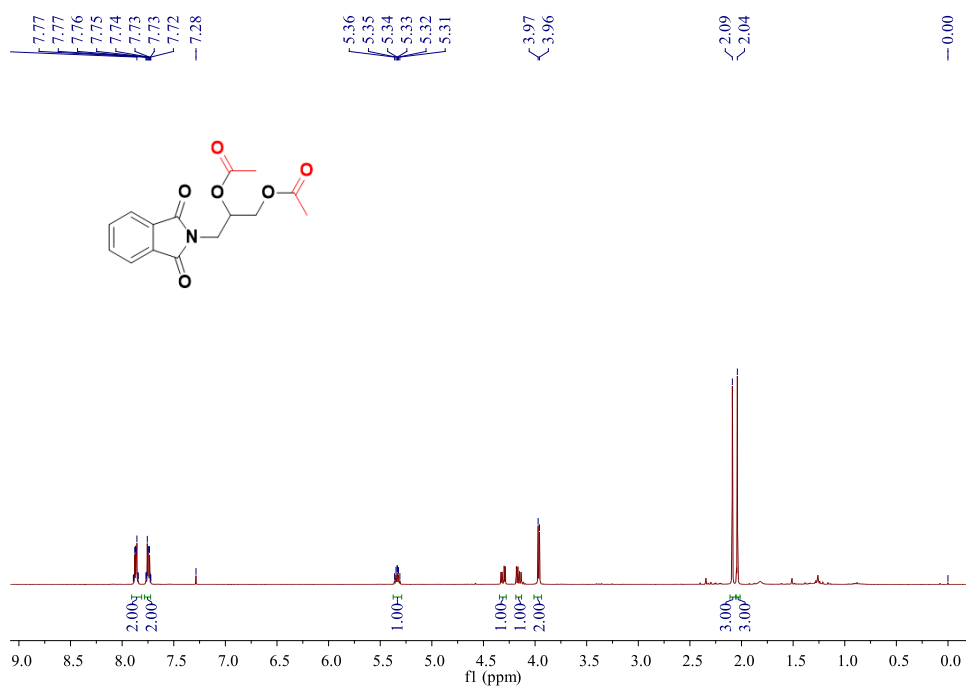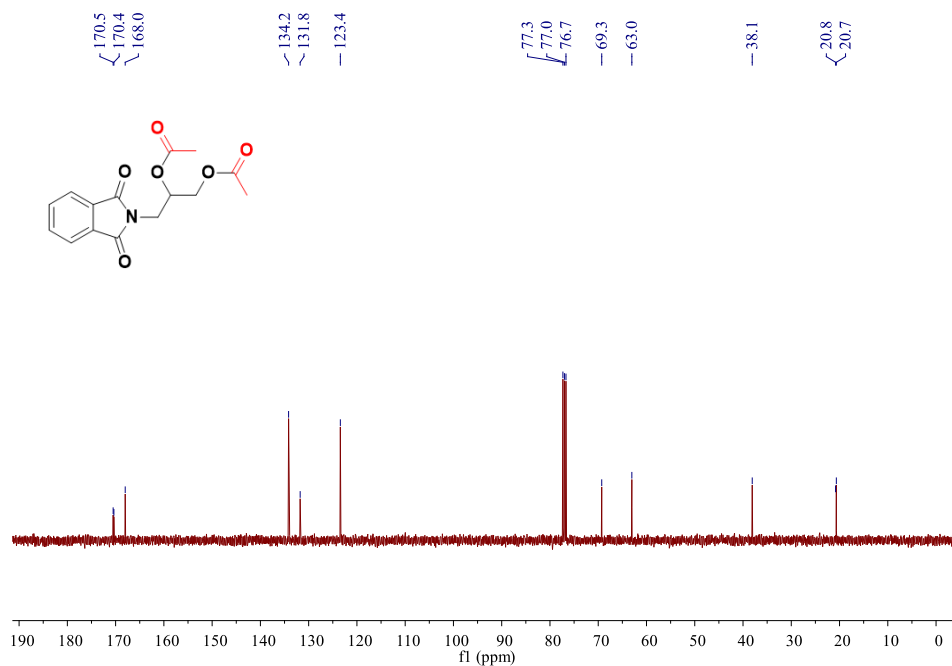

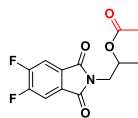

**1-(5,6-Difluoro-1,3-dioxoisindolin-2-yl)propan-2-yl acetate (3bd)**

petroleum ether / ethyl acetate = 5:1, colorless oil, 80% yield (45.1 mg).  $^1\text{H NMR}$  (400 MHz,  $\text{CDCl}_3$ )  $\delta$  7.68 (t,  $J = 7.3$  Hz, 2H), 5.24 – 5.17 (m, 1H), 3.87 – 3.78 (m, 2H), 1.98 (s, 3H), 1.29 (d,  $J = 6.5$  Hz, 3H).  $^{13}\text{C NMR}$  (100 MHz,  $\text{CDCl}_3$ )  $\delta$  170.7, 166.2, 155.7 (d,  $J = 15.3$  Hz), 153.1 (d,  $J = 15.3$  Hz), 128.7 (t,  $J = 6.0$  Hz), 113.3 (dd,  $J = 14.6, 7.5$  Hz), 68.3, 42.5, 21.0, 17.7.  $^{19}\text{F NMR}$  (377 MHz,  $\text{CDCl}_3$ )  $\delta$  -125.6 (s, 2F). **HRMS** (ESI-TOF): Anal Calcd. For.  $\text{C}_{13}\text{H}_{11}\text{F}_2\text{NO}_4 + \text{H}^+$ : 284.0729, Found: 284.0725. **IR** (neat,  $\text{cm}^{-1}$ ):  $\nu$  2850, 1780, 1714, 1622, 1494, 1397, 1295, 1030, 907, 727, 605.

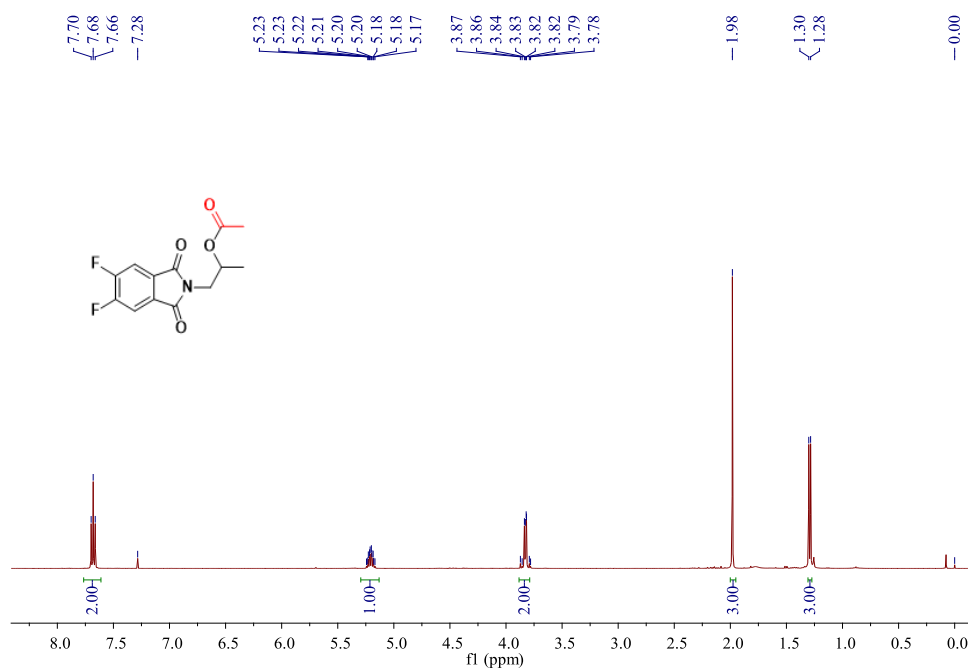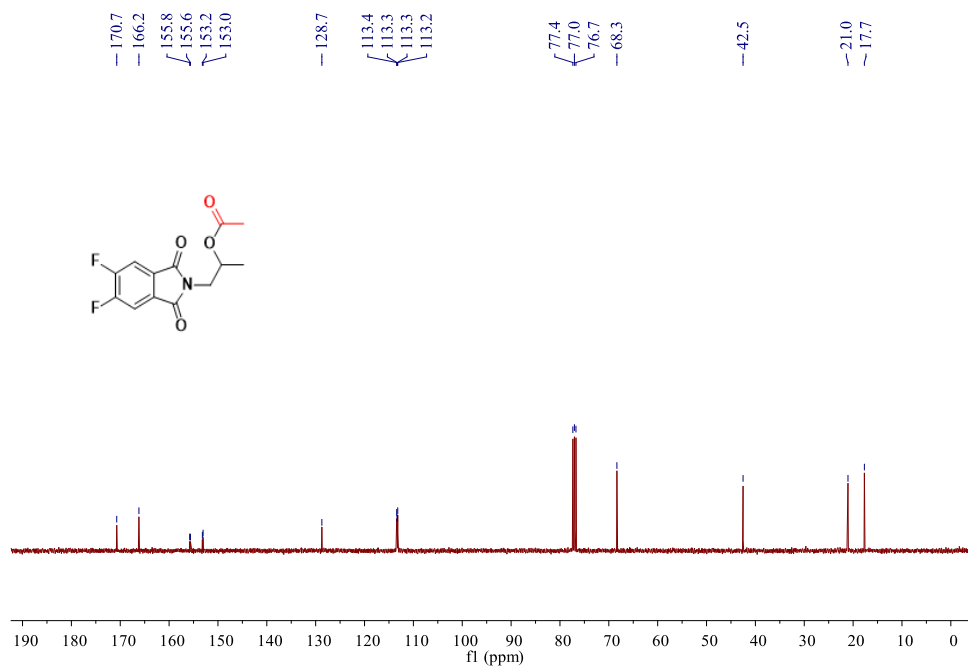

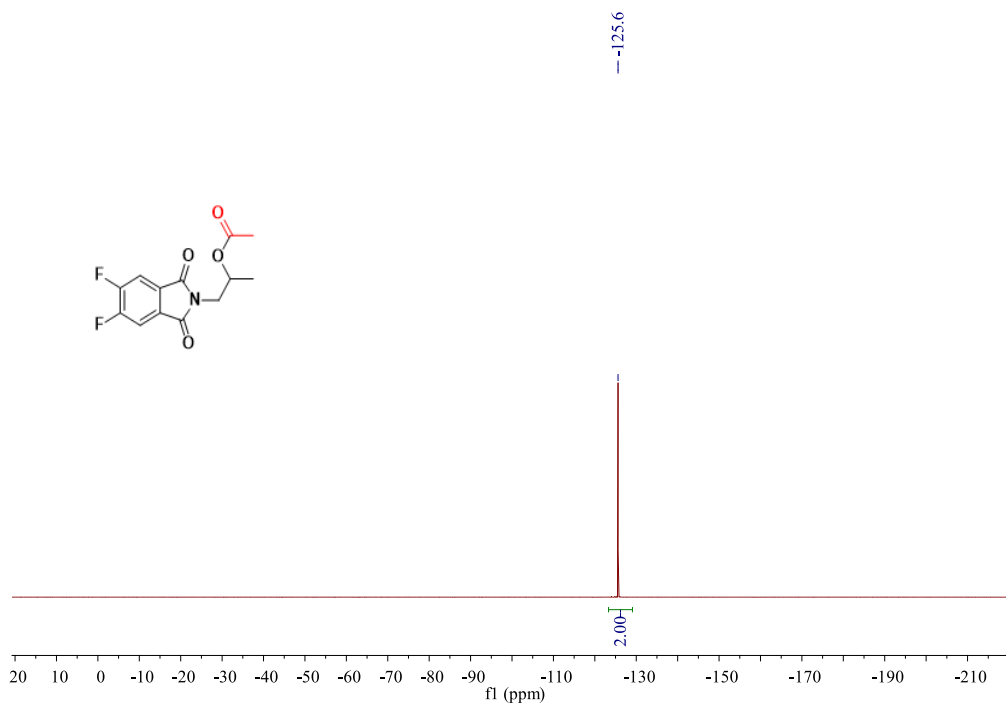

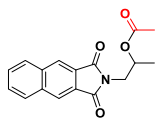

**1-(1,3-Dioxo-1,3-dihydro-2H-benzo[f]isoindol-2-yl)propan-2-yl acetate (3be)**

petroleum ether / ethyl acetate = 5:1, white solid, 85% yield (50.3 mg). mp: 116 – 118°C. <sup>1</sup>H NMR (400 MHz, CDCl<sub>3</sub>) δ 8.32 (s, 1H), 8.04 (dd, *J* = 6.2, 3.3 Hz, 2H), 7.69 (dd, *J* = 6.2, 3.3 Hz, 2H), 5.32 – 5.24 (m, 1H), 3.95 – 3.86 (m, 2H), 2.00 (s, 3H), 1.33 (d, *J* = 6.5 Hz, 3H). <sup>13</sup>C NMR (100 MHz, CDCl<sub>3</sub>) δ 170.6, 167.8, 135.3, 130.2, 129.1, 127.4, 124.7, 68.4, 42.1, 21.1, 17.7. HRMS (ESI-TOF): Anal Calcd. For. C<sub>17</sub>H<sub>15</sub>NO<sub>4</sub>+H<sup>+</sup>: 298.1074, Found: 298.1070. IR (neat, cm<sup>-1</sup>): ν 2852, 1766, 1602, 1515, 1376, 1242, 1182, 1032, 764.

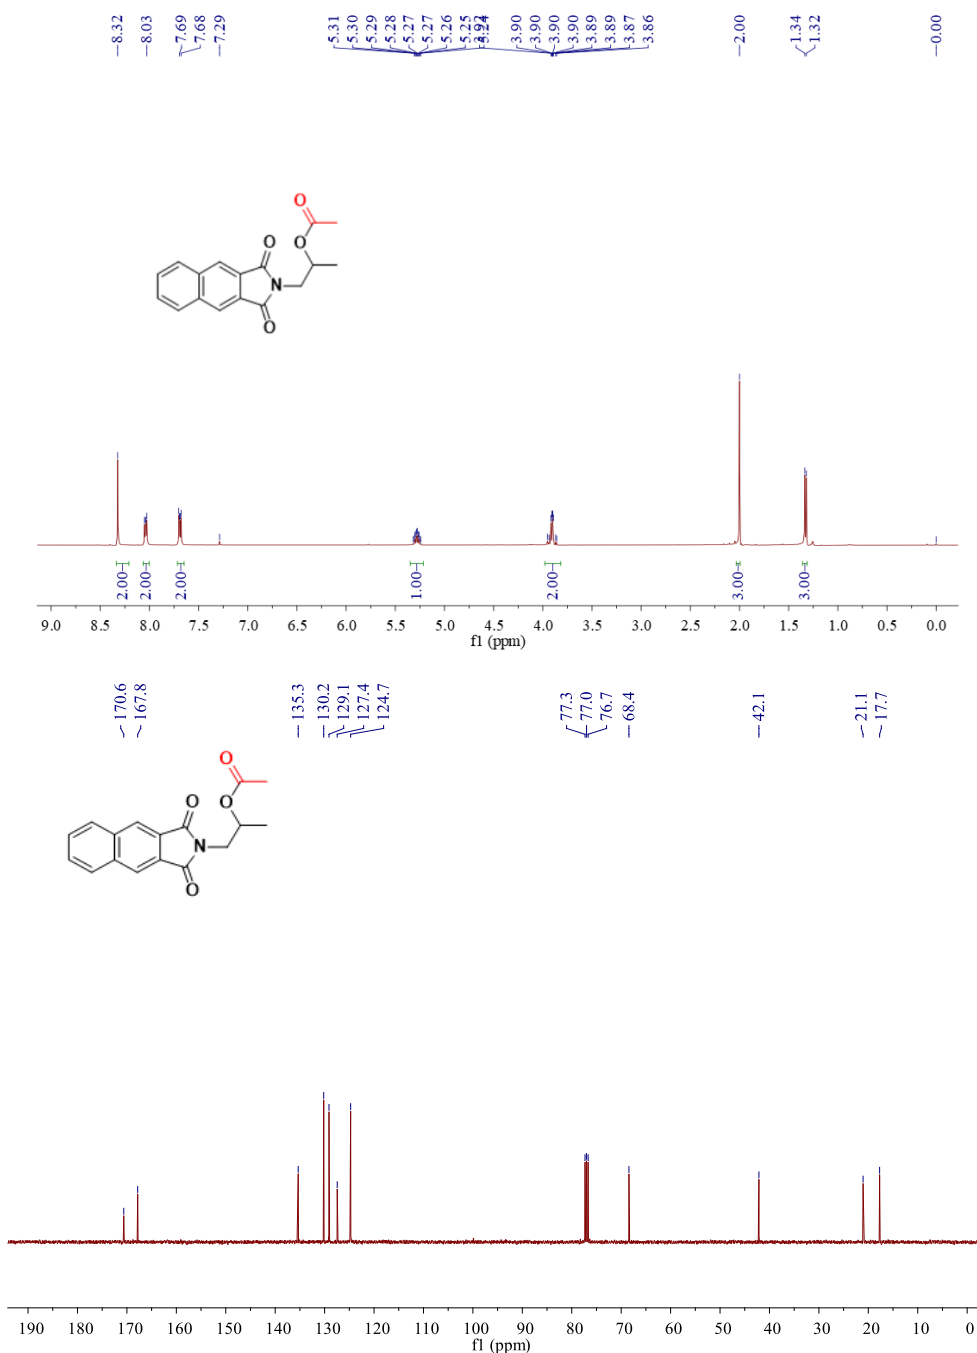

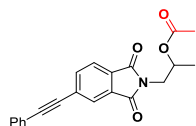

**1-(1,3-Dioxo-5-(phenylethynyl)isoindolin-2-yl)propan-2-yl acetate (3bf)**

petroleum ether / ethyl acetate = 5:1, white solid, 35% yield (24.2 mg). mp: 78 – 80°C.  $^1\text{H NMR}$  (400 MHz,  $\text{CDCl}_3$ )  $\delta$  7.98 (t,  $J = 1.0$  Hz, 1H), 7.84 (d,  $J = 1.0$  Hz, 2H), 7.57 – 7.55 (m, 2H), 7.40 – 7.38 (m, 2H), 5.24 – 5.20 (m, 1H), 3.85 – 3.84 (m, 2H), 2.00 (s, 3H), 1.30 (d,  $J = 6.5$  Hz, 3H).  $^{13}\text{C NMR}$  (100 MHz,  $\text{CDCl}_3$ )  $\delta$  170.7, 167.6, 167.6, 136.9, 132.2, 131.8, 130.5, 129.7, 129.2, 128.5, 126.2, 123.4, 122.1, 93.9, 87.7, 68.4, 42.1, 21.1, 17.7. HRMS (ESI-TOF): Anal Calcd. For.  $\text{C}_{21}\text{H}_{17}\text{NO}_4 + \text{H}^+$ : 348.1230, Found: 348.1226. IR (neat,  $\text{cm}^{-1}$ ):  $\nu$  2850, 2200, 1770, 1713, 1615, 1515, 1494, 1244, 1033, 906, 725.

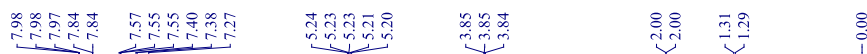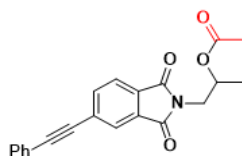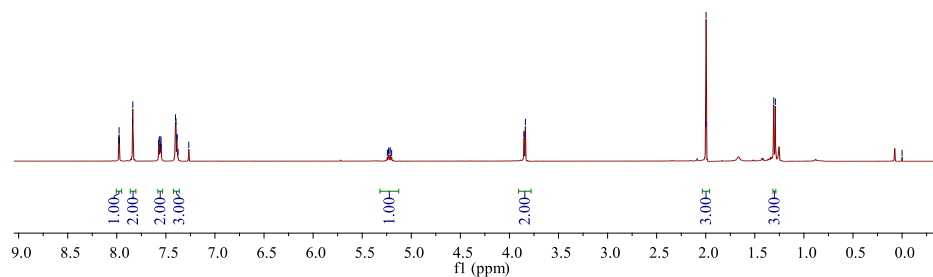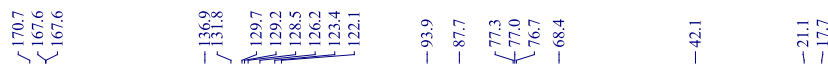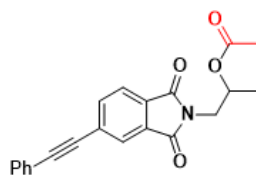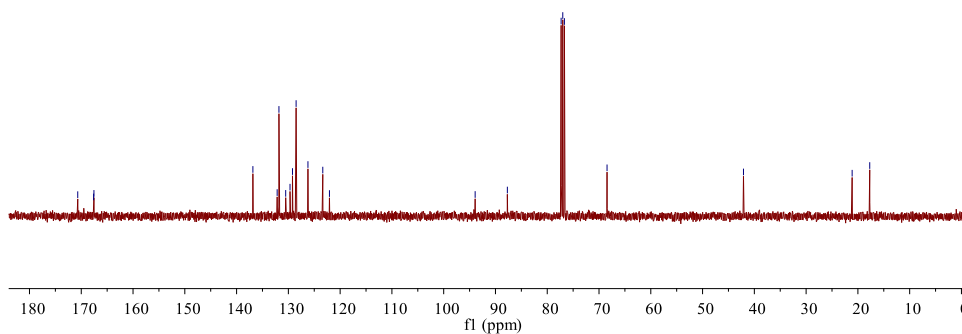



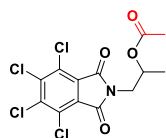

**1-(4,5,6,7-Tetrachloro-1,3-dioxoisindolin-2-yl)propan-2-yl acetate (3bg)**

petroleum ether / ethyl acetate = 5:1, white solid, 83% yield (63.8 mg). mp: 151 – 153°C.  $^1\text{H NMR}$  (400 MHz,  $\text{CDCl}_3$ )  $\delta$  5.24 – 5.19 (m, 1H), 3.89 – 3.80 (m, 2H), 1.99 (s, 3H), 1.31 (d,  $J = 6.5$  Hz, 3H).  $^{13}\text{C NMR}$  (100 MHz,  $\text{CDCl}_3$ )  $\delta$  170.8, 163.4, 140.2, 129.7, 127.4, 68.2, 42.8, 21.0, 17.7. HRMS (ESI-TOF): Anal Calcd. For.  $\text{C}_{13}\text{H}_9\text{Cl}_4\text{NO}_4 + \text{Na}^+$ : 405.9178, Found: 405.9181. IR (neat,  $\text{cm}^{-1}$ ):  $\nu$  2851, 1774, 1426, 1357, 1301, 1194, 1045, 740, 628.

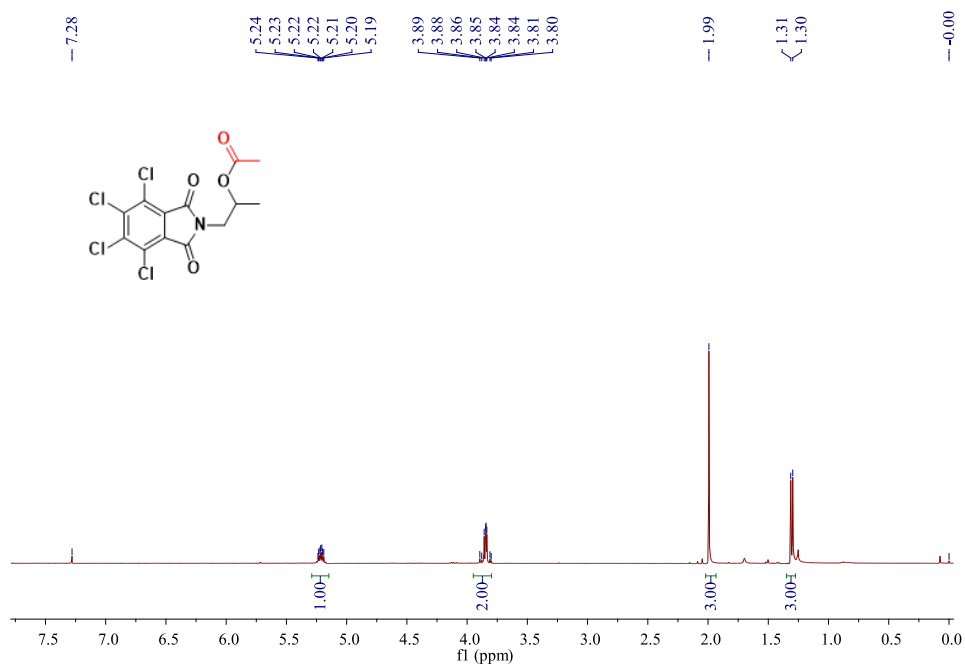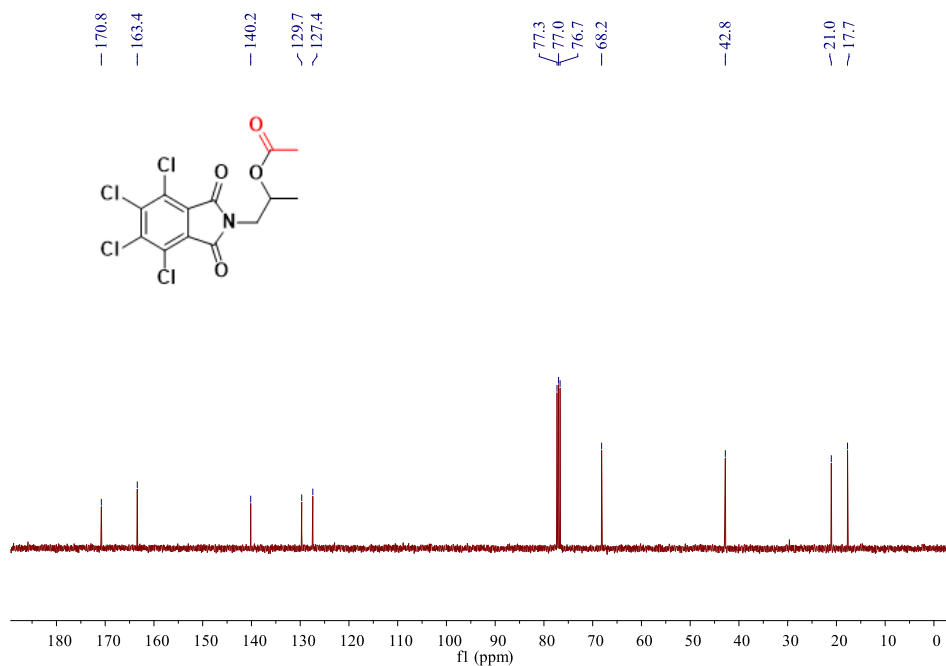

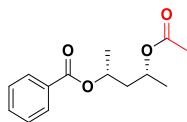

**(2R,4R)-4-Acetoxy-pentan-2-yl benzoate (3bh)**

petroleum ether / ethyl acetate = 10:1, colorless oil, 80% yield (40.0 mg). **<sup>1</sup>H NMR** (400 MHz, CDCl<sub>3</sub>) δ 8.03 – 8.01 (m, 2H), 7.56 – 7.52 (m, 1H), 7.44 – 7.41 (m, 2H), 5.28 – 5.22 (m, 1H), 5.05 – 5.00 (m, 1H), 1.98 (s, 3H), 1.95 – 1.90 (m, 2H), 1.36 (d, *J* = 6.3 Hz, 2H), 1.27 (d, *J* = 6.3 Hz, 2H). **<sup>13</sup>C NMR** (100 MHz, CDCl<sub>3</sub>) δ 170.5, 166.0, 132.8, 130.5, 129.4, 128.2, 68.0, 67.4, 42.2, 21.1, 20.5, 20.4. **HRMS** (ESI-TOF): Anal Calcd. For. C<sub>14</sub>H<sub>18</sub>O<sub>4</sub>+H<sup>+</sup>: 251.1278, Found: 251.1274. **IR** (neat, cm<sup>-1</sup>): ν 2853, 1773, 1608, 1507, 1427, 1367, 1234, 986, 728.

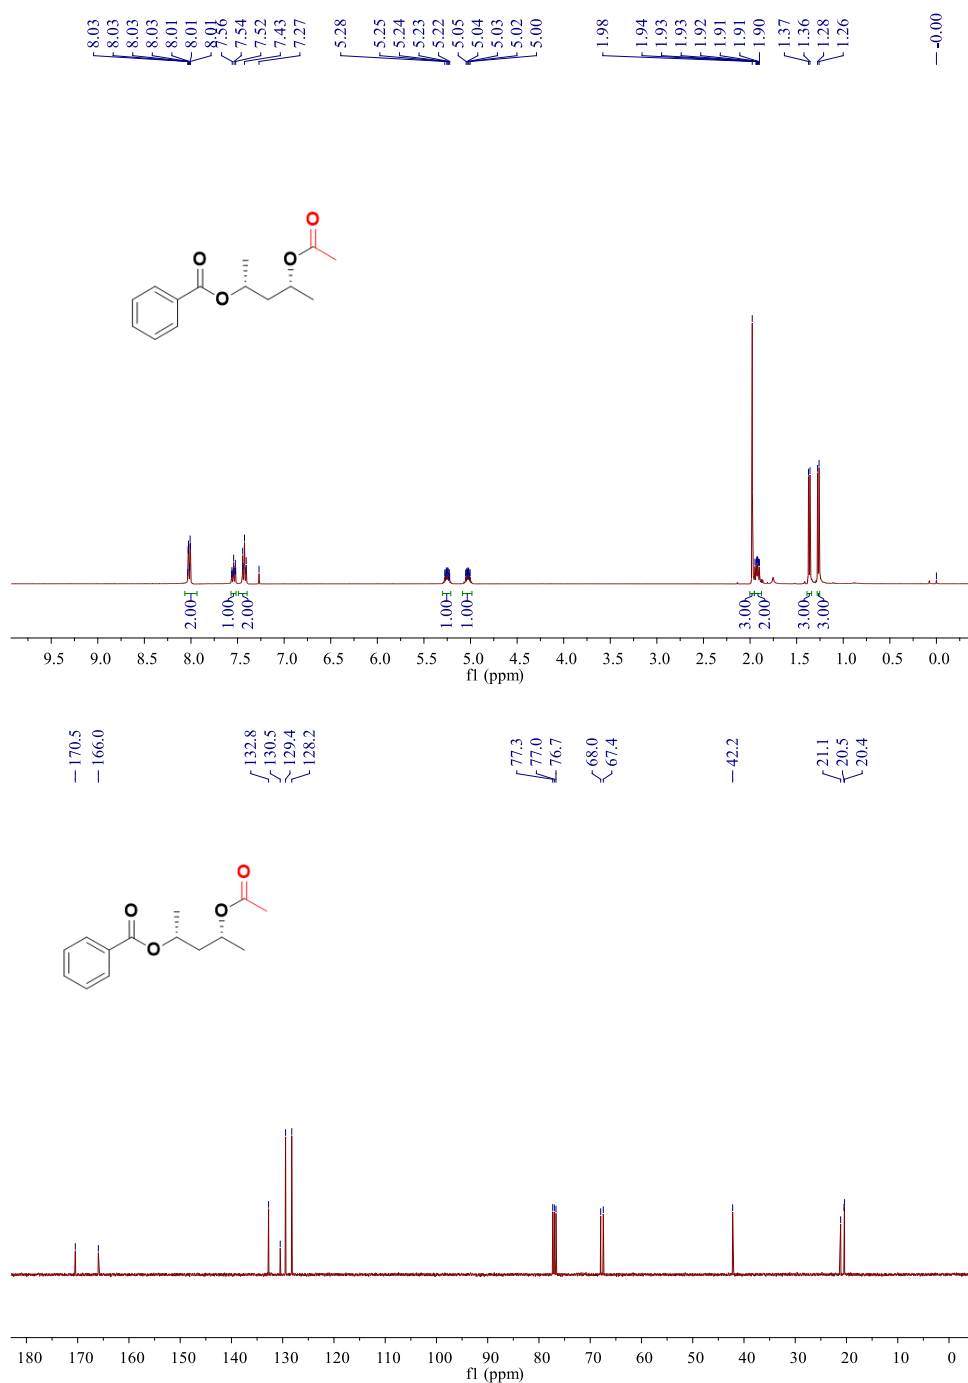

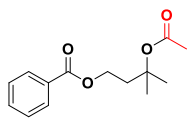

### 3-Acetoxy-3-methylbutyl benzoate (3bi)

petroleum ether / ethyl acetate = 10:1, colorless oil, 70% yield (35.0 mg).  $^1\text{H NMR}$  (400 MHz,  $\text{CDCl}_3$ )  $\delta$  8.03 (dd,  $J = 8.2, 1.2$  Hz, 2H), 7.58 – 7.54 (m, 1H), 7.46 – 7.42 (m, 2H), 4.43 (t,  $J = 6.8$  Hz, 2H), 2.28 (t,  $J = 6.8$  Hz, 2H), 1.96 (s, 3H), 1.54 (s, 6H).  $^{13}\text{C NMR}$  (100 MHz,  $\text{CDCl}_3$ )  $\delta$  170.5, 166.6, 133.0, 130.2, 129.5, 128.4, 80.8, 61.2, 39.1, 26.5, 22.4. **HRMS** (ESI-TOF): Anal Calcd. For.  $\text{C}_{14}\text{H}_{18}\text{O}_4 + \text{Na}^+$ : 273.1097, Found: 273.1093. **IR** (neat,  $\text{cm}^{-1}$ ):  $\nu$  2929, 1717, 1652, 1585, 1471, 1222, 1176, 903, 723 649.

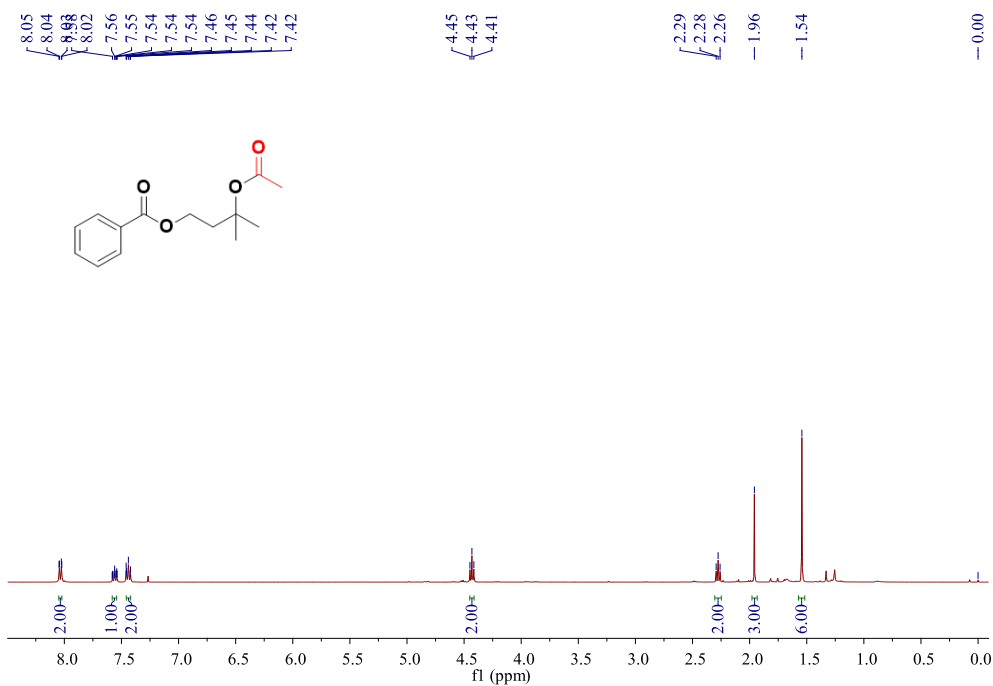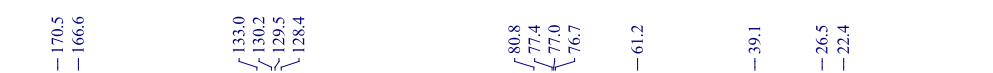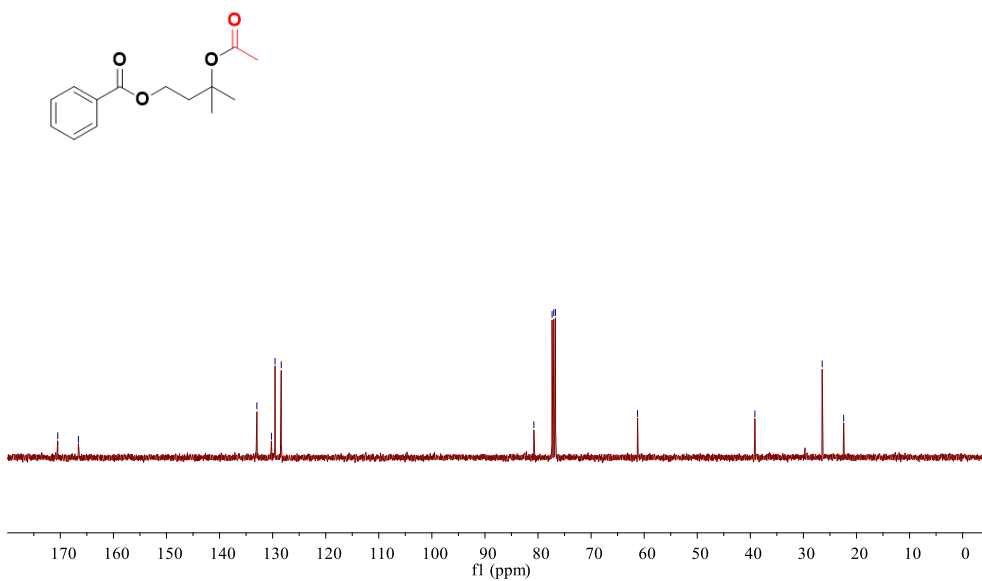

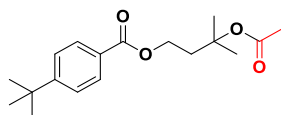

### 3-Acetoxy-3-methylbutyl 4-(tert-butyl)benzoate (3bj)

petroleum ether / ethyl acetate = 20:1, colorless oil, 75% yield (45.8 mg).  $^1\text{H NMR}$  (400 MHz,  $\text{CDCl}_3$ )  $\delta$  7.97 – 7.94 (m, 2H), 7.47 – 7.44 (m, 2H), 4.41 (t,  $J = 6.8$  Hz, 2H), 2.26 (t,  $J = 6.8$  Hz, 2H), 1.96 (s, 3H), 1.54 (s, 6H), 1.34 (s, 9H).  $^{13}\text{C NMR}$  (100 MHz,  $\text{CDCl}_3$ )  $\delta$  170.5, 166.6, 156.6, 129.4, 127.4, 125.3, 80.8, 61.0, 39.2, 35.1, 31.1, 26.5, 22.4. **HRMS** (ESI-TOF): Anal Calcd. For.  $\text{C}_{18}\text{H}_{26}\text{O}_4 + \text{Na}^+$ : 329.1723, Found: 329.1713. **IR** (neat,  $\text{cm}^{-1}$ ):  $\nu$  2870, 1716, 1610, 1570, 1472, 1388, 1277, 905, 725.

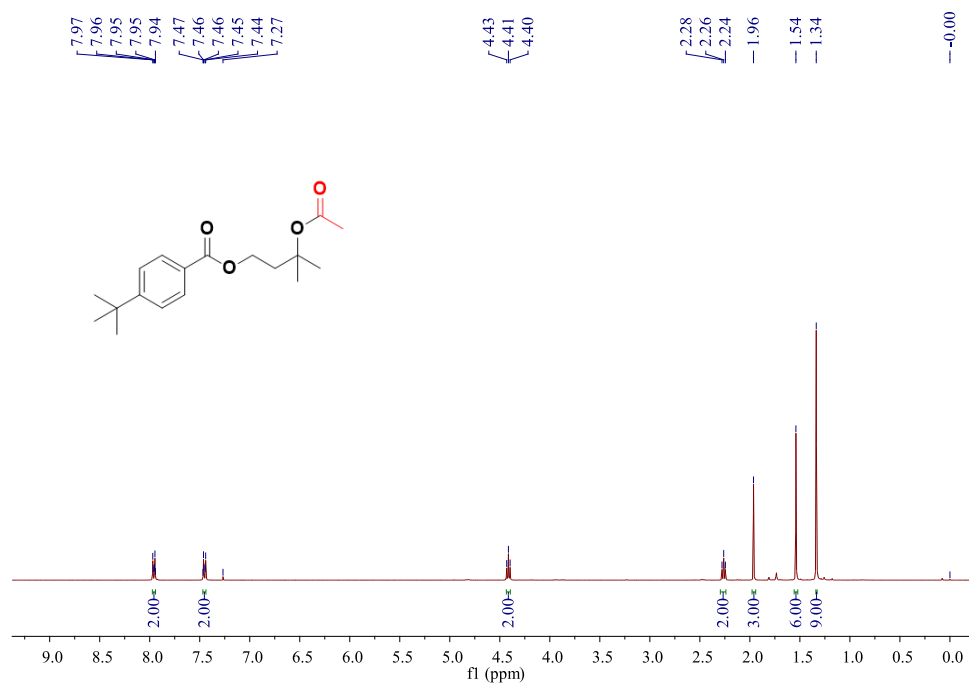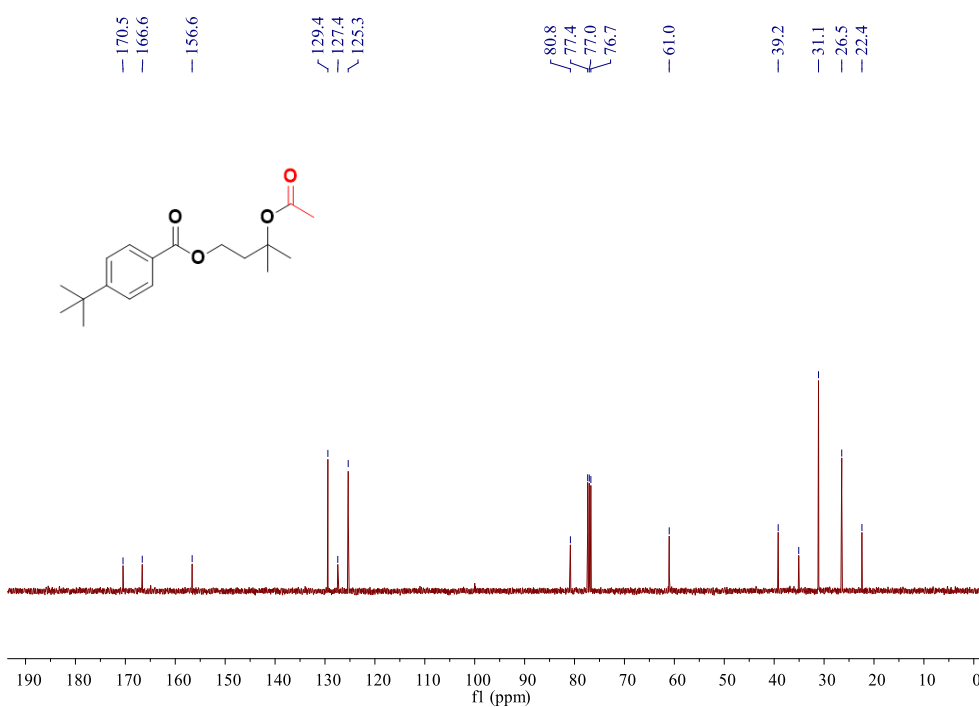

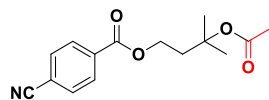

### 3-Acetoxy-3-methylbutyl 4-cyanobenzoate (3bk)

petroleum ether / ethyl acetate = 20:1, yellow oil, 66% yield (36.4 mg).  $^1\text{H NMR}$  (400 MHz,  $\text{CDCl}_3$ )  $\delta$  8.15 – 8.12 (m, 2H), 7.77 – 7.74 (m, 2H), 4.47 (t,  $J = 6.9$  Hz, 2H), 2.30 (t,  $J = 6.9$  Hz, 2H), 1.96 (s, 3H), 1.54 (s, 6H).  $^{13}\text{C NMR}$  (100 MHz,  $\text{CDCl}_3$ )  $\delta$  170.4, 164.8, 133.9, 132.2, 130.0, 117.9, 116.4, 80.5, 62.0, 38.9, 26.4, 22.3. **HRMS** (ESI-TOF): Anal Calcd. For.  $\text{C}_{15}\text{H}_{17}\text{NO}_4 + \text{Na}^+$ : 298.1050, Found: 298.1049. **IR** (neat,  $\text{cm}^{-1}$ ):  $\nu$  2931, 2205, 1770, 1611, 1514, 1465, 1368, 1249, 1045, 767, 691.

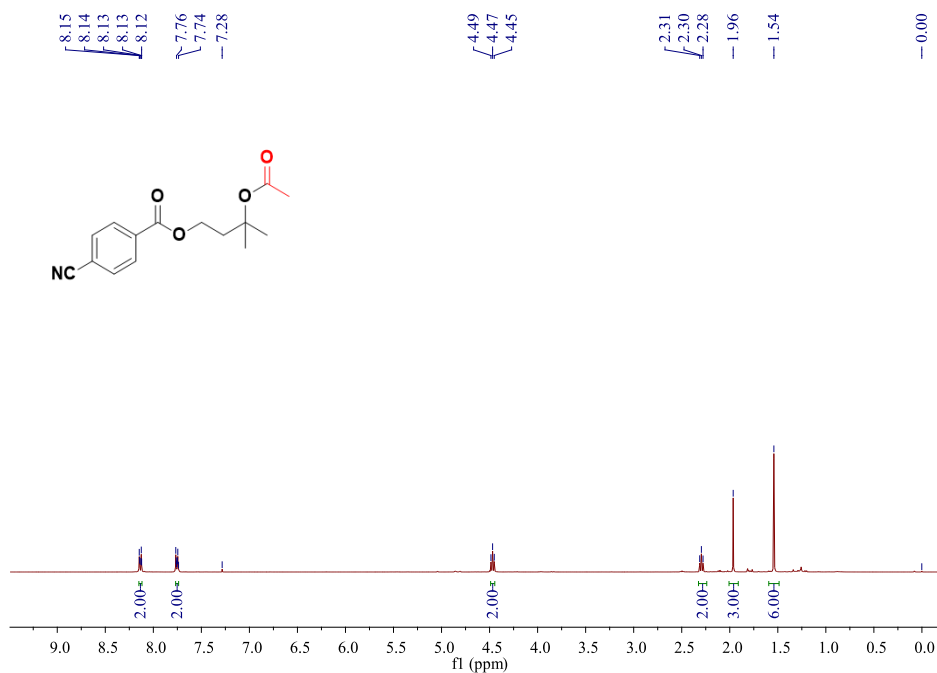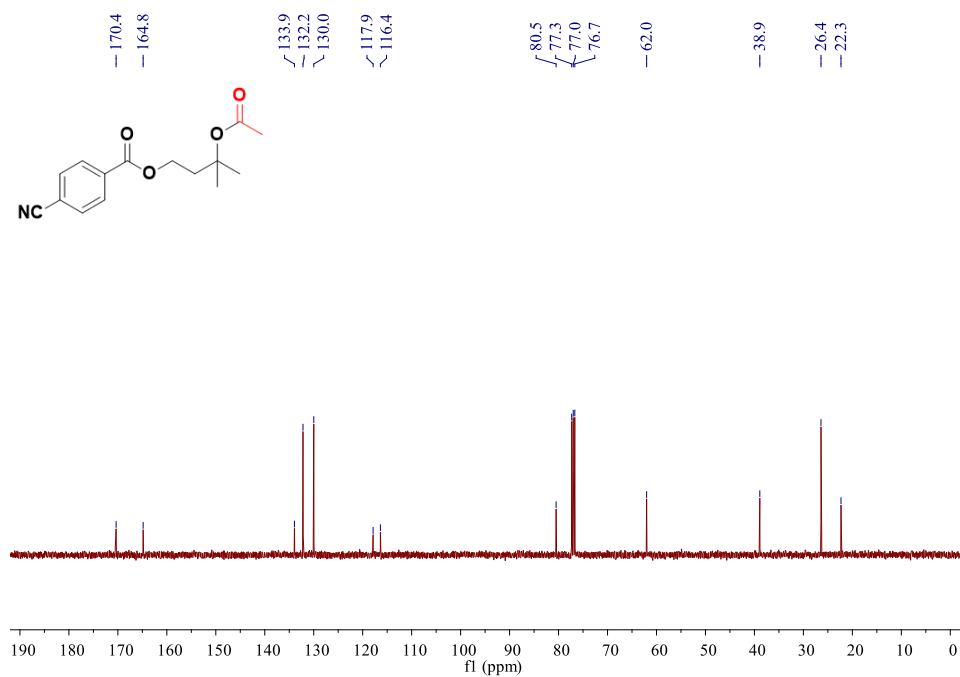

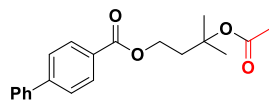

### 3-Acetoxy-3-methylbutyl [1,1'-biphenyl]-4-carboxylate (3bl)

petroleum ether / ethyl acetate = 20:1, yellow oil, 40% yield (25.6 mg).  $^1\text{H NMR}$  (400 MHz,  $\text{CDCl}_3$ )  $\delta$  8.11 – 8.09 (m, 2H), 7.67 – 7.61 (m, 4H), 7.49 – 7.45 (m, 2H), 7.41 – 7.38 (m, 1H), 4.45 (t,  $J = 6.8$  Hz, 2H), 2.29 (t,  $J = 6.8$  Hz, 2H), 1.97 (s, 3H), 1.55 (s, 6H).  $^{13}\text{C NMR}$  (100 MHz,  $\text{CDCl}_3$ )  $\delta$  170.5, 166.4, 145.7, 139.9, 130.0, 128.9, 128.1, 127.2, 127.0, 80.8, 61.2, 39.1, 26.5, 22.4. **HRMS** (ESI-TOF): Anal Calcd. For.  $\text{C}_{20}\text{H}_{22}\text{O}_4 + \text{Na}^+$ : 349.1410, Found: 349.1405. **IR** (neat,  $\text{cm}^{-1}$ ):  $\nu$  2929, 1716, 1609, 1560, 1487, 1368, 1267, 1019, 727, 647.

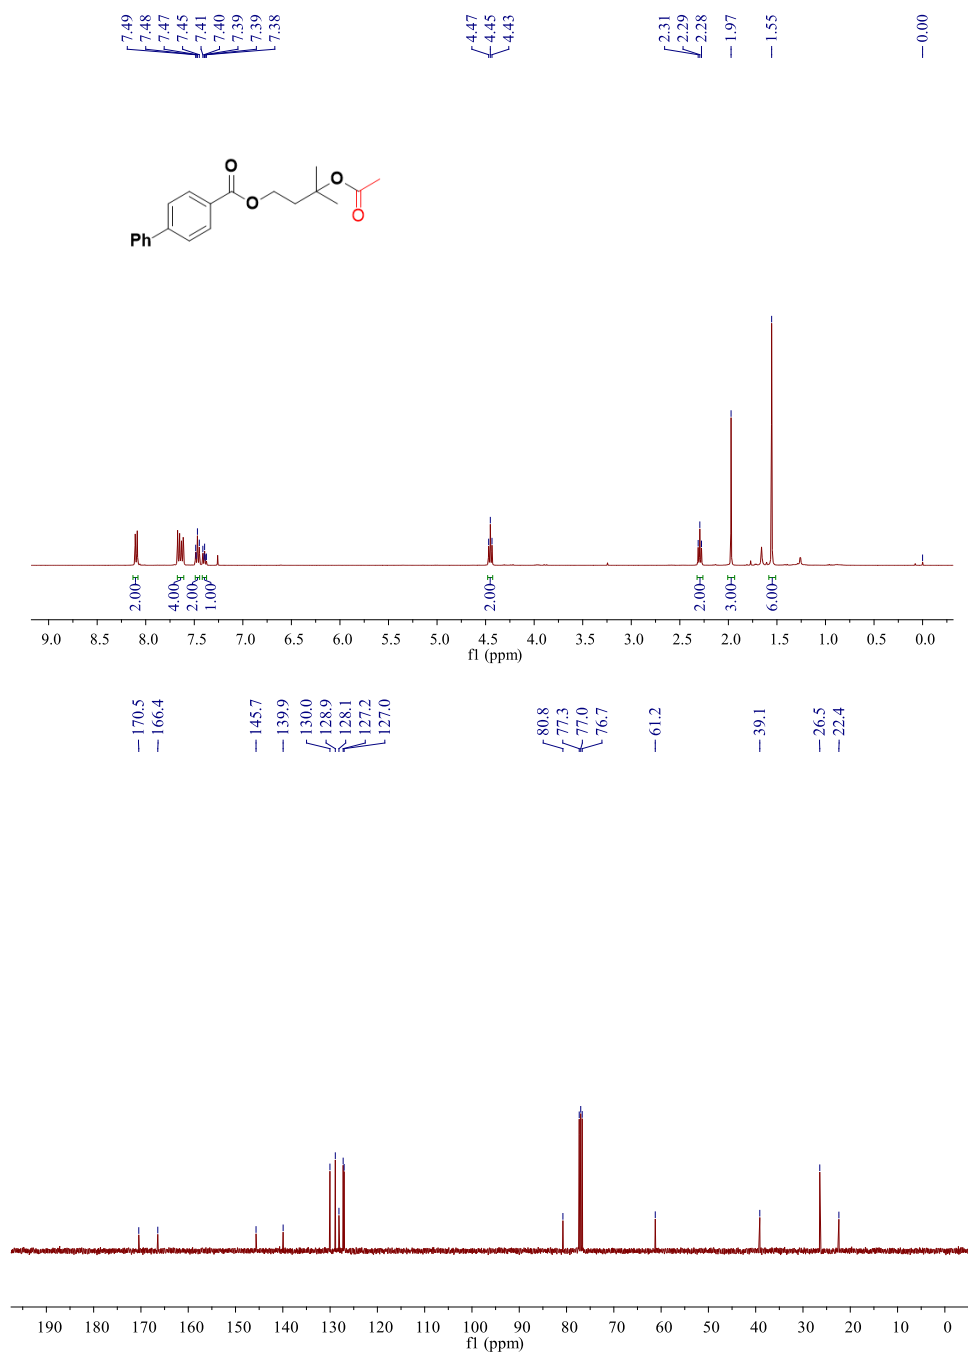

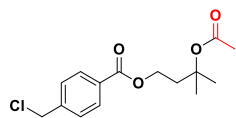

### 3-Acetoxy-3-methylbutyl 4-(chloromethyl)benzoate (3bm)

petroleum ether / ethyl acetate = 20:1, colorless oil, 65% yield (38.7 mg). **<sup>1</sup>H NMR** (400 MHz, CDCl<sub>3</sub>) δ 8.02 (d, *J* = 8.3 Hz, 2H), 7.46 (d, *J* = 8.3 Hz, 2H), 4.61 (s, 2H), 4.43 (t, *J* = 6.8 Hz, 2H), 2.27 (t, *J* = 6.8 Hz, 2H), 1.96 (s, 3H), 1.54 (s, 6H). **<sup>13</sup>C NMR** (100 MHz, CDCl<sub>3</sub>) δ 170.5, 166.0, 142.3, 130.2, 130.0, 128.5, 80.7, 61.4, 45.3, 39.1, 26.5, 22.4. **HRMS** (ESI-TOF): Anal Calcd. For. C<sub>15</sub>H<sub>19</sub><sup>35</sup>ClO<sub>4</sub> + Na<sup>+</sup>: 321.0864, Found: 321.0863; Anal Calcd. For. C<sub>15</sub>H<sub>19</sub><sup>37</sup>ClO<sub>4</sub> + Na<sup>+</sup>: 323.0835, Found: 323.0834. **IR** (neat, cm<sup>-1</sup>): ν 2936, 1713, 1613, 1454, 1369, 1222, 948, 726.

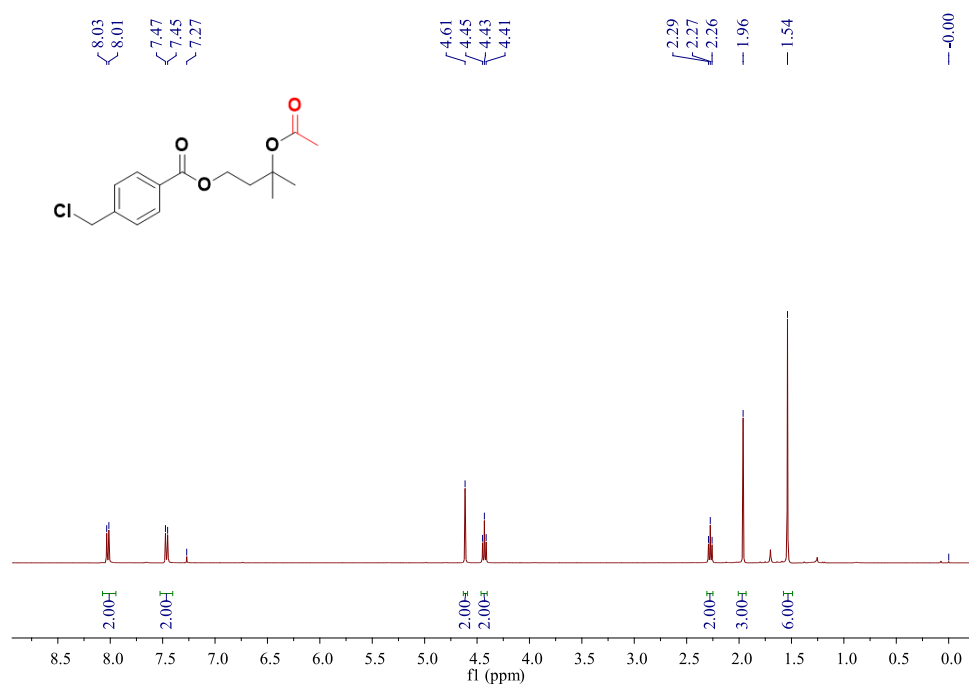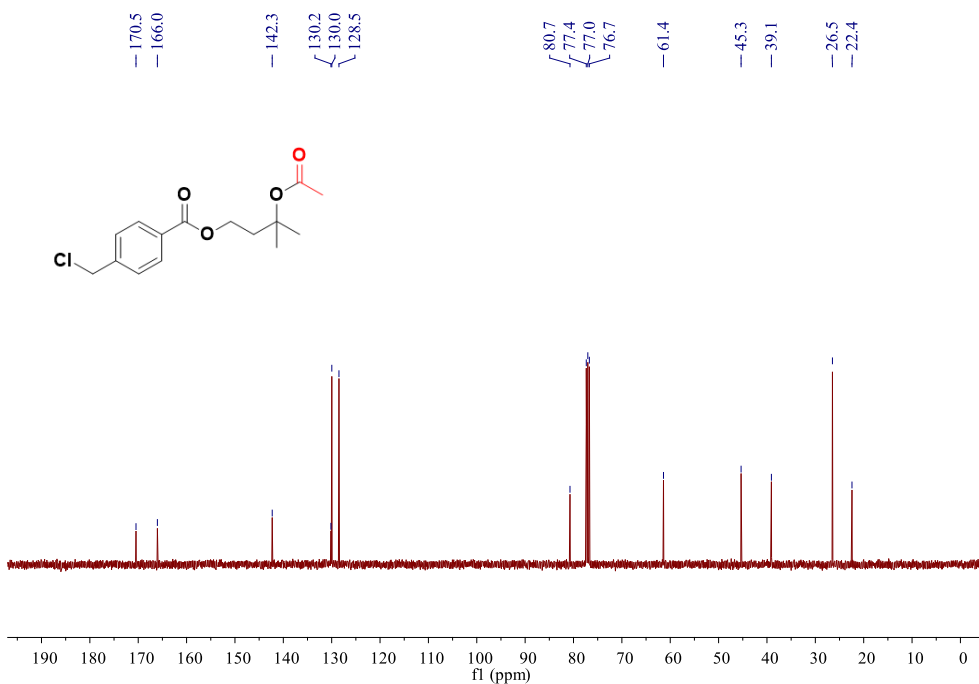

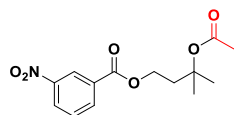

### 3-Acetoxy-3-methylbutyl 3-nitrobenzoate (3bn)

petroleum ether / ethyl acetate = 10:1, yellow oil, 65% yield (38.1 mg). **<sup>1</sup>H NMR** (400 MHz, CDCl<sub>3</sub>) δ 8.86 – 8.85 (m, 1H), 8.44 – 8.41 (m, 1H), 8.38 – 8.35 (m, 1H), 7.69 – 7.65 (m, 1H), 4.50 (t, *J* = 7.0 Hz, 2H), 2.31 (t, *J* = 7.0 Hz, 2H), 1.98 (s, 3H), 1.55 (s, 6H). **<sup>13</sup>C NMR** (100 MHz, CDCl<sub>3</sub>) δ 170.4, 164.4, 148.3, 135.2, 132.0, 129.6, 127.4, 124.5, 80.5, 62.2, 39.1, 26.4, 22.3. **HRMS** (ESI-TOF): Anal Calcd. For. C<sub>14</sub>H<sub>17</sub>NO<sub>6</sub>+Na<sup>+</sup>: 318.0948, Found: 318.0947. **IR** (neat, cm<sup>-1</sup>): ν 2932, 1722, 1617, 1532, 1440, 1387, 1294, 1096, 915, 822, 716, 652.

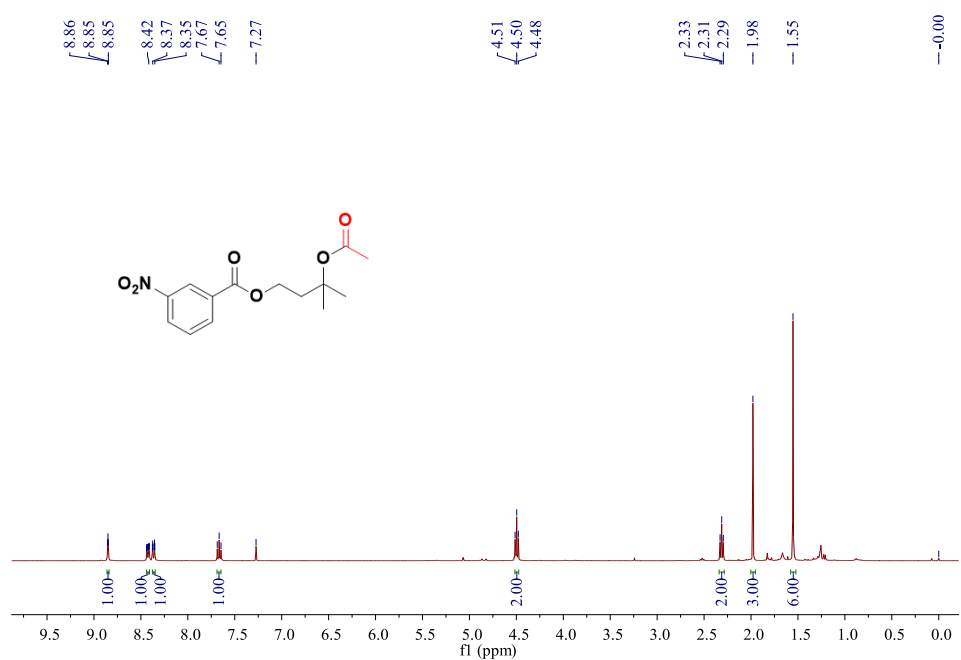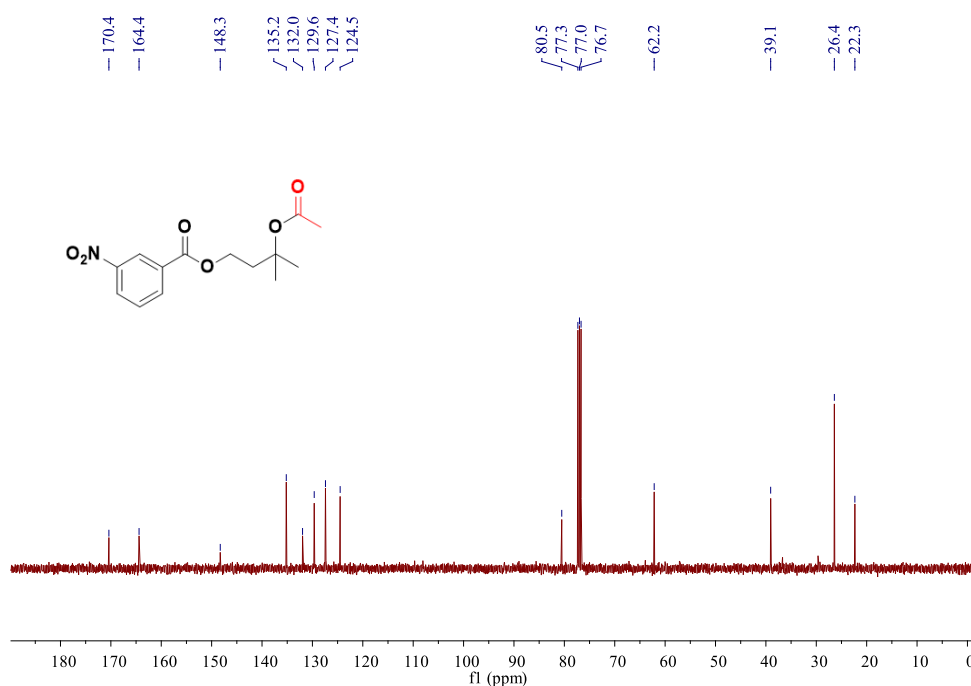



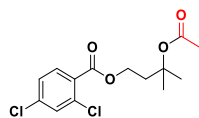

### 3-Acetoxy-3-methylbutyl 2,4-dichlorobenzoate (3bo)

petroleum ether / ethyl acetate = 20:1, colorless oil, 60% yield (37.2 mg).  $^1\text{H NMR}$  (400 MHz,  $\text{CDCl}_3$ )  $\delta$  7.80 (d,  $J = 8.4$  Hz, 1H), 7.48 (d,  $J = 2.0$  Hz, 1H), 7.30 (dd,  $J = 8.4, 2.0$  Hz, 1H), 4.43 (t,  $J = 7.0$  Hz, 2H), 2.26 (t,  $J = 7.0$  Hz, 2H), 1.96 (s, 3H), 1.53 (s, 6H).  $^{13}\text{C NMR}$  (100 MHz,  $\text{CDCl}_3$ )  $\delta$  170.4, 164.7, 138.3, 134.9, 132.4, 131.0, 128.2, 127.0, 80.6, 62.0, 39.0, 26.4, 22.4. **HRMS** (ESI-TOF): Anal Calcd. For.  $\text{C}_{14}\text{H}_{16}\text{Cl}_2\text{O}_4 + \text{Na}^+$ : 341.0318, Found: 341.0313; Anal Calcd. For.  $\text{C}_{14}\text{H}_{16}^{35}\text{Cl}^{37}\text{ClO}_4 + \text{Na}^+$ : 343.0288, Found: 343.0284; Anal Calcd. For.  $\text{C}_{14}\text{H}_{16}^{37}\text{Cl}_2\text{O}_4 + \text{Na}^+$ : 345.0259, Found: 345.0254. **IR** (neat,  $\text{cm}^{-1}$ ):  $\nu$  2900, 1736, 1624, 1582, 1418, 1228, 956, 727, 648.

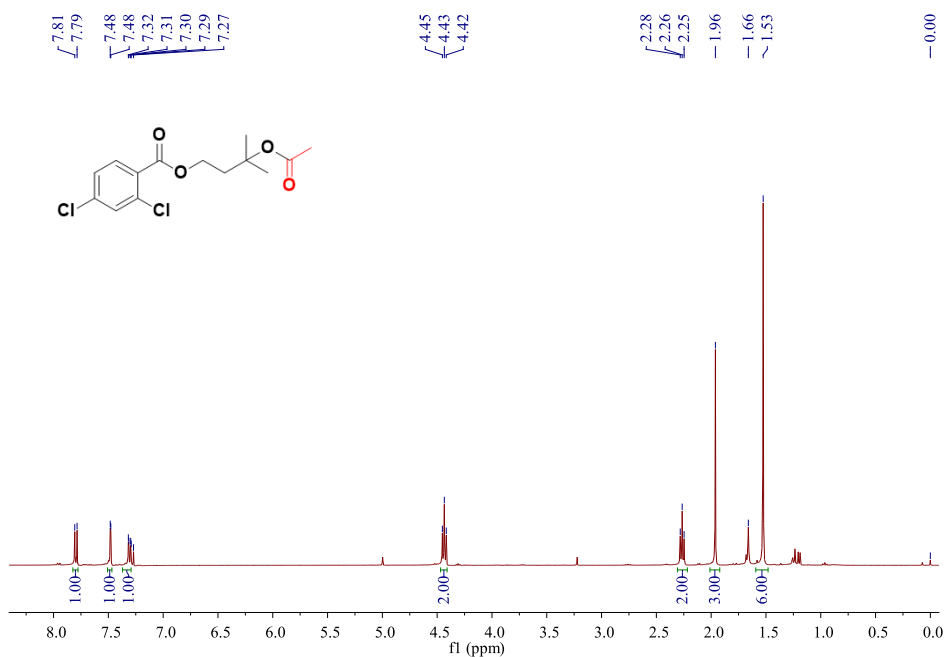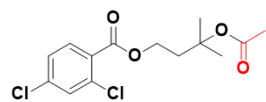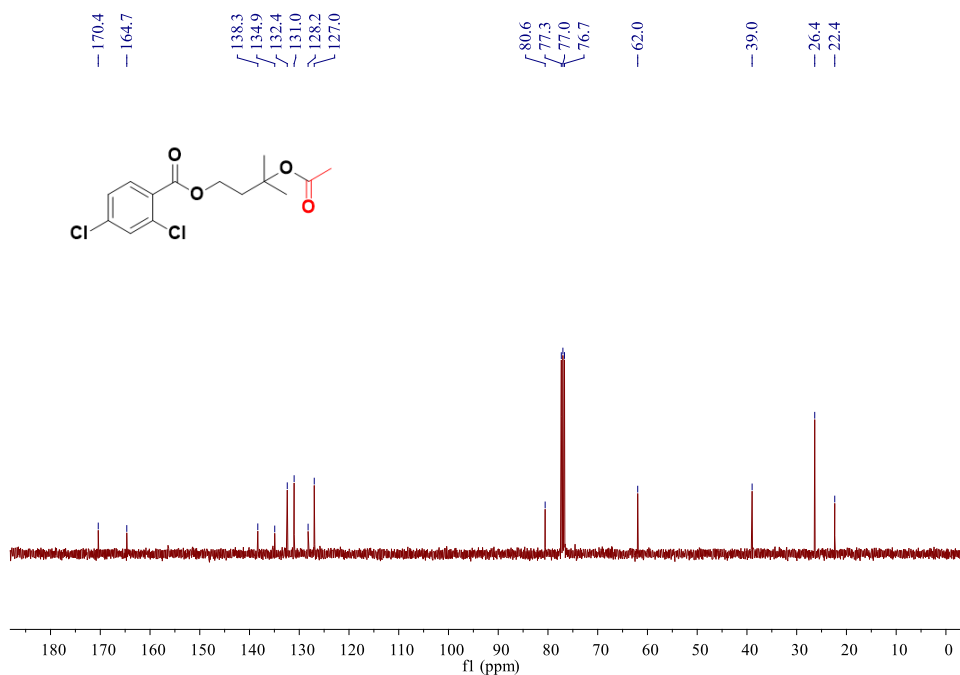

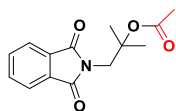

**1-(1,3-Dioxisoindolin-2-yl)-2-methylpropan-2-yl acetate (3bp)**

petroleum ether / ethyl acetate = 10:1, white solid, 70% yield (36.0 mg). mp: 90 – 92°C. <sup>1</sup>H NMR (400 MHz, CDCl<sub>3</sub>) δ 7.90 – 7.85 (m, 2H), 7.77 – 7.72 (m, 2H), 4.07 (s, 2H), 2.01 (s, 3H), 1.50 (s, 6H). <sup>13</sup>C NMR (100 MHz, CDCl<sub>3</sub>) δ 170.7, 168.4, 134.0, 131.9, 123.3, 81.0, 44.8, 24.8, 22.4. HRMS (ESI-TOF): Anal Calcd. For. C<sub>14</sub>H<sub>15</sub>NO<sub>4</sub> + Na<sup>+</sup>: 284.0893, Found: 284.0892. IR (neat, cm<sup>-1</sup>): ν 2850, 1769, 1614, 1515, 1464, 1339, 1224, 1076, 727, 606.

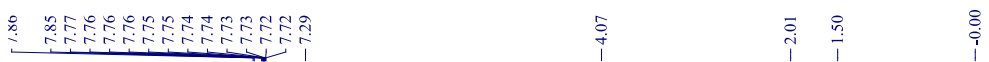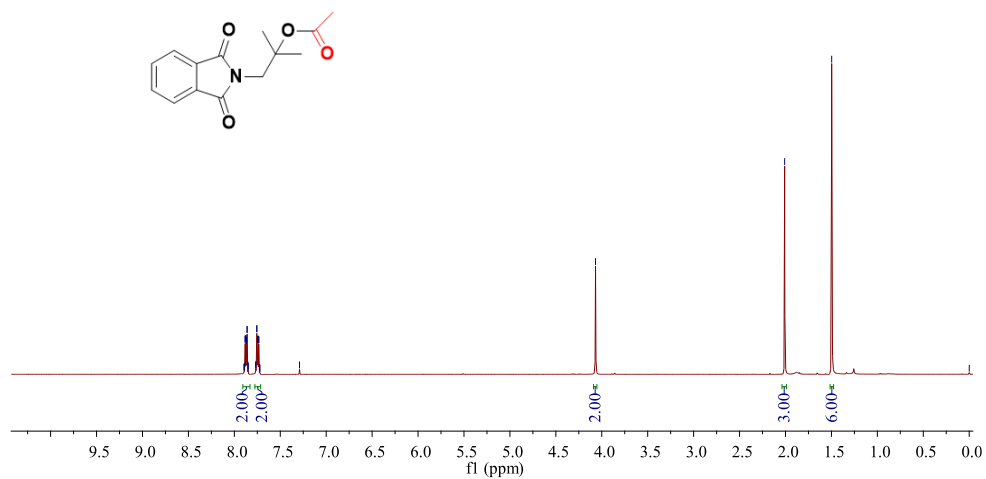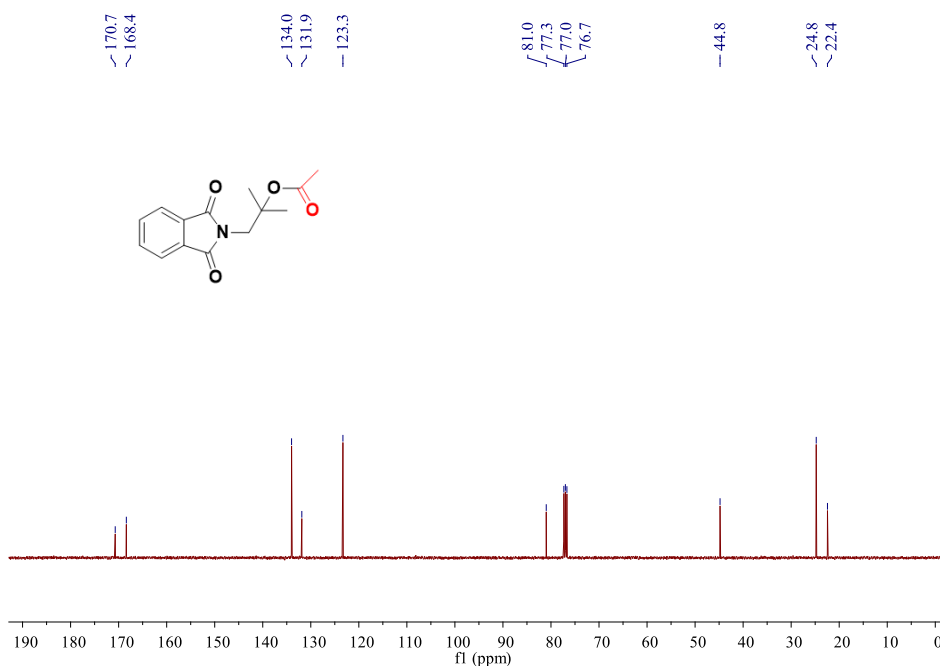

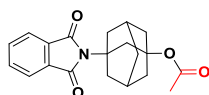

### 3-(1,3-Dioxoisindolin-2-yl)adamantan-1-yl acetate (3bq)

petroleum ether / ethyl acetate = 5:1, white solid, 80% yield (53.5 mg). mp: 103 – 105°C. **<sup>1</sup>H NMR** (400 MHz, CDCl<sub>3</sub>) δ 7.78 – 7.74 (m, 2H), 7.70 – 7.66 (m, 2H), 2.86 (s, 2H), 2.46 (d, *J* = 2.8 Hz, 4H), 2.37 (s, 2H), 2.21 – 2.12 (m, 4H), 1.98 (s, 3H), 1.71 – 1.62 (m, 2H). **<sup>13</sup>C NMR** (100 MHz, CDCl<sub>3</sub>) δ 170.1, 169.4, 133.7, 131.7, 122.6, 80.1, 61.5, 43.8, 39.8, 39.0, 34.7, 30.7, 22.5. **HRMS** (ESI-TOF): Anal Calcd. For. C<sub>20</sub>H<sub>21</sub>NO<sub>4</sub> + Na<sup>+</sup>: 362.1363, Found: 362.1361. **IR** (neat, cm<sup>-1</sup>): ν 2917, 1729, 1697, 1558, 1250, 958, 863, 711, 676.

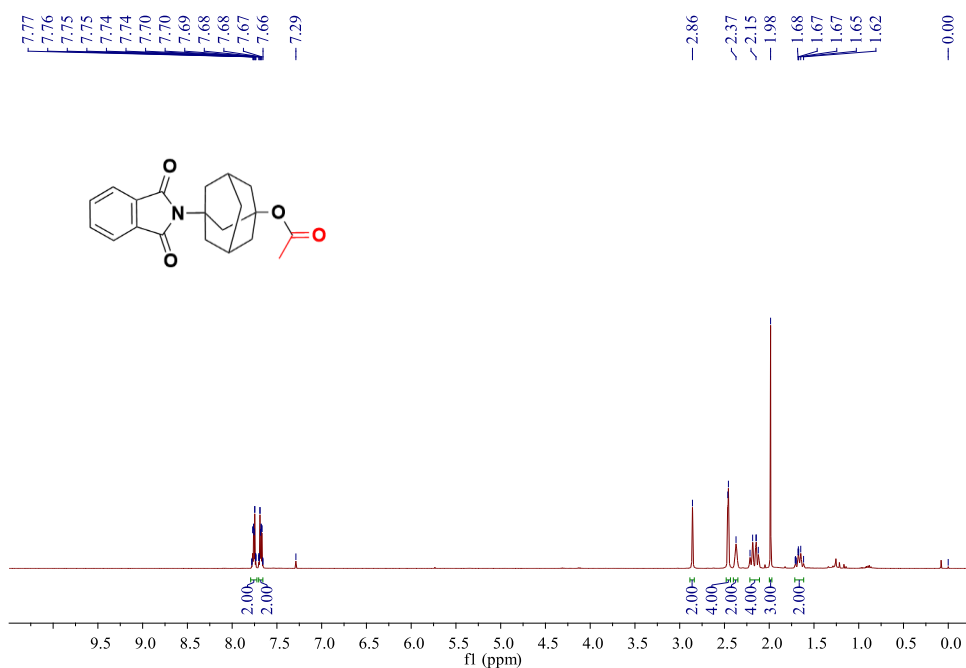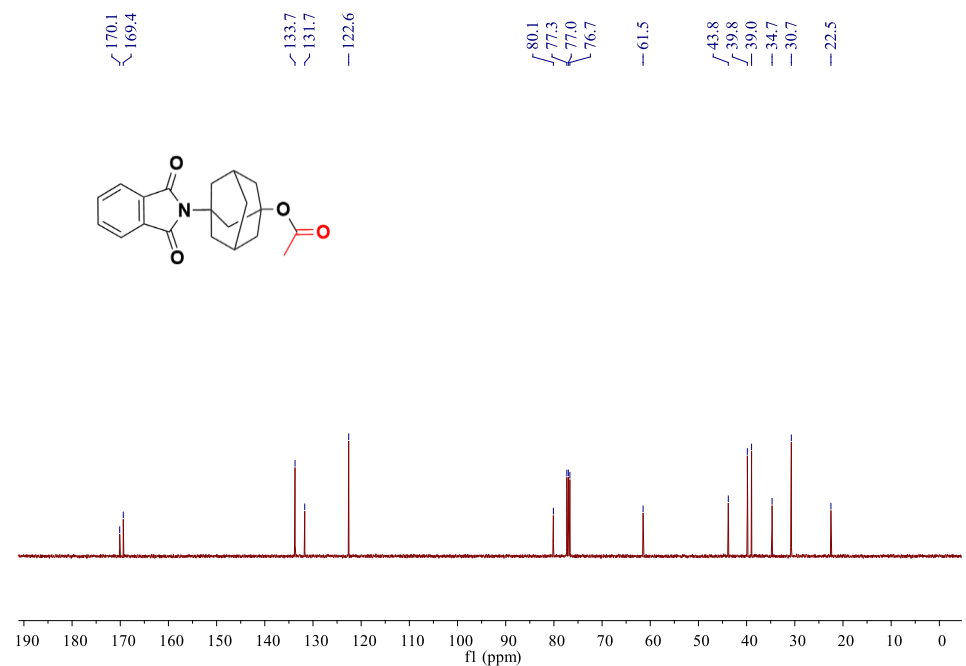

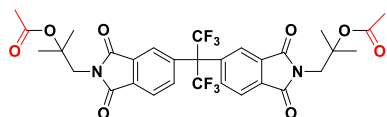

**((Perfluoropropane-2,2-diyl)bis(1,3-dioxoisindoline-5,2-diyl))bis(2-methylpropane-1,2-diyl) diacetate (3br)**

petroleum ether / ethyl acetate = 5:1, white solid, 60% yield (78.4 mg). mp: 145 – 147°C.  $^1\text{H NMR}$  (400 MHz,  $\text{CDCl}_3$ )  $\delta$  7.95 (d,  $J = 8.0$  Hz, 2H), 7.84 – 7.80 (m, 4H), 4.09 (s, 4H), 2.00 (s, 6H), 1.51 (s, 12H).  $^{13}\text{C NMR}$  (100 MHz,  $\text{CDCl}_3$ )  $\delta$  170.7, 167.3, 167.1, 138.8, 135.6, 132.8, 132.5, 124.9, 123.7, 80.9, 45.3, 24.8, 22.5.  $^{19}\text{F NMR}$  (377 MHz,  $\text{CDCl}_3$ )  $\delta$  -63.3 (s, 6F). **HRMS** (ESI-TOF): Anal Calcd. For.  $\text{C}_{31}\text{H}_{28}\text{F}_6\text{N}_2\text{O}_8 + \text{Na}^+$ : 693.1642, Found: 693.1632. **IR** (neat,  $\text{cm}^{-1}$ ):  $\nu$  2942, 1778, 1465, 1426, 1202, 1168, 1016, 727, 606.

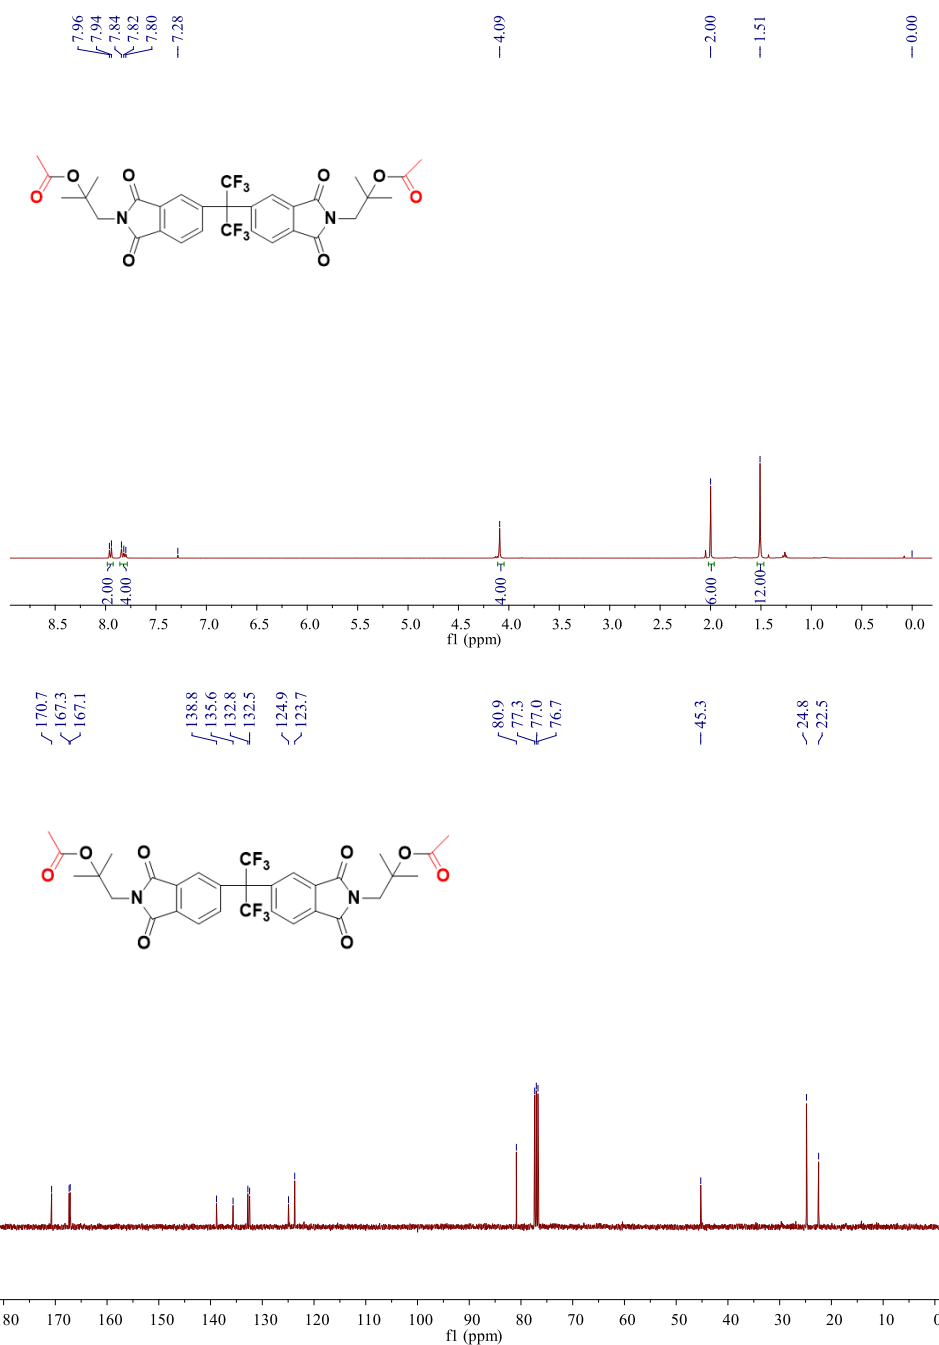

-63.3

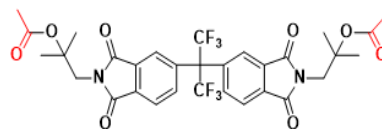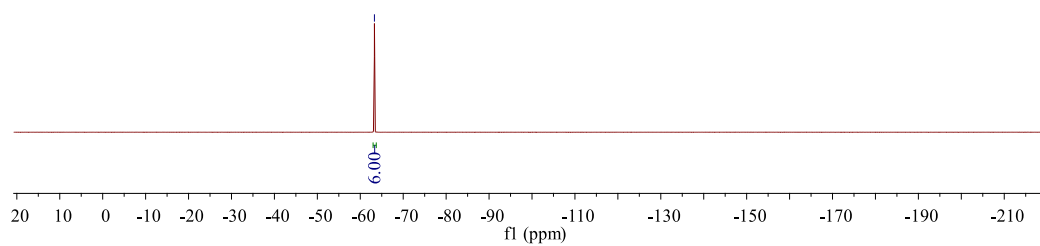

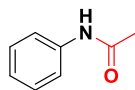

### ***N*-Phenylacetamide (5aa)**

dichloromethane / ethyl acetate = 5:1, white solid, 93% yield (22.0 mg). mp: 113 – 115°C. **<sup>1</sup>H NMR** (400 MHz, DMSO) δ 9.93 (s, 1H), 7.58 – 7.56 (m, 2H), 7.30 – 7.26 (m, 2H), 7.01 (t, *J* = 7.4 Hz, 1H), 2.03 (s, 3H). **<sup>13</sup>C NMR** (100 MHz, DMSO) δ 168.4, 139.4, 128.7, 123.0, 119.0, 24.1. **HRMS** (ESI-TOF): Anal Calcd. For. C<sub>8</sub>H<sub>9</sub>NO +H<sup>+</sup>: 136.0757, Found: 136.0757. **IR** (neat, cm<sup>-1</sup>): ν 3587, 2900, 1732, 1683, 1598, 1496, 1373, 1023, 822, 759, 696.

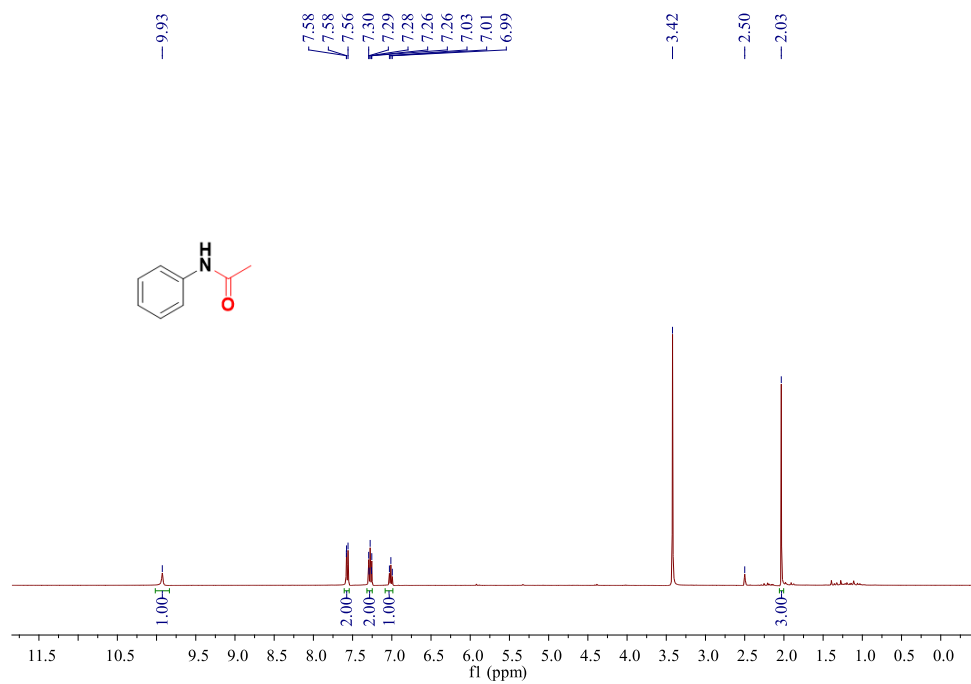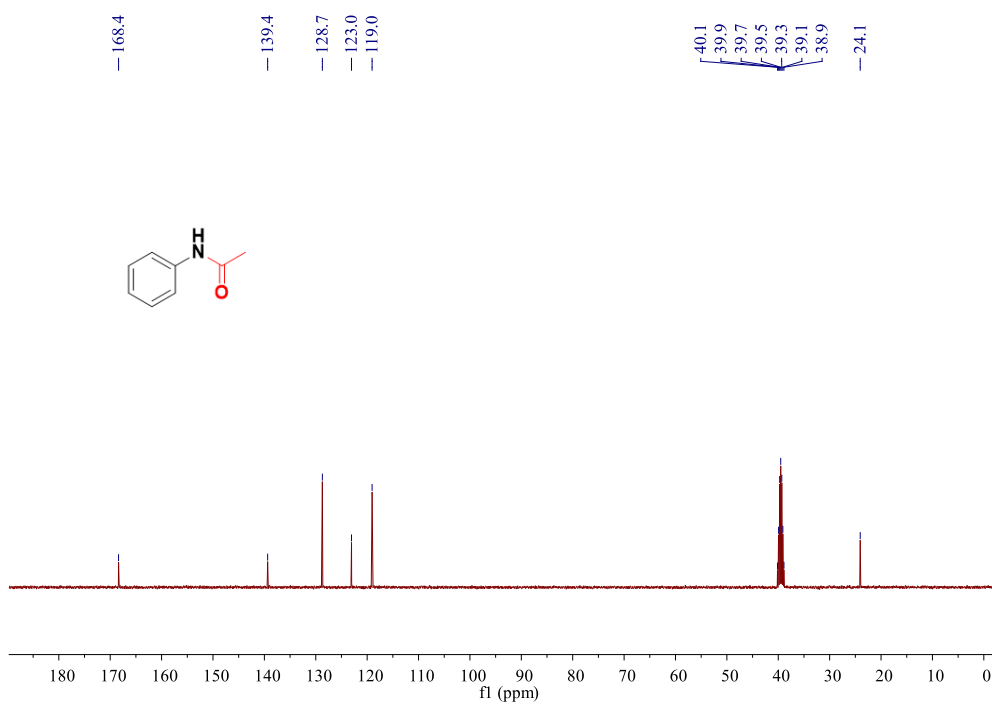

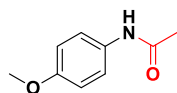

**N-(4-Methoxyphenyl)acetamide (5ab)**

dichloromethane / ethyl acetate = 5:1, yellow solid, 69% yield (20.3 mg). mp: 126 – 128°C. <sup>1</sup>H NMR (400 MHz, DMSO) δ 9.76 (s, 1H), 7.48 – 7.46 (m, 2H), 6.86 – 6.84 (m, 2H), 3.70 (s, 3H), 2.00 (s, 3H). <sup>13</sup>C NMR (100 MHz, DMSO) δ 167.7, 155.0, 132.5, 120.5, 113.8, 55.1, 23.8. HRMS (ESI-TOF): Anal Calcd. For. C<sub>9</sub>H<sub>11</sub>NO<sub>2</sub>+H<sup>+</sup>: 166.0863, Found: 166.0862. IR (neat, cm<sup>-1</sup>): ν 3365, 1645, 1553, 1512, 1246, 1024, 990, 826, 763.

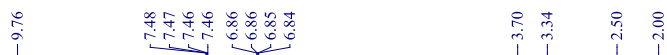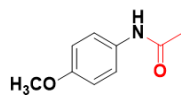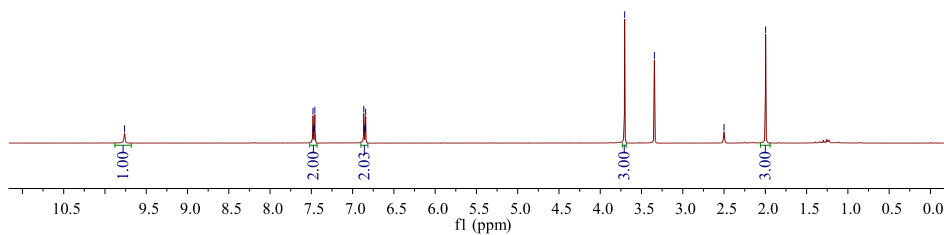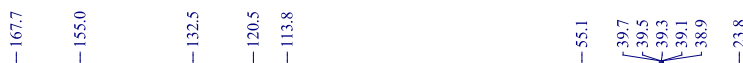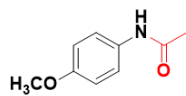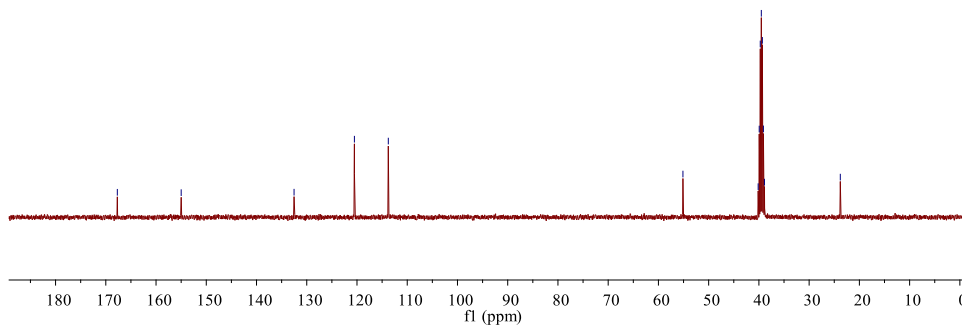

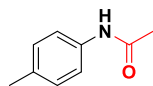

### *N*-(*p*-Tolyl)acetamide (**5ac**)

dichloromethane / ethyl acetate = 5:1, yellow solid, 93% yield (23.6 mg). mp: 151 – 153°C. <sup>1</sup>H NMR (400 MHz, DMSO) δ 9.84 (s, 1H), 7.45 (d, *J* = 8.4 Hz, 2H), 7.07 (d, *J* = 8.4 Hz, 2H), 2.23 (s, 3H), 2.01 (s, 3H). <sup>13</sup>C NMR (100 MHz, DMSO) δ 168.1, 136.9, 131.9, 129.1, 119.1, 24.0, 20.5. HRMS (ESI-TOF): Anal Calcd. For. C<sub>9</sub>H<sub>11</sub>NO+H<sup>+</sup>: 150.0913, Found: 150.0913. IR (neat, cm<sup>-1</sup>): ν 3298, 2976, 1662, 1590, 1488, 922, 816, 729.

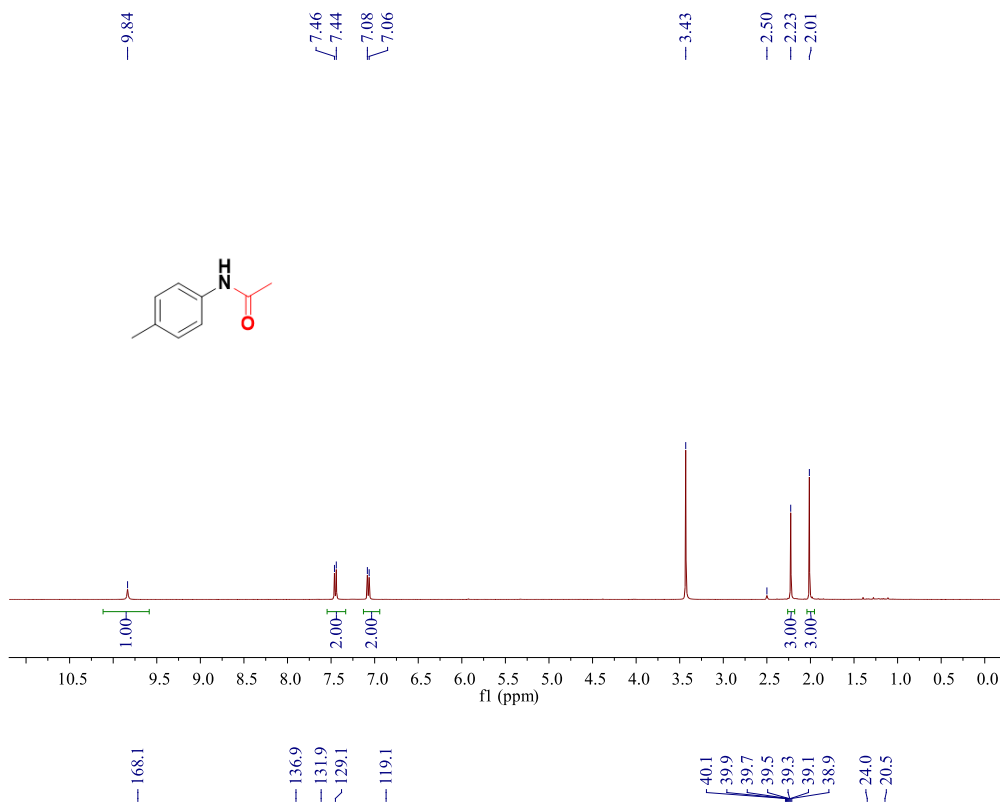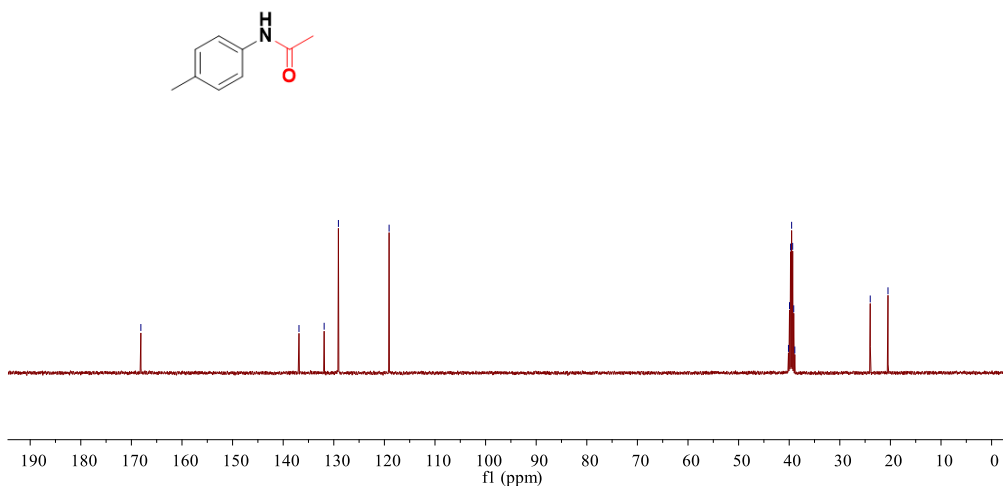



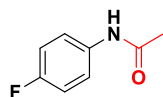

**N-(4-Fluorophenyl)acetamide (5ad)**

dichloromethane / ethyl acetate = 5:1, yellow solid, 83% yield (24.2 mg). mp: 150 – 152°C. <sup>1</sup>H NMR (400 MHz, DMSO) δ 9.97 (s, 1H), 7.60 – 7.56 (m, 2H), 7.14-7.09 (m, 2H), 2.03 (s, 3H). <sup>13</sup>C NMR (100 MHz, DMSO) δ 168.1, 157.8 (d, *J* = 237.0 Hz), 135.7 (d, *J* = 3.0 Hz), 120.7 (d, *J* = 7.0 Hz), 115.2 (d, *J* = 22 Hz), 23.9. <sup>19</sup>F NMR (377 MHz, DMSO) δ -119.8 (s, 1F). HRMS (ESI-TOF): Anal Calcd. For. C<sub>8</sub>H<sub>8</sub>FNO+H<sup>+</sup>: 154.0663, Found: 154.0661: IR (neat, cm<sup>-1</sup>): ν 3360, 1645, 1509, 1406, 1377, 1213, 1024, 989, 826.

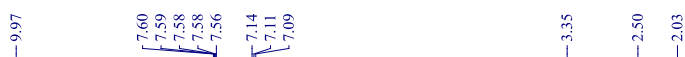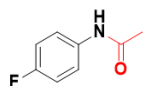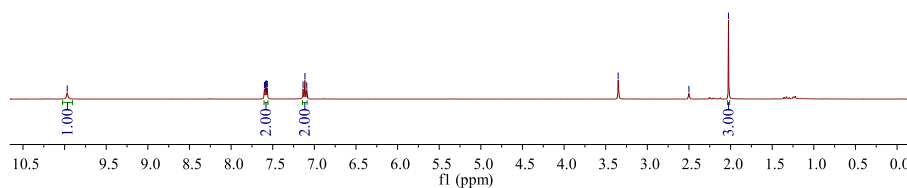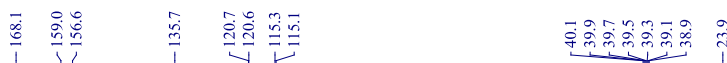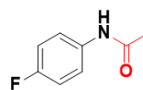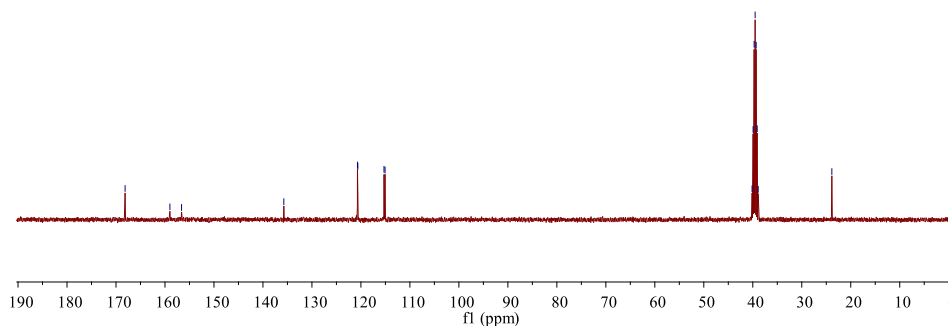

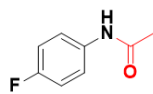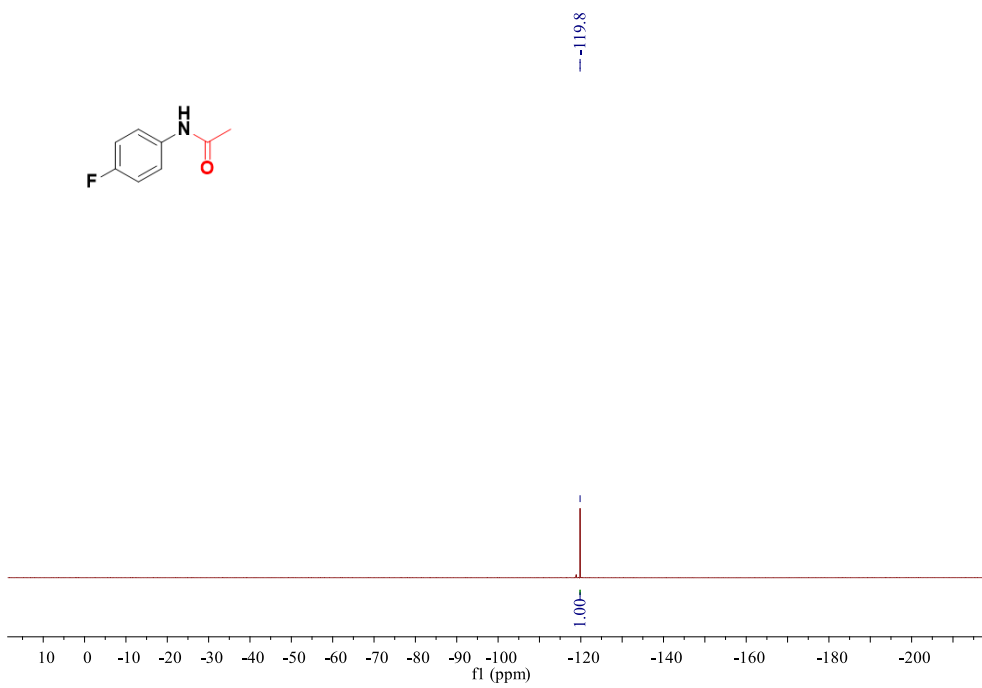

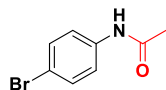

### *N*-(4-Bromophenyl)acetamide (5ae)

dichloromethane / ethyl acetate = 5:1, yellow solid, 85% yield (36.2 mg). mp: 168 – 170°C. **<sup>1</sup>H NMR** (400 MHz, DMSO) δ 10.05 (s, 1H), 7.56 – 7.44 (m, 4H), 2.04 (s, 3H). **<sup>13</sup>C NMR** (100 MHz, DMSO) δ 168.4, 138.7, 131.4, 120.8, 114.5, 24.0. **HRMS** (ESI-TOF): Anal Calcd. For. C<sub>8</sub>H<sub>8</sub><sup>79</sup>BrNO+H<sup>+</sup>: 213.9862, Found: 213.9860; C<sub>8</sub>H<sub>8</sub><sup>81</sup>BrNO+H<sup>+</sup>: 215.9842, Found: 215.9840. **IR** (neat, cm<sup>-1</sup>): ν 3376, 2851, 1649, 1538, 1491, 1396, 1258, 1046, 991, 825, 763.

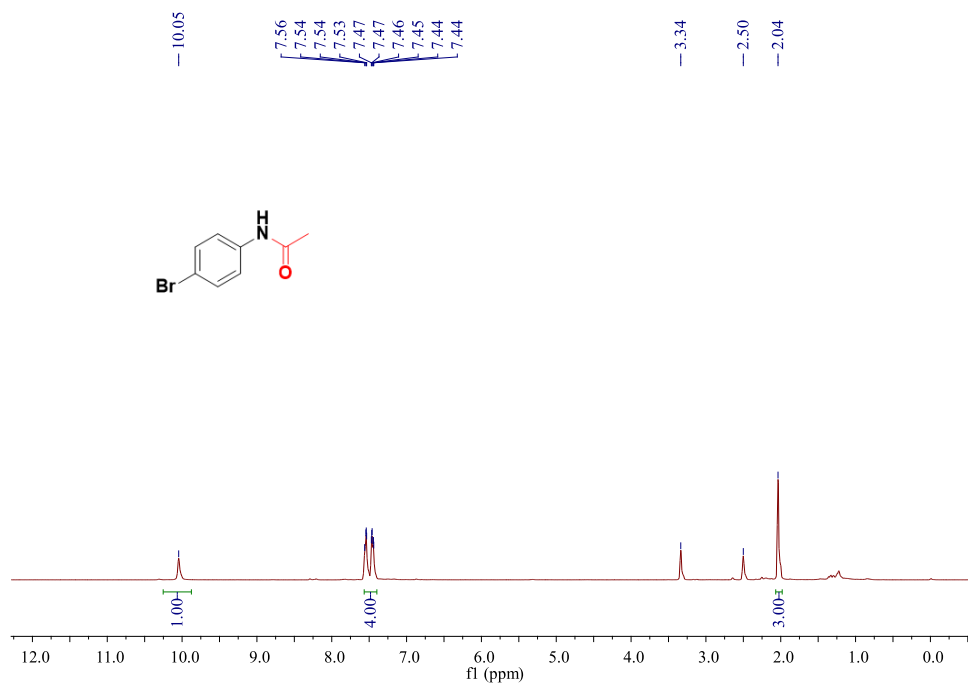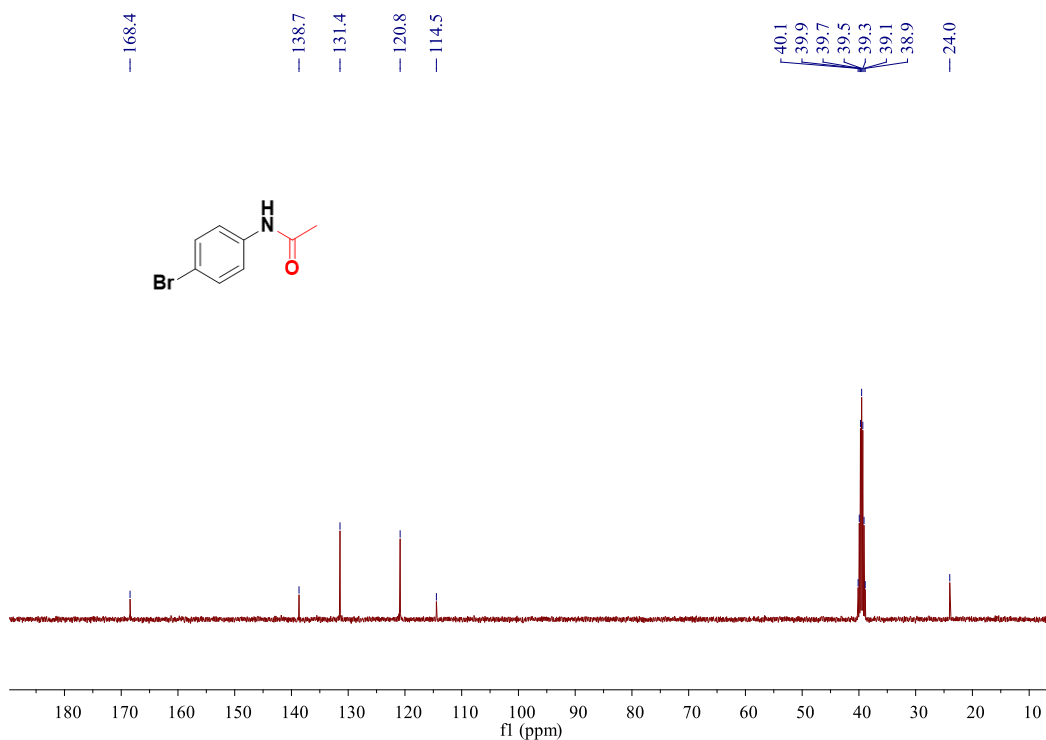

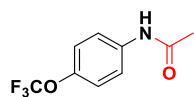

***N*-(4-(Trifluoromethoxy)phenyl)acetamide (5af)**

dichloromethane / ethyl acetate = 5:1, yellow solid, 90% yield (39.6 mg). mp: 113 – 115°C. <sup>1</sup>H NMR (400 MHz, DMSO) δ 10.14 (s, 1H), 7.69 – 7.67 (m, 2H), 7.28 – 7.25 (m, 2H), 2.05 (s, 3H). <sup>13</sup>C NMR (100 MHz, CDCl<sub>3</sub>) δ 169.3, 145.3, 136.7, 121.6, 121.4, 120.5 (q, *J* = 255 Hz), 24.2. <sup>19</sup>F NMR (377 MHz, DMSO) δ -57.1 (s, 1F). **HRMS** (ESI-TOF): Anal Calcd. For. C<sub>9</sub>H<sub>8</sub>F<sub>3</sub>NO<sub>2</sub>+H<sup>+</sup>: 220.0580, Found: 220.0578. **IR** (neat, cm<sup>-1</sup>): ν 3378, 3270, 1665, 1618, 1556, 1508, 1154, 992, 825, 762, 659.

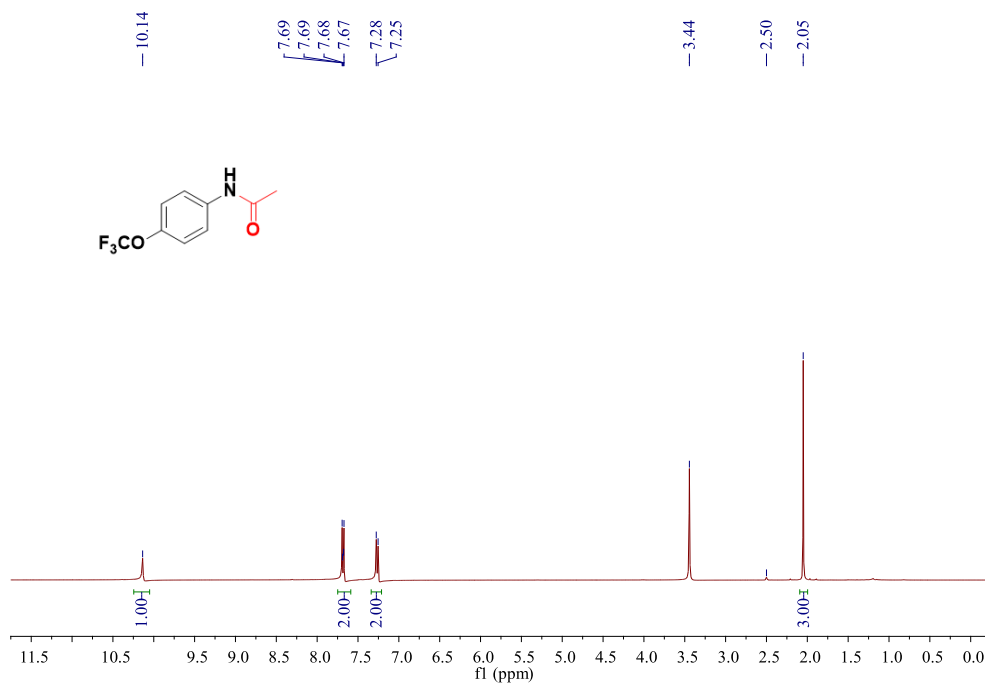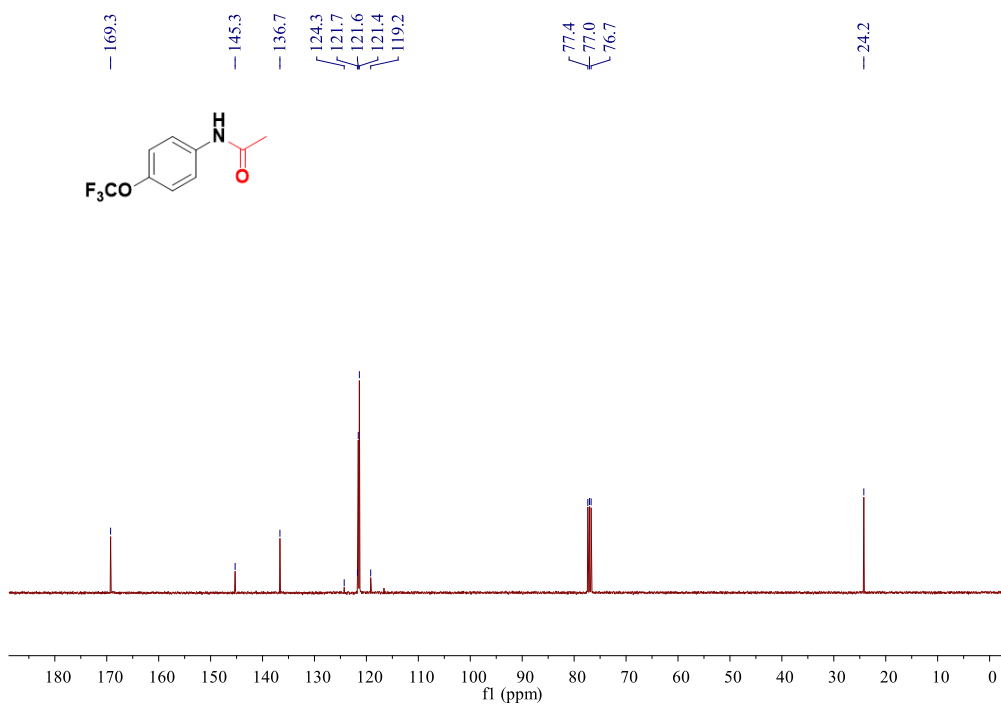

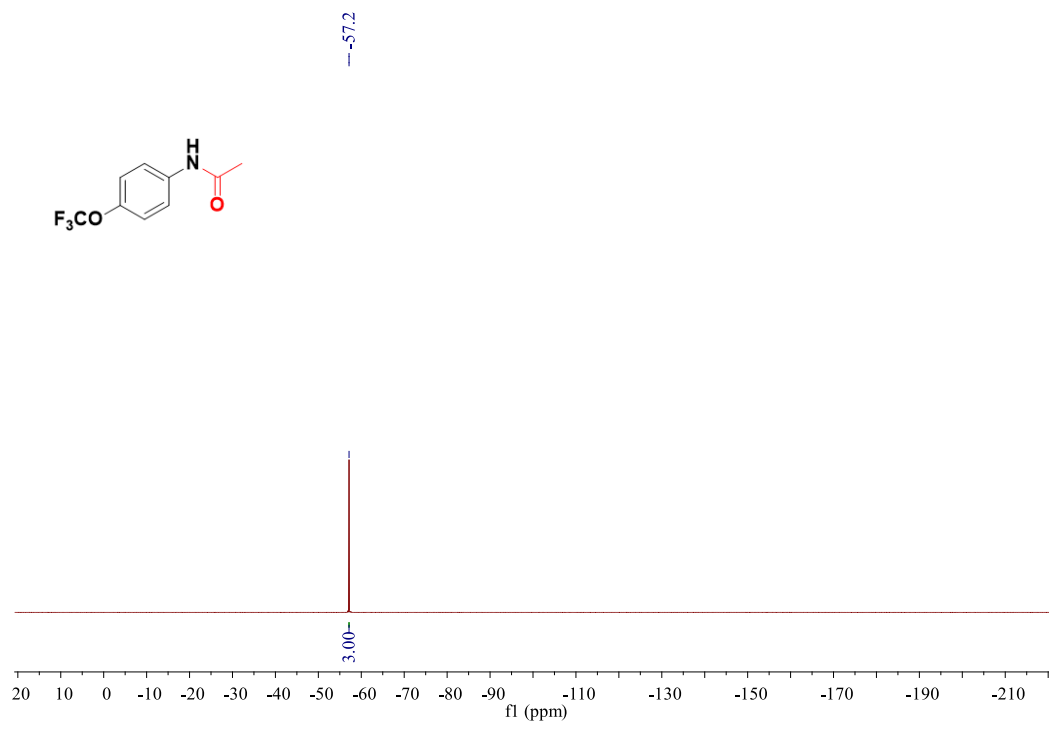

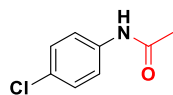

***N*-(4-Chlorophenyl)acetamide (5ag)**

dichloromethane / ethyl acetate = 5:1, yellow solid, 86% yield (29.0 mg). mp: 177 – 179°C. <sup>1</sup>H NMR (400 MHz, DMSO) δ 10.05 (s, 1H), 7.61 – 7.59 (m, 2H), 7.34 – 7.32 (m, 2H), 2.04 (s, 3H). <sup>13</sup>C NMR (100 MHz, DMSO) δ 168.4, 138.3, 128.5, 126.5, 120.5, 24.0. HRMS (ESI-TOF): Anal Calcd. For. C<sub>8</sub>H<sub>8</sub><sup>35</sup>ClNO+H<sup>+</sup>: 170.0367, Found: 170.0366; C<sub>8</sub>H<sub>8</sub><sup>37</sup>ClNO+H<sup>+</sup>: 172.0338, Found: 172.0340. IR (neat, cm<sup>-1</sup>): ν 3393, 2920, 1658, 1547, 1487, 1392, 1258, 1092, 996, 821, 709.

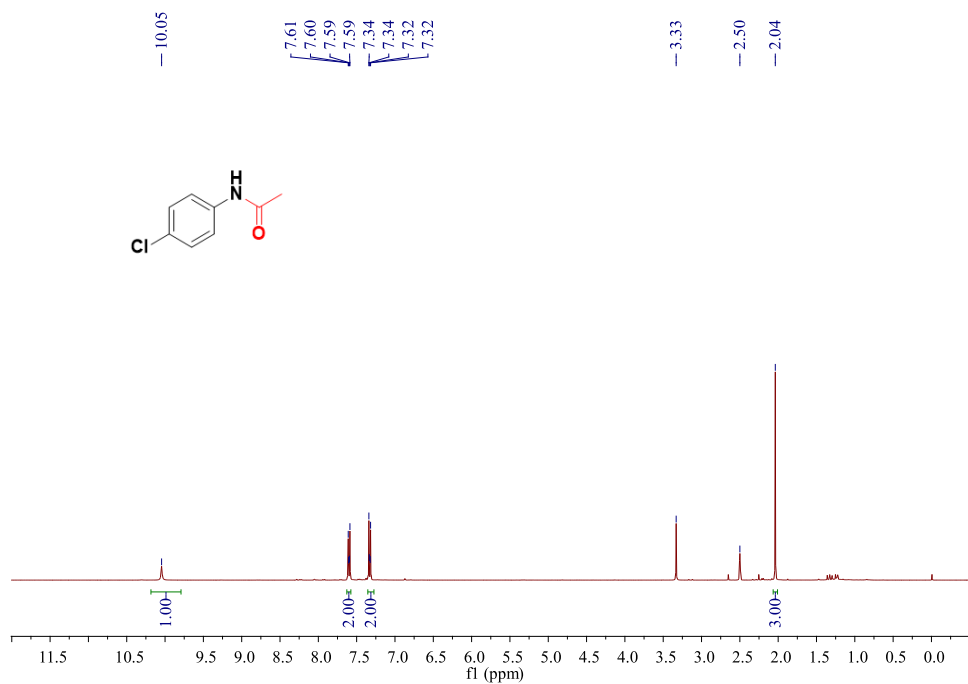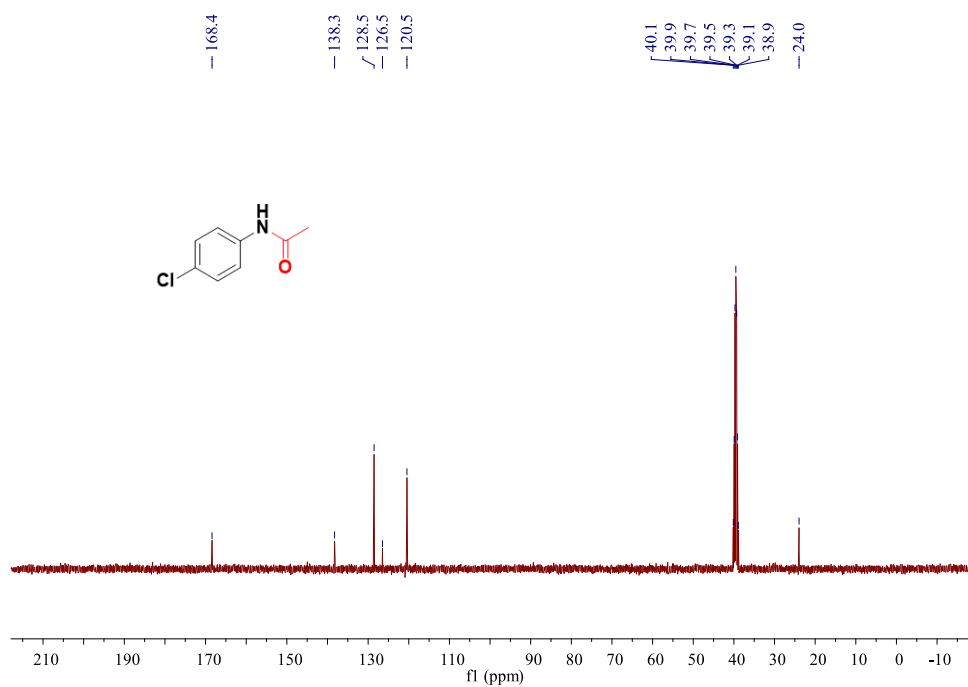

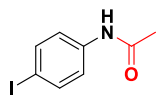

### ***N*-(4-Iodophenyl)acetamide (5ah)**

dichloromethane / ethyl acetate = 5:1, yellow solid, 77% yield (40.0 mg). mp: 180 – 182°C. **<sup>1</sup>H NMR** (400 MHz, DMSO) δ 10.01 (s, 1H), 7.62 – 7.60 (m, 2H), 7.43 – 7.40 (m, 2H), 2.03 (s, 3H). **<sup>13</sup>C NMR** (100 MHz, DMSO) δ 168.5, 139.1, 137.3, 121.2, 86.3, 24.0. **HRMS** (ESI-TOF): Anal Calcd. For. C<sub>8</sub>H<sub>8</sub>I<sub>1</sub>NO+H<sup>+</sup>: 261.9723, Found: 261.9721. **IR** (neat, cm<sup>-1</sup>): ν 3392, 2958, 2849, 1663, 1596, 1579, 1482, 1253, 1024, 992, 814, 731, 679.

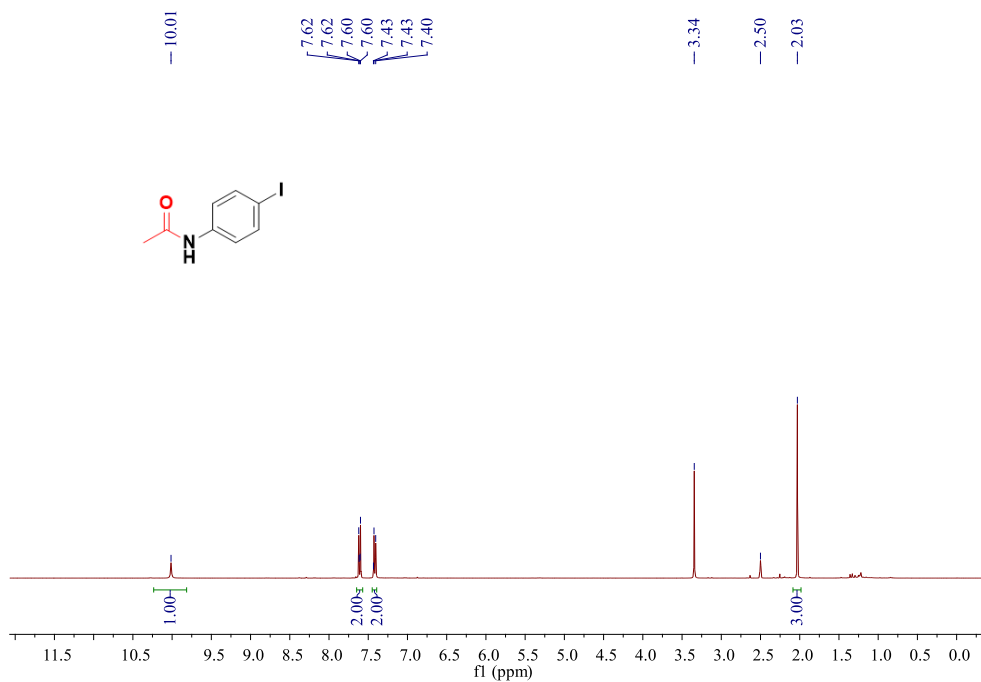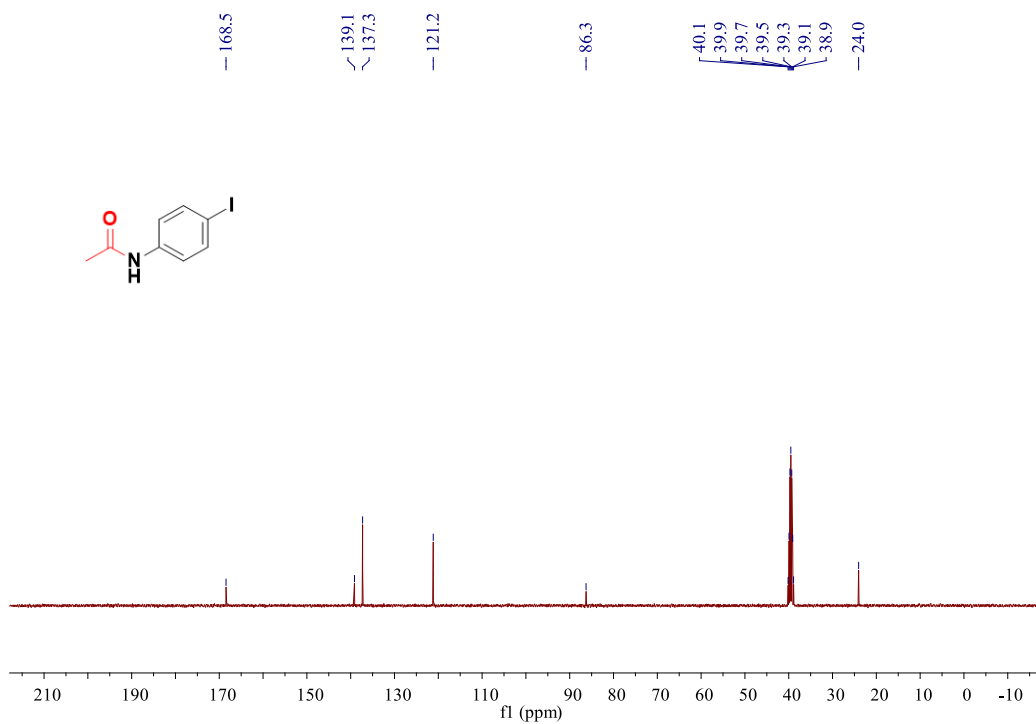

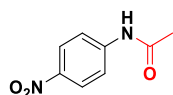

### *N*-(4-Nitrophenyl)acetamide (5ai)

dichloromethane / ethyl acetate = 5:1, yellow solid, 46% yield (16.7 mg). mp: 208 – 210°C. <sup>1</sup>H NMR (400 MHz, DMSO) δ 10.56 (s, 1H), 8.21 – 8.18 (m, 2H), 7.83 – 7.79 (m, 2H), 2.11 (s, 3H). <sup>13</sup>C NMR (100 MHz, DMSO) δ 169.4, 145.5, 142.0, 125.0, 118.6, 24.3. HRMS (ESI-TOF): Anal Calcd. For. C<sub>8</sub>H<sub>8</sub>N<sub>2</sub>O<sub>3</sub>+H<sup>+</sup>: 181.0608, Found: 181.0606. IR (neat, cm<sup>-1</sup>): ν 3414, 1654, 1616, 1597, 1264, 1023, 859, 759.

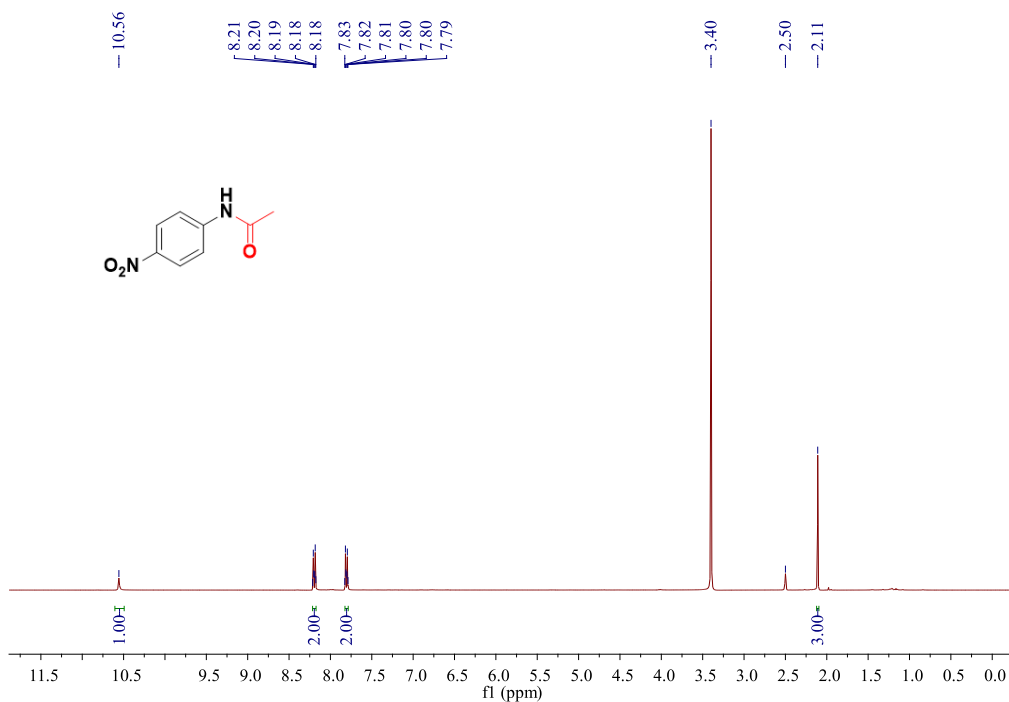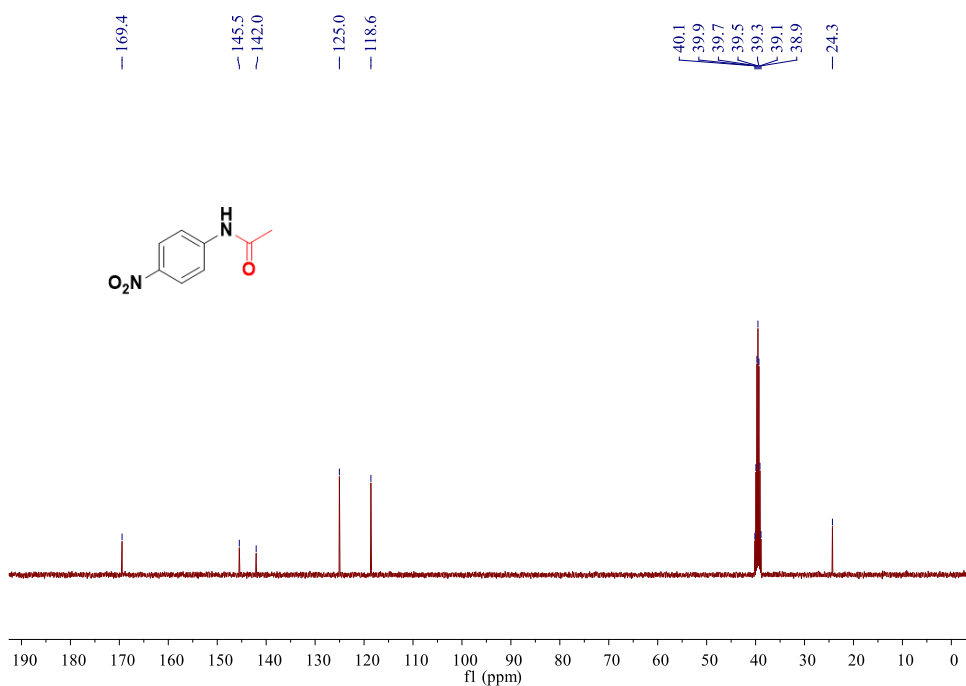



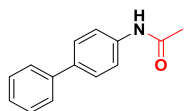

**N-([1,1'-Biphenyl]-4-yl)acetamide (5aj)**

petroleum ether / ethyl acetate = 10:1, yellow solid, 67% yield (28.3 mg). mp: 171 – 173°C. <sup>1</sup>H NMR (400 MHz, DMSO) δ 10.06 (s, 1H), 7.70 (d, *J* = 8.7 Hz, 2H), 7.64 – 7.60 (m, 4H), 7.43 (t, *J* = 7.7 Hz, 2H), 7.31 (t, *J* = 7.7 Hz, 1H), 2.08 (s, 1H). <sup>13</sup>C NMR (100 MHz, DMSO) δ 168.4, 139.8, 138.9, 134.7, 128.9, 127.0, 126.9, 126.2, 119.4, 24.1. HRMS (ESI-TOF): Anal Calcd. For. C<sub>14</sub>H<sub>13</sub>NO+H<sup>+</sup>: 212.1070, Found: 212.1069. IR (neat, cm<sup>-1</sup>): ν 3354, 2963, 1672, 1600, 1538, 1452, 1199, 1007, 895, 758, 685.

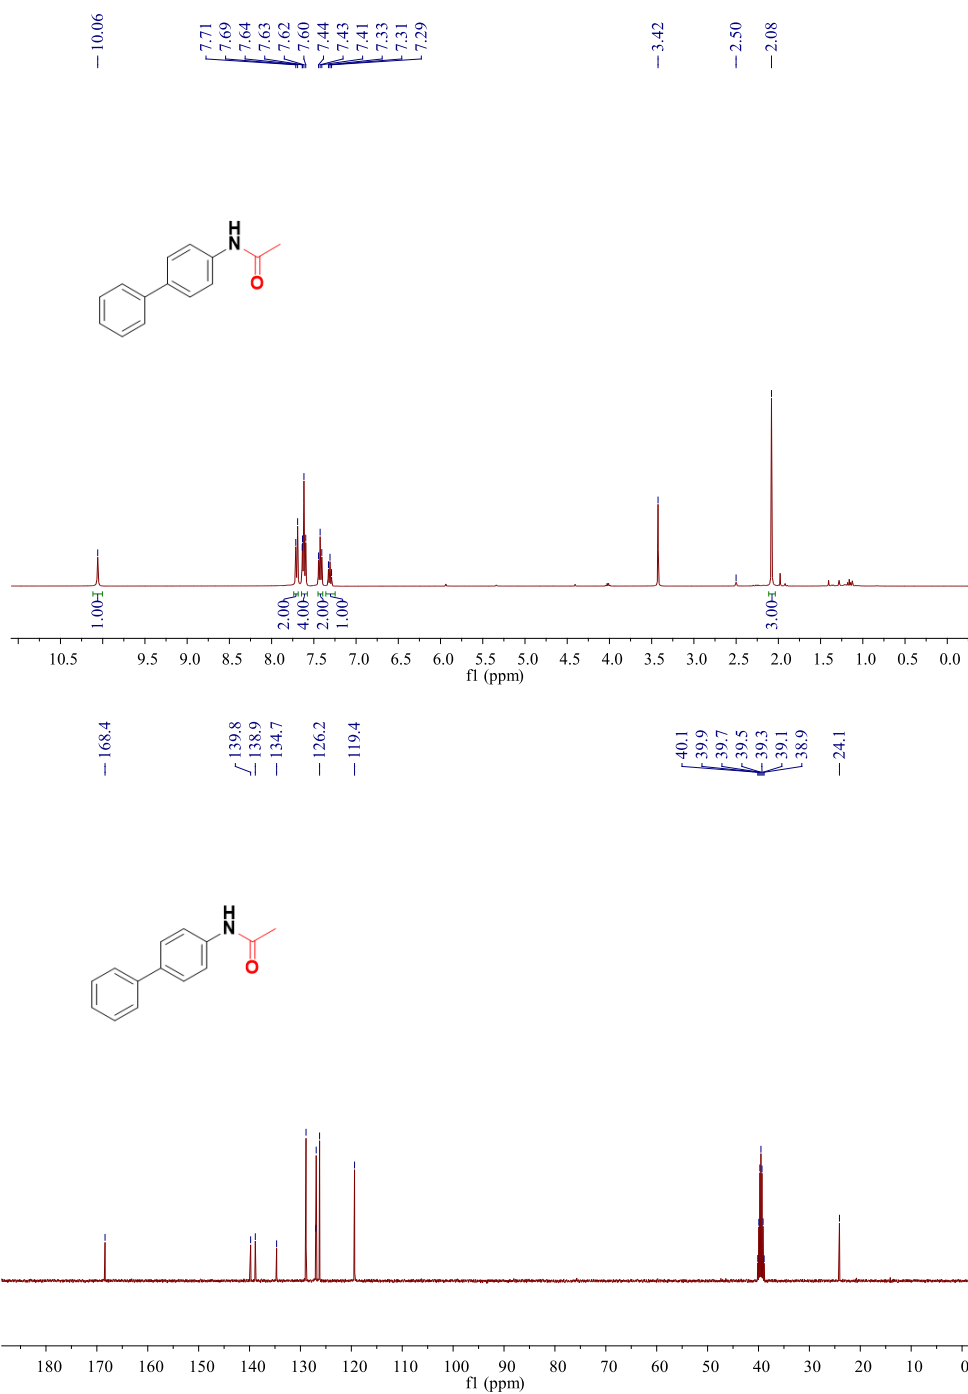

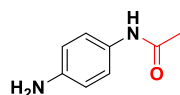

### *N*-(4-Aminophenyl)acetamide (5ak)

petroleum ether / ethyl acetate = 2:1, yellow solid, 64% yield (19.2 mg). mp: 126 – 128°C. <sup>1</sup>H NMR (400 MHz, DMSO) δ 9.47 (s, 1H), 7.18 (d, *J* = 8.7 Hz, 2H), 6.48 (d, *J* = 8.7 Hz, 2H), 4.81 (s, 2H), 1.95 (s, 3H). <sup>13</sup>C NMR (100 MHz, DMSO) δ 167.3, 144.6, 128.6, 120.9, 113.8, 23.7. HRMS (ESI-TOF): Anal Calcd. For. C<sub>8</sub>H<sub>10</sub>N<sub>2</sub>O+H<sup>+</sup>: 151.0866, Found: 151.0865. IR (neat, cm<sup>-1</sup>): ν 3357, 3305, 1641, 1553, 1429, 1264, 1024, 989, 826.

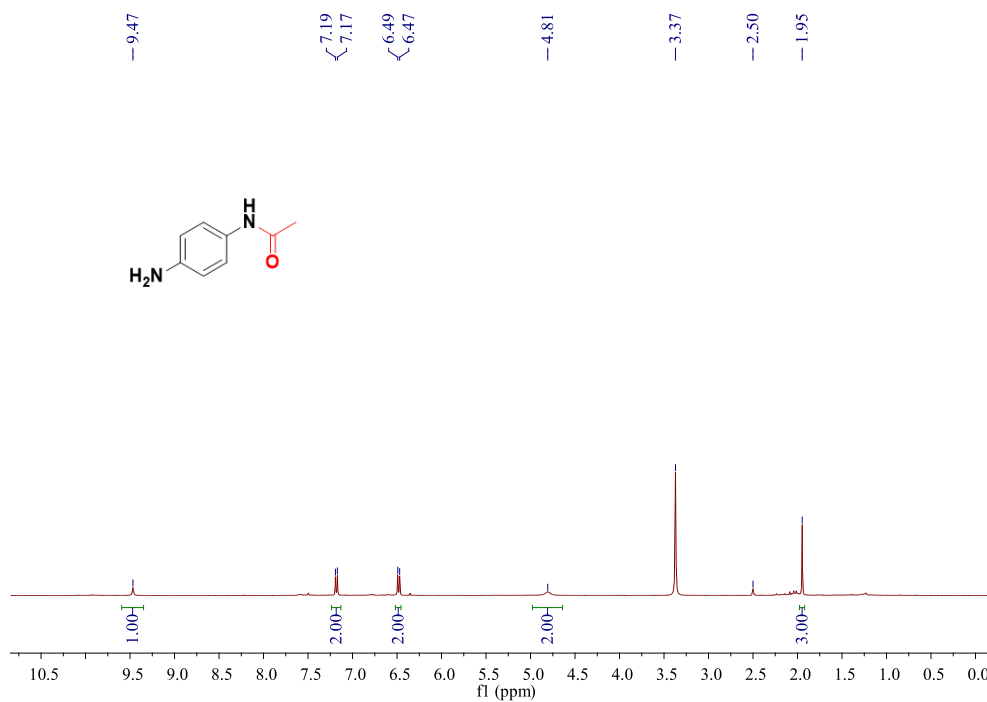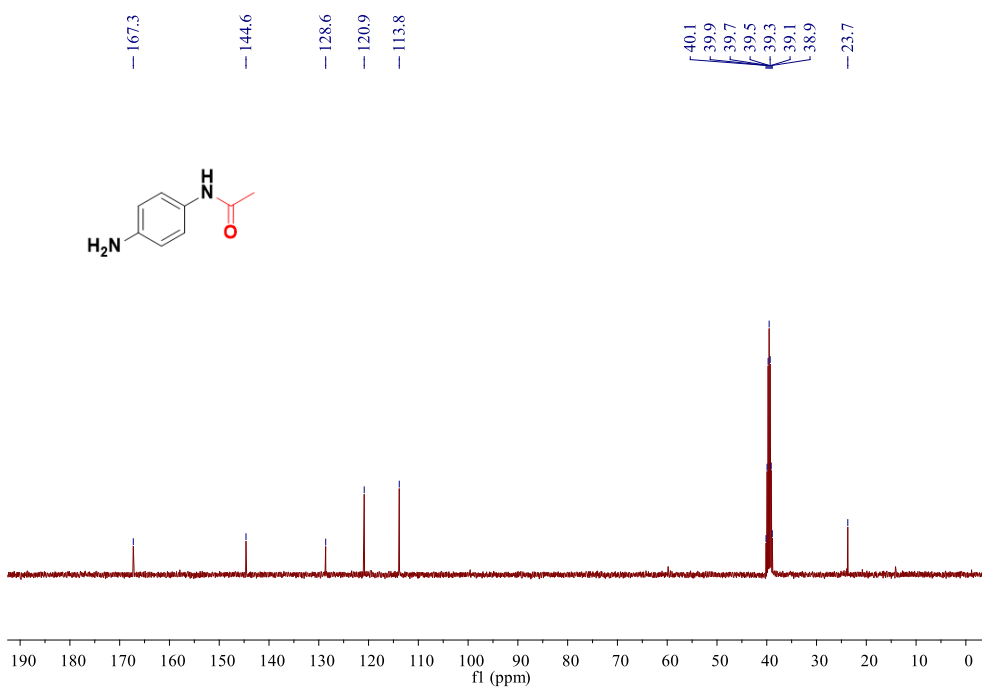

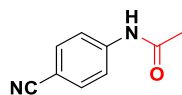

***N*-(4-Cyanophenyl)acetamide (5a1)**

petroleum ether / ethyl acetate = 2:1, yellow solid, 73% yield (23.5 mg). mp: 200 – 203°C. **<sup>1</sup>H NMR** (400 MHz, DMSO) δ 10.36 (s, 1H), 7.75 (s, 4H), 2.09 (s, 3H). **<sup>13</sup>C NMR** (100 MHz, DMSO) δ 169.2, 143.5, 133.2, 119.1, 118.9, 104.7, 24.2. **HRMS** (ESI-TOF): Anal Calcd. For. C<sub>9</sub>H<sub>8</sub>N<sub>2</sub>O+H<sup>+</sup>: 161.0709, Found: 161.0710. **IR** (neat, cm<sup>-1</sup>): ν 3301, 3257, 2924, 2221, 1666, 1596, 1403, 1319, 1203, 1024, 996, 818, 714, 648.

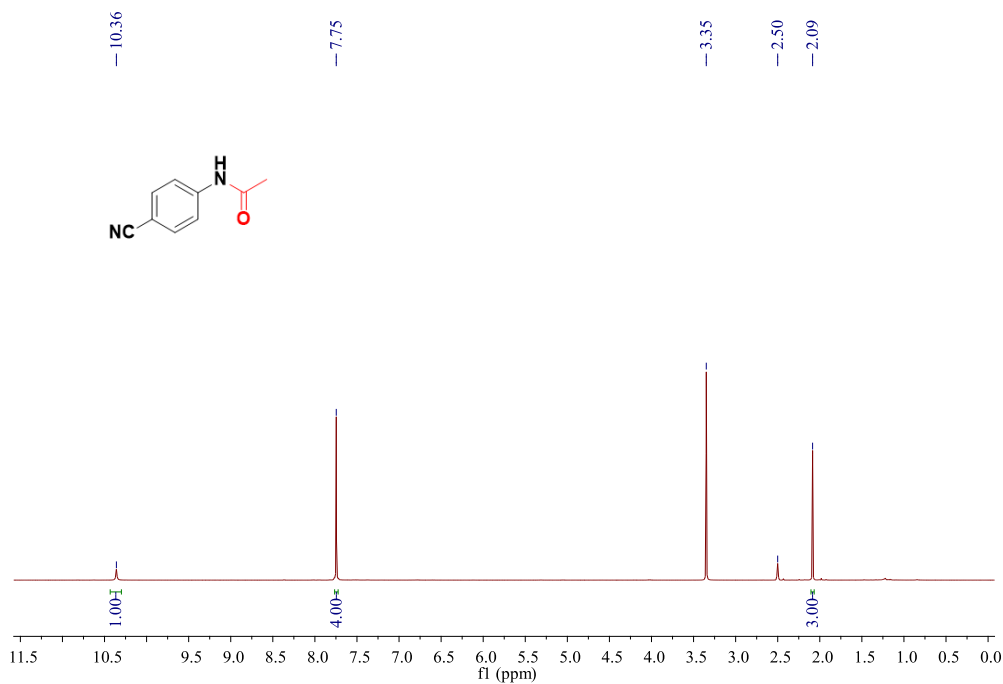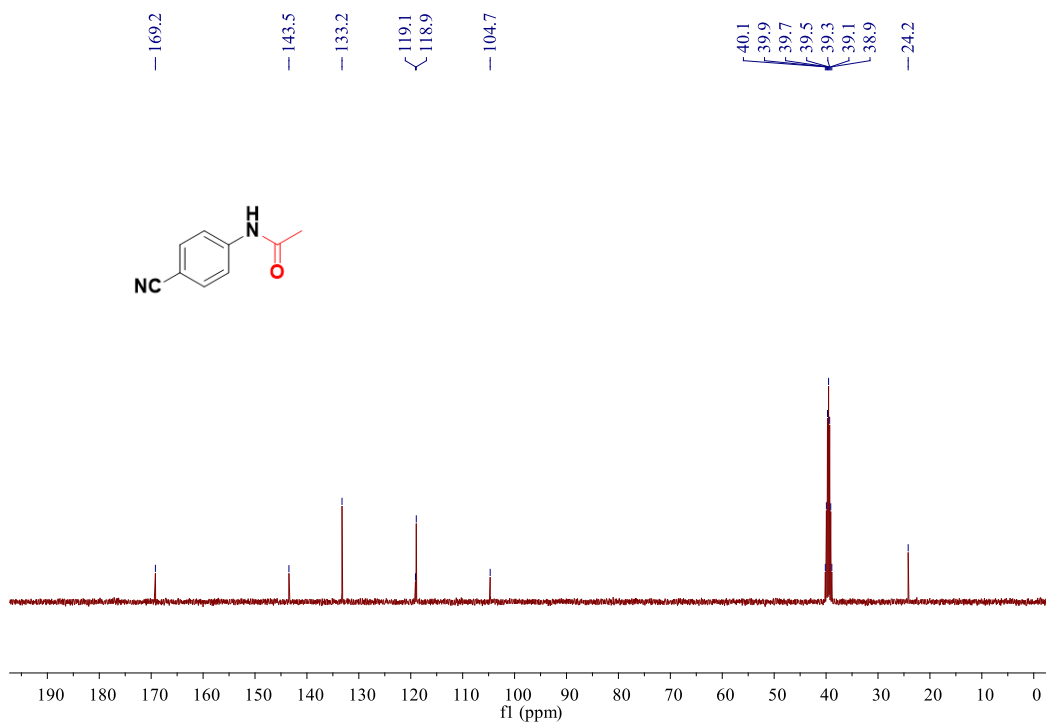

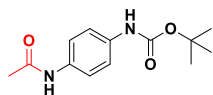

### Tert-butyl (4-acetamidophenyl)carbamate (5am)

petroleum ether / ethyl acetate = 2:1, yellow solid, 45% yield (22.5 mg). mp: 161 – 163°C. **<sup>1</sup>H NMR** (400 MHz, DMSO) δ 9.78 (s, 1H), 9.19 (s, 1H), 7.43 (d, *J* = 9.0 Hz, 2H), 7.34 (d, *J* = 9.0 Hz, 2H), 2.00 (s, 3H), 1.46 (s, 9H). **<sup>13</sup>C NMR** (100 MHz, DMSO) δ 167.9, 152.9, 134.8, 133.9, 119.5, 118.5, 78.8, 28.2, 23.8. **HRMS** (ESI-TOF): Anal Calcd. For. C<sub>13</sub>H<sub>18</sub>N<sub>2</sub>O<sub>3</sub>+H<sup>+</sup>: 251.1390, Found: 251.1388. **IR** (neat, cm<sup>-1</sup>): ν 3426, 2850, 1716, 1671, 1518, 1404, 1242, 1026, 909, 727, 646.

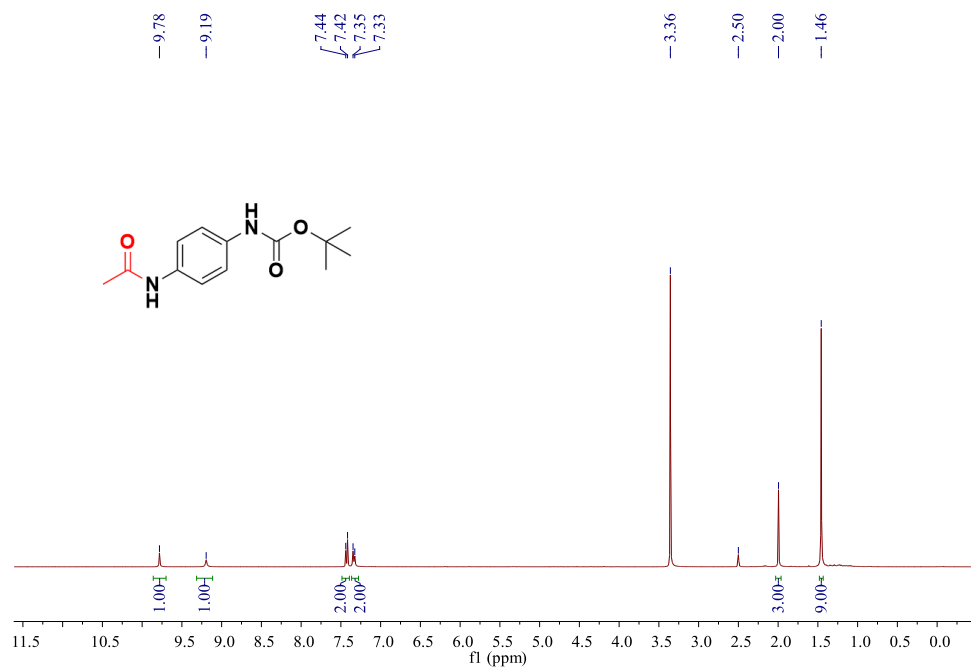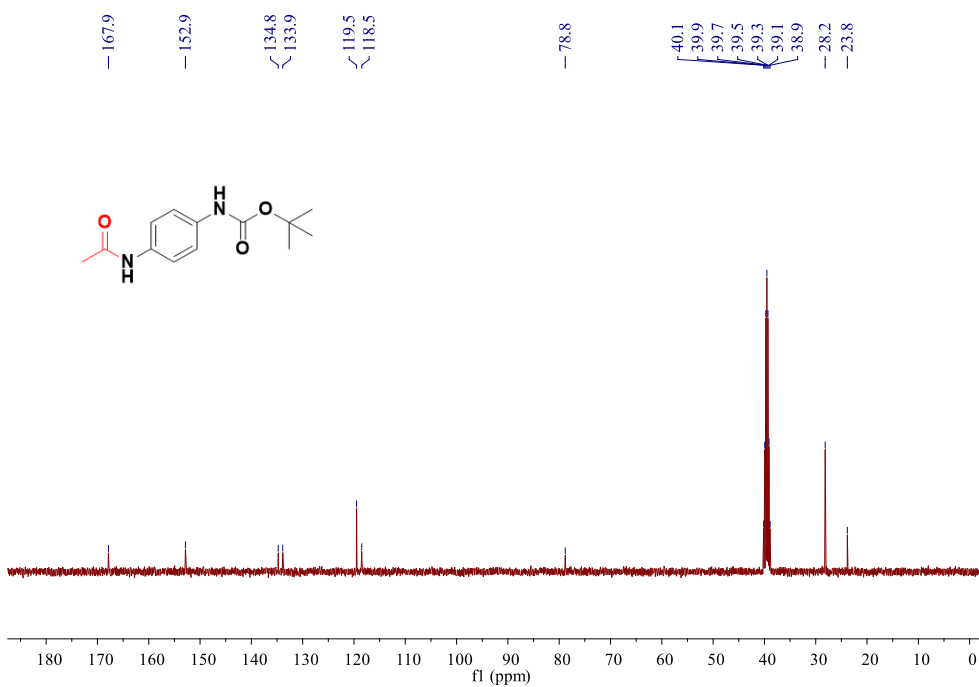

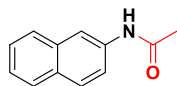

### ***N*-(Naphthalen-2-yl)acetamide (5an)**

dichloromethane / ethyl acetate = 5:1, yellow solid, 90% yield (33.4 mg). mp: 134 – 136°C. <sup>1</sup>H NMR (400 MHz, DMSO) δ 10.15 (s, 1H), 8.28 (d, *J* = 2.0 Hz, 1H), 7.81 (dd, *J* = 17.7, 8.8 Hz, 3H), 7.56 (dd, *J* = 8.8, 2.0 Hz, 1H), 7.47 – 7.43 (m, 1H), 7.40 – 7.36 (m, 1H), 2.10 (s, 3H). <sup>13</sup>C NMR (100 MHz, DMSO) δ 168.7, 136.9, 133.5, 129.7, 128.3, 127.5, 127.3, 126.4, 124.5, 119.9, 114.9, 24.2. HRMS (ESI-TOF): Anal Calcd. For. C<sub>12</sub>H<sub>11</sub>NO+H<sup>+</sup>: 186.0913, Found: 186.0913. IR (neat, cm<sup>-1</sup>): ν 3405, 3293, 1670, 1527, 1489, 1393, 1258, 1049, 823, 760.

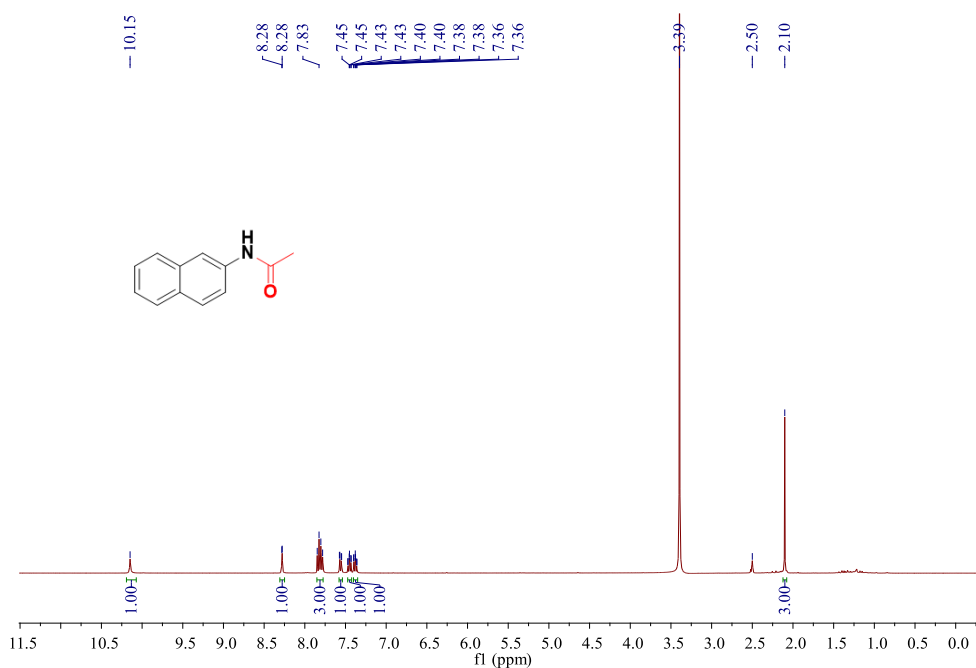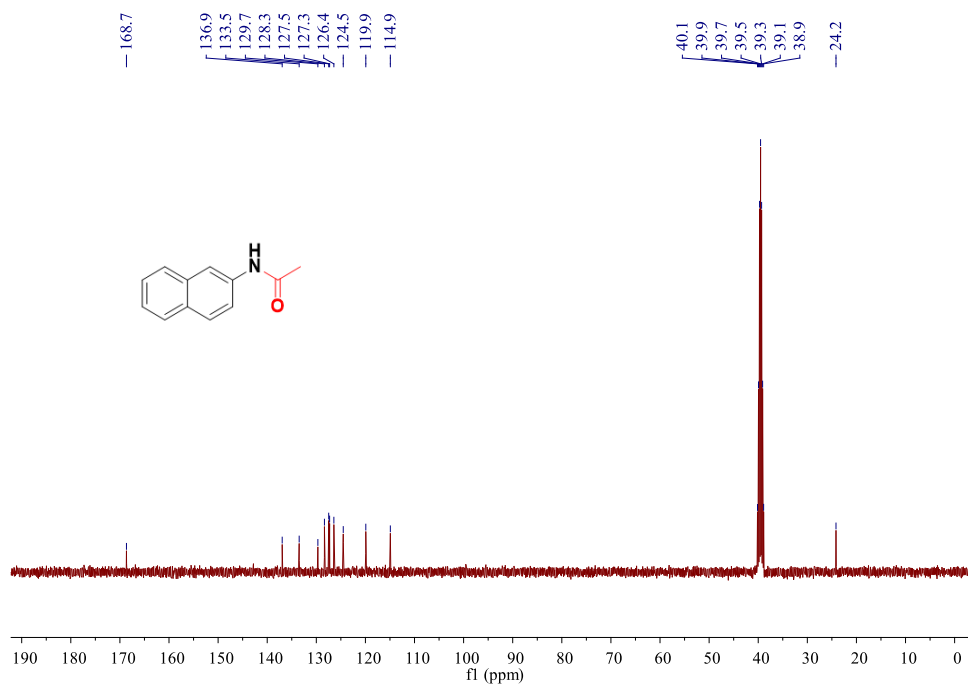

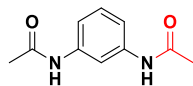

***N,N'*-(1,3-Phenylene) diacetamide (5ao)**

ethyl acetate, yellow solid, 66% yield (25.4 mg). mp: 180 – 182°C. <sup>1</sup>H NMR (400 MHz, DMSO) δ 9.92 (s, 2H), 7.87 (s, 1H), 7.26 – 7.24 (m, 2H), 7.16 (dd, *J* = 8.7, 7.2 Hz, 0H), 2.02 (s, 3H). <sup>13</sup>C NMR (100 MHz, DMSO) δ 168.4, 139.6, 128.8, 113.9, 109.8, 24.1. HRMS (ESI-TOF): Anal Calcd. For. C<sub>10</sub>H<sub>12</sub>N<sub>2</sub>O<sub>2</sub>+H<sup>+</sup>: 193.0972, Found: 193.0971. IR (neat, cm<sup>-1</sup>): ν 3404, 1665, 1550, 1485, 1419, 1373, 1049, 823, 761.

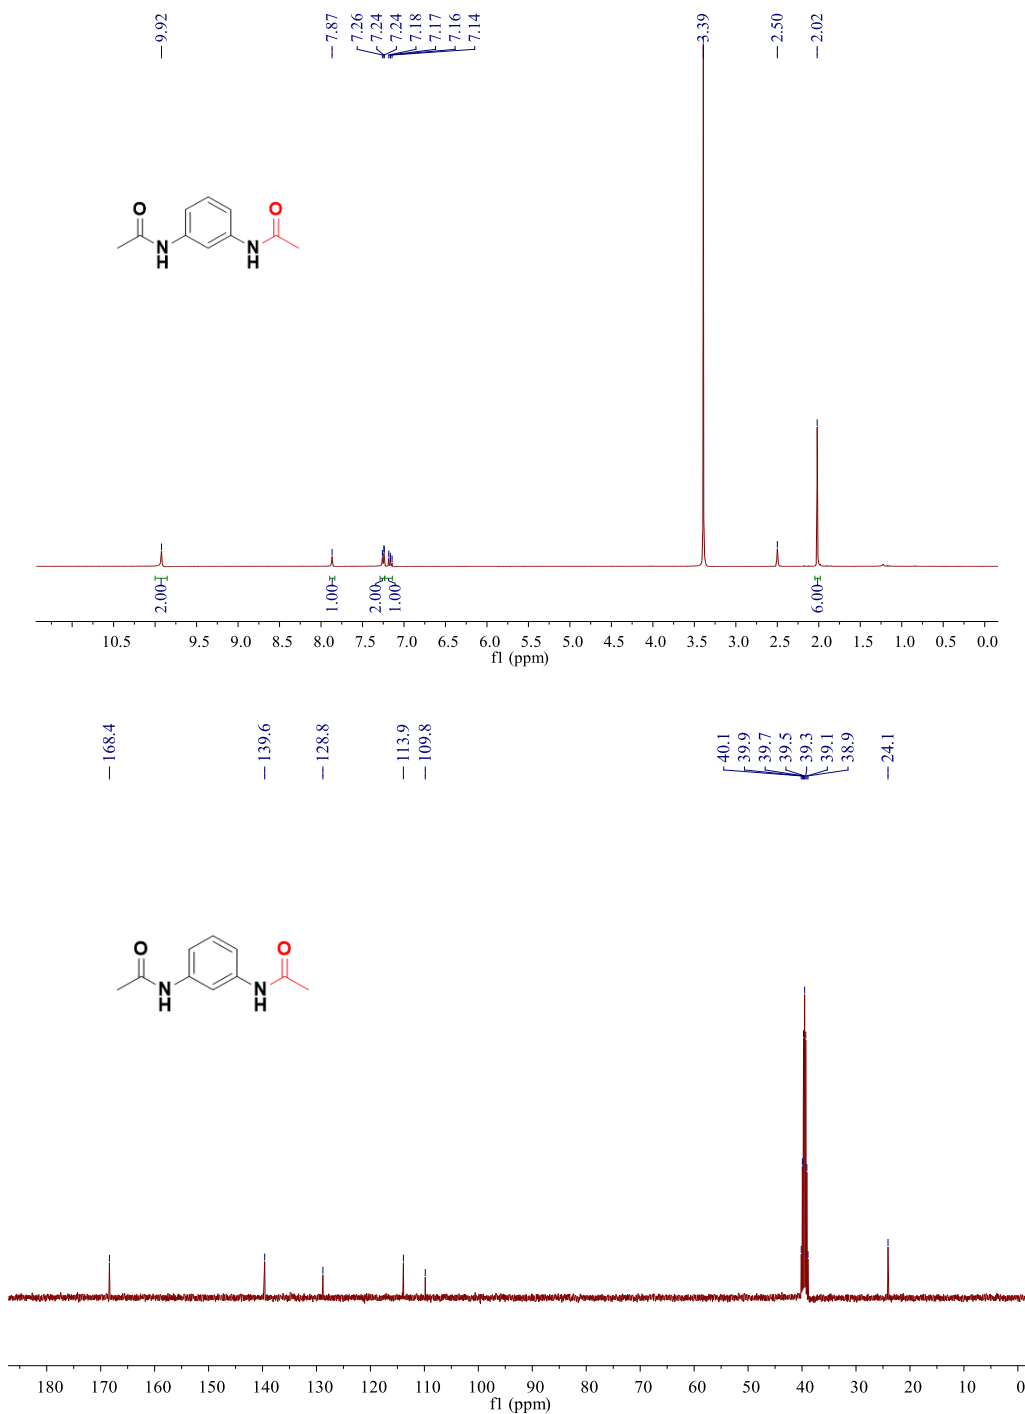

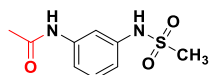

***N*-(3-(Methylsulfonamido)phenyl)acetamide (5ap)**

dichloromethane / ethyl acetate = 2:1, yellow oil, 74% yield (33.7 mg).  $^1\text{H NMR}$  (400 MHz, DMSO)  $\delta$  9.98 (s, 1H), 9.72 (s, 1H), 7.50 – 7.49 (m, 1H), 7.35 – 7.32 (m, 1H), 7.24 – 7.20 (m, 1H), 6.87 – 6.85 (m, 1H), 2.96 (s, 3H), 2.02 (s, 3H).  $^{13}\text{C NMR}$  (100 MHz, DMSO)  $\delta$  168.4, 140.1, 138.7, 129.4, 114.5, 114.3, 110.3, 54.9, 24.0. **HRMS** (ESI-TOF): Anal Calcd. For.  $\text{C}_9\text{H}_{12}\text{N}_2\text{O}_3\text{S}+\text{H}^+$ : 229.0641, Found: 229.0640. **IR** (neat,  $\text{cm}^{-1}$ ):  $\nu$  3398, 3274, 2240, 1674, 1608, 1542, 1471, 1301, 1200, 1053, 904, 820, 724, 648.

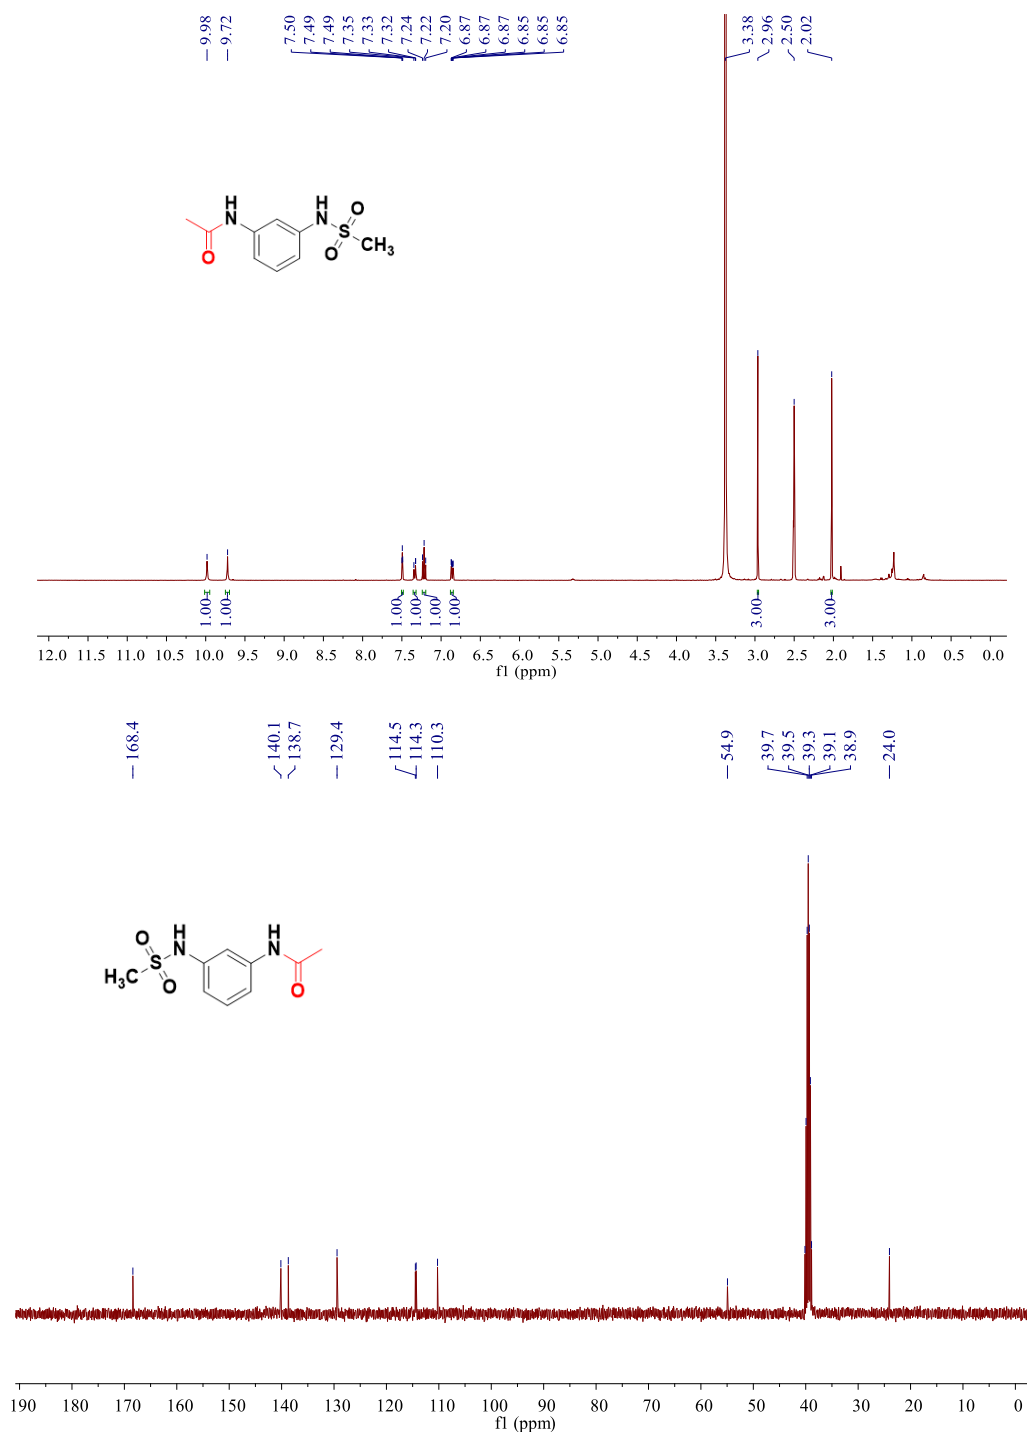

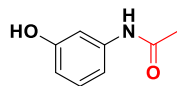

**N-(3-Hydroxyphenyl)acetamide (5aq)**

dichloromethane / ethyl acetate = 2:1, yellow solid, 53% yield (16.1 mg). mp: 150 – 153°C. <sup>1</sup>H NMR (400 MHz, DMSO) δ 9.79 (s, 1H), 9.34 (s, 1H), 7.20 (t, *J* = 2.0 Hz, 1H), 7.04 (t, *J* = 8.1 Hz, 1H), 6.92 (d, *J* = 8.1 Hz, 1H), 6.44 – 6.42 (m, 1H), 2.01 (s, 3H). <sup>13</sup>C NMR (100 MHz, DMSO) δ 168.3, 157.6, 140.4, 129.4, 110.2, 109.8, 106.3, 24.1. HRMS (ESI-TOF): Anal Calcd. For. C<sub>8</sub>H<sub>9</sub>NO<sub>2</sub>+H<sup>+</sup>: 152.0706, Found: 152.0706. IR (neat, cm<sup>-1</sup>): ν 3299, 3261, 2926, 1661, 1513, 1453, 1371, 908, 816, 729, 647.

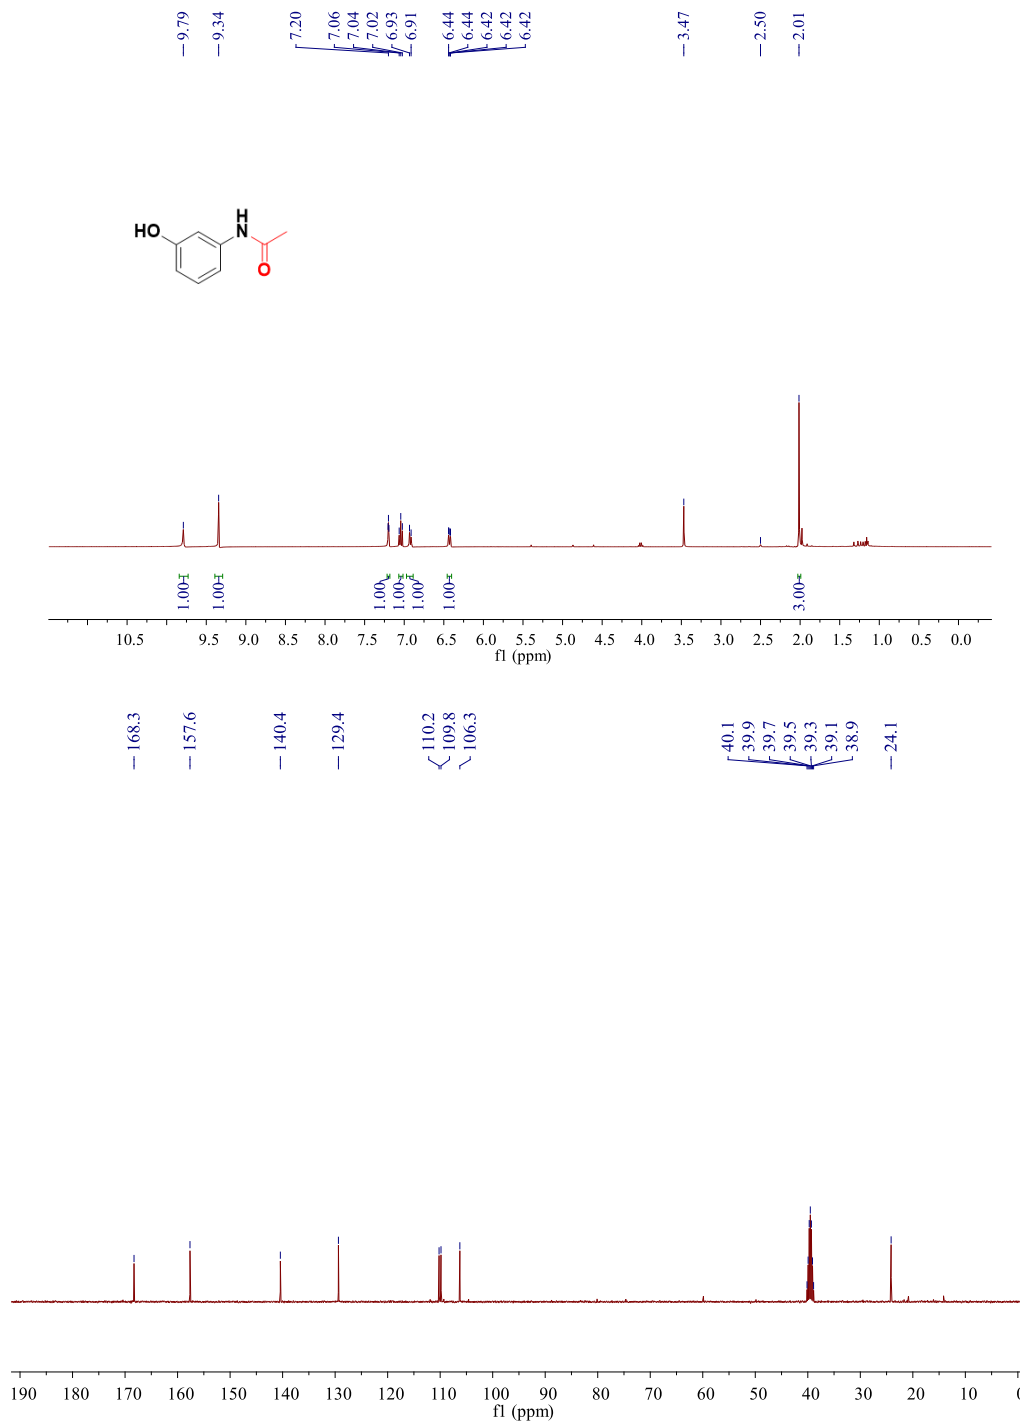



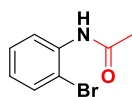

### *N*-(2-Bromophenyl)acetamide (5ar)

dichloromethane, yellow solid, 64% yield (27.3 mg). mp: 90 – 92°C.  $^1\text{H NMR}$  (400 MHz, DMSO)  $\delta$  9.46 (s, 1H), 7.67 – 7.58 (m, 2H), 7.27 – 7.33 (m, 1H), 7.13 – 7.09 (m, 1H), 2.07 (s, 3H).  $^{13}\text{C NMR}$  (100 MHz, DMSO)  $\delta$  168.5, 136.4, 132.6, 127.9, 127.3, 126.9, 117.9, 23.3. **HRMS** (ESI-TOF): Anal Calcd. For.  $\text{C}_8\text{H}_8^{79}\text{BrNO}+\text{H}^+$ : 213.9862, Found: 213.9861;  $\text{C}_8\text{H}_8^{81}\text{BrNO}+\text{H}^+$ : 215.9842, Found: 215.9841. **IR** (neat,  $\text{cm}^{-1}$ ):  $\nu$  3410, 1660, 1510, 1430, 1207, 1005, 785, 690.

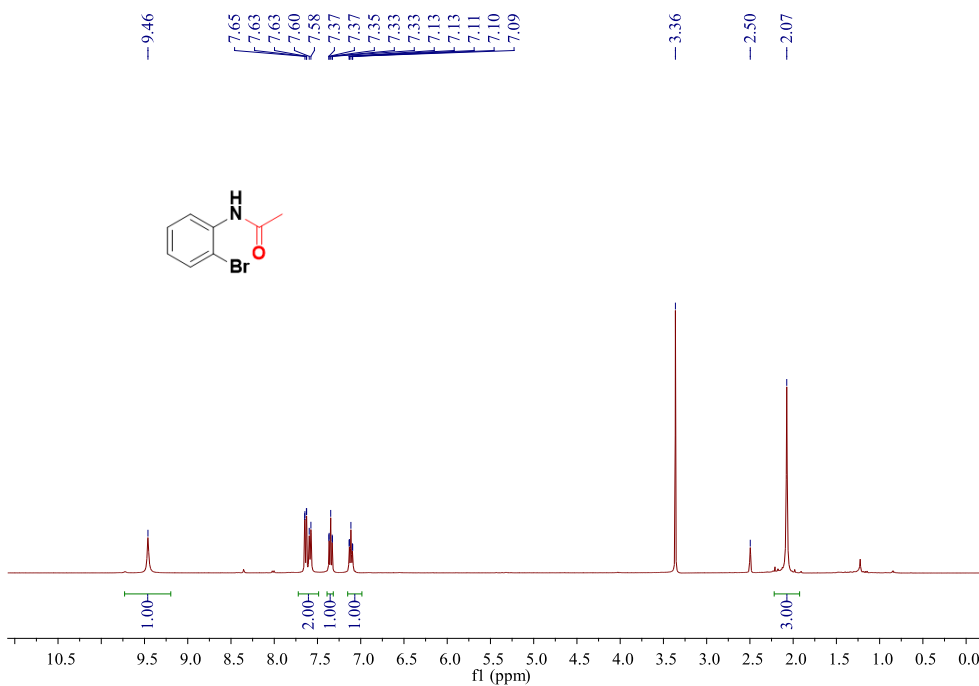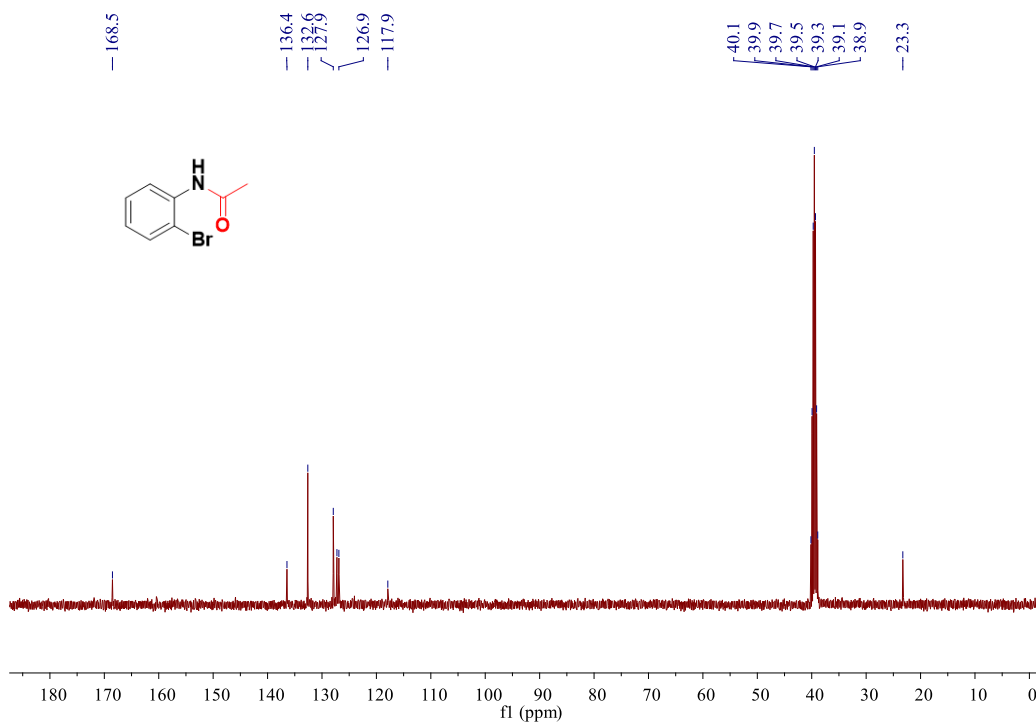

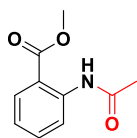

### Methyl 2-acetamidobenzoate (5as)

petroleum ether / ethyl acetate = 10:1, yellow solid, 60% yield (23.0 mg). mp: 98 – 100°C.  $^1\text{H NMR}$  (400 MHz, DMSO)  $\delta$  10.54 (s, 1H), 8.22 – 8.20 (m, 1H), 7.90 – 7.88 (m, 1H), 7.61 – 7.56 (m, 1H), 7.20 – 7.15 (m, 1H), 3.85 (s, 3H), 2.11 (s, 3H).  $^{13}\text{C NMR}$  (100 MHz, DMSO)  $\delta$  168.5, 167.5, 139.6, 133.9, 130.4, 123.1, 121.2, 117.8, 52.4, 24.6. **HRMS** (ESI-TOF): Anal Calcd. For.  $\text{C}_{10}\text{H}_{11}\text{NO}_3 + \text{H}^+$ : 194.0812, Found: 194.0812. **IR** (neat,  $\text{cm}^{-1}$ ):  $\nu$  3385, 2955, 1684, 1588, 1524, 1368, 1296, 993, 824, 760.

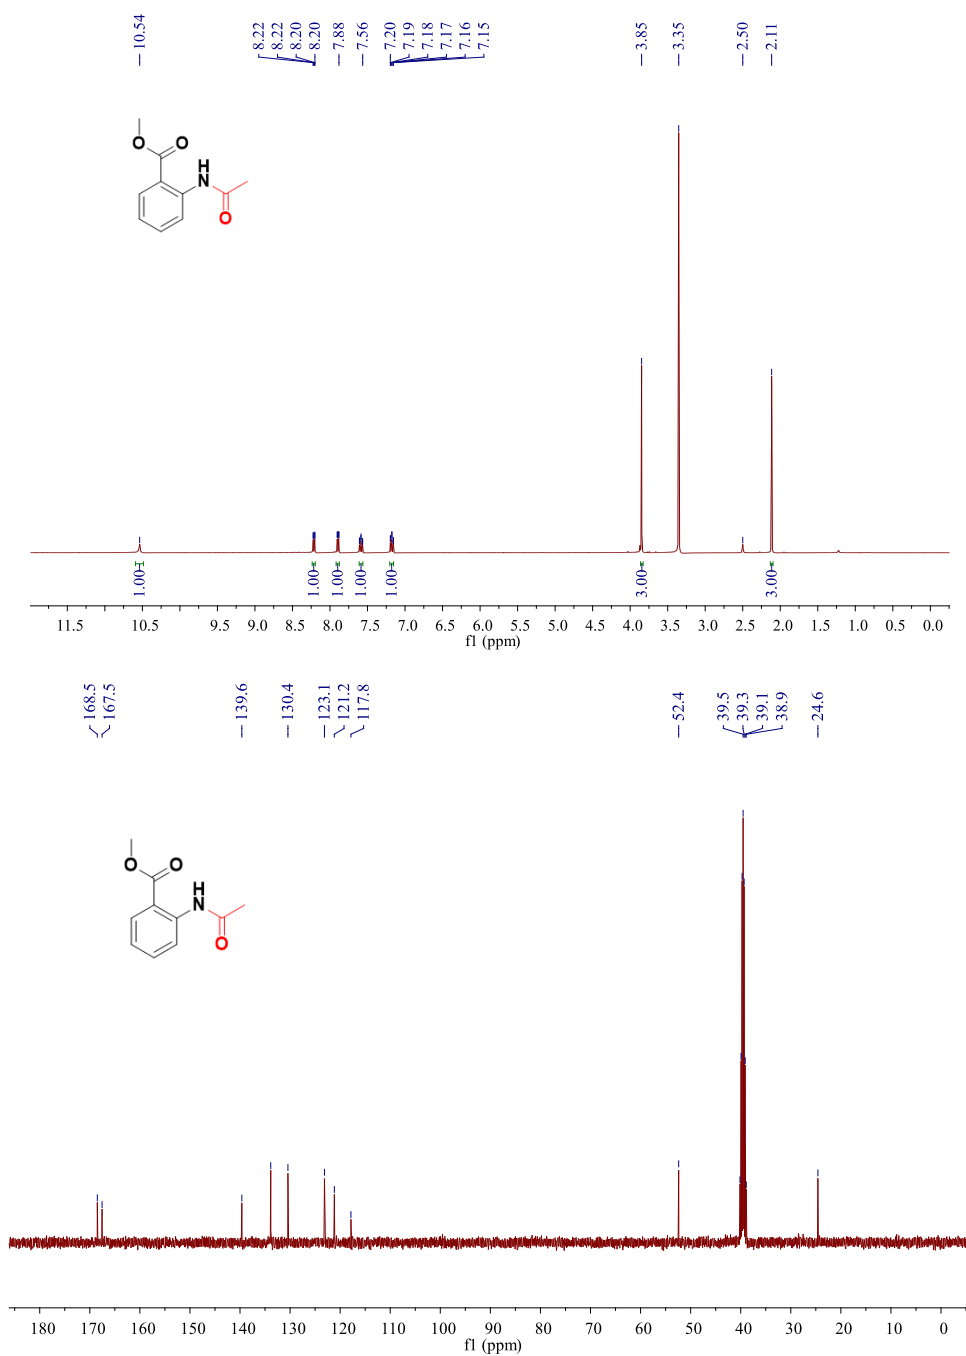

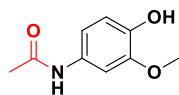

***N*-(4-Hydroxy-3-methoxyphenyl)acetamide (5at)**

petroleum ether / ethyl acetate = 1:1, yellow solid, 48% yield (17.2 mg). mp: 110 – 112°C. <sup>1</sup>H NMR (400 MHz, CDCl<sub>3</sub>) δ 7.51 (s, 1H), 7.39 (d, *J* = 2.2 Hz, 1H), 6.82 (d, *J* = 8.5 Hz, 1H), 6.69 (dd, *J* = 8.5, 2.2 Hz, 1H), 5.68 (s, 1H), 3.85 (s, 3H), 2.14 (s, 3H). <sup>13</sup>C NMR (100 MHz, CDCl<sub>3</sub>) δ 168.5, 146.4, 142.5, 130.6, 114.1, 112.9, 104.8, 55.9, 24.3. HRMS (ESI-TOF): Anal Calcd. For. C<sub>9</sub>H<sub>11</sub>NO<sub>3</sub>+H<sup>+</sup>: 182.0812, Found: 182.0810. IR (neat, cm<sup>-1</sup>): ν 3298, 3261, 2926, 1661, 1513, 1453, 1371, 1200, 907, 816, 729, 647.

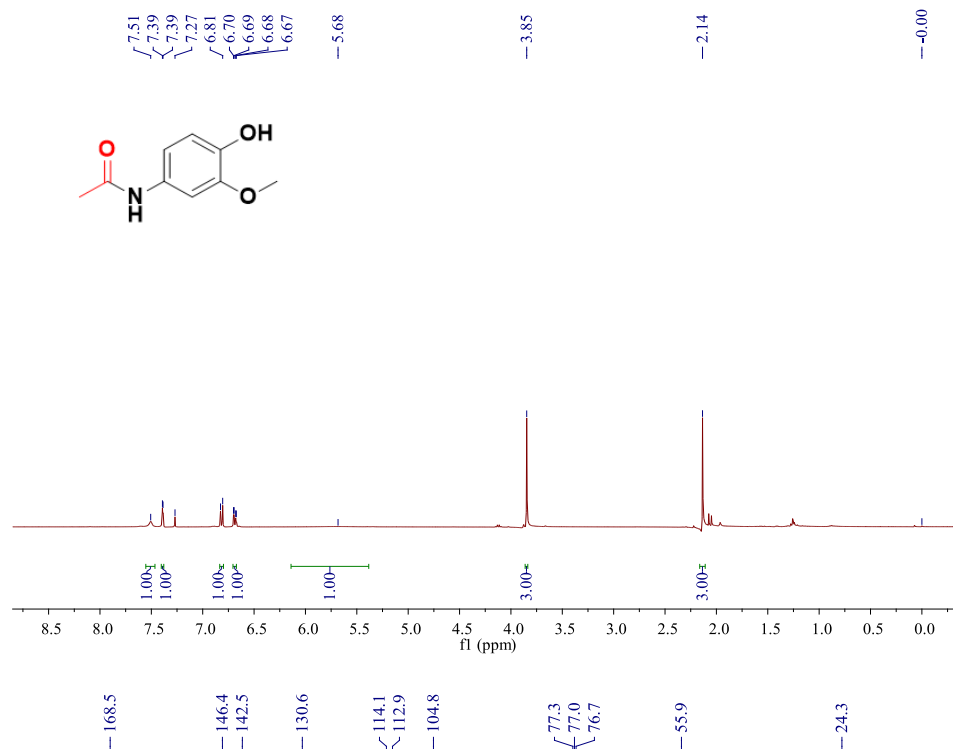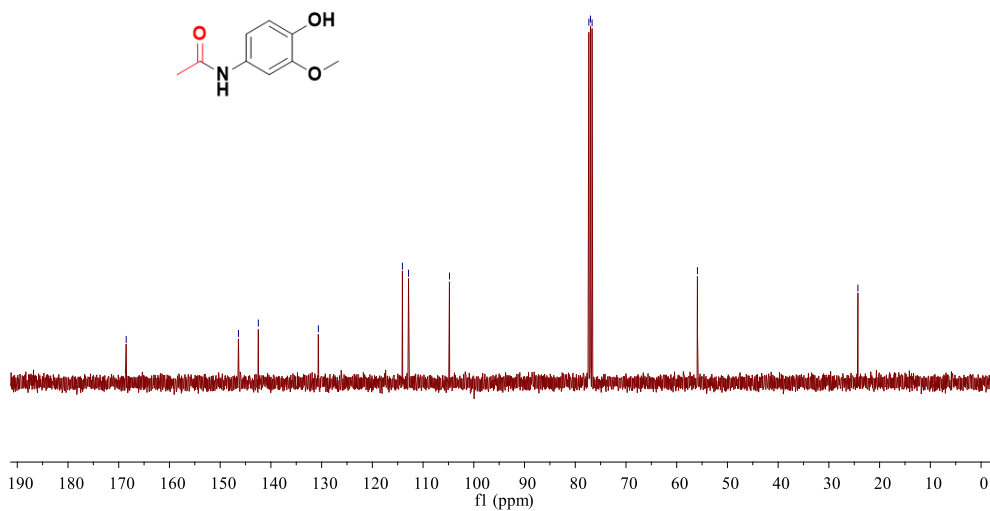

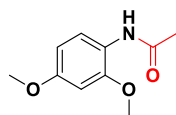

**N-(2,4-Dimethoxyphenyl)acetamide (5au)**

dichloromethane / ethyl acetate = 5:1, yellow solid, 80% yield (31.2 mg). mp: 113 – 115°C. **<sup>1</sup>H NMR** (400 MHz, DMSO) δ 8.98 (s, 1H), 7.64 (d, *J* = 8.7 Hz, 1H), 6.59 (d, *J* = 2.6 Hz, 1H), 6.46 (dd, *J* = 8.7, 2.6 Hz, 1H), 3.79 (s, 3H), 3.73 (s, 3H), 2.02 (s, 3H). **<sup>13</sup>C NMR** (100 MHz, DMSO) δ 168.2, 156.7, 151.5, 123.9, 120.5, 104.0, 98.7, 55.6, 55.3, 23.5. **HRMS** (ESI-TOF): Anal Calcd. For. C<sub>10</sub>H<sub>13</sub>NO<sub>3</sub>+H<sup>+</sup>: 196.0968, Found: 196.0968. **IR** (neat, cm<sup>-1</sup>): ν 3421, 1731, 1670, 1528, 1455, 137, 1247, 1049, 822, 760.

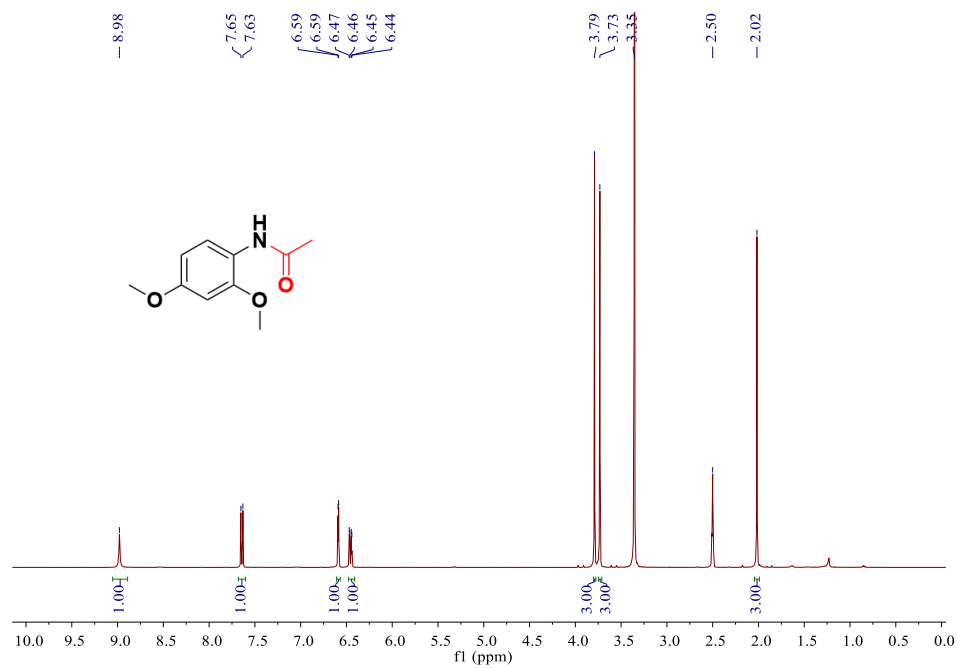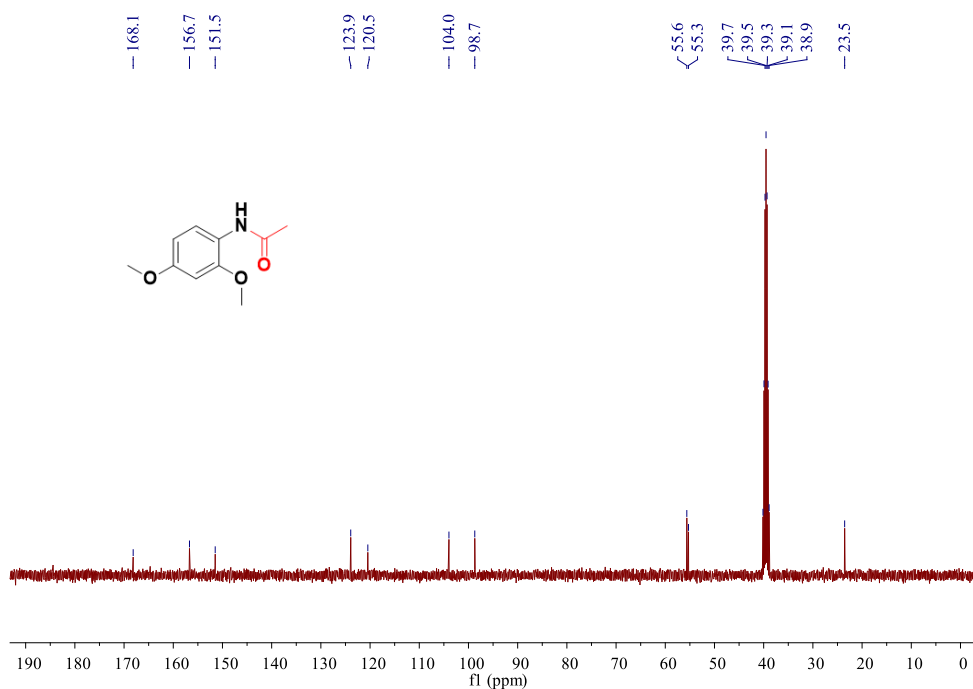

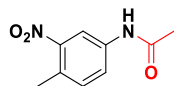

**N-(4-Methyl-3-nitrophenyl)acetamide (5av)**

dichloromethane / ethyl acetate = 5:1, yellow solid, 78% yield (30.3 mg). mp: 141 – 143°C. <sup>1</sup>H NMR (400 MHz, DMSO) δ 10.28 (s, 1H), 8.34 (d, *J* = 2.2 Hz, 1H), 7.66 (dd, *J* = 8.4, 2.2 Hz, 1H), 7.36 (d, *J* = 8.4 Hz, 1H), 2.42 (s, 3H), 2.06 (s, 3H). <sup>13</sup>C NMR (100 MHz, DMSO) δ 168.9, 148.5, 138.2, 133.0, 126.9, 123.5, 114.1, 24.0, 19.2. HRMS (ESI-TOF): Anal Calcd. For. C<sub>9</sub>H<sub>10</sub>N<sub>2</sub>O<sub>3</sub>+H<sup>+</sup>: 195.0764, Found: 195.0764. IR (neat, cm<sup>-1</sup>): ν 3353, 1672, 1537, 1489, 1392, 1198, 990, 894, 758, 684.

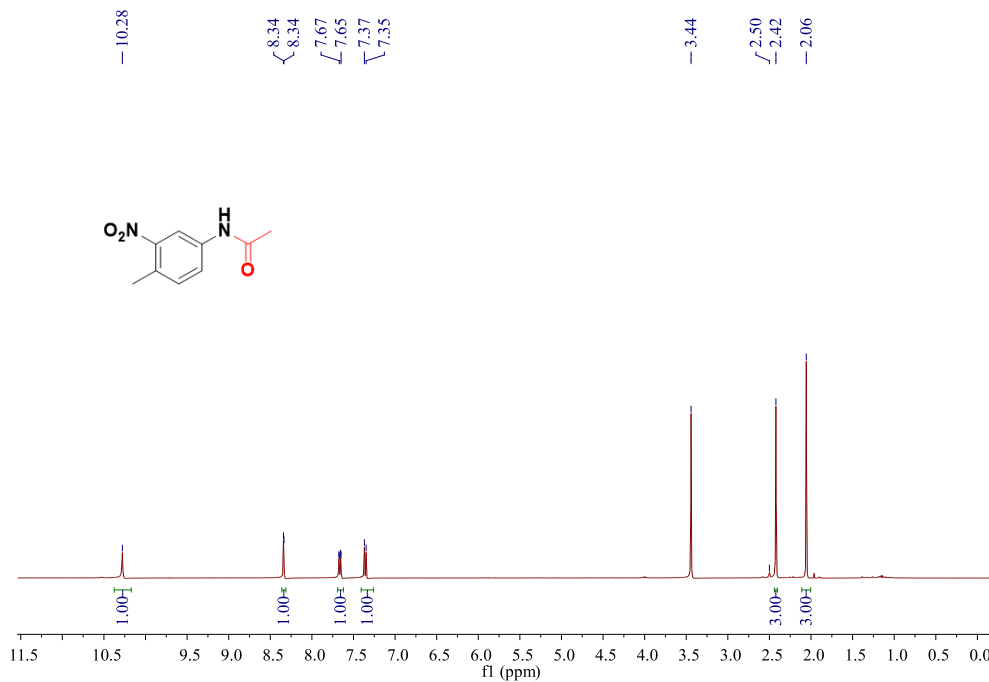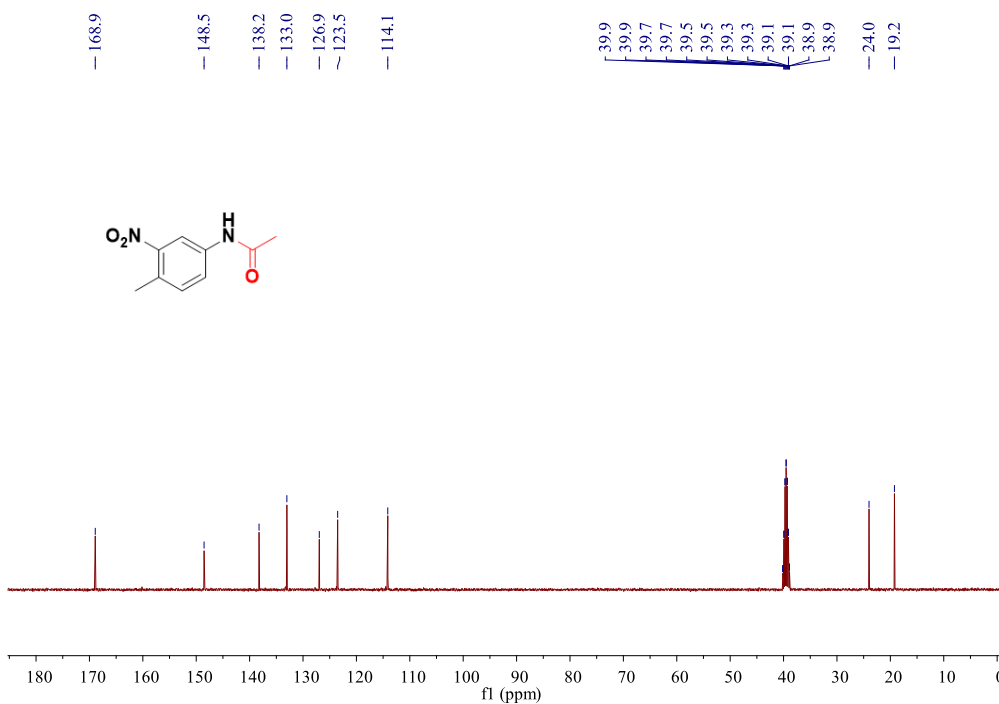

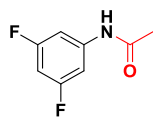

**N-(3,5-Difluorophenyl)acetamide (5aw)**

dichloromethane / ethyl acetate = 7:1, yellow solid, 97% yield (33.2 mg). mp: 125 – 127°C. <sup>1</sup>H NMR (400 MHz, DMSO) δ 10.29 (s, 1H), 7.31 – 7.26 (m, 2H), 6.87 – 6.81 (m, 1H), 2.06 (s, 3H). <sup>13</sup>C NMR (100 MHz, DMSO) δ 169.0, 162.4 (dd, *J* = 242.8, 15.3 Hz), 141.7 (t, *J* = 14.0 Hz), 101.7 (d, *J* = 29.2 Hz), 98.0 (t, *J* = 26.2 Hz), 24.1. <sup>19</sup>F NMR (377 MHz, DMSO) δ -109.5 (s, 2F). HRMS (ESI-TOF): Anal Calcd. For. C<sub>8</sub>H<sub>7</sub>F<sub>2</sub>NO+H<sup>+</sup>: 172.0568, Found: 172.0568. IR (neat, cm<sup>-1</sup>): ν 3450, 1700, 1653, 1500, 1051, 655.

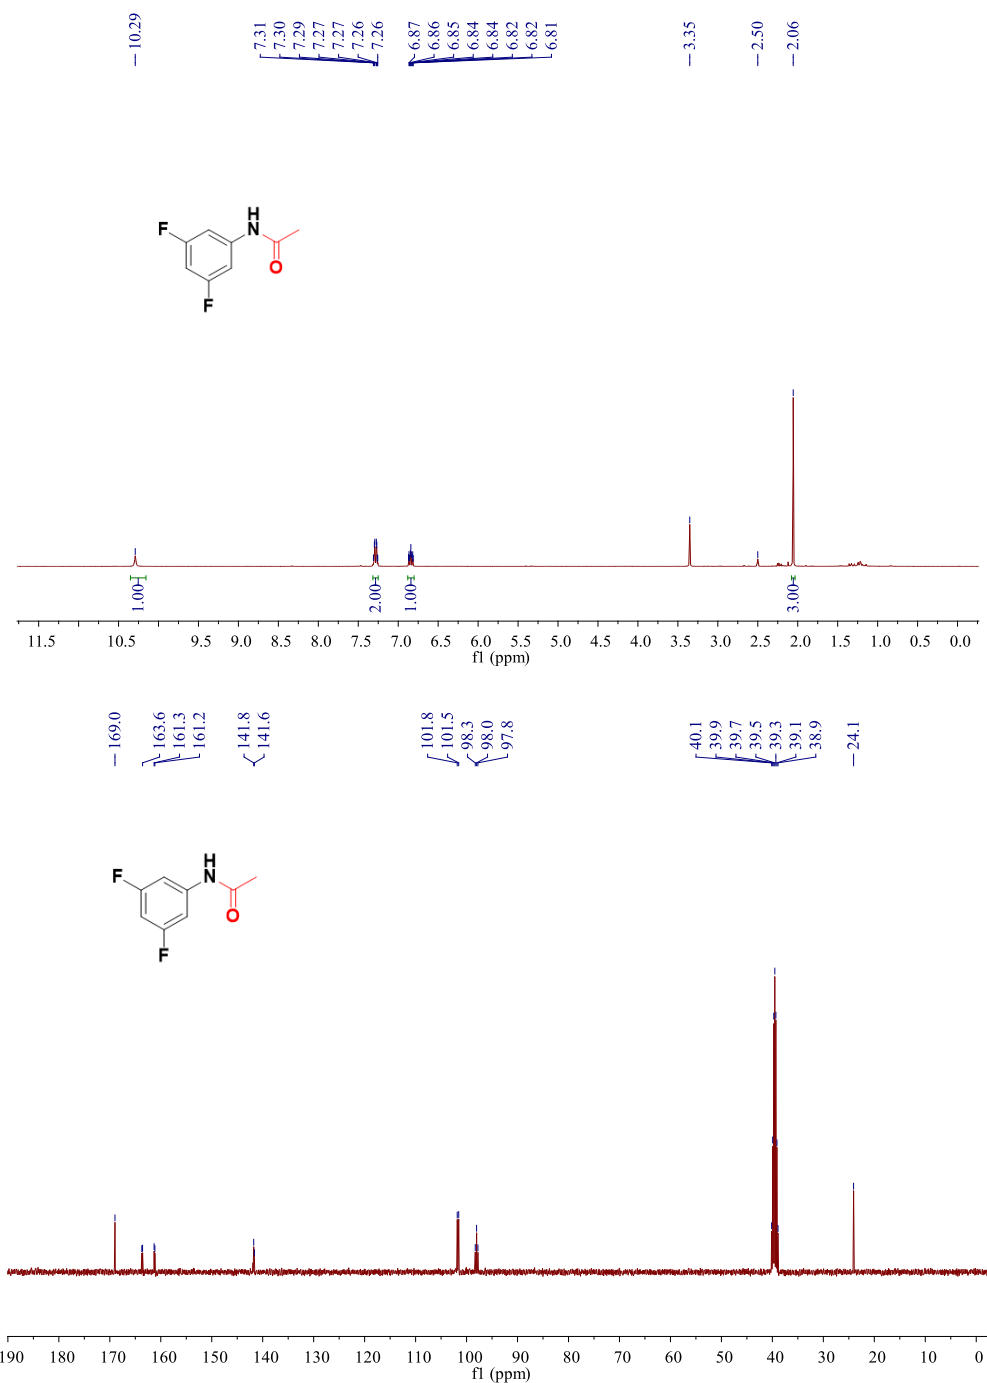

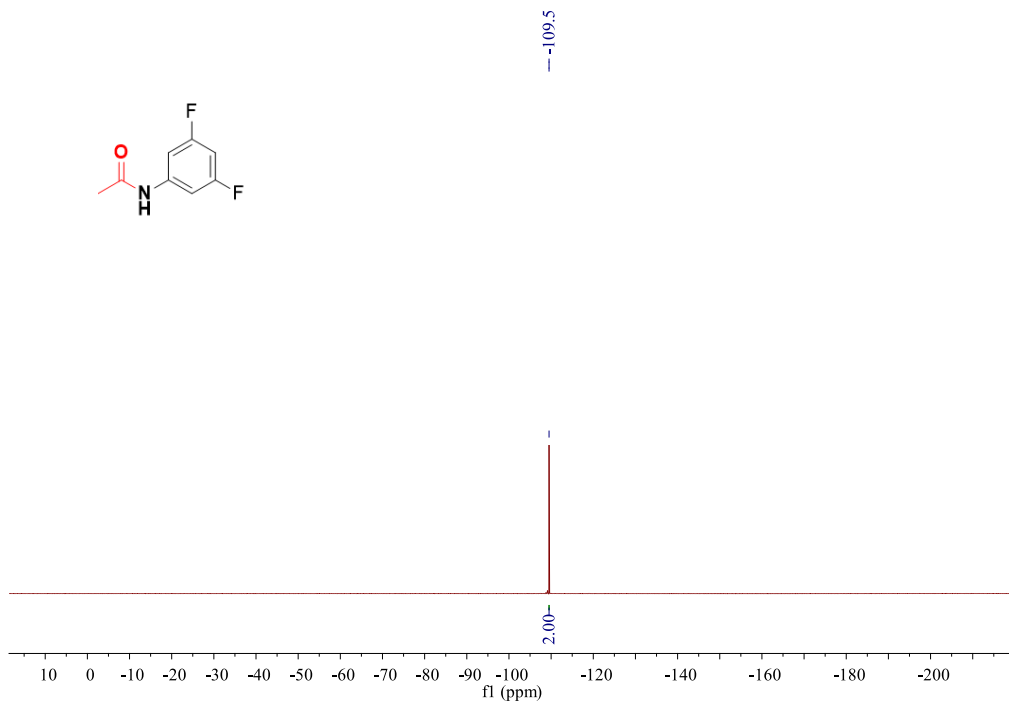

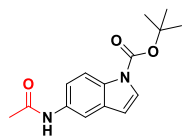

**Tert-butyl 5-acetamido-1H-indole-1-carboxylate (5ax)**

petroleum ether / ethyl acetate = 5:1, yellow oil, 57% yield (31.3 mg).  $^1\text{H NMR}$  (400 MHz,  $\text{CDCl}_3$ )  $\delta$  8.44 (s, 1H), 7.66 (s, 1H), 7.54 (d,  $J = 3.5$  Hz, 1H), 7.44 (d,  $J = 8.4$  Hz, 1H), 7.30 (s, 1H), 6.50 (d,  $J = 3.5$  Hz, 1H), 2.18 (s, 3H), 1.67 (s, 9H).  $^{13}\text{C NMR}$  (100 MHz,  $\text{CDCl}_3$ )  $\delta$  168.5, 149.7, 135.2, 134.7, 127.2, 125.9, 120.9, 115.8, 107.3, 107.0, 83.9, 28.1, 24.5. **HRMS** (ESI-TOF): Anal Calcd. For.  $\text{C}_{15}\text{H}_{18}\text{N}_2\text{O}_3 + \text{H}^+$ : 275.1390, Found: 275.1388. **IR** (neat,  $\text{cm}^{-1}$ ):  $\nu$  3300, 2933, 1731, 1662, 1524, 1433, 1214, 1024, 906, 726, 647.

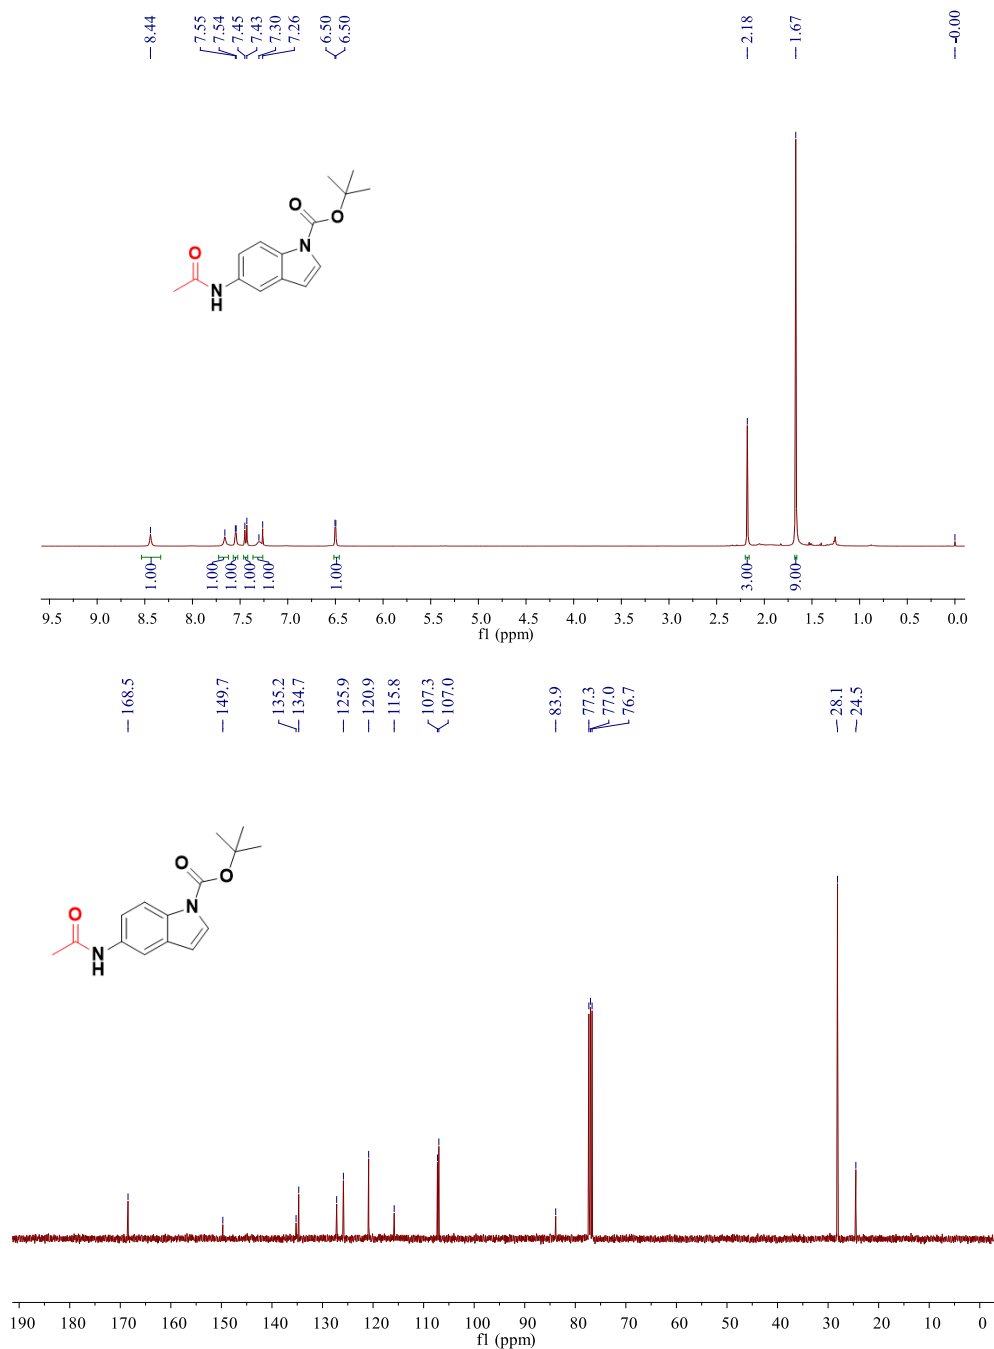



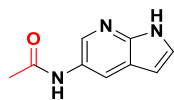

**N-(1H-pyrrolo[2,3-b]pyridin-5-yl)acetamide (5ay)**

petroleum ether / ethyl acetate = 1:1, yellow oil, 55% yield (19.2 mg). **<sup>1</sup>H NMR** (400 MHz, DMSO)  $\delta$  11.51 (s, 1H), 9.93 (s, 1H), 8.25 (d,  $J = 2.3$  Hz, 1H), 8.22 (d,  $J = 2.3$  Hz, 1H), 7.43 – 7.31 (m, 1H), 6.40 (dd,  $J = 3.4, 1.9$  Hz, 1H), 2.06 (s, 3H). **<sup>13</sup>C NMR** (100 MHz, DMSO)  $\delta$  168.3, 145.3, 136.0, 126.8, 119.1, 119.1, 99.8, 23.7. **HRMS** (ESI-TOF): Anal Calcd. For. C<sub>9</sub>H<sub>9</sub>N<sub>3</sub>O+H<sup>+</sup>: 176.0818, Found: 176.0817. **IR** (neat, cm<sup>-1</sup>):  $\nu$  3415, 2922, 1620, 1548, 1210, 1005, 745.

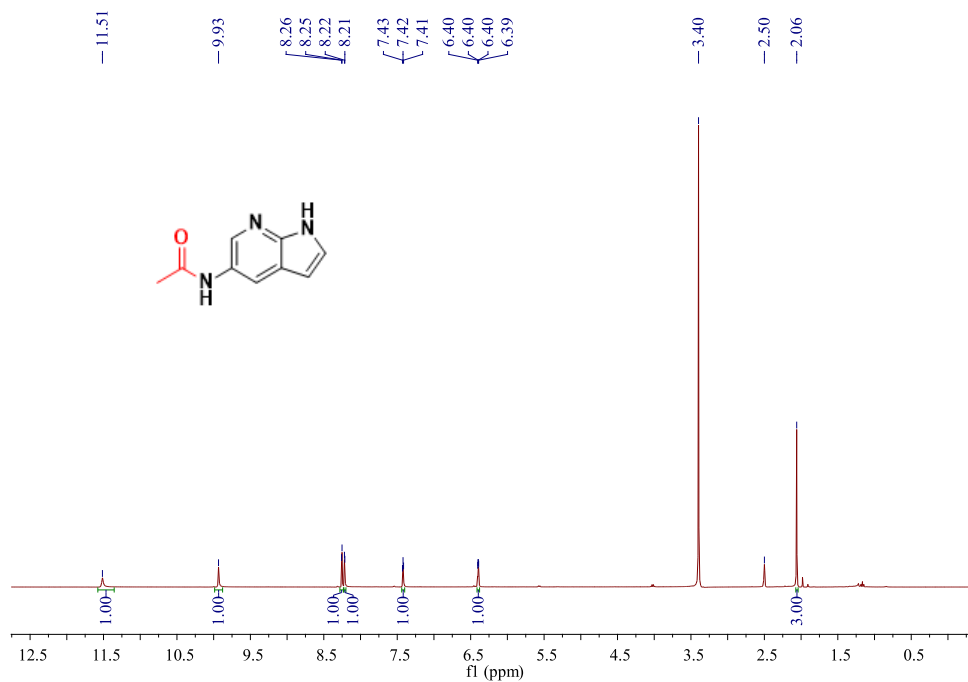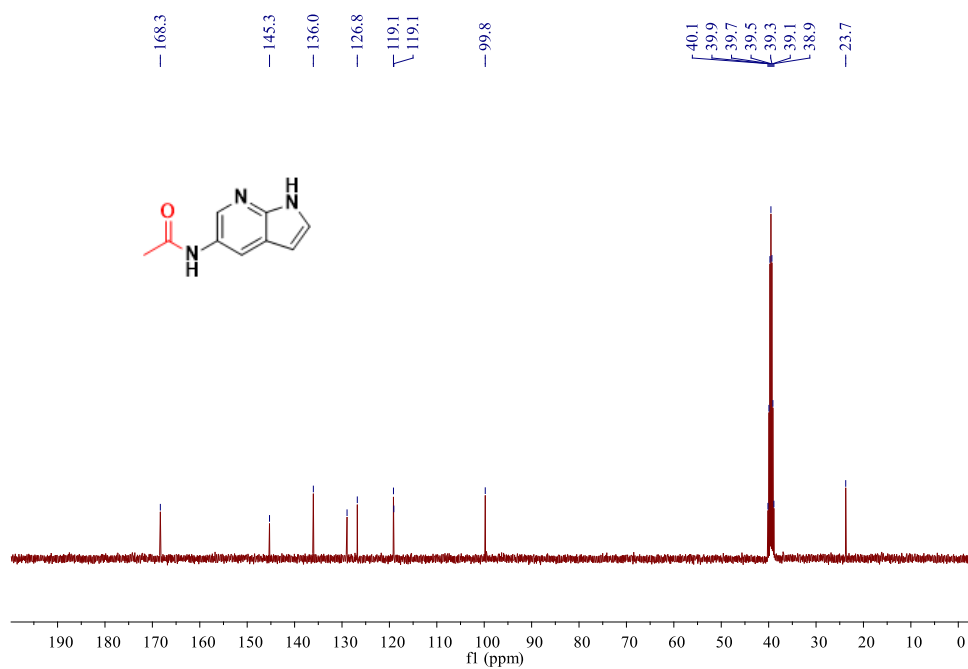

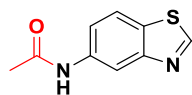

**N-(Benzo[d]thiazol-5-yl)acetamide (5az)**

petroleum ether / ethyl acetate = 1:1, yellow solid, 63% yield (24.0 mg). mp: 185 – 187°C. <sup>1</sup>H NMR (400 MHz, DMSO) δ 10.17 (s, 1H), 9.35 (s, 1H), 8.47 (d, *J* = 1.9 Hz, 1H), 8.03 (d, *J* = 8.7 Hz, 1H), 7.58 (dd, *J* = 8.7, 1.9 Hz, 1H), 2.09 (s, 3H). <sup>13</sup>C NMR (100 MHz, DMSO) δ 168.6, 156.8, 153.6, 138.0, 127.7, 122.3, 117.9, 112.6, 24.1. HRMS (ESI-TOF): Anal Calcd. For. C<sub>9</sub>H<sub>8</sub>N<sub>2</sub>OS+H<sup>+</sup>: 193.0430, Found: 193.0430. IR (neat, cm<sup>-1</sup>): ν 3414, 1731, 1665, 1526, 1444, 1374, 1247, 1023, 823, 760.

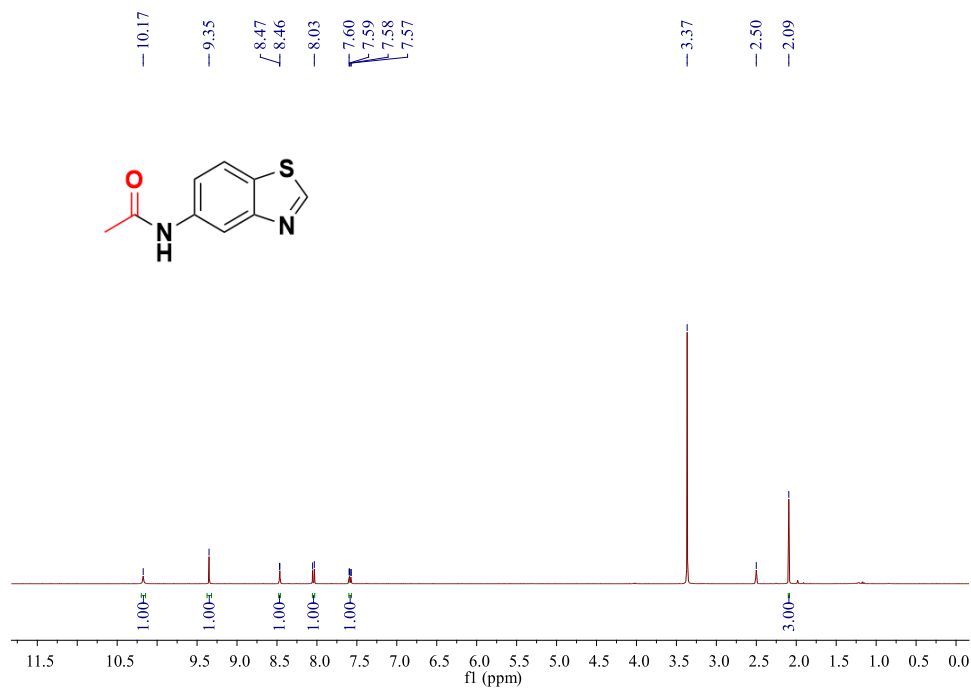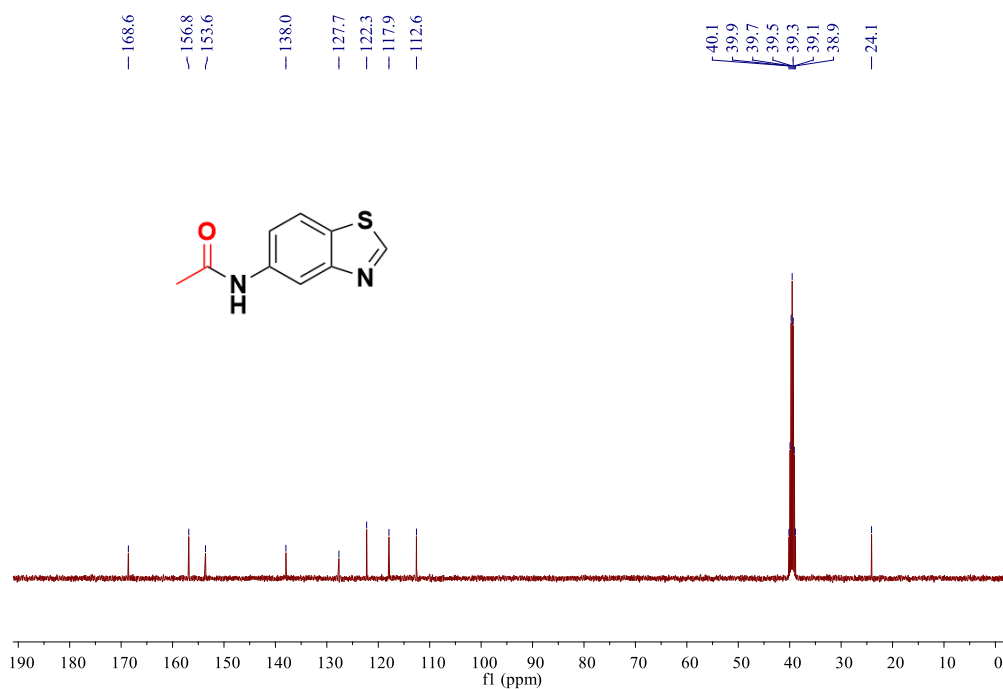

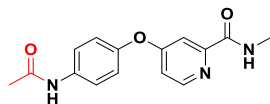

#### 4-(4-Acetamidobenzyl)-*N*-methylpicolinamide (5ba)

ethyl acetate, yellow oil, 64% yield (36.5 mg).  $^1\text{H NMR}$  (400 MHz, DMSO)  $\delta$  10.10 (s, 1H), 8.79 – 8.76 (m, 1H), 8.50-8.49 (m, 1H), 7.70 – 7.69 (m, 2H), 7.36 (d,  $J = 0.6$  Hz, 1H), 7.17 – 7.15 (m, 2H), 7.14 – 7.12 (m, 1H), 2.78 (d,  $J = 4.9$  Hz, 3H), 2.06 (s, 3H).  $^{13}\text{C NMR}$  (100 MHz,  $\text{CDCl}_3$ )  $\delta$  169.3, 166.5, 164.8, 151.9, 149.8, 149.3, 136.4, 121.8, 121.1, 114.1, 109.8, 26.2, 24.2. **HRMS** (ESI-TOF): Anal Calcd. For.  $\text{C}_{15}\text{H}_{15}\text{N}_3\text{O}_3+\text{H}^+$ : 286.1186, Found: 286.1184. **IR** (neat,  $\text{cm}^{-1}$ ):  $\nu$  3354, 2921, 1672, 1538, 1454, 1369, 1254, 1065, 894, 758, 685.

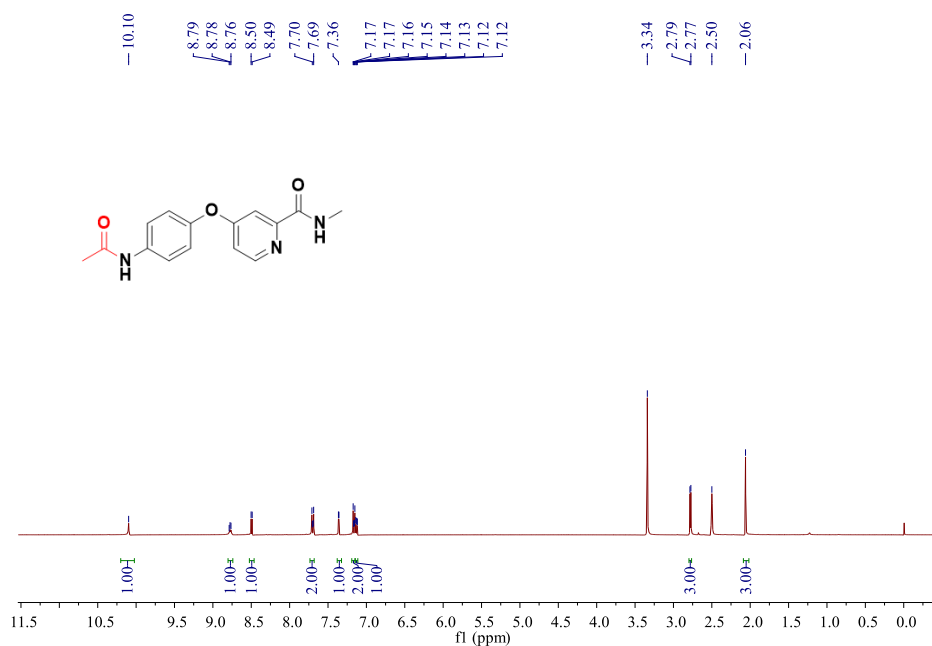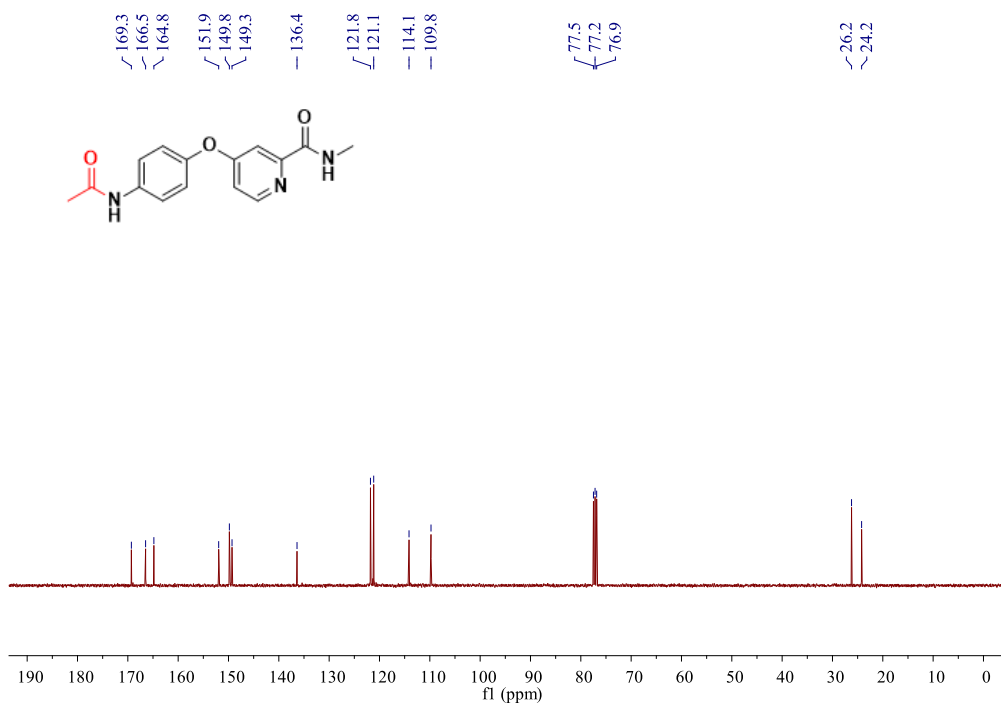

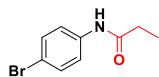

***N*-(4-Bromophenyl)-*N*-methylpropionamide (5bb)**

petroleum ether / ethyl acetate = 5:1, yellow liquid, 65% yield (31.5 mg).  $^1\text{H NMR}$  (400 MHz, DMSO)  $\delta$  9.97 (s, 1H), 7.57 – 7.55 (m, 2H), 7.47 – 7.44 (m, 2H), 2.31 (q,  $J = 7.5$  Hz, 2H), 1.07 (t,  $J = 7.5$  Hz, 3H).  $^{13}\text{C NMR}$  (100 MHz, DMSO)  $\delta$  172.2, 138.7, 131.5, 120.9, 114.4, 29.5, 9.5. **HRMS** (ESI-TOF): Anal Calcd. For.  $\text{C}_9\text{H}_{10}^{79}\text{BrNO}+\text{H}^+$ : 228.0019, Found: 228.0014;  $\text{C}_9\text{H}_{10}^{81}\text{BrNO}+\text{Na}^+$ : 229.9998, Found: 229.9994. **IR** (neat,  $\text{cm}^{-1}$ ):  $\nu$  3298, 2977, 1661, 1603, 1590, 1487, 921, 726, 682.

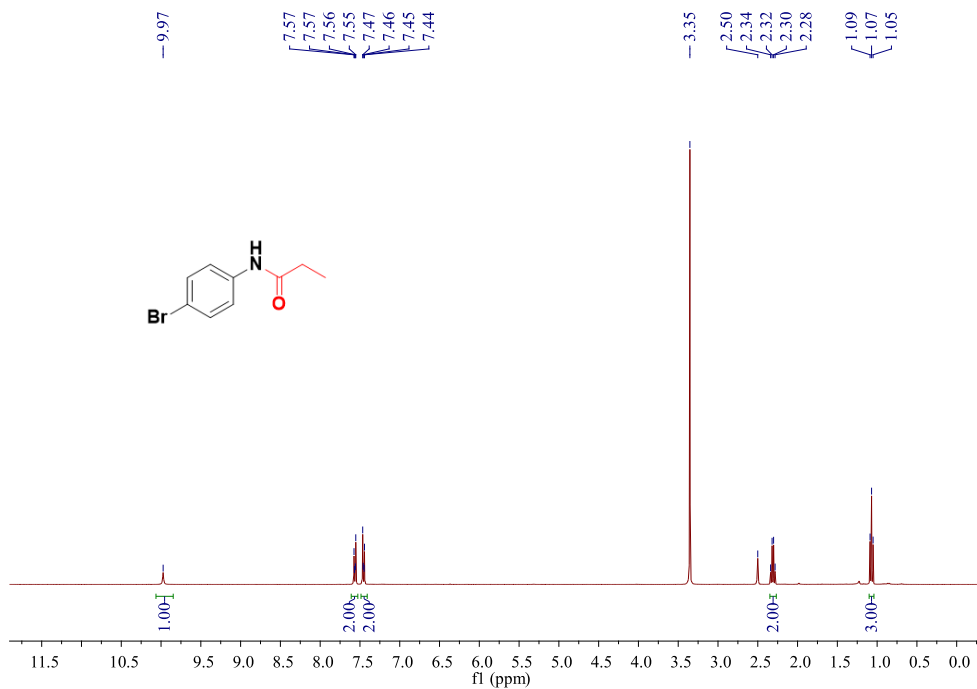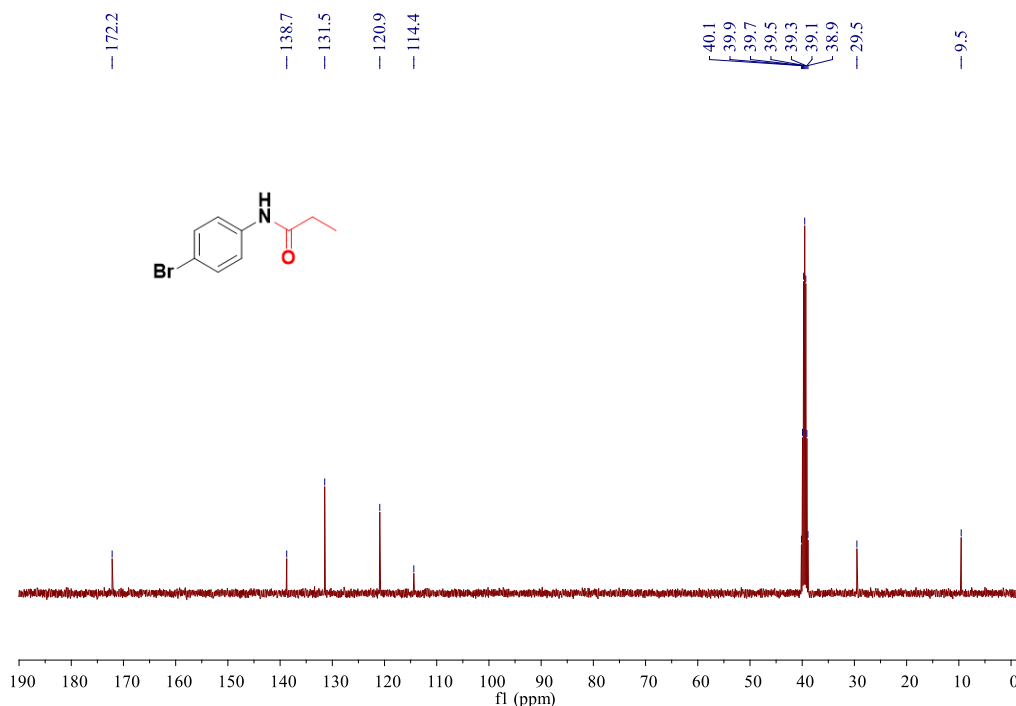

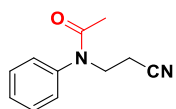

***N*-(2-Cyanoethyl)-*N*-phenylacetamide (5bc)**

petroleum ether / ethyl acetate =2:1, light yellow oil, 45% yield (16.9 mg). <sup>1</sup>H NMR (400 MHz, CDCl<sub>3</sub>) δ 7.47 (t, *J* = 7.5 Hz, 2H), 7.40 (t, *J* = 7.5 Hz, 1H), 7.27 – 7.24 (m, 2H), 3.96 (t, *J* = 6.8 Hz, 2H), 2.70 (t, *J* = 6.8 Hz, 2H), 1.88 (s, 3H). <sup>13</sup>C NMR (100 MHz, CDCl<sub>3</sub>) δ 170.9, 142.1, 130.0, 128.5, 127.8, 117.8, 45.2, 22.5, 16.4. HRMS (ESI-TOF): Anal Calcd. For. C<sub>11</sub>H<sub>12</sub>N<sub>2</sub>O+H<sup>+</sup>: 189.1022, Found: 189.1020. IR (neat, cm<sup>-1</sup>): ν 2934, 2251, 1655, 1596, 1494, 1395, 1202, 1025, 908, 726, 646.

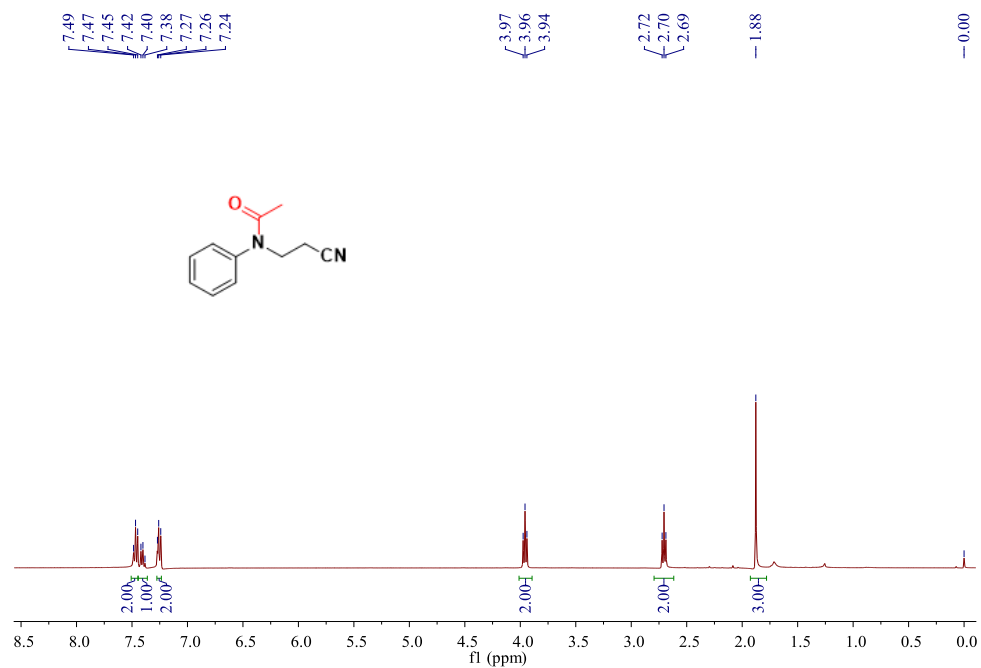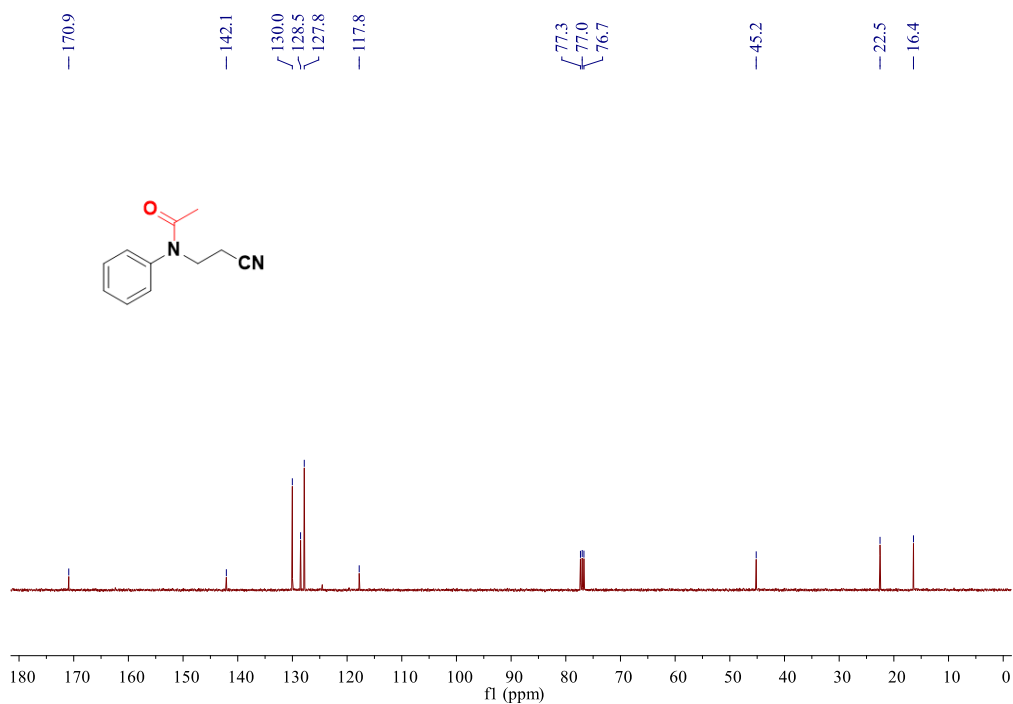

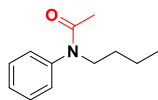

***N*-Butyl-*N*-phenylacetamide (5bd)**

dichloromethane / ethyl acetate = 1:1, yellow oil, 70% yield (26.7 mg).  $^1\text{H NMR}$  (400 MHz,  $\text{CDCl}_3$ )  $\delta$  7.44 – 7.40 (m, 2H), 7.36 – 7.33 (m, 1H), 7.17 – 7.15 (m, 1H), 3.71 – 3.67 (m, 2H), 1.82 (s, 3H), 1.52 – 1.44 (m, 2H), 1.29 – 1.26 (m, 2H), 0.88 (t,  $J = 7.3$  Hz, 2H).  $^{13}\text{C NMR}$  (100 MHz, DMSO)  $\delta$  168.6, 142.8, 129.5, 128.0, 127.5, 47.6, 29.4, 22.5, 19.4, 13.6. **HRMS** (ESI-TOF): Anal Calcd. For.  $\text{C}_{12}\text{H}_{17}\text{NO}+\text{H}^+$ : 192.1383, Found: 192.1380. **IR** (neat,  $\text{cm}^{-1}$ ):  $\nu$  2956, 1649, 1516, 1455, 1383, 1261, 1083, 908, 826, 732.

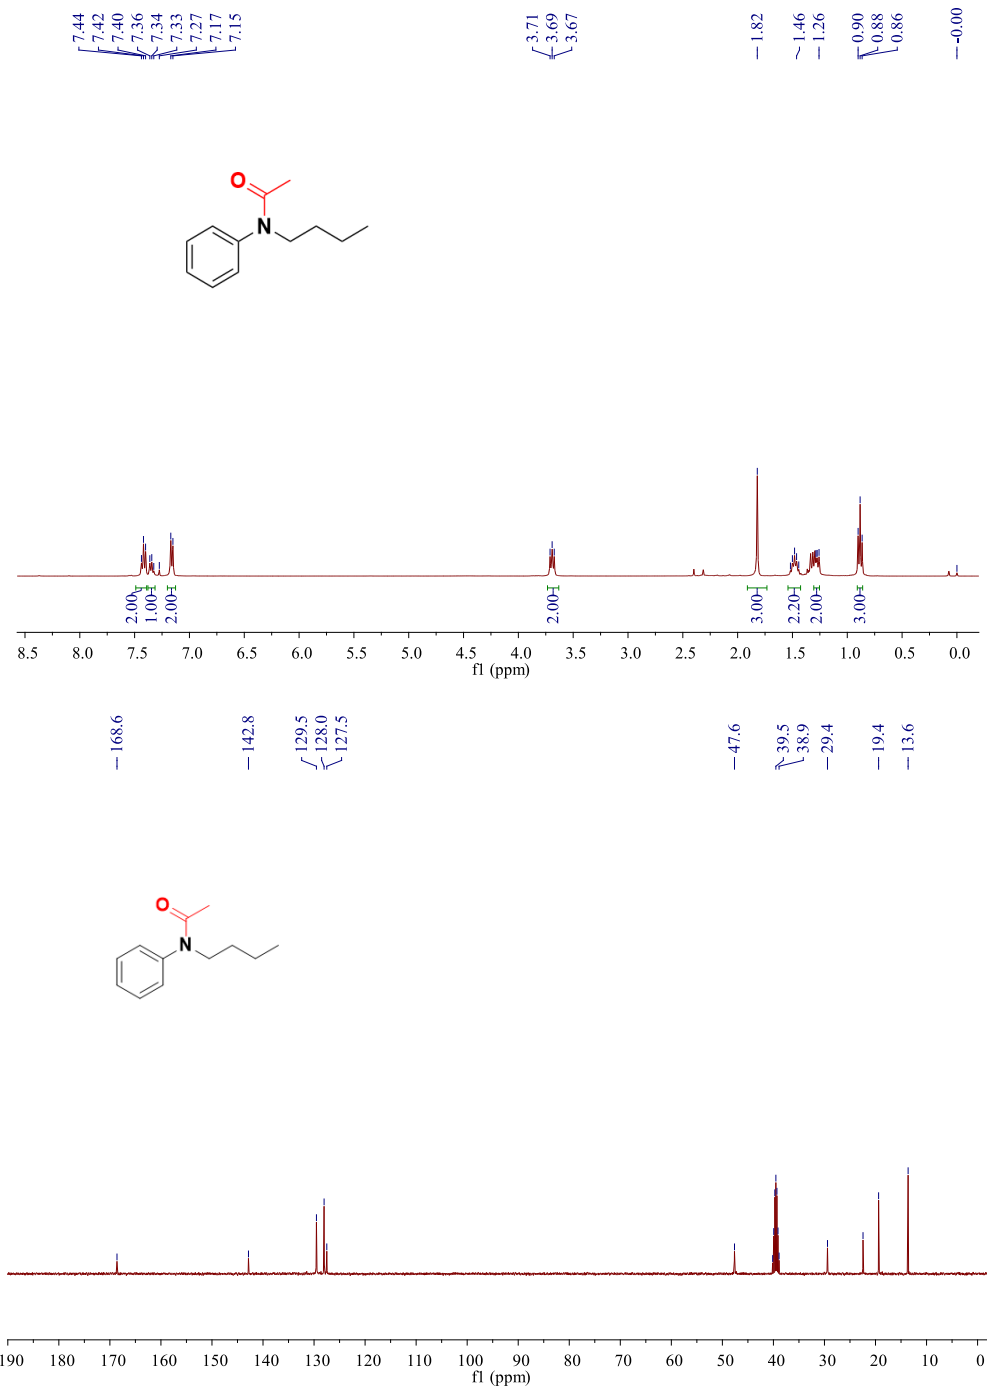

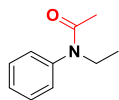

**N-Ethyl-N-phenylacetamide (5be)**

dichloromethane / ethyl acetate = 1:1, yellow solid, 73% yield (23.7 mg). mp: 48 – 50°C. <sup>1</sup>H NMR (400 MHz, DMSO) δ 7.47 – 7.44 (m, 2H), 7.38 – 7.35 (m, 1H), 7.29 – 7.27 (m, 1H), 3.63 (q, *J* = 7.1 Hz, 2H), 1.70 (s, 3H), 0.98 (t, *J* = 7.1 Hz, 3H). <sup>13</sup>C NMR (100 MHz, DMSO) δ 168.4, 142.61, 129.6, 128.2, 127.6, 43.0, 22.5, 12.9. HRMS (ESI-TOF): Anal Calcd. For. C<sub>10</sub>H<sub>13</sub>NO+H<sup>+</sup>: 164.1070, Found: 164.1068. IR (neat, cm<sup>-1</sup>): ν 3368, 2932, 1640, 1594, 1496, 1300, 1259, 1046, 990, 826, 765.

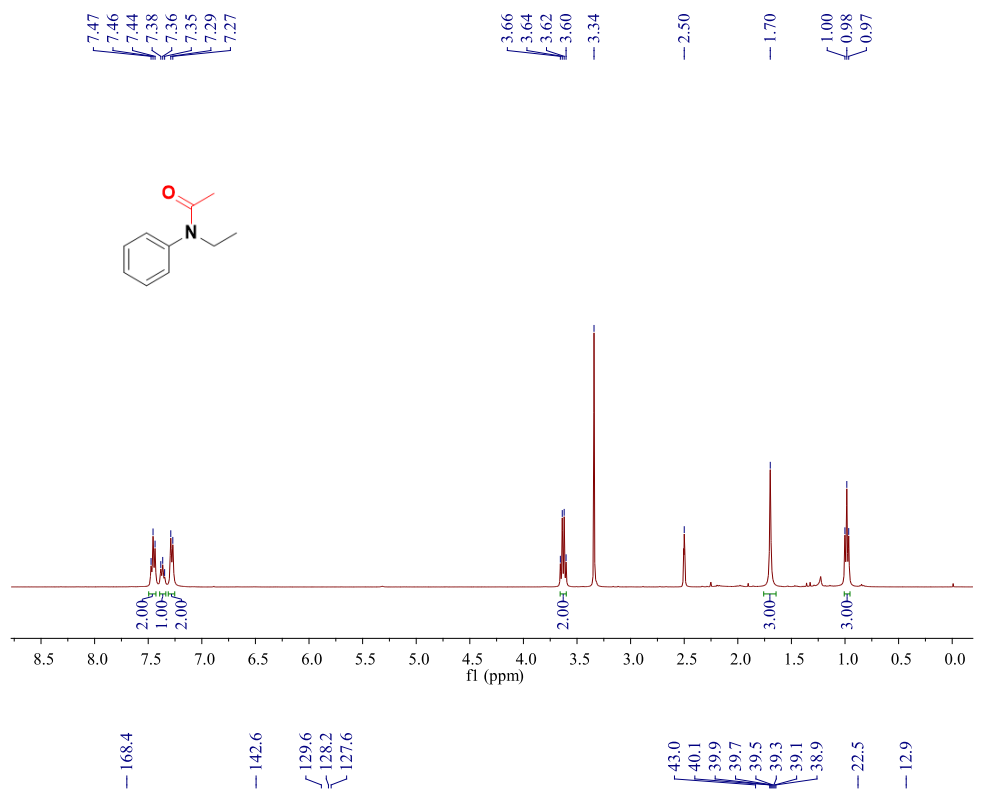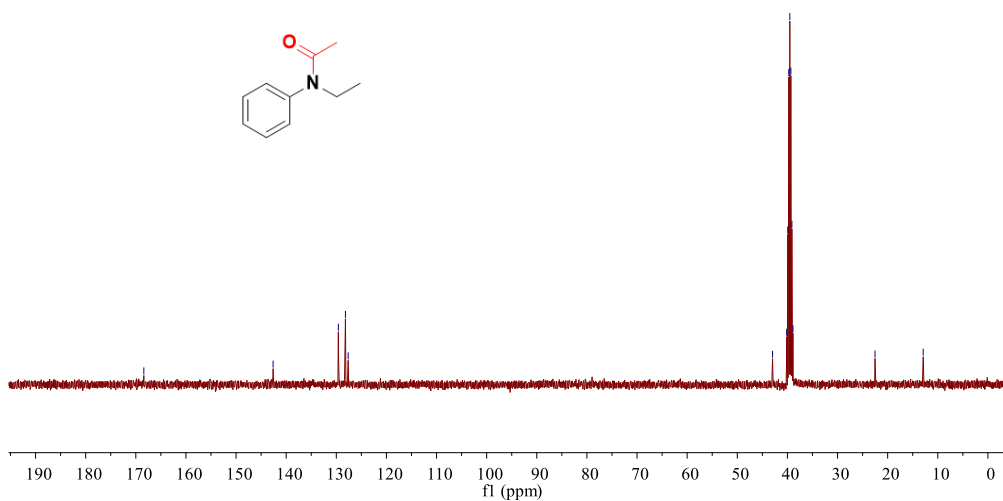

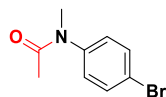

***N*-(4-bromophenyl)-*N*-methylacetamide (5bf)**

petroleum ether / ethyl acetate = 2:1, yellow solid, 80% yield (36.5 mg). mp: 95 – 97°C. <sup>1</sup>H NMR (400 MHz, CDCl<sub>3</sub>) δ 7.55 (d, *J* = 8.4 Hz, 2H), 7.10 (d, *J* = 8.4 Hz, 2H), 3.25 (s, 3H), 1.88 (s, 3H). <sup>13</sup>C NMR (100 MHz, CDCl<sub>3</sub>) δ 170.0, 143.4, 132.7, 128.6, 121.2, 36.9, 22.2. HRMS (ESI-TOF): Anal Calcd. For. C<sub>9</sub>H<sub>10</sub><sup>79</sup>BrNO+H<sup>+</sup>: 228.0019, Found: 228.0014; C<sub>9</sub>H<sub>10</sub><sup>81</sup>BrNO+H<sup>+</sup>: 229.9998, Found: 229.9994. IR (neat, cm<sup>-1</sup>): ν 3395, 3060, 2932, 1649, 1587, 1484, 1371, 1179, 1084, 837, 722, 643.

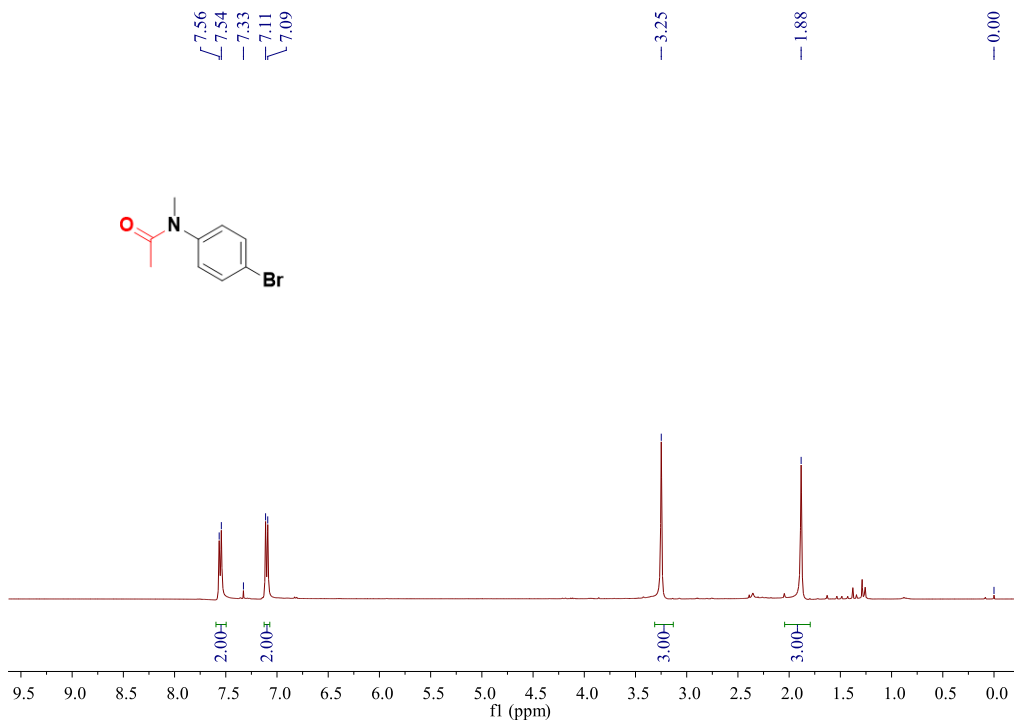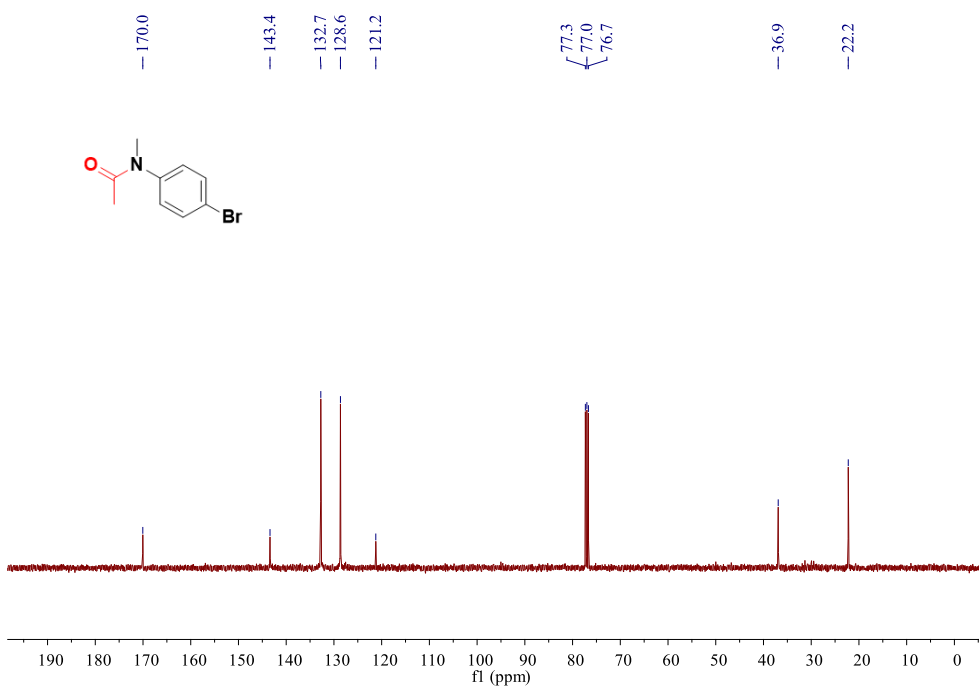



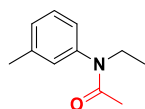

**N-Ethyl-N-(m-tolyl)acetamide (5bg)**

petroleum ether / ethyl acetate = 5:1, yellow oil, 70% yield (24.6 mg).  $^1\text{H NMR}$  (400 MHz,  $\text{CDCl}_3$ )  $\delta$  7.30 (t,  $J = 7.6$  Hz, 1H), 7.16 (d,  $J = 7.6$  Hz, 1H), 6.98 – 6.95 (m, 2H), 3.74 (q,  $J = 7.2$  Hz, 2H), 2.39 (s, 3H), 1.83 (s, 3H), 1.11 (s, 3H).  $^{13}\text{C NMR}$  (100 MHz,  $\text{CDCl}_3$ )  $\delta$  169.9, 142.6, 139.5, 129.2, 128.5, 128.4, 125.0, 43.6, 22.6, 21.1, 12.9. **HRMS** (ESI-TOF): Anal Calcd. For.  $\text{C}_{11}\text{H}_{15}\text{NO}+\text{H}^+$ : 178.1226, Found: 178.1223. **IR** (neat,  $\text{cm}^{-1}$ ):  $\nu$  3481, 2974, 2874, 1653, 1586, 1445, 1395, 1299, 1192, 838, 706, 626.

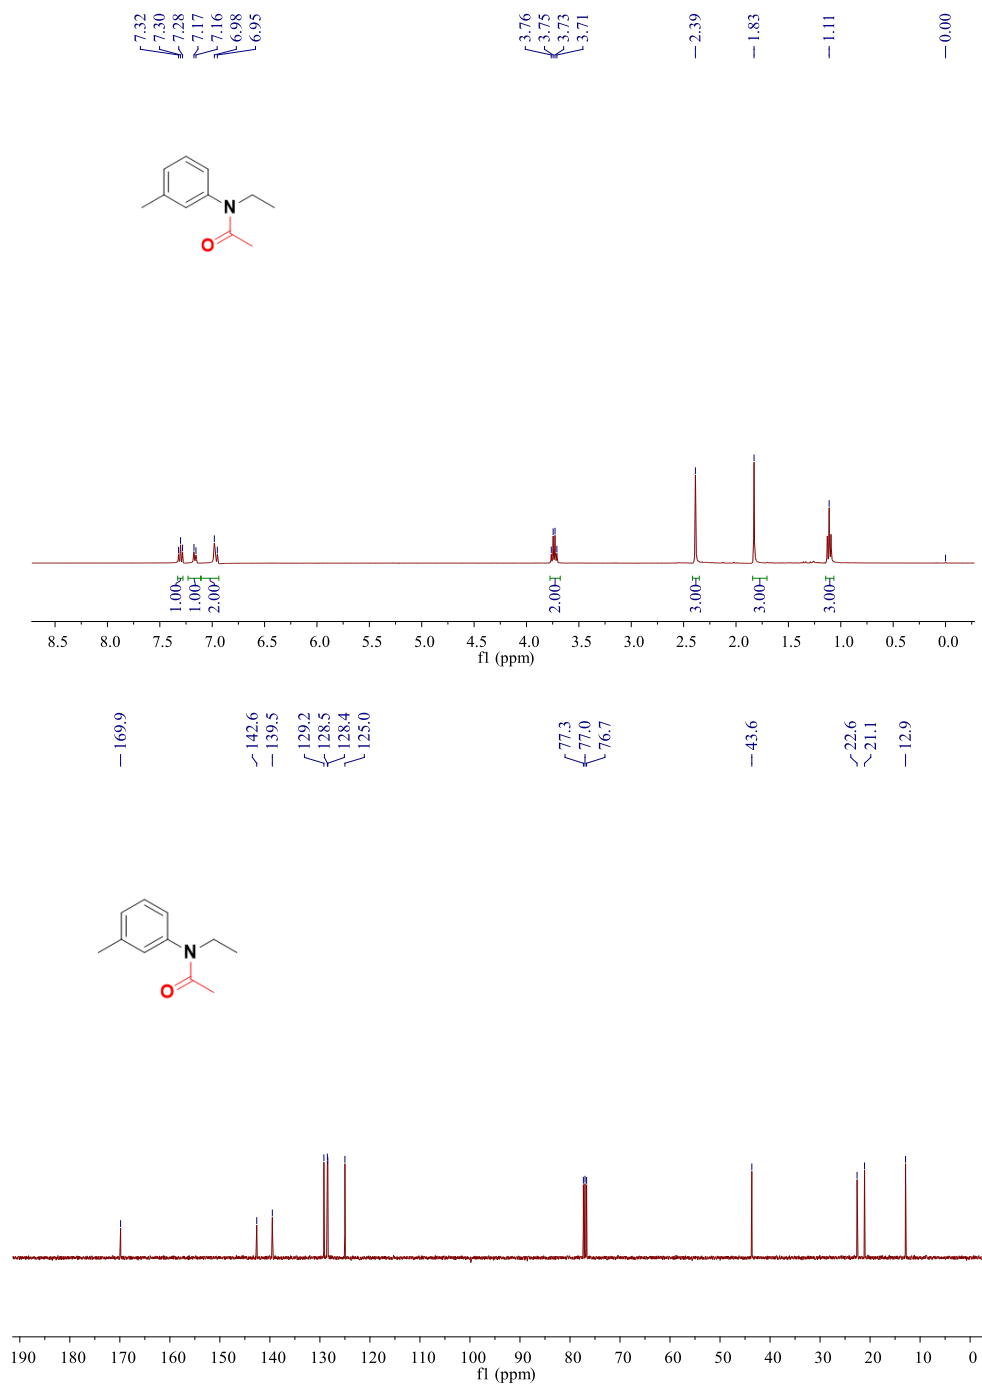

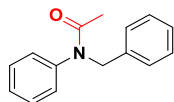

***N*-Benzyl-*N*-phenylacetamide (5bh)**

petroleum ether / ethyl acetate = 1:1, yellow solid, 69% yield (31.0 mg). mp: 55 – 57°C. <sup>1</sup>H NMR (400 MHz, CDCl<sub>3</sub>) δ 7.34 – 7.18 (m, 8H), 6.99 – 6.97 (m, 2H), 4.89 (s, 2H), 1.88 (s, 3H). <sup>13</sup>C NMR (100 MHz, CDCl<sub>3</sub>) δ 170.3, 142.8, 137.4, 129.5, 128.7, 128.3, 128.2, 127.8, 127.3, 52.7, 22.7. HRMS (ESI-TOF): Anal Calcd. For. C<sub>15</sub>H<sub>15</sub>NO+H<sup>+</sup>: 226.1226, Found:226.1222. IR (neat, cm<sup>-1</sup>): ν 2931, 1650, 1596, 1496, 1397, 1212, 1029, 906, 726, 647.

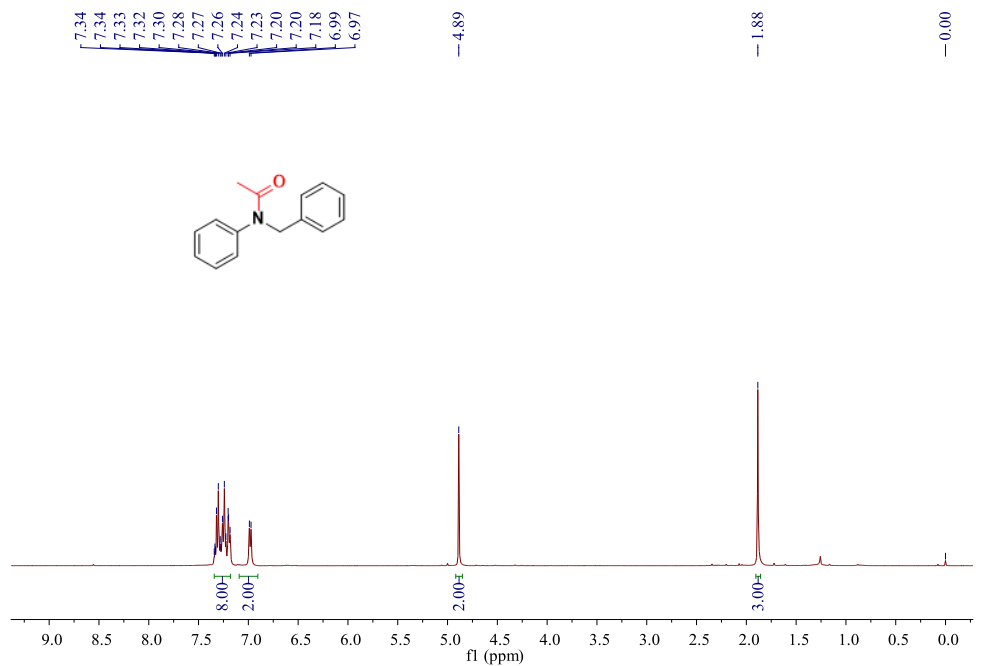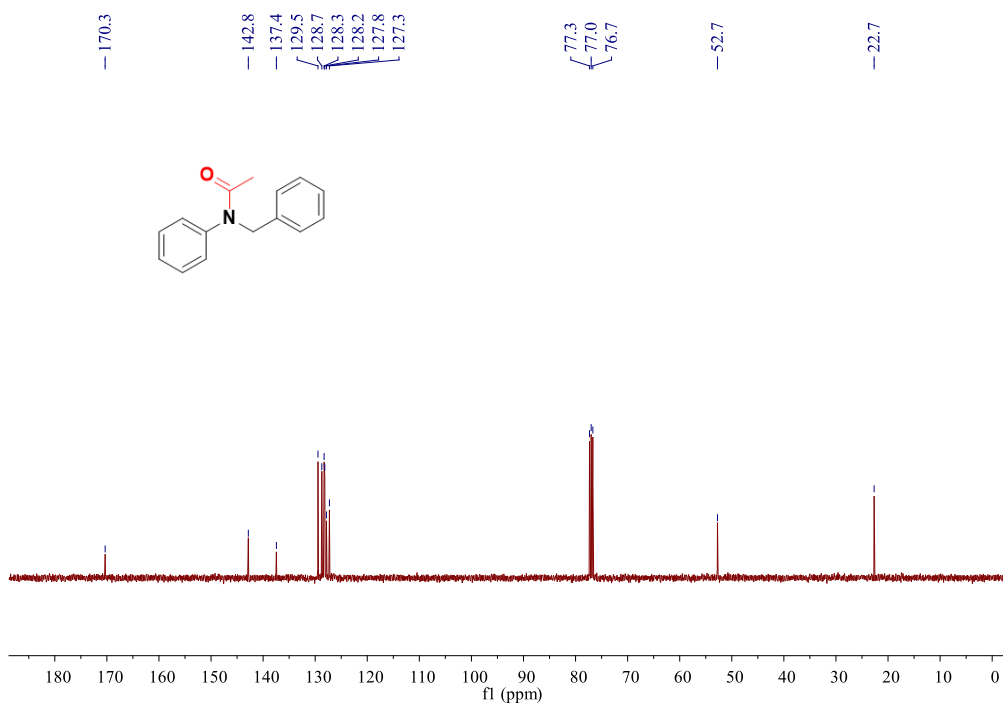

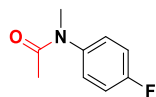

***N*-(4-Fluorophenyl)-*N*-methylacetamide (Sbi)**

petroleum ether / ethyl acetate = 2:1, yellow solid, 74% yield (25.5 mg). mp: 60 – 63°C. <sup>1</sup>H NMR (400 MHz, CDCl<sub>3</sub>) δ 7.12 – 7.09 (m, 2H), 7.04 – 7.00 (m, 2H), 3.15 (s, 3H), 1.76 (s, 3H). <sup>13</sup>C NMR (100 MHz, CDCl<sub>3</sub>) δ 170.2, 161.3 (d, *J* = 247.7 Hz), 140.3 (d, *J* = 3.2 Hz), 128.6 (d, *J* = 8.6 Hz), 116.3 (d, *J* = 22.7 Hz), 36.9, 22.0. <sup>19</sup>F NMR (377 MHz, CDCl<sub>3</sub>) δ -113.7. HRMS (ESI-TOF): Anal Calcd. For. C<sub>9</sub>H<sub>10</sub>FNO+H<sup>+</sup>: 168.0819, Found: 168.0817. IR (neat, cm<sup>-1</sup>): ν 2934, 1767, 1652, 1509, 1423, 1354, 1222, 910, 726, 645.

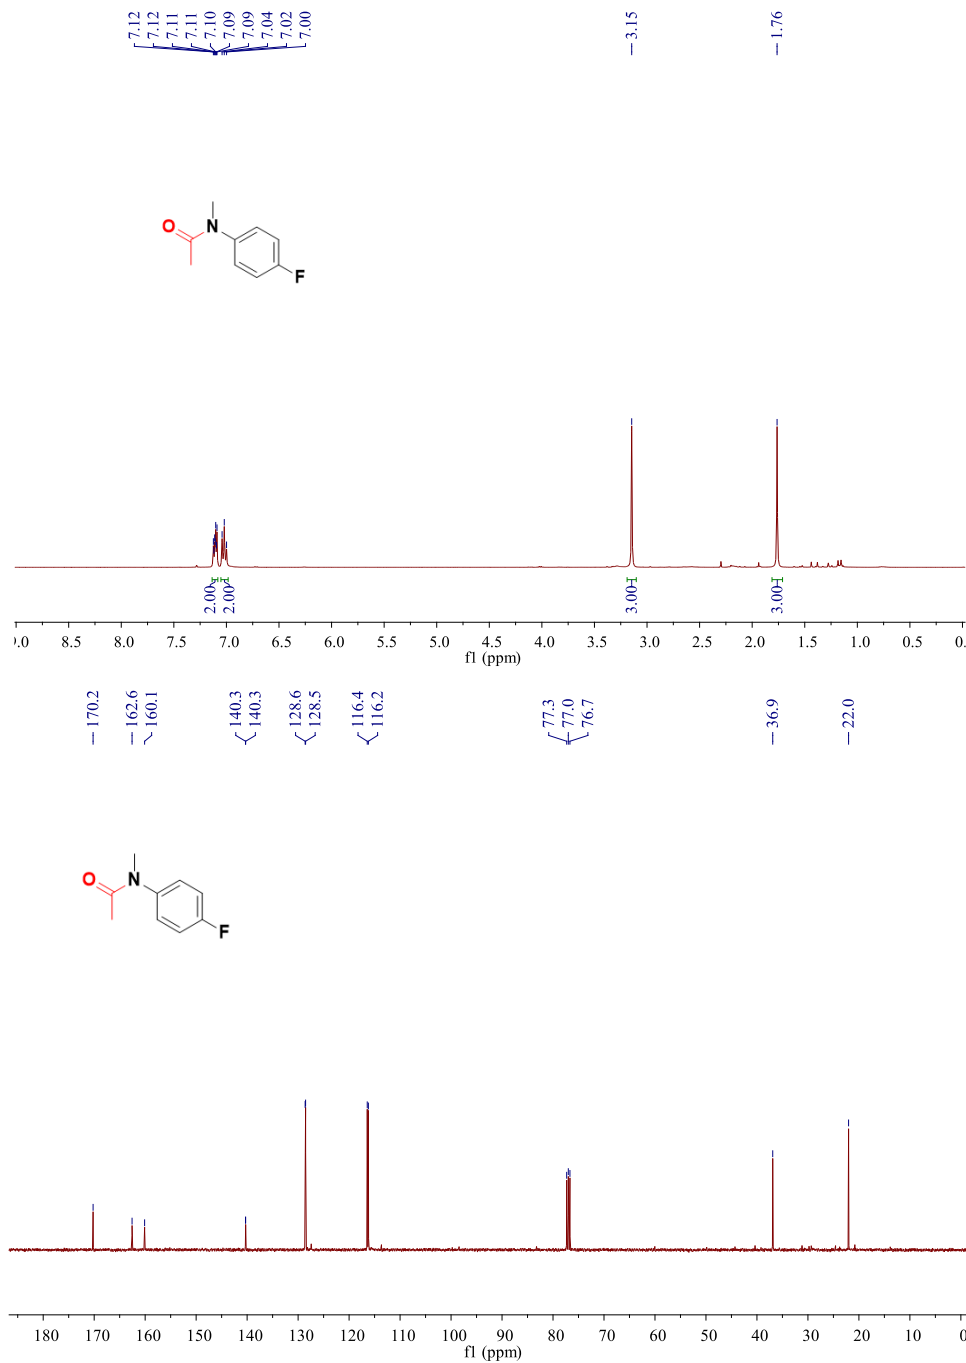

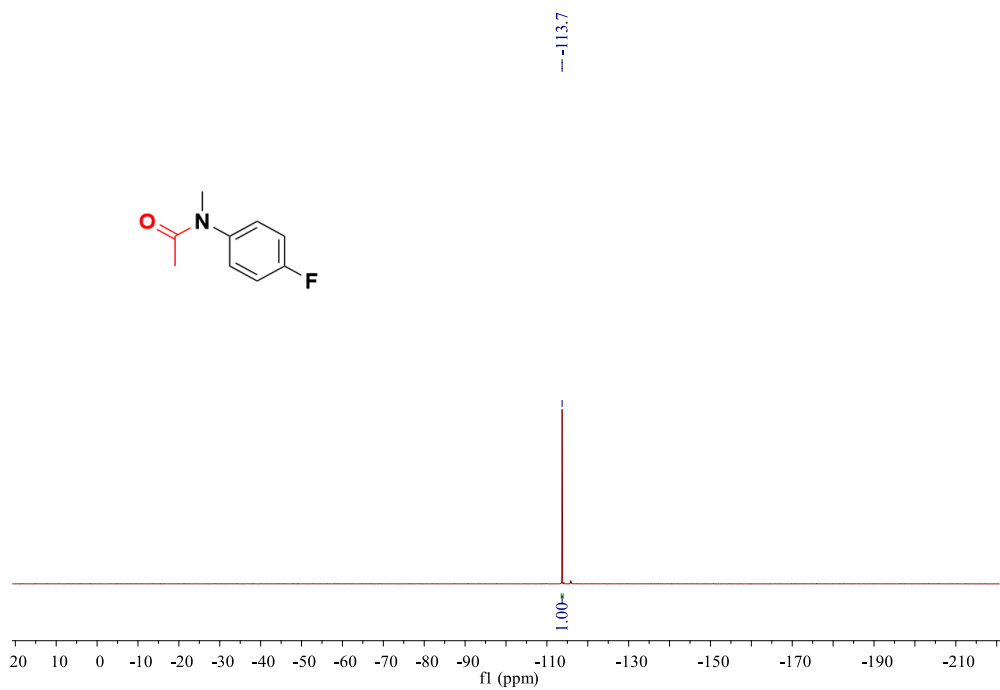

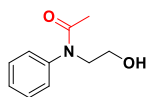

**N-(2-Hydroxyethyl)-N-phenylacetamide (5bj)**

dichloromethane / ethyl acetate = 1:1, yellow solid, 63% yield (22.5 mg). mp: 59 – 61°C. <sup>1</sup>H NMR (400 MHz, DMSO) δ 7.46 – 7.42 (m, 2H), 7.37 – 7.32 (m, 3H), 4.67 (s, 1H), 3.65 (t, *J* = 6.5 Hz, 2H), 3.43 (dd, *J* = 11.9, 6.5 Hz, 2H), 1.71 (s, 3H). <sup>13</sup>C NMR (100 MHz, DMSO) δ 169.1, 143.4, 129.5, 128.2, 127.6, 57.9, 50.9, 22.6. HRMS (ESI-TOF): Anal Calcd. For. C<sub>10</sub>H<sub>13</sub>NO<sub>2</sub>+H<sup>+</sup>: 180.1019, Found: 180.1016. IR (neat, cm<sup>-1</sup>): ν 3384, 3063, 2927, 2878, 1716, 1630, 1593, 1494, 1397, 1279, 996, 852, 733.

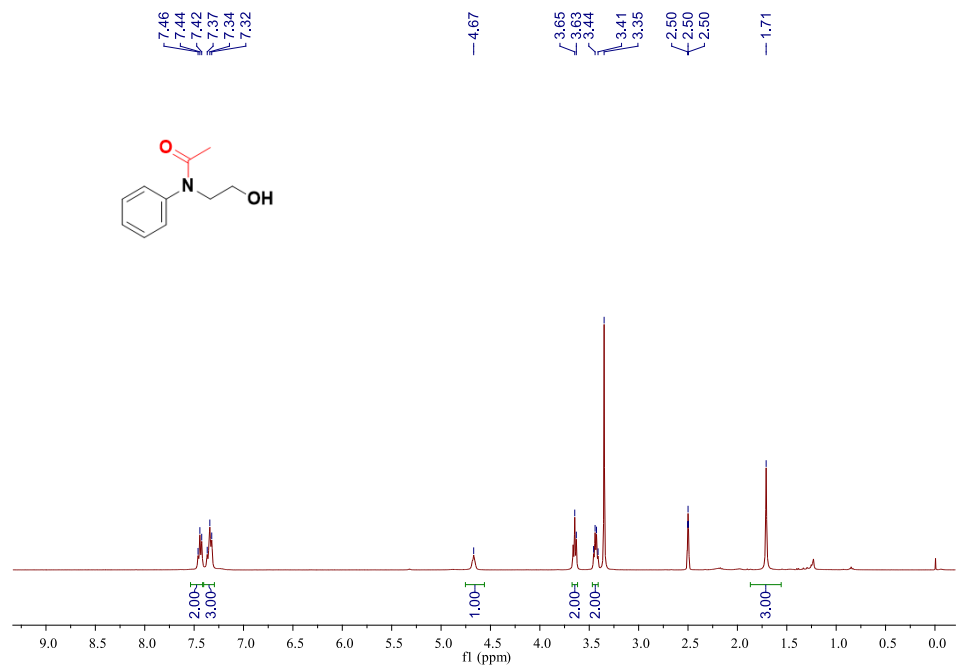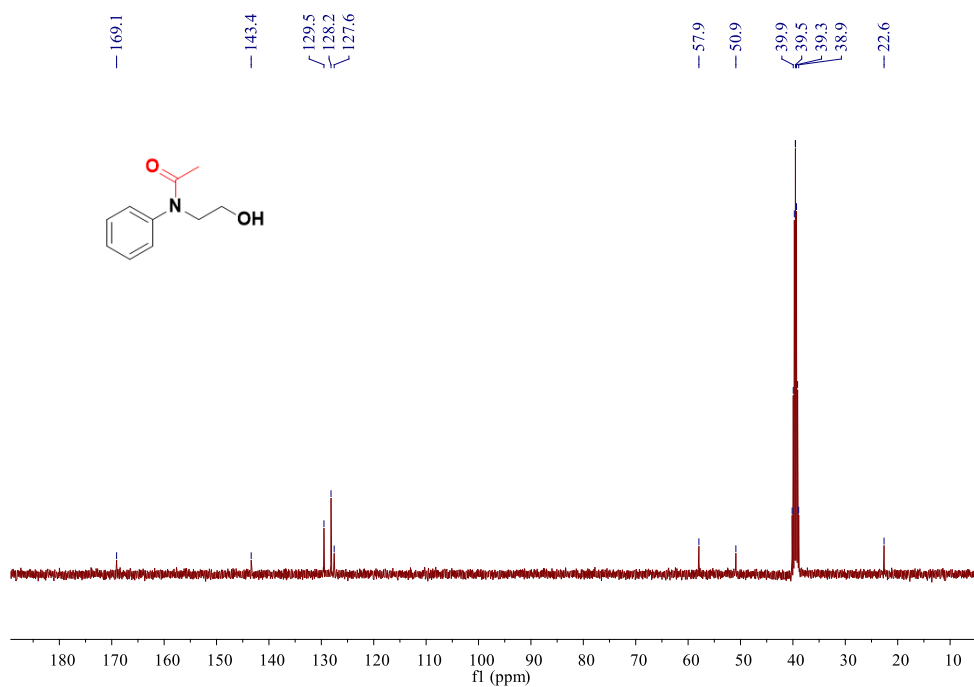

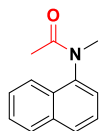

***N*-Methyl-*N*-(naphthalen-1-yl)acetamide (5bk)**

petroleum ether / ethyl acetate = 2:1, yellow solid, 52% yield (20.5 mg). mp: 90 – 93°C. <sup>1</sup>H NMR (400 MHz, DMSO) δ 8.06 – 8.03 (m, 1H), 8.00 – 7.98 (m, 1H), 7.75 – 7.73 (m, 1H), 7.66-7.52 (m, 4H), 3.22 (s, 3H), 1.61 (s, 3H). <sup>13</sup>C NMR (100 MHz, DMSO) δ 169.6, 140.4, 134.3, 129.5, 128.4, 127.6, 126.7, 126.2, 125.8, 121.9, 36.5, 21.6. HRMS (ESI-TOF): Anal Calcd. For. C<sub>13</sub>H<sub>13</sub>NO+H<sup>+</sup>: 200.1070, Found: 200.1067. IR (neat, cm<sup>-1</sup>): ν 1652, 1541, 1488, 1379, 823, 761, 626.

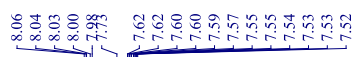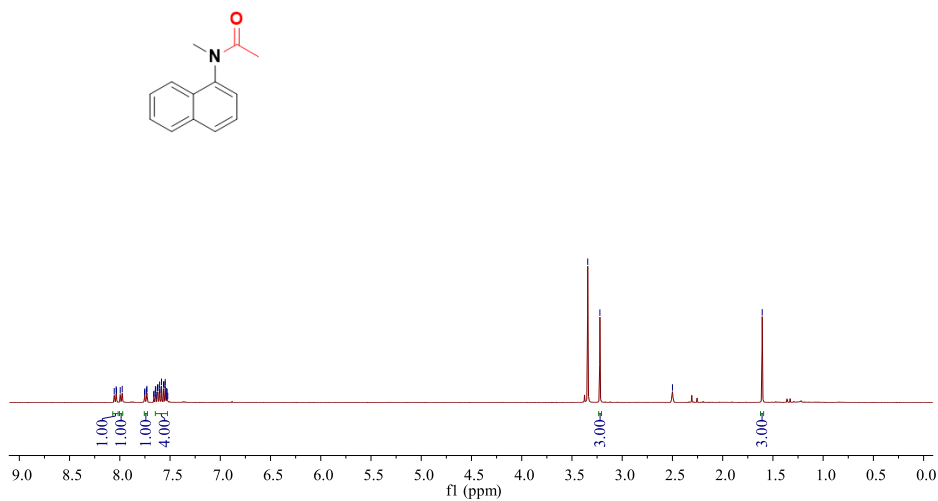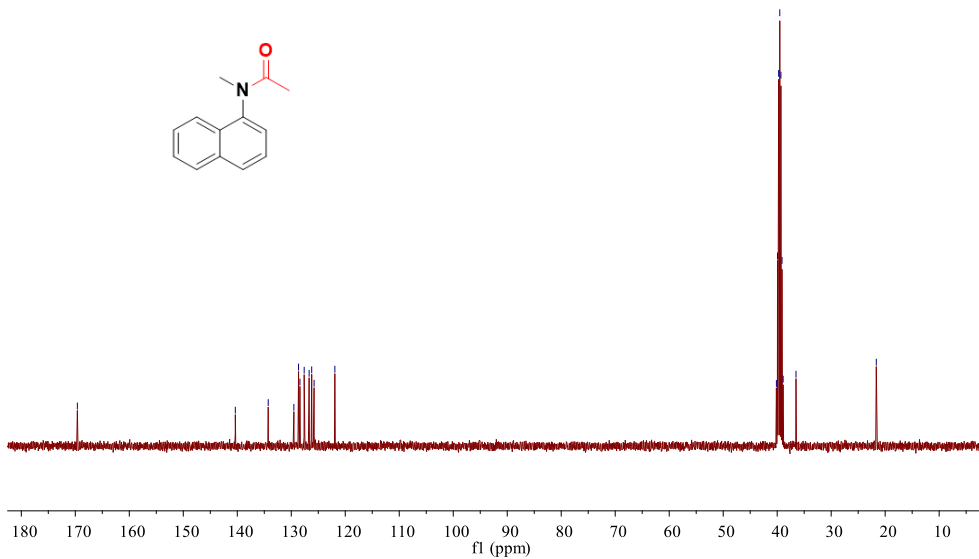

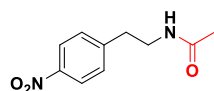

***N*-(4-Nitrophenethyl)acetamide (5bl)**

ethyl acetate, dark red oil, 55% yield (33.2 mg). <sup>1</sup>H NMR (400 MHz, CDCl<sub>3</sub>) δ 8.18 – 8.15 (m, 2H), 7.38 – 7.27 (m, 2H), 5.61 (s, 1H), 3.55 (dd, *J* = 13.2, 6.9 Hz, 2H), 2.95 (t, *J* = 6.9 Hz, 2H), 1.96 (s, 3H). <sup>13</sup>C NMR (100 MHz, DMSO) δ 169.2, 148.1, 146.1, 130.0, 123.4, 34.9, 22.5. HRMS (ESI-TOF): Anal Calcd. For. C<sub>10</sub>H<sub>12</sub>N<sub>2</sub>O<sub>3</sub>+Na<sup>+</sup>: 231.0740, Found: 231.0737. IR (neat, cm<sup>-1</sup>): ν 3299, 2854, 1711, 1661, 1516, 1344, 1256, 855, 746, 697.

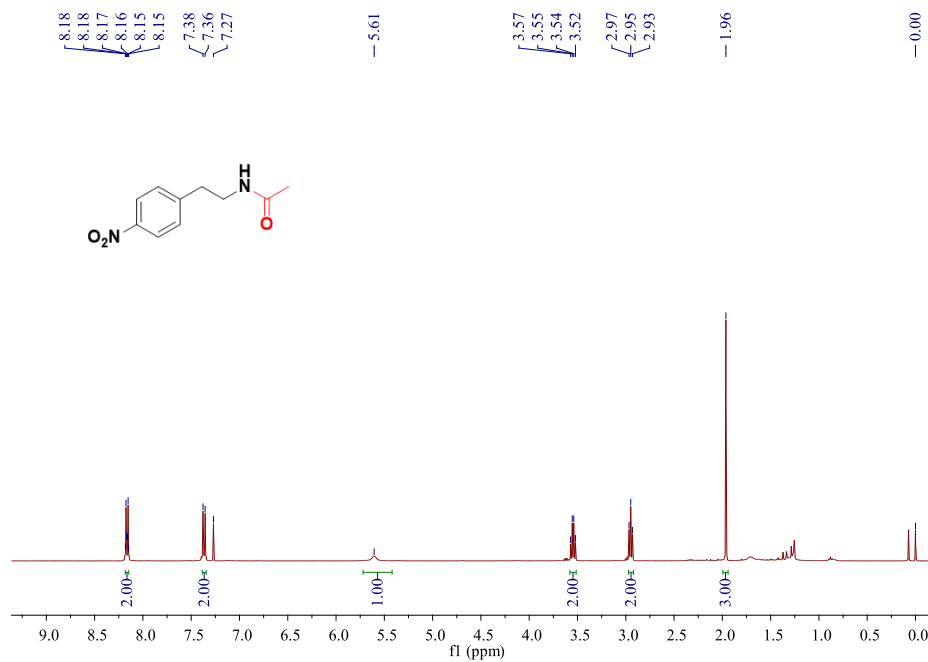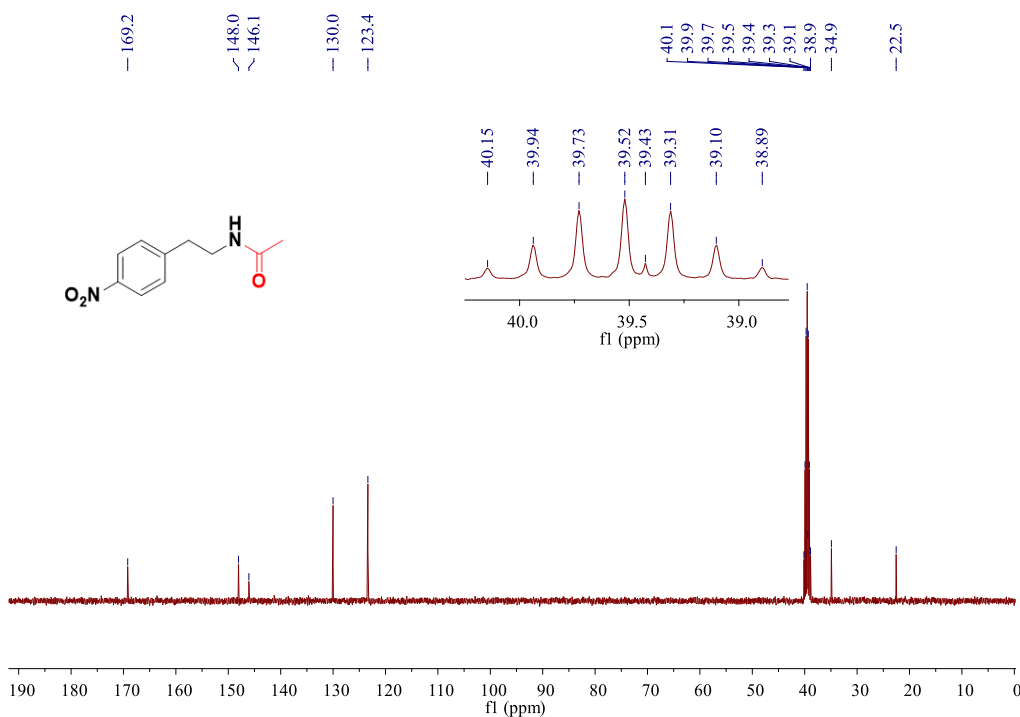

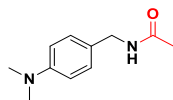

***N*-4-(Dimethylamino)benzylacetamide (5bm)**

petroleum ether / ethyl acetate = 2:1, yellow oil, 55% yield (21.1 mg). <sup>1</sup>H NMR (400 MHz, DMSO) δ 8.15 (s, 1H), 7.07 – 7.04 (m, 2H), 6.69 – 6.65 (m, 2H), 4.11 (d, *J* = 5.8 Hz, 2H), 2.85 (s, 6H), 1.82 (s, 3H). <sup>13</sup>C NMR (100 MHz, DMSO) δ 169.3, 150.1, 128.8, 127.5, 112.9, 42.2, 40.8, 40.6, 40.4, 40.2, 40.0, 39.8, 39.6, 39.3, 23.1. HRMS (ESI-TOF): Anal Calcd. For. C<sub>11</sub>H<sub>16</sub>N<sub>2</sub>O+H<sup>+</sup>: 193.1335, Found: 193.1333. IR (neat, cm<sup>-1</sup>): ν 3393, 2958, 1652, 1541, 1457, 1362, 1229, 1048, 993, 824, 762, 628.

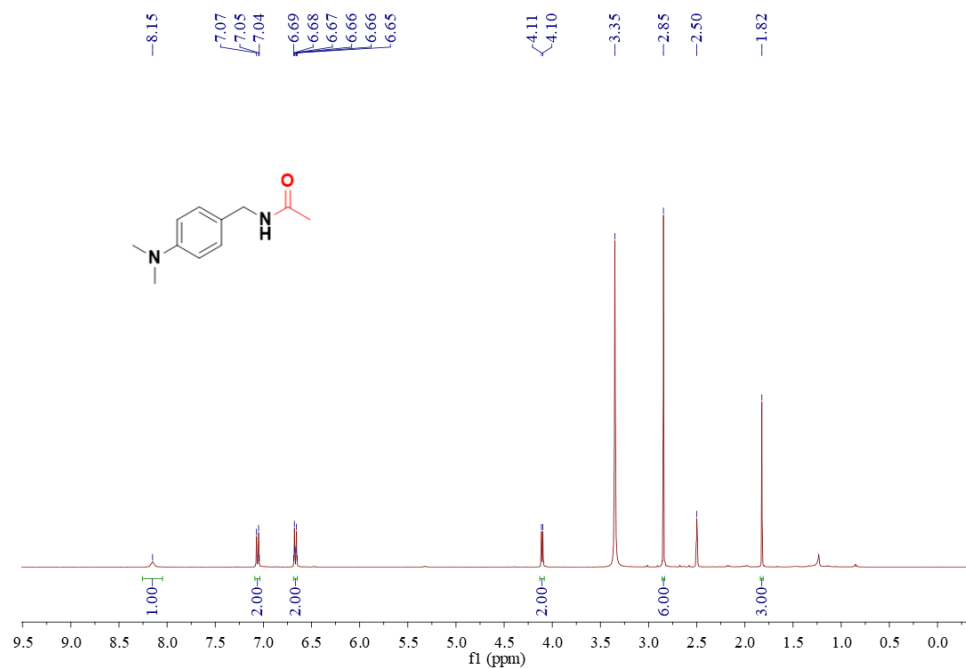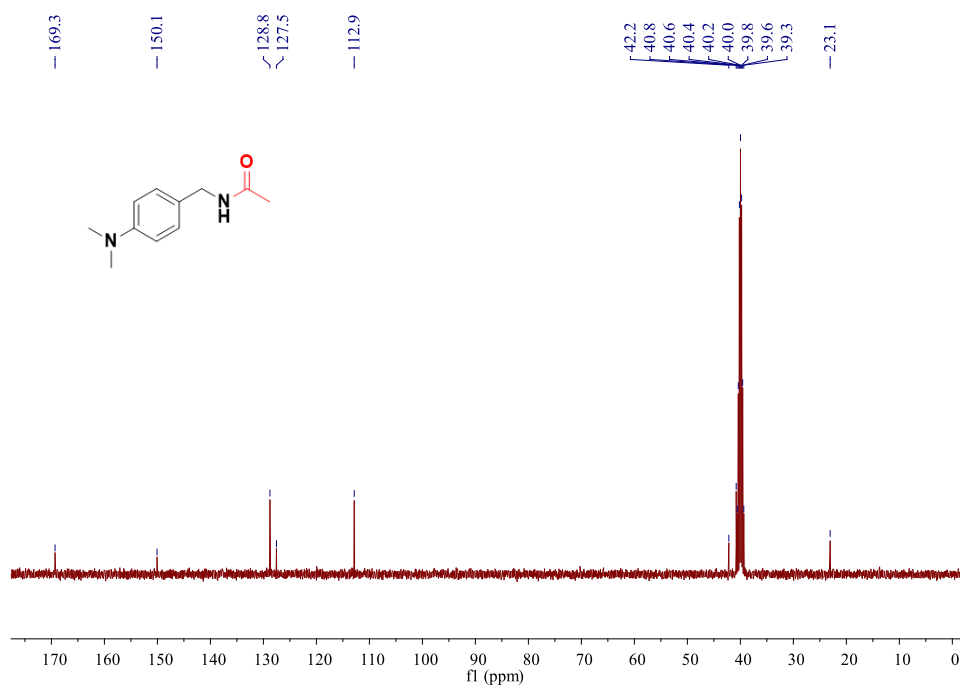



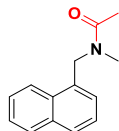

***N*-Methyl-*N*-(naphthalen-1-ylmethyl)acetamide (5bn)**

dichloromethane / ethyl acetate = 10:1, yellow oil, 50% yield (20.9 mg). **<sup>1</sup>H NMR** (400 MHz, DMSO) δ 8.11 – 7.93 (m, 2H), 7.86 (d, *J* = 8.2 Hz, 1H), 7.59 – 7.46 (m, 3H), 7.37 – 7.14 (m, 1H), 5.06 (minor isomer, s, 2H), 4.96 (major isomer, s, 3H), 2.90 (minor isomer, s, 3H), 2.90 (minor isomer, s, 3H), 2.10 (major isomer, s, 3H), 2.00 (minor isomer, s, 3H). **<sup>13</sup>C NMR** (100 MHz, CDCl<sub>3</sub>) δ 171.6, 170.5, 133.8, 133.7, 132.6, 131.6, 131.3, 130.6, 129.0, 128.5, 128.4, 128.0, 127.0, 126.5, 126.4, 126.0, 125.9, 125.5, 125.1, 123.9, 122.3, 121.9, 52.0, 48.3, 34.8, 34.3, 22.0, 21.2. **HRMS** (ESI-TOF): Anal Calcd. For. C<sub>14</sub>H<sub>15</sub>NO+H<sup>+</sup>: 214.1226, Found: 214.1222. **IR** (neat, cm<sup>-1</sup>): ν 2961, 1636, 1510, 1485, 1398, 1260, 906, 725, 645.

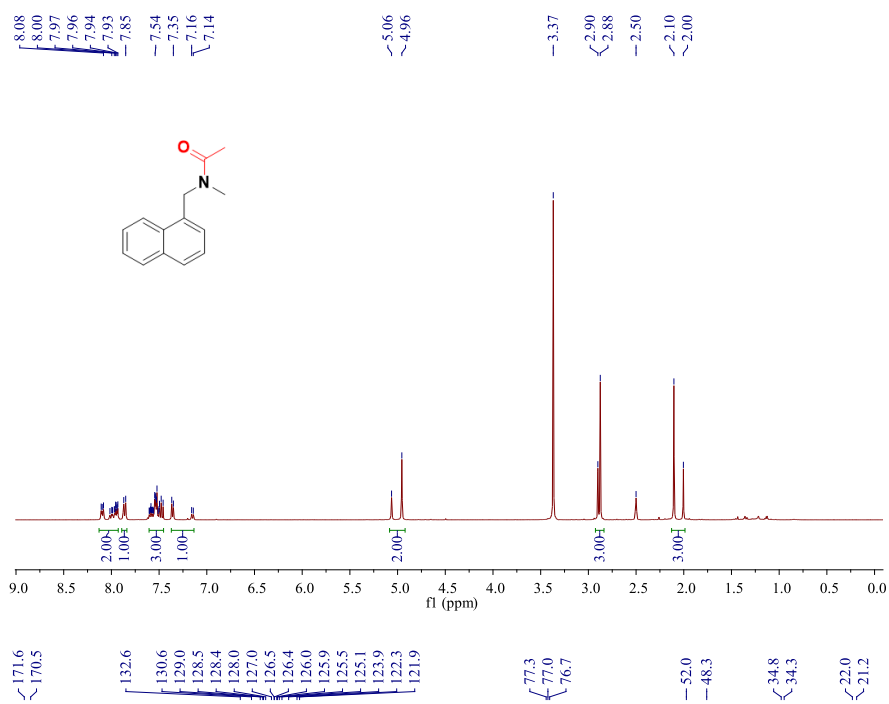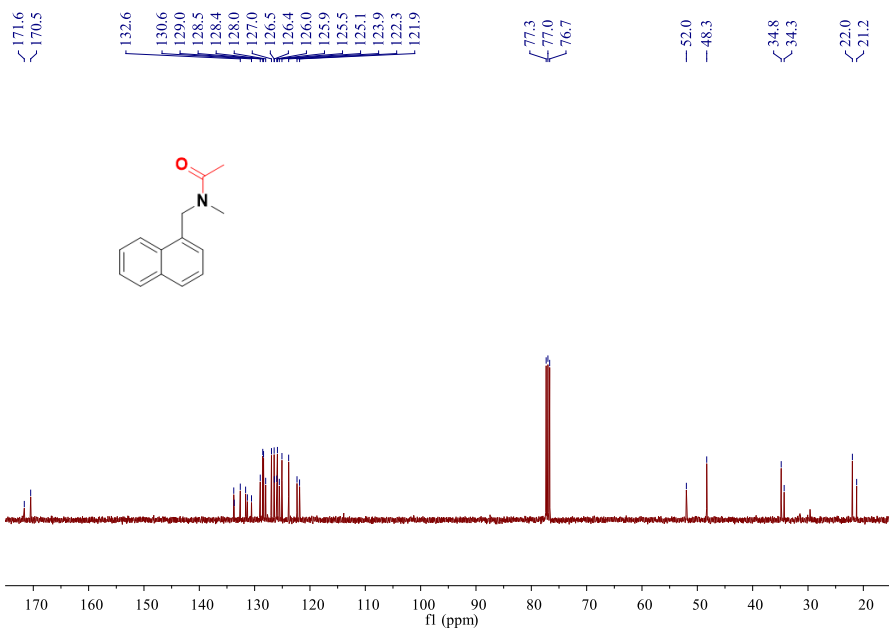

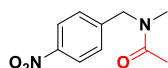

***N*-methyl-*N*-(4-nitrobenzyl)acetamide (5bo)**

petroleum ether / ethyl acetate = 1:1, yellow solid, 65% yield (26.4 mg). mp: 80 – 83°C. **<sup>1</sup>H NMR** (400 MHz, DMSO) δ 8.25 – 8.18 (m, 2H), 7.49 – 7.47 (m, 2H), 4.72 (minor isomer, s, 2H), 4.61 (major isomer, s, 2H), 2.96 (major isomer, s, 3H), 2.82 (minor isomer, s, 3H), 2.09 (major isomer, s, 3H), 2.02 (minor isomer, s, 3H). **<sup>13</sup>C NMR** (100 MHz, DMSO) δ 170.8, 170.5, 147.1, 146.6, 128.9, 128.2, 124.4, 124.1, 53.3, 50.0, 36.3, 33.8, 21.9, 21.7. **HRMS** (ESI-TOF): Anal Calcd. For. C<sub>10</sub>H<sub>12</sub>N<sub>2</sub>O<sub>3</sub>+H<sup>+</sup>: 209.0921, Found: 209.0918. **IR** (neat, cm<sup>-1</sup>): ν 1635, 1519, 1473, 1407, 1346, 1249, 1049, 858, 736.

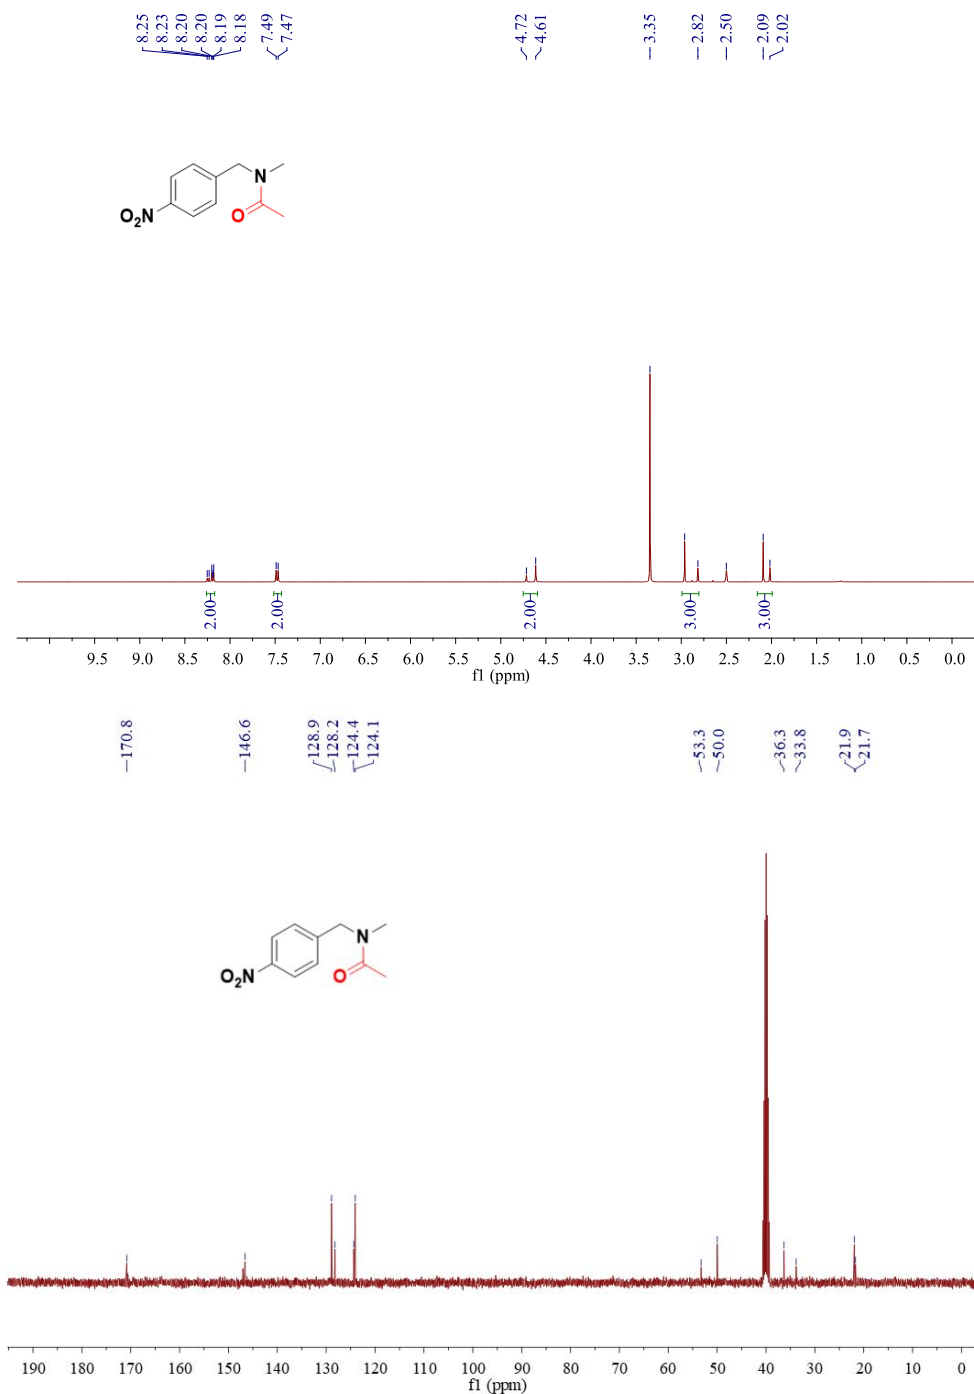

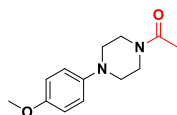

**1-(4-(4-Methoxyphenyl)piperazin-1-yl)ethan-1-one (5bp)**

petroleum ether / ethyl acetate = 1:1, yellow solid, 60% yield (27.7 mg). mp: 74 – 76°C. <sup>1</sup>H NMR (400 MHz, DMSO) δ 6.92 – 6.90 (m, 2H), 6.84 – 6.82 (m, 2H), 3.68 (s, 3H), 3.55 (dd, *J* = 10.3, 5.5 Hz, 4H), 3.01 – 2.98 (m, 2H), 2.94 – 2.92 (m, 2H), 2.03 (s, 3H). <sup>13</sup>C NMR (100 MHz, DMSO) δ 168.45, 153.4, 145.3, 118.2, 114.4, 55.3, 50.3, 49.9, 45.8, 40.9, 21.2. HRMS (ESI-TOF): Anal Calcd. For. C<sub>13</sub>H<sub>18</sub>N<sub>2</sub>O<sub>2</sub>+H<sup>+</sup>: 235.1441, Found: 235.1438. IR (neat, cm<sup>-1</sup>): ν 2988, 1626, 1512, 1445, 1331, 1233, 909, 823, 761.

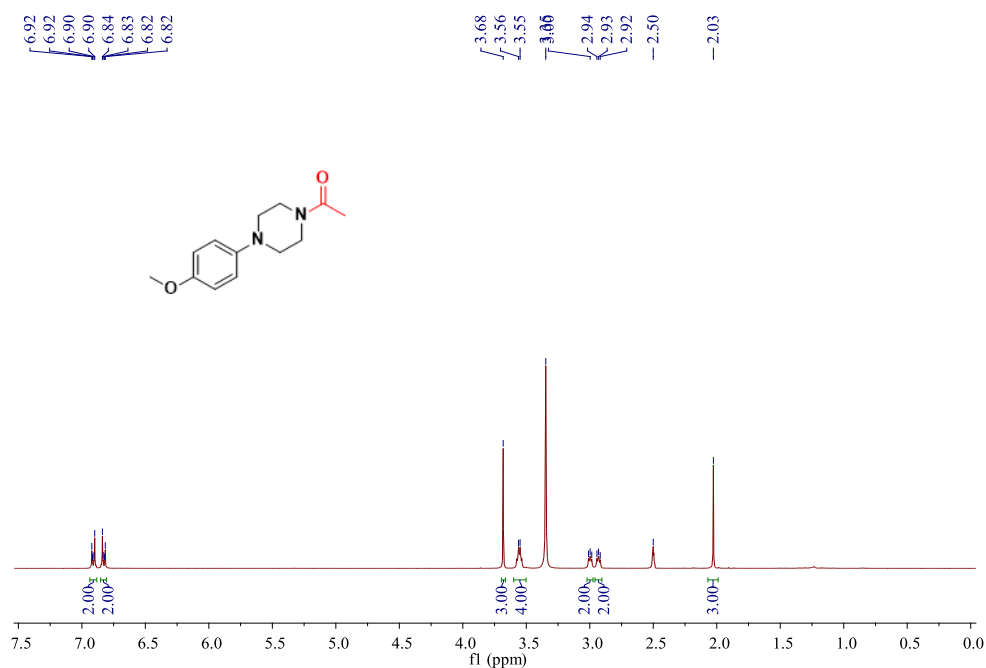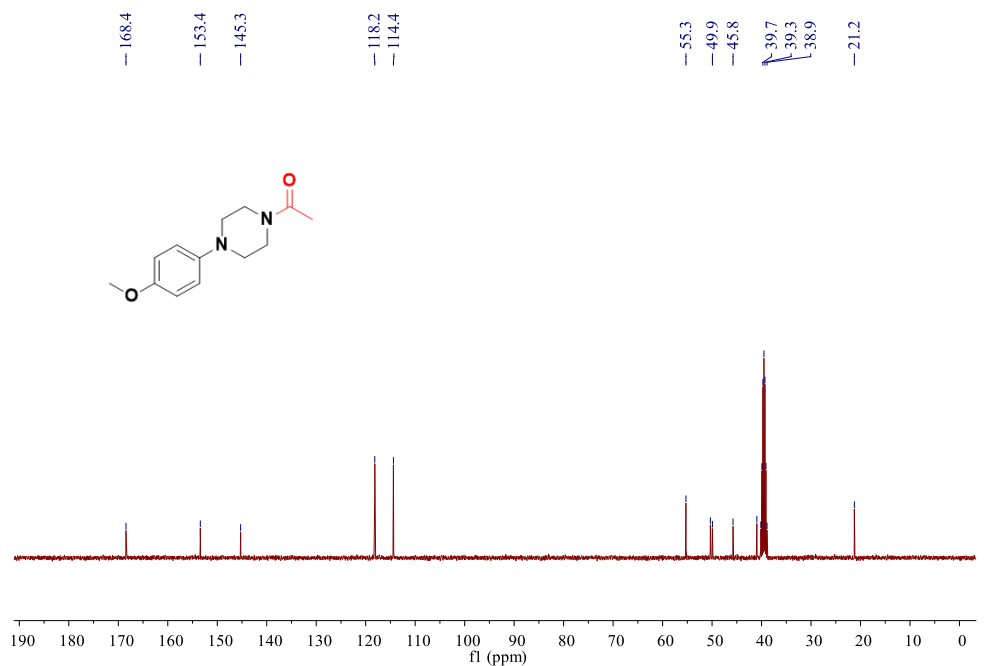

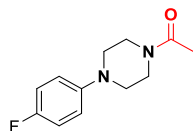

**1-(4-(4-Fluorophenyl)piperazin-1-yl)ethan-1-one (5bq)**

petroleum ether / ethyl acetate = 1:1, yellow solid, 40% yield (17.8 mg). mp: 80 – 82°C. **<sup>1</sup>H NMR** (400 MHz, DMSO) δ 7.08 – 7.04 (m, 2H), 6.99 – 6.95 (m, 2H), 3.58 – 3.54 (m, 2H), 3.09 – 3.06 (m, 2H), 3.02 – 3.00 (m, 2H), 2.03 (s, 3H). **<sup>13</sup>C NMR** (100 MHz, CDCl<sub>3</sub>) δ 169.1, 157.8 (d, *J* = 239.8 Hz), 147.6, 118.6 (d, *J* = 7.9 Hz), 115.7 (d, *J* = 22.2 Hz), 50.8, 50.4, 46.3, 41.5, 21.3. **<sup>19</sup>F NMR** (377 MHz, DMSO) δ -124.9 (s, 1F). **HRMS** (ESI-TOF): Anal Calcd. For. C<sub>12</sub>H<sub>15</sub>FN<sub>2</sub>O+H<sup>+</sup>: 223.1241, Found: 223.1238. **IR** (neat, cm<sup>-1</sup>): ν 1652, 1541, 1488, 1379, 1314, 1823, 761, 626.

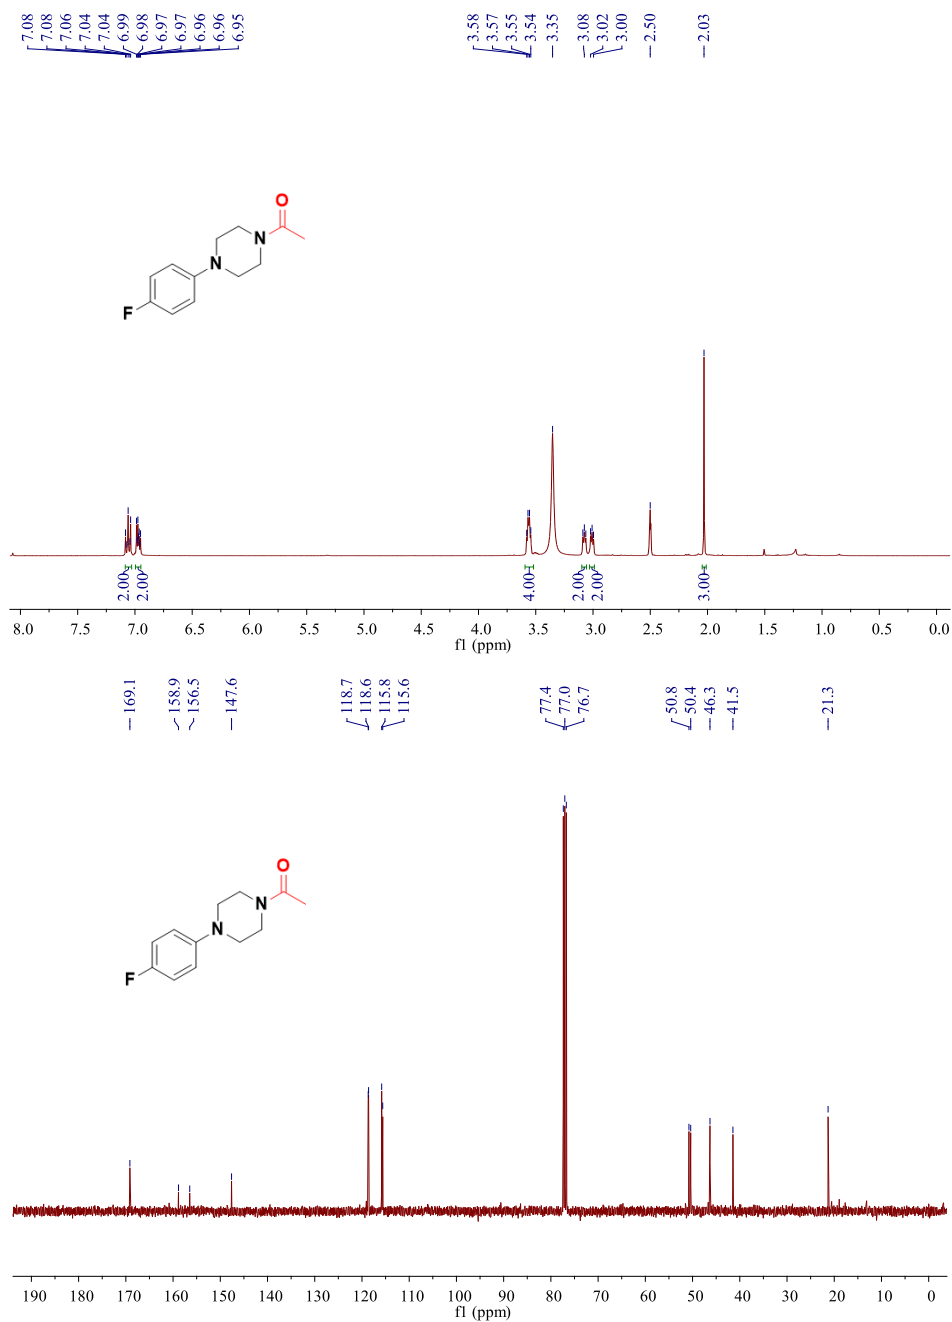

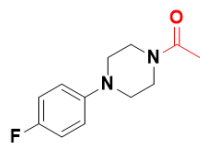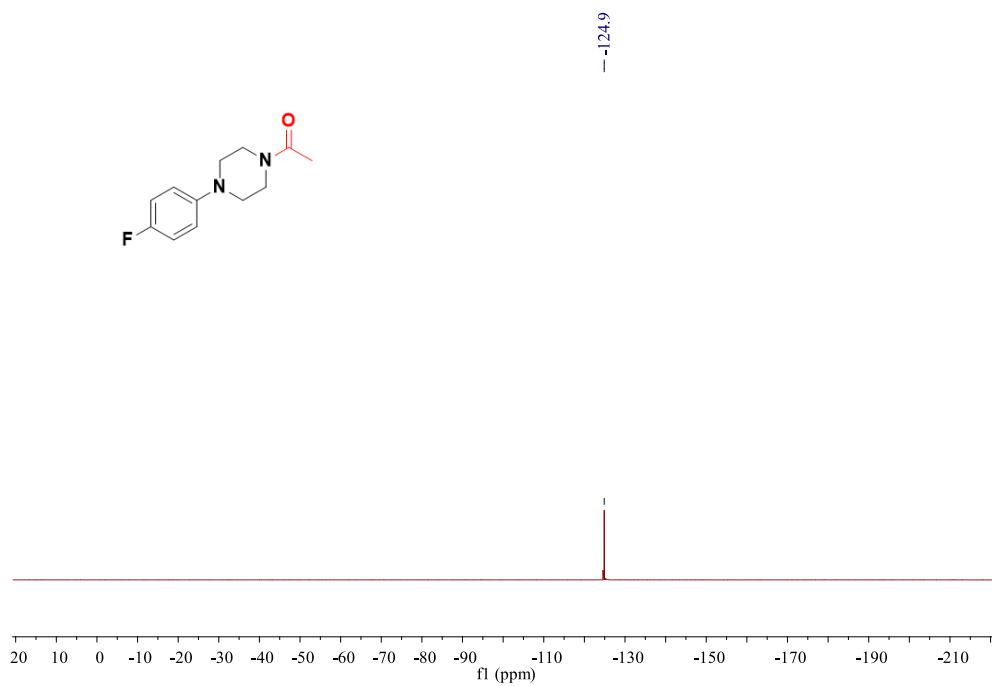

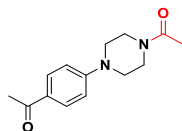

### 1-(4-(4-Acetylphenyl)piperazin-1-yl)ethan-1-one (5br)

petroleum ether / ethyl acetate = 1:2, yellow oil, 45% yield (22.1 mg).  $^1\text{H NMR}$  (400 MHz, DMSO)  $\delta$  7.82 (d,  $J = 9.0$  Hz, 2H), 6.97 (d,  $J = 9.0$  Hz, 2H), 3.57 (dd,  $J = 6.2, 4.3$  Hz, 4H), 3.35 – 3.31 (m, 2H), 2.45 (s, 3H), 2.04 (s, 3H).  $^{13}\text{C NMR}$  (100 MHz, DMSO)  $\delta$  195.7, 168.5, 153.6, 130.1, 126.9, 113.2, 46.7, 46.4, 45.0, 26.1, 21.2. **HRMS** (ESI-TOF): Anal Calcd. For.  $\text{C}_{14}\text{H}_{18}\text{N}_2\text{O}_2 + \text{H}^+$ : 247.1441, Found: 247.1437. **IR** (neat,  $\text{cm}^{-1}$ ):  $\nu$  2950, 1596, 1541, 1498, 1395, 1047, 992, 825, 763.

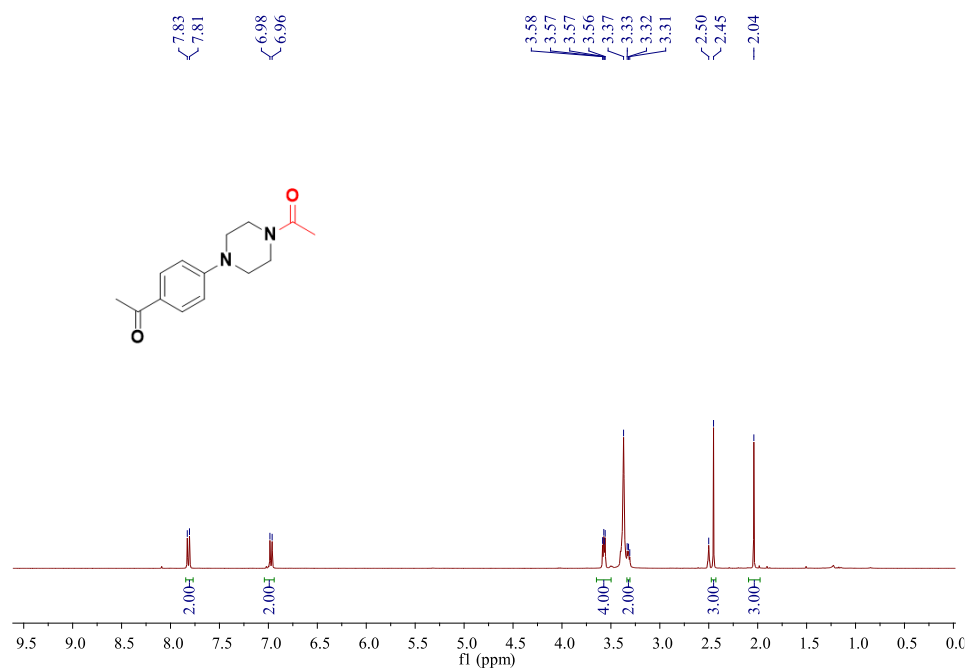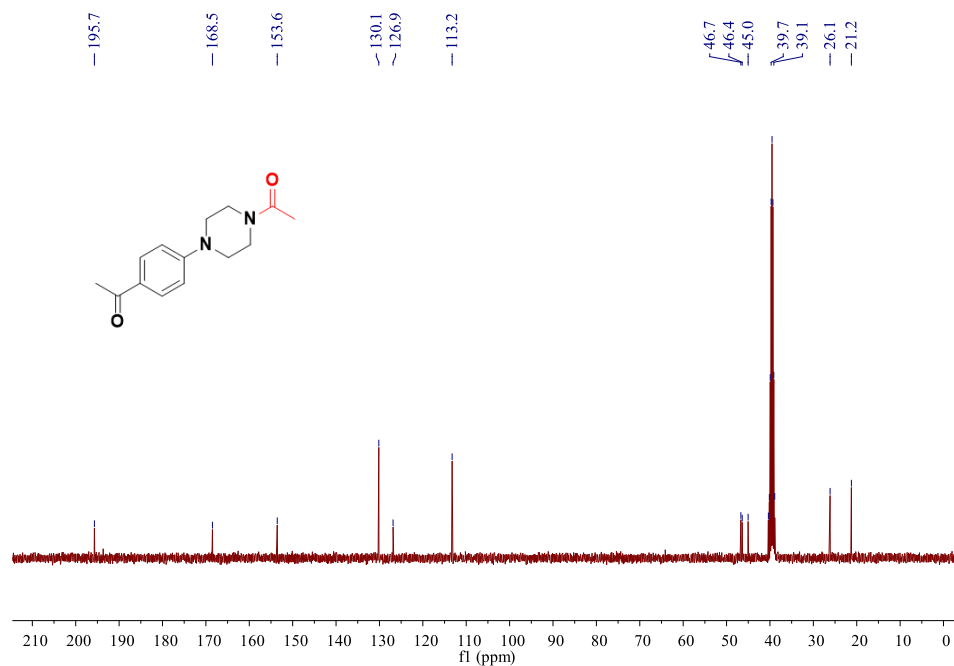

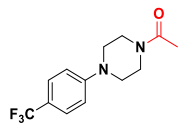

**1-(4-(4-(Trifluoromethyl)phenyl)piperazin-1-yl)ethan-1-one (5bs)**

petroleum ether / ethyl acetate = 2:1, yellow solid, 70% yield (38.1 mg). mp: 75 – 77°C. <sup>1</sup>H NMR (400 MHz, CDCl<sub>3</sub>) δ 7.51 (d, *J* = 8.7 Hz, 2H), 6.93 (d, *J* = 8.7 Hz, 2H), 3.79 – 3.77 (m, 2H), 3.65 – 3.63 (m, 2H), 3.31 – 3.25 (m, 4H), 2.15 (s, 3H). <sup>13</sup>C NMR (100 MHz, CDCl<sub>3</sub>) δ 169.0, 152.8, 126.4 (q, *J* = 3.8 Hz), 124.5 (q, *J* = 270.0 Hz), 121.1 (q, *J* = 30.6 Hz), 114.9, 48.2, 47.9, 45.7, 40.9, 21.2. <sup>19</sup>F NMR (377 MHz, CDCl<sub>3</sub>) δ -61.5 (s, 1F). HRMS (ESI-TOF): Anal Calcd. For. C<sub>13</sub>H<sub>15</sub>F<sub>3</sub>N<sub>2</sub>O+H<sup>+</sup>: 273.1209, Found: 273.1204. IR (neat, cm<sup>-1</sup>): ν 2989, 1614, 1523, 1442, 1329, 1231, 1098, 979, 819, 647.

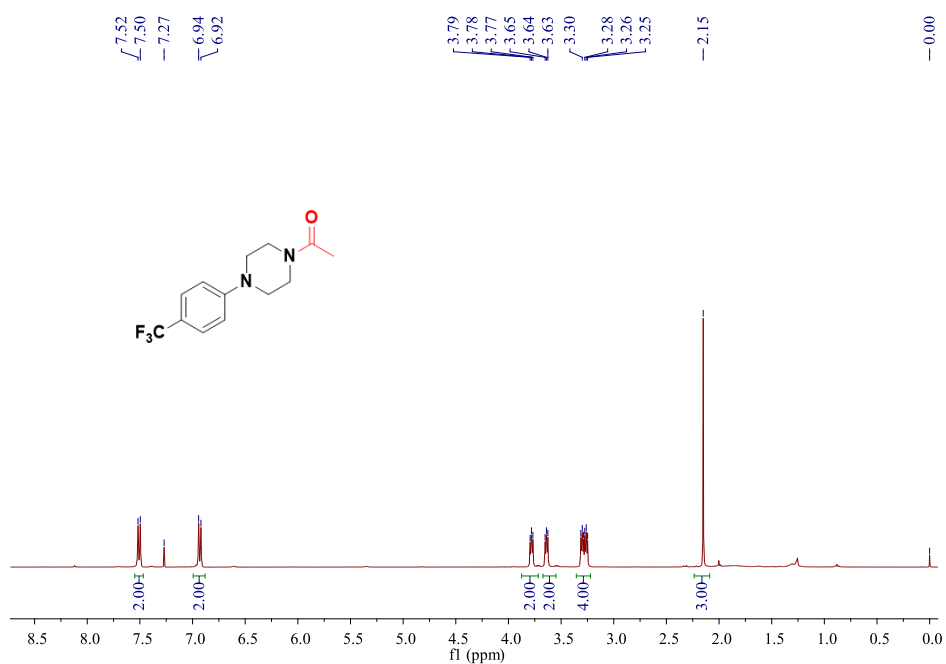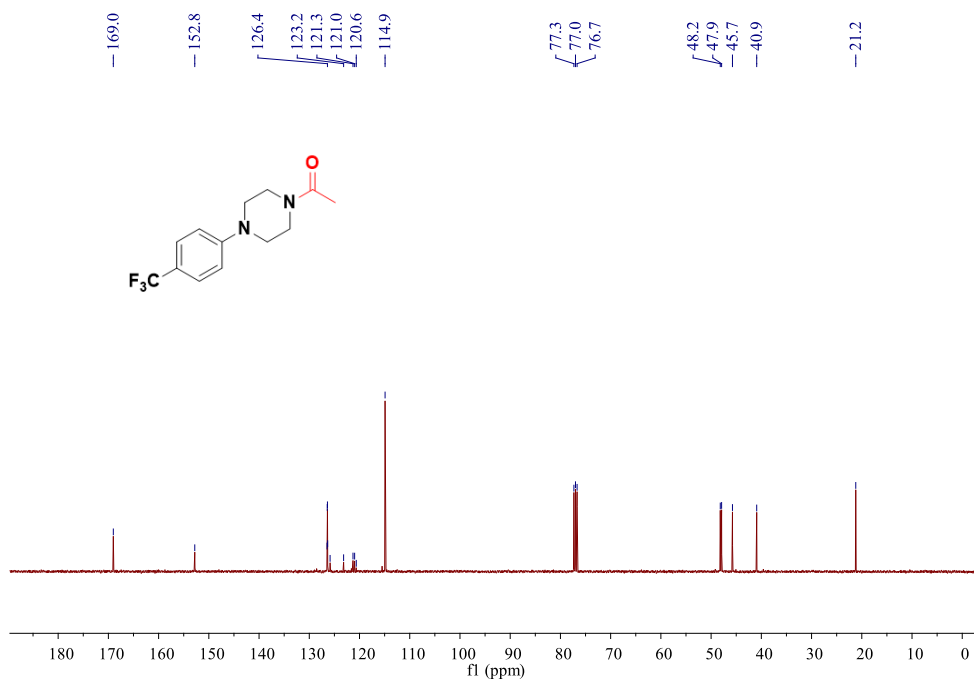

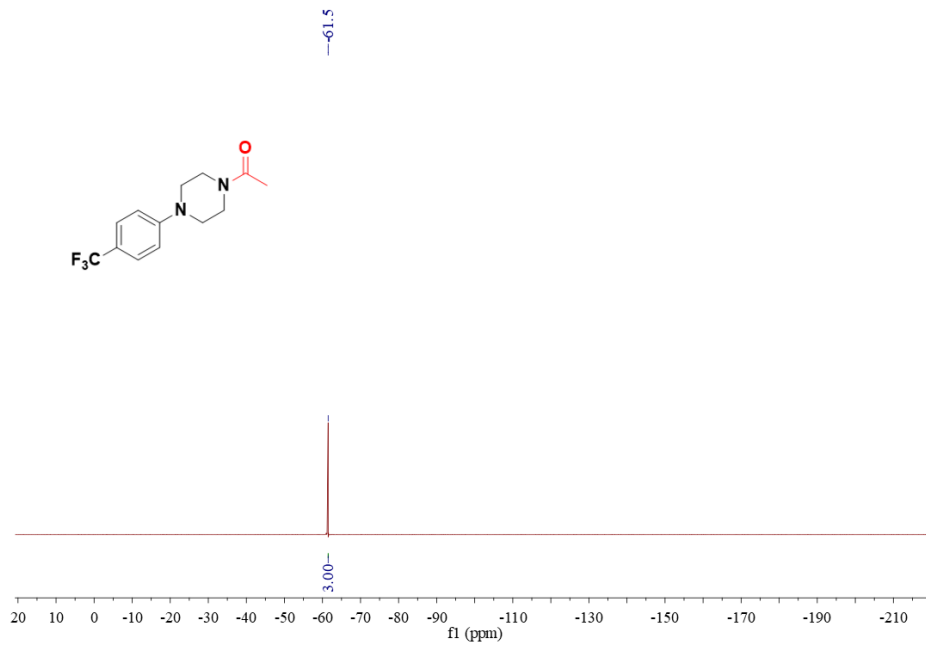



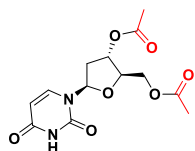

**((2R,3S,5R)-3-Acetoxy-5-(2,4-dioxo-3,4-dihydropyrimidin-1(2H)-yl)tetrahydrofuran-2-yl)methyl acetate (6)**

petroleum ether / ethyl acetate = 1:1, yellow oil, 40% yield (24.8 mg).  $^1\text{H NMR}$  (400 MHz,  $\text{CDCl}_3$ )  $\delta$  9.42 (s, 1H), 7.50 (d,  $J = 8.2$  Hz, 1H), 6.28 (dd,  $J = 8.2, 5.7$  Hz, 1H), 5.79 (d,  $J = 8.2$  Hz, 1H), 5.23 – 5.21 (m, 1H), 4.39 – 4.30 (m, 2H), 4.28 – 4.26 (m, 1H), 2.57 – 2.51 (m, 1H), 2.20 – 2.14 (m, 1H), 2.12 (s, 3H), 2.11 (s, 3H).  $^{13}\text{C NMR}$  (100 MHz,  $\text{CDCl}_3$ )  $\delta$  170.4, 170.2, 163.1, 150.3, 138.9, 103.0, 85.4, 82.4, 74.1, 63.8, 37.9, 29.7, 20.9. **HRMS** (ESI-TOF): Anal Calcd. For.  $\text{C}_{13}\text{H}_{16}\text{N}_2\text{O}_7 + \text{H}^+$ : 313.1030, Found: 313.1030. **IR** (neat,  $\text{cm}^{-1}$ ):  $\nu$  2956, 2851, 1740, 1689, 1460, 1379, 1232, 1197, 905, 726, 648.

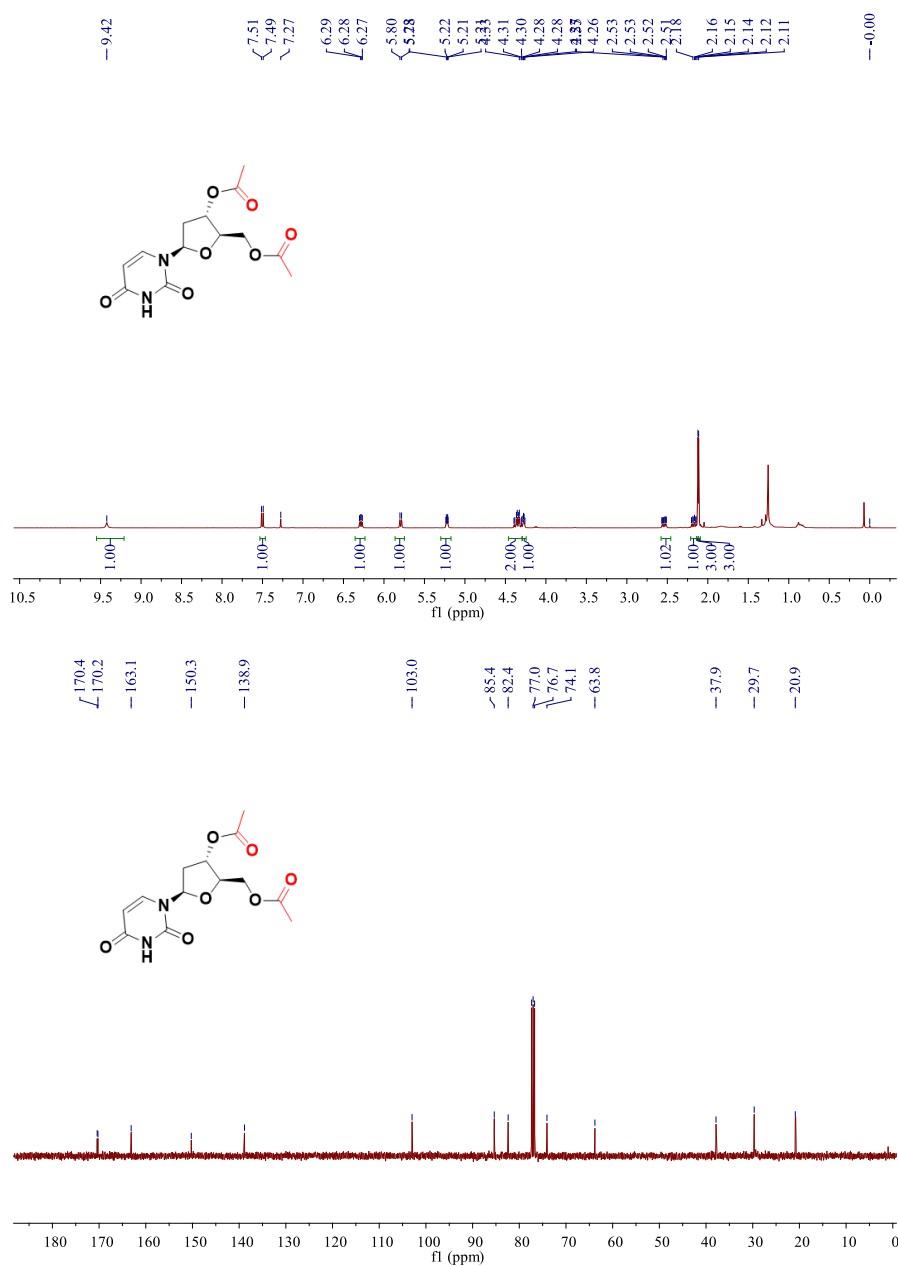

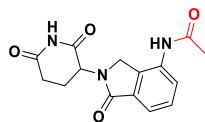

***N*-(2-(2,6-Dioxopiperidin-3-yl)-1-oxoisindolin-4-yl)acetamide (7)**

ethyl acetate, yellow solid, 50% yield (30.0 mg). mp: 235 – 237°C. **<sup>1</sup>H NMR** (400 MHz, DMSO) δ 11.02 (s, 1H), 9.83 (s, 1H), 7.83-7.81 (m, 1H), 7.52 – 7.47 (m, 2H), 5.15 (dd, *J* = 13.3, 5.1 Hz, 1H), 4.43 – 4.31 (q, *J* = 17.5 Hz, 2H), 2.97 – 2.88 (m, 1H), 2.63 – 2.59 (m, 1H), 2.40 – 2.29 (m, 1H), 2.09 (s, 3H), 2.05 – 1.99 (m, 1H). **<sup>13</sup>C NMR** (100 MHz, DMSO) δ 172.9, 171.1, 168.5, 167.9, 133.8, 133.7, 132.7, 128.7, 125.20, 119.1, 51.6, 46.5, 31.3, 23.5, 22.7. **HRMS** (ESI-TOF): Anal Calcd. For. C<sub>15</sub>H<sub>15</sub>N<sub>3</sub>O<sub>4</sub>+Na<sup>+</sup>: 324.0955, Found: 324.0953. **IR** (neat, cm<sup>-1</sup>): ν 3379, 2960, 1662, 1545, 1462, 1322, 1267, 1046, 991, 826, 763.

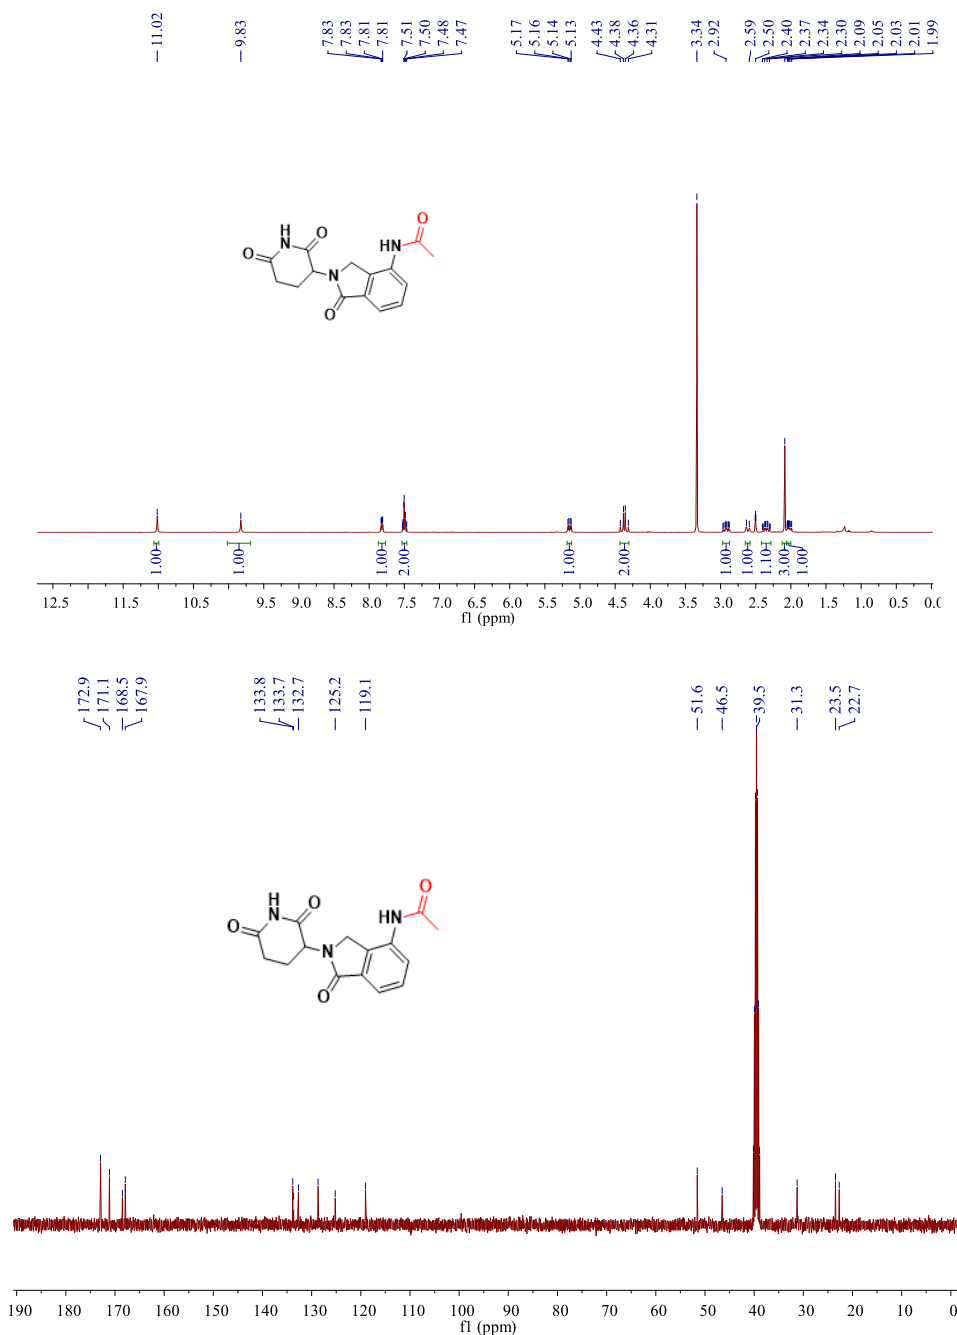

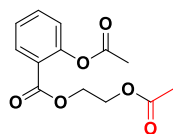

### 2-Acetoxyethyl 2-acetoxybenzoate (8)

petroleum ether / ethyl acetate = 5:1, colorless oil, 76% yield (40.6 mg).  $^1\text{H NMR}$  (400 MHz,  $\text{CDCl}_3$ )  $\delta$  8.04 (d,  $J = 7.8$  Hz, 1H), 7.58 (t,  $J = 7.7$  Hz, 1H), 7.33 (t,  $J = 7.6$  Hz, 1H), 7.11 (d,  $J = 8.1$  Hz, 1H), 4.47 (dd,  $J = 5.4, 3.5$  Hz, 2H), 4.38 (dd,  $J = 5.4, 3.5$  Hz, 2H), 2.35 (s, 3H), 2.09 (s, 3H).  $^{13}\text{C NMR}$  (100 MHz,  $\text{CDCl}_3$ )  $\delta$  170.8, 169.6, 164.1, 150.7, 134.1, 131.8, 126.0, 123.8, 122.8, 62.7, 62.0, 20.9, 20.7. **HRMS** (ESI-TOF): Anal Calcd. For.  $\text{C}_{13}\text{H}_{14}\text{O}_6 + \text{Na}^+$ : 289.0683, Found: 289.0682. **IR** (neat,  $\text{cm}^{-1}$ ):  $\nu$  1729, 1608, 1485, 1371, 1230, 1161, 905, 726, 648.

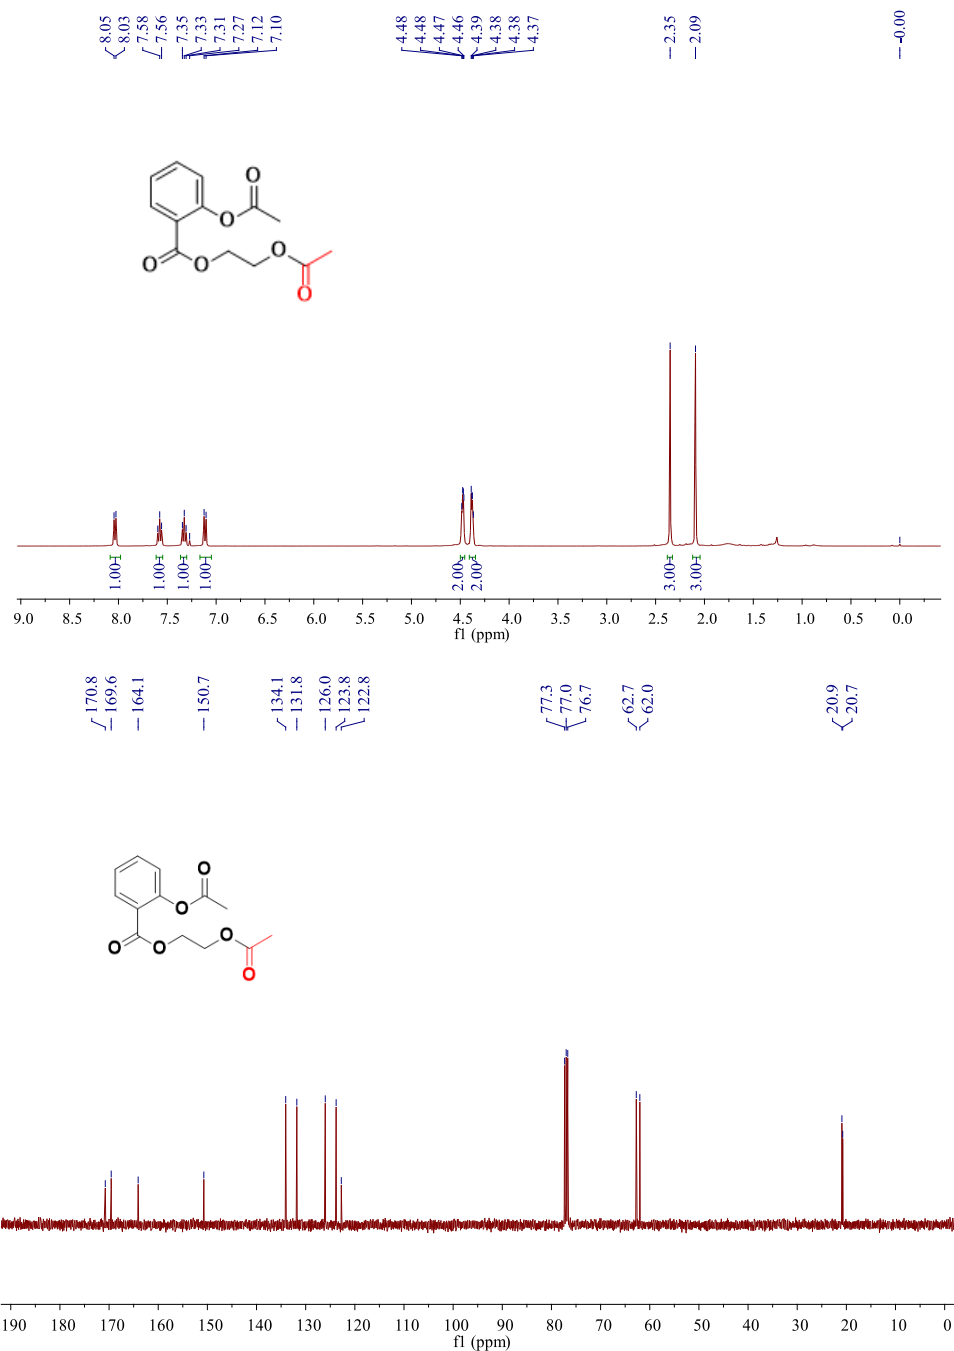

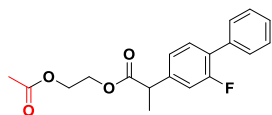

**2-Acetoxyethyl 2-(2-fluoro-[1,1'-biphenyl]-4-yl)propanoate (9)**

petroleum ether / ethyl acetate = 5:1, yellow oil, 85% yield (46.0 mg). <sup>1</sup>H NMR (400 MHz, CDCl<sub>3</sub>) δ 7.54 – 7.52 (m, 2H), 7.45 – 7.34 (m, 4H), 7.16 – 7.12 (m, 2H), 4.32 – 4.20 (m, 4H), 3.78 (q, *J* = 7.2 Hz, 1H), 2.01 (s, 3H), 1.54 (d, *J* = 7.2 Hz, 3H). <sup>13</sup>C NMR (100 MHz, CDCl<sub>3</sub>) δ 173.7, 170.7, 159.60 (d, *J* = 248.2 Hz), 141.5 (d, *J* = 7.7 Hz), 135.4 (d, *J* = 1.4 Hz), 130.7 (d, *J* = 4.0 Hz), 128.9 (d, *J* = 2.9 Hz), 128.4, 127.8 (d, *J* = 13.7 Hz), 127.6, 123.5 (d, *J* = 3.3 Hz), 115.2 (d, *J* = 23.7 Hz), 62.5, 61.9, 44.9, 20.6, 18.2. <sup>19</sup>F NMR (377 MHz, CDCl<sub>3</sub>) δ -117.6 (s, 1F). HRMS (ESI-TOF): Anal Calcd. For. C<sub>19</sub>H<sub>19</sub>FO<sub>4</sub> + Na<sup>+</sup>: 353.1160, Found: 353.1157. IR (neat, cm<sup>-1</sup>): ν 2855, 1735, 1600 1515, 1402, 1237, 915, 822, 723.

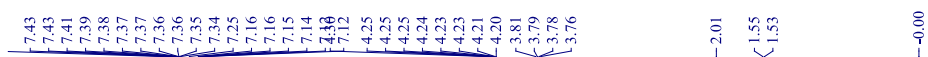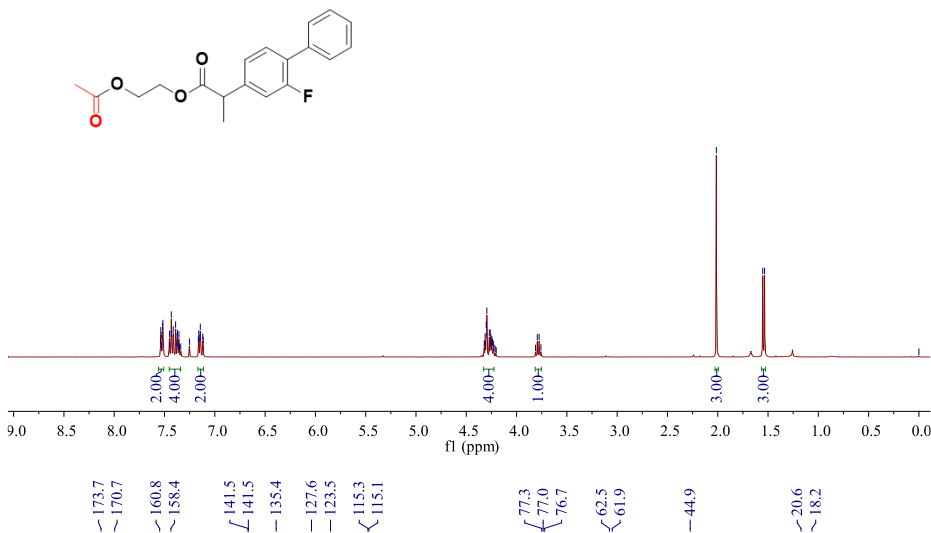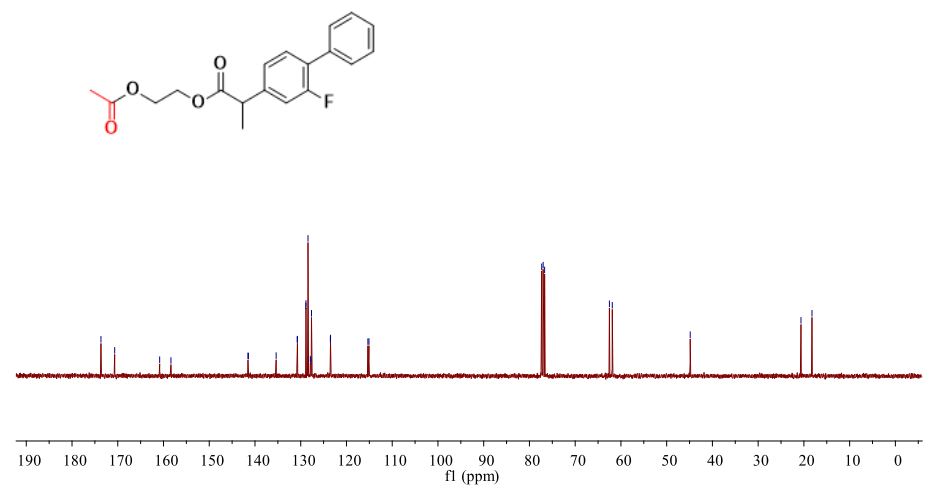

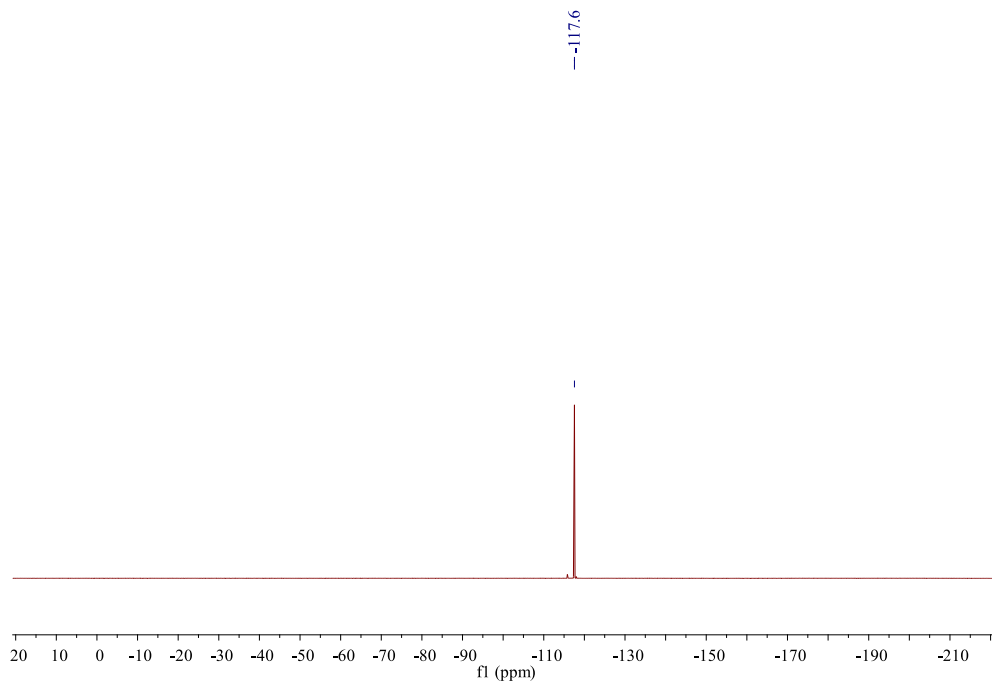

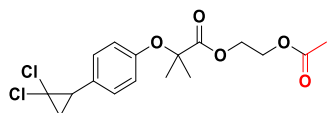

**2-Acetoxyethyl 2-(4-(2,2-dichlorocyclopropyl)phenoxy)-2-methylpropanoate (10)**

petroleum ether / ethyl acetate = 5:1, yellow oil, 40% yield (29.9 mg). **<sup>1</sup>H NMR** (400 MHz, CDCl<sub>3</sub>) δ 7.12 – 7.09 (m, 2H), 6.84 – 6.80 (m, 2H), 4.39 – 4.36 (m, 2H), 4.27 – 4.24 (m, 2H), 2.82 (dd, *J* = 10.6, 8.4 Hz, 1H), 1.99 (s, 3H), 1.94 (dd, *J* = 10.6, 7.4 Hz, 1H), 1.77 (dd, *J* = 8.4, 7.4 Hz, 1H), 1.61 (s, 6H). **<sup>13</sup>C NMR** (100 MHz, CDCl<sub>3</sub>) δ 174.1, 170.7, 154.8, 129.6, 128.3, 118.8, 118.7, 79.1, 62.9, 61.8, 34.8, 25.8, 25.4, 25.4, 20.7. **HRMS** (ESI-TOF): Anal Calcd. For. C<sub>17</sub>H<sub>20</sub><sup>35</sup>Cl<sub>2</sub>O<sub>5</sub>+Na<sup>+</sup>:397.0580, Found: 397.0579. Anal Calcd. For. C<sub>17</sub>H<sub>20</sub><sup>35</sup>Cl<sup>37</sup>ClO<sub>5</sub>+Na<sup>+</sup>:399.0551, Found: 399.0548. Anal Calcd. For. C<sub>17</sub>H<sub>20</sub><sup>37</sup>Cl<sub>2</sub>O<sub>5</sub>+Na<sup>+</sup>:401.0521, Found: 401.0518. **IR** (neat, cm<sup>-1</sup>): ν 2849, 1737, 1611, 1581, 1464, 1374, 1229, 1140, 1048, 754, 760.

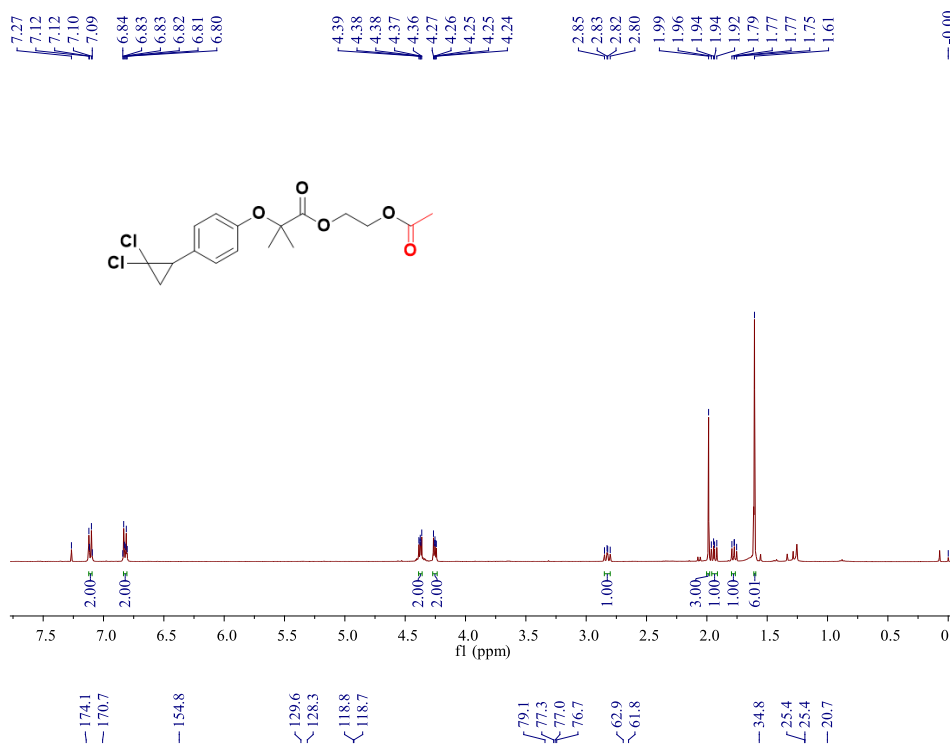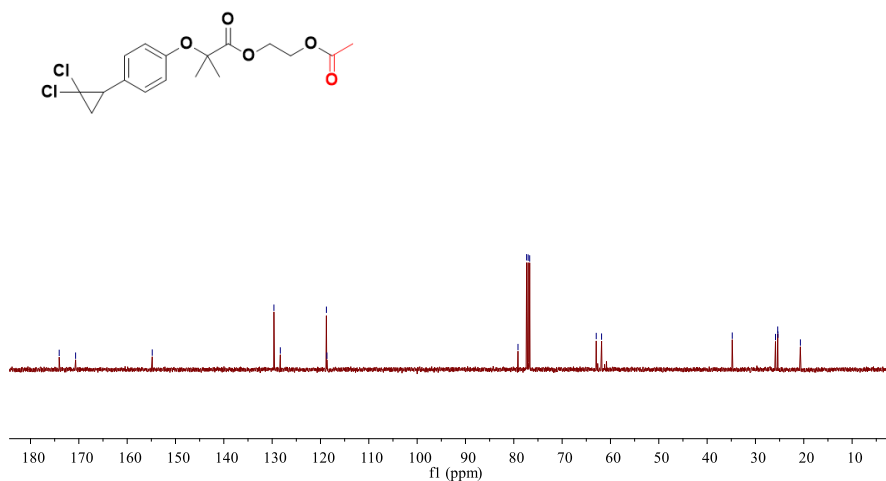

Supplement: d1qo01613j1.pdf [file d1qo01613j1.pdf]
